# Supplementary material for: Derivation and internal validation of prediction models for pulmonary hypertension risk assessment in a cohort inhabiting Tibet, China
Source: eLife journal article supplement (doi:10.7554/elife.98169), 2024-08-07
Supplement: fig3-data1 [file elife-98169-fig3-data1-v1.zip]

## Sheet: PH-DEV-cutoff-45.05
	Tibetan	Gender	Age	RAD	CR	CCR	HVRV	IRBBB	CRBBB	AF	SA	ST	SB	TC	STC	APB	JPB	VPB	PP	CLBBB	IAB	PH	PH2	Set	points	predmodel6	risk	Cutoff	45
1	1	1	74	0	0	1	0	0	0	0	0	0	0	0	0	0	0	0	0	0	0	1	0	1	81.6934	0.659948	1	OR	4.21
2	1	0	81	0	0	1	0	0	0	0	0	0	0	0	0	0	0	0	0	0	0	1	0	1	96.9113	0.756357	1		4.21035 3.7154133 4.7752438
3	0	1	58	0	0	0	0	0	0	0	0	0	0	0	0	0	0	0	0	0	0	1	1	1	53.3333	0.44711	1
4	0	1	42	0	1	0	0	0	0	0	0	0	0	0	0	0	0	0	0	0	0	1	0	1	35.5556	0.318404	0
5	0	1	23	0	0	0	0	0	0	0	0	0	0	0	0	0	0	0	0	0	0	0	0	1	14.4444	0.195797	0
6	0	1	26	0	0	0	0	0	0	0	1	0	0	0	0	0	0	0	0	0	0	1	0	1	17.7778	0.212507	0
7	0	1	23	0	0	0	0	0	0	0	0	0	0	0	0	0	0	0	0	0	0	0	0	1	14.4444	0.195797	0
8	0	1	32	0	0	0	0	0	0	0	0	0	0	0	0	0	0	0	0	0	0	0	0	1	24.4444	0.248973	0
9	1	1	20	0	0	0	0	0	0	0	0	0	1	0	0	0	0	0	0	0	0	0	0	1	21.6934	0.233435	0
10	1	0	49	0	0	0	0	0	0	0	0	0	0	0	0	0	0	0	0	0	0	0	0	1	61.3558	0.50882	1
11	0	0	73	0	0	0	0	0	0	0	0	0	0	1	0	0	0	0	0	0	0	1	1	1	86.9337	0.695259	1
12	1	0	36	0	0	1	0	0	0	0	0	0	0	0	0	0	0	0	0	0	0	1	0	1	46.9113	0.398771	1
13	0	1	36	0	0	0	0	0	0	0	0	0	0	0	0	0	0	0	0	0	0	0	0	1	28.8889	0.275498	0
14	1	1	61	1	0	0	0	0	0	0	0	0	0	0	0	0	0	0	0	0	1	0	0	1	67.2489	0.554085	1
15	1	0	56	0	0	1	1	0	0	0	0	0	0	1	0	0	0	0	0	0	0	1	1	1	78.6271	0.638397	1
16	0	1	38	0	0	0	0	0	0	0	0	0	0	0	0	0	0	0	0	0	0	0	0	1	31.1111	0.289398	0
17	0	0	38	0	0	0	0	0	0	0	0	0	0	0	0	0	0	0	0	0	0	1	0	1	38.5513	0.3388	0
18	0	1	21	0	1	0	0	0	0	0	0	0	0	0	1	0	0	0	0	0	0	0	0	1	12.2222	0.185221	0
19	0	1	44	1	0	0	0	0	0	0	0	0	0	0	0	0	0	0	0	0	0	0	0	1	37.7778	0.333472	0
20	0	1	51	0	0	0	0	0	0	0	0	0	0	0	0	0	0	0	0	0	0	0	0	1	45.5555	0.388781	1
21	1	1	49	0	0	1	0	0	0	0	0	0	0	0	0	0	0	0	0	0	0	0	0	1	53.9156	0.451557	1
22	0	1	30	0	1	0	0	0	0	0	0	0	0	0	0	0	0	0	0	0	0	1	0	1	22.2222	0.236369	0
23	0	1	42	0	1	0	0	0	0	0	0	0	0	0	1	0	0	0	0	0	0	1	0	1	35.5556	0.318404	0
24	1	0	70	0	0	1	0	1	1	0	0	0	0	0	0	0	0	0	0	0	0	1	0	1	123.079	0.874414	1
25	1	1	77	0	0	0	0	0	0	0	0	0	0	0	0	0	0	0	0	0	1	1	1	1	85.0267	0.682645	1
26	1	0	66	1	1	0	1	0	1	1	0	0	0	0	0	0	0	0	0	0	0	1	1	1	142.884	0.9277	1
27	1	0	62	0	0	0	0	0	0	0	0	0	1	0	0	0	0	0	0	0	0	0	0	1	75.8002	0.61802	1
28	0	1	30	1	0	1	0	0	0	0	0	0	0	0	0	0	0	0	0	0	0	0	0	1	22.2222	0.236369	0
29	0	1	41	0	0	0	0	0	0	0	0	0	0	0	0	0	0	0	0	0	0	0	0	1	34.4444	0.311007	0
30	1	1	75	0	0	1	0	0	0	0	0	0	0	0	0	0	0	0	0	0	0	1	0	1	82.8045	0.667602	1
31	0	1	25	1	0	0	0	0	0	0	0	0	0	0	0	0	0	0	0	0	0	0	0	1	16.6667	0.206824	0
32	0	1	19	0	0	0	0	0	0	0	0	0	0	0	0	0	0	0	0	0	0	0	0	1	10	0.175091	0
33	0	1	58	0	0	0	0	0	0	0	0	0	0	0	0	0	0	0	0	0	0	0	0	1	53.3333	0.44711	1
34	0	1	22	1	0	0	0	0	0	0	0	0	0	0	0	0	0	0	0	0	0	0	0	1	13.3333	0.190453	0
35	1	1	40	0	0	0	0	0	0	0	0	0	1	0	0	0	0	0	0	0	0	0	0	1	43.9156	0.376822	0
36	0	1	29	0	0	0	0	0	0	0	0	0	0	0	0	0	0	0	0	0	0	0	0	1	21.1111	0.230234	0
37	0	1	28	1	0	0	0	0	0	0	0	0	0	0	0	0	0	0	0	0	0	0	0	1	20	0.224212	0
38	0	1	60	1	1	0	1	0	0	0	0	0	0	0	0	0	0	0	0	0	0	1	1	1	55.5555	0.464122	1
39	1	1	20	0	0	0	0	0	0	0	1	0	0	0	0	0	0	0	0	0	0	0	0	1	21.6934	0.233435	0
40	0	1	34	0	0	0	0	0	0	0	0	0	0	1	0	0	0	0	0	0	0	0	0	1	36.1602	0.322468	0
41	0	1	34	0	0	0	0	0	0	0	0	0	0	0	0	0	0	0	0	0	0	1	0	1	26.6667	0.262019	0
42	0	1	34	0	0	0	0	1	1	0	0	1	0	0	0	0	0	0	0	0	0	1	0	1	79.1799	0.642326	1
43	0	1	48	0	0	1	0	0	0	0	0	0	0	0	0	0	0	0	0	0	0	0	0	1	42.2222	0.364628	0
44	0	1	70	1	1	0	0	0	0	0	0	0	0	0	0	0	0	0	0	0	0	0	0	1	66.6667	0.54964	1
45	0	0	55	0	0	0	0	0	0	0	0	0	0	1	0	0	0	0	0	0	0	1	0	1	66.9337	0.55168	1
46	0	1	49	0	0	0	0	0	0	0	0	0	0	1	0	0	0	0	0	0	0	0	0	1	52.8269	0.443248	1
47	1	1	71	0	0	0	0	0	0	1	0	0	0	1	0	0	0	0	0	0	0	0	0	1	150.493	0.941956	1
48	0	1	28	0	0	0	0	0	0	0	0	0	0	0	0	0	0	0	0	0	0	0	0	1	20	0.224212	0
49	0	1	72	0	1	0	0	0	0	0	0	0	0	1	0	0	0	0	0	0	0	1	0	1	78.3824	0.636651	1
50	0	1	41	0	0	0	0	0	0	0	1	0	0	0	0	0	0	0	0	0	0	0	0	1	34.4444	0.311007	0
51	0	1	36	0	0	1	0	0	0	0	0	0	0	0	0	0	0	0	0	0	0	0	0	1	28.8889	0.275498	0
52	0	1	22	0	0	0	0	0	0	0	1	0	0	0	0	0	0	0	0	0	0	0	0	1	13.3333	0.190453	0
53	0	1	30	0	0	0	0	0	0	0	0	0	0	0	0	0	0	0	0	0	0	1	0	1	22.2222	0.236369	0
54	0	1	33	0	0	1	0	0	0	0	0	0	0	1	0	0	0	0	0	0	0	0	0	1	35.0491	0.31502	0
55	0	1	39	0	0	0	0	0	0	0	0	0	0	0	0	0	0	0	0	0	0	0	0	1	32.2222	0.296502	0
56	1	0	73	0	0	0	0	0	0	0	0	0	0	0	0	0	0	0	0	0	0	1	0	1	88.0225	0.702332	1
57	1	1	74	0	0	1	0	0	0	0	0	0	1	0	0	0	0	0	0	0	0	0	0	1	81.6934	0.659948	1
58	0	1	36	0	0	0	0	0	0	0	0	0	0	0	0	0	0	0	0	0	0	0	0	1	28.8889	0.275498	0
59	1	1	50	0	0	0	0	0	0	0	0	0	0	0	0	0	0	0	0	0	0	1	0	1	55.0267	0.460064	1
60	0	1	33	1	1	0	0	0	0	0	0	0	0	0	0	0	0	0	0	0	0	0	0	1	25.5556	0.255442	0
61	0	0	22	1	1	0	0	0	0	0	0	0	0	0	0	0	0	0	0	0	0	1	0	1	20.7735	0.228393	0
62	0	1	30	0	0	0	0	0	0	0	0	0	0	0	0	0	0	0	0	0	0	0	0	1	22.2222	0.236369	0
63	0	1	24	0	0	0	0	0	0	0	0	0	0	0	0	0	0	0	0	0	0	0	0	1	15.5556	0.201254	0
64	0	1	35	0	0	0	0	1	1	0	0	0	0	0	0	0	0	0	0	0	0	0	0	1	66.1681	0.545828	1
65	0	1	24	0	0	0	0	0	0	0	0	0	0	0	0	0	0	0	0	0	0	0	0	1	15.5556	0.201254	0
66	1	1	23	0	0	0	0	0	0	0	1	0	0	0	1	0	0	0	0	0	0	0	0	1	25.0267	0.252349	0
67	1	1	20	0	0	0	1	0	0	0	0	0	0	0	0	0	0	0	0	0	0	1	0	1	21.6934	0.233435	0
68	1	1	73	0	0	0	0	0	0	0	0	0	0	0	0	0	0	0	0	0	0	0	0	1	80.5823	0.652209	1
69	0	1	26	0	0	1	0	0	0	0	0	0	0	0	0	0	0	0	0	0	0	0	0	1	17.7778	0.212507	0
70	0	1	23	0	0	0	0	0	0	0	1	0	0	0	0	0	0	0	0	0	0	0	0	1	14.4444	0.195797	0
71	1	1	71	0	0	0	0	0	0	0	0	0	0	0	0	0	0	0	0	0	0	1	0	1	78.36	0.636491	1
72	0	1	51	0	0	0	0	0	0	0	0	0	0	0	0	0	0	0	0	0	0	0	0	1	45.5555	0.388781	1
73	0	1	15	0	0	0	0	0	0	0	0	0	0	0	0	0	0	0	0	0	0	0	0	1	5.55555	0.15615	0
74	0	1	53	0	0	0	0	0	0	0	0	0	0	0	0	0	0	0	0	0	0	0	0	1	47.7778	0.4052	1
75	0	1	45	0	0	0	0	0	0	0	0	0	0	0	0	0	0	0	0	0	0	0	0	1	38.8889	0.341138	0
76	0	1	61	0	1	0	0	0	0	0	0	0	0	0	0	0	0	0	0	0	0	0	0	1	56.6667	0.472662	1
77	1	1	27	0	0	1	0	0	0	0	0	0	0	0	0	0	0	0	0	0	0	1	0	1	29.4711	0.2791	0
78	0	1	39	0	1	0	0	0	0	0	0	0	0	0	0	0	0	0	0	0	0	0	0	1	32.2222	0.296502	0
79	0	1	27	0	0	0	0	0	0	0	1	0	0	0	0	0	0	0	0	0	0	0	0	1	18.8889	0.218303	0
80	1	1	35	0	0	0	0	0	0	0	0	1	0	0	0	0	0	0	0	0	0	0	0	1	52.4829	0.44063	1
81	1	0	28	0	0	1	0	0	0	0	0	0	0	0	0	0	0	0	0	0	0	0	0	1	38.0225	0.335153	0
82	0	1	31	0	0	0	0	0	0	0	0	0	0	0	0	0	0	0	0	0	0	1	0	1	23.3333	0.242615	0
83	0	1	21	0	0	1	0	0	0	0	0	0	0	0	0	0	0	0	0	0	0	0	0	1	12.2222	0.185221	0
84	0	1	25	0	0	0	0	0	0	0	0	0	1	0	0	0	0	0	0	0	0	0	0	1	16.6667	0.206824	0
85	1	0	65	0	0	0	0	0	0	0	0	0	0	0	0	0	0	0	0	0	0	1	0	1	79.1336	0.641998	1
86	1	1	50	0	0	0	0	0	0	0	0	0	0	0	0	0	0	0	0	0	0	1	0	1	55.0267	0.460064	1
87	0	1	46	0	0	0	1	0	0	0	0	0	0	0	0	0	0	0	0	0	0	1	0	1	40	0.348889	0
88	0	0	48	0	0	0	0	0	0	0	0	0	0	0	0	0	0	0	0	0	0	0	0	1	49.6624	0.419295	1
89	0	1	21	0	0	0	0	0	0	0	0	0	0	0	0	0	0	0	0	0	0	0	0	1	12.2222	0.185221	0
90	1	0	35	0	0	1	0	0	0	0	1	0	0	0	0	0	0	0	0	0	0	0	0	1	45.8002	0.390577	1
91	0	1	33	0	0	0	0	0	0	0	0	1	0	0	0	0	0	0	0	0	0	0	0	1	39.6784	0.346637	0
92	1	0	80	0	0	0	0	0	0	0	0	0	0	1	0	0	0	0	0	0	0	1	1	1	105.294	0.800841	1
93	1	1	86	0	0	0	0	0	0	0	0	0	0	0	0	0	0	0	0	0	0	1	0	1	95.0267	0.745477	1
94	0	1	28	0	0	0	0	0	0	0	0	0	0	0	0	0	0	0	0	0	0	0	0	1	20	0.224212	0
95	0	0	45	1	1	0	1	0	0	0	0	0	0	0	0	0	0	0	0	0	0	1	0	1	46.3291	0.39447	1
96	1	1	51	0	0	1	0	0	0	0	0	0	0	1	0	0	0	0	0	0	0	1	0	1	65.6313	0.541718	1
97	1	0	61	0	0	0	0	0	0	0	0	0	0	1	0	0	0	0	0	0	0	1	1	1	84.1827	0.676974	1
98	0	1	35	0	0	0	1	0	0	0	0	0	0	0	0	0	0	0	0	0	0	1	0	1	27.7778	0.268705	0
99	1	0	43	0	0	0	0	0	0	0	0	0	0	1	0	0	0	0	0	0	0	1	0	1	64.1827	0.530597	1
100	0	1	33	0	0	0	0	0	0	0	0	0	0	0	0	0	0	0	0	0	0	0	0	1	25.5556	0.255442	0
101	0	1	36	0	0	0	0	0	0	0	0	0	0	0	0	0	0	0	0	0	0	0	0	1	28.8889	0.275498	0
102	1	0	50	0	0	0	0	0	0	0	0	0	0	0	0	0	0	0	0	0	0	0	0	1	62.4669	0.517388	1
103	0	0	50	0	0	1	0	0	0	0	0	0	0	0	1	0	0	0	0	0	0	1	0	1	51.8846	0.436083	1
104	0	1	22	0	0	0	0	0	0	0	0	0	1	0	0	0	0	0	0	0	0	0	0	1	13.3333	0.190453	0
105	0	1	39	0	0	0	0	0	0	0	0	0	0	0	0	0	0	0	0	0	0	0	0	1	32.2222	0.296502	0
106	0	1	18	0	0	0	0	0	0	0	0	0	0	0	0	0	0	0	0	0	0	0	0	1	8.88889	0.170193	0
107	1	0	43	0	0	0	0	0	0	0	0	0	0	0	0	0	0	0	0	0	0	1	0	1	54.6891	0.457477	1
108	1	1	46	0	0	0	0	0	0	0	0	0	0	0	0	0	0	0	0	0	0	1	1	1	50.5823	0.426224	1
109	1	0	62	0	0	0	0	0	0	0	0	0	0	0	0	0	0	0	0	0	0	1	0	1	75.8002	0.61802	1
110	0	1	33	0	0	0	0	0	0	0	0	0	0	0	0	0	0	0	0	0	0	0	0	1	25.5556	0.255442	0
111	0	1	21	1	1	0	0	0	0	0	0	0	1	0	0	0	0	0	0	0	0	1	0	1	12.2222	0.185221	0
112	0	0	53	0	0	0	0	0	0	0	0	0	0	0	1	0	0	0	0	0	0	1	0	1	55.218	0.461531	1
113	1	1	60	0	0	0	0	0	0	0	0	0	0	0	0	0	0	0	0	0	0	1	1	1	66.1378	0.545596	1
114	1	0	49	0	0	0	0	0	0	0	0	0	0	0	0	0	0	0	0	0	0	0	0	1	61.3558	0.50882	1
115	1	0	22	0	0	1	0	0	0	0	0	1	0	1	0	0	0	0	0	0	0	1	0	1	54.9722	0.459646	1
116	1	1	68	0	0	1	0	0	0	0	0	0	0	0	0	0	0	0	0	0	0	0	0	1	75.0267	0.612367	1
117	1	0	70	0	0	0	0	0	0	0	1	0	0	0	0	0	0	0	0	0	0	1	0	1	84.6891	0.680383	1
118	0	1	35	0	0	0	0	0	0	0	0	0	0	0	0	0	0	0	0	0	0	0	0	1	27.7778	0.268705	0
119	0	0	34	0	0	0	0	0	0	0	0	0	0	0	0	0	0	0	0	0	0	0	0	1	34.1069	0.308778	0
120	0	1	33	0	0	0	0	0	0	0	0	0	1	0	0	0	0	0	0	0	0	1	0	1	25.5556	0.255442	0
121	0	1	33	0	0	0	0	0	0	0	1	0	0	0	0	0	0	0	0	0	0	1	0	1	25.5556	0.255442	0
122	0	1	36	0	0	0	0	0	0	0	0	0	0	0	0	0	0	0	0	0	0	0	0	1	28.8889	0.275498	0
123	0	0	43	0	0	0	0	0	1	0	0	0	0	0	0	0	0	0	0	0	0	0	0	1	44.1069	0.378209	0
124	0	1	36	0	0	0	0	0	0	0	0	0	1	0	0	0	0	0	0	0	0	0	0	1	28.8889	0.275498	0
125	0	1	26	0	0	0	0	0	0	0	0	0	0	0	0	0	0	0	0	0	0	1	0	1	17.7778	0.212507	0
126	1	0	84	0	0	0	0	1	1	0	0	0	0	0	1	0	0	0	0	0	1	1	1	1	138.635	0.918395	1
127	1	0	37	0	0	1	0	0	0	0	0	0	0	0	0	0	0	0	0	0	0	0	0	1	48.0225	0.407022	1
128	1	1	43	1	1	0	1	0	0	0	0	0	0	0	0	0	0	0	0	0	0	1	0	1	47.2489	0.401272	1
129	0	1	34	0	1	0	0	0	0	0	0	0	1	0	0	0	0	0	0	0	0	1	0	1	26.6667	0.262019	0
130	0	1	31	0	0	1	0	0	0	0	1	0	0	0	0	0	0	0	0	0	0	1	0	1	23.3333	0.242615	0
131	0	1	31	0	0	0	0	0	0	0	0	0	0	0	0	0	0	0	0	0	0	0	0	1	23.3333	0.242615	0
132	1	1	29	1	1	0	0	0	0	0	0	0	0	0	0	0	0	0	0	0	0	0	0	1	31.6934	0.293108	0
133	0	0	53	0	0	1	0	0	0	0	0	0	0	0	0	0	0	0	0	0	0	1	0	1	55.218	0.461531	1
134	0	0	36	0	0	0	0	0	0	0	0	0	0	0	0	0	0	0	0	0	0	0	0	1	36.3291	0.323608	0
135	1	0	45	0	0	0	0	0	0	0	0	0	0	0	0	0	0	0	0	0	0	0	0	1	56.9113	0.474545	1
136	0	1	24	0	0	0	0	0	0	0	0	0	0	0	0	0	0	0	0	0	0	0	0	1	15.5556	0.201254	0
137	0	1	29	1	1	0	1	0	0	0	0	0	1	0	0	0	0	0	0	0	0	1	0	1	21.1111	0.230234	0
138	0	1	24	0	0	0	0	0	0	0	0	0	0	1	0	0	0	0	0	0	0	0	0	1	25.0491	0.25248	0
139	0	1	22	0	0	0	0	0	0	0	1	0	0	0	0	0	0	0	0	0	0	0	0	1	13.3333	0.190453	0
140	0	1	28	0	0	0	0	0	0	0	0	0	0	0	0	0	0	0	0	0	0	0	0	1	20	0.224212	0
141	0	1	34	0	1	0	0	0	0	0	0	0	0	0	0	0	0	0	0	0	0	1	0	1	26.6667	0.262019	0
142	1	0	60	0	0	0	0	0	0	0	0	1	0	0	0	0	0	0	1	0	0	1	1	1	87.7009	0.700252	1
143	1	0	37	0	0	0	0	0	0	0	0	0	0	1	0	0	0	0	0	0	0	1	0	1	57.516	0.479201	1
144	1	0	65	0	0	0	0	0	0	0	0	0	0	0	0	0	0	0	0	0	0	0	0	1	79.1336	0.641998	1
145	1	1	56	1	0	0	0	0	0	0	0	1	0	1	0	0	0	0	0	0	0	1	1	1	85.3098	0.684535	1
146	1	0	30	0	0	1	0	0	0	0	0	0	0	0	0	0	0	0	0	0	0	1	0	1	40.2447	0.350606	0
147	0	1	40	0	0	0	0	0	0	0	0	0	1	0	0	0	0	0	0	0	0	0	0	1	33.3333	0.303706	0
148	0	1	30	1	1	0	1	0	0	0	0	0	0	0	0	0	0	0	0	0	0	1	0	1	22.2222	0.236369	0
149	0	1	28	0	0	1	0	0	0	0	0	0	0	0	0	0	0	1	0	0	0	0	0	1	20	0.224212	0
150	0	1	22	1	1	0	1	0	0	0	1	0	0	0	0	0	0	0	0	0	0	0	0	1	13.3333	0.190453	0
151	0	0	44	0	0	0	0	0	0	0	0	0	0	0	0	0	0	0	0	0	0	0	0	1	45.218	0.386308	1
152	1	1	67	0	0	1	0	0	1	0	0	0	0	0	0	0	0	0	0	0	0	0	0	1	73.9156	0.604195	1
153	1	1	68	0	1	0	0	0	0	0	0	0	0	1	0	0	0	0	0	0	0	1	1	1	84.5202	0.679249	1
154	1	1	69	0	0	0	0	0	0	1	0	0	0	0	0	0	0	0	0	0	0	1	1	1	138.777	0.918723	1
155	0	1	30	0	1	0	0	0	0	0	0	0	0	0	0	0	0	0	0	0	0	0	0	1	22.2222	0.236369	0
156	1	0	52	0	0	0	0	0	0	0	0	0	0	0	0	0	0	0	0	0	1	1	1	1	64.6891	0.534489	1
157	1	0	36	0	0	1	0	0	0	0	0	0	1	0	0	0	0	0	0	0	0	1	0	1	46.9113	0.398771	1
158	0	1	30	0	0	0	0	0	0	0	0	0	0	0	0	0	0	0	0	0	0	0	0	1	22.2222	0.236369	0
159	0	1	37	0	0	0	0	0	0	0	0	0	0	0	0	0	0	0	0	0	0	0	0	1	30	0.282396	0
160	1	1	92	0	0	0	0	0	0	0	0	0	0	0	0	0	0	0	0	0	0	1	0	1	101.693	0.782521	1
161	0	1	44	0	0	0	0	0	0	0	0	0	0	0	0	0	0	0	0	0	0	1	0	1	37.7778	0.333472	0
162	1	1	22	0	0	0	0	0	0	0	0	0	0	0	0	0	0	0	0	0	0	0	0	1	23.9156	0.245933	0
163	0	1	45	0	0	1	0	0	0	0	0	0	1	0	0	0	0	0	0	0	0	0	0	1	38.8889	0.341138	0
164	0	1	21	0	0	0	0	0	0	0	0	0	1	1	0	0	0	0	0	0	0	1	0	1	21.7158	0.233559	0
165	1	1	26	0	0	0	0	0	0	0	0	0	0	0	0	0	0	0	0	0	0	0	0	1	28.36	0.272252	0
166	0	1	26	0	1	0	0	0	0	0	0	0	0	0	0	0	0	0	0	0	0	0	0	1	17.7778	0.212507	0
167	0	1	33	0	1	0	0	0	0	0	0	0	0	0	0	0	0	0	0	0	0	0	0	1	25.5556	0.255442	0
168	0	1	26	0	0	0	0	0	0	0	0	0	0	0	0	0	0	0	1	0	0	1	0	1	17.7778	0.212507	0
169	1	1	78	0	0	0	0	0	1	0	0	0	0	1	0	0	0	0	0	0	0	1	1	1	95.6313	0.749002	1
170	0	1	49	0	0	0	0	0	0	0	0	0	0	0	0	0	0	0	0	0	0	0	0	1	43.3333	0.37261	0
171	1	0	67	0	0	1	0	0	0	0	0	0	0	1	0	0	0	0	0	0	0	1	0	1	90.8493	0.720247	1
172	0	1	22	0	1	0	0	0	0	0	1	0	0	0	0	0	0	0	0	0	0	0	0	1	13.3333	0.190453	0
173	1	1	56	1	1	0	1	0	0	0	0	1	0	0	0	0	0	0	0	0	0	0	0	1	75.8162	0.618136	1
174	1	1	73	0	0	0	0	0	0	0	0	0	0	0	0	0	0	0	0	0	0	1	0	1	80.5823	0.652209	1
175	1	1	26	0	0	0	0	0	0	0	0	0	0	0	0	0	0	0	0	0	0	0	0	1	28.36	0.272252	0
176	1	0	66	0	0	0	0	0	1	1	0	0	0	0	0	0	0	0	0	0	0	1	1	1	142.884	0.9277	1
177	0	1	26	0	0	0	0	0	0	0	0	0	0	0	0	0	0	0	0	0	0	0	0	1	17.7778	0.212507	0
178	1	1	70	0	0	1	0	0	0	0	0	0	0	0	0	0	0	0	0	0	0	1	0	1	77.2489	0.628519	1
179	0	1	20	0	0	0	0	0	0	0	0	0	0	0	0	0	0	0	0	0	0	0	0	1	11.1111	0.1801	0
180	0	1	50	0	0	0	0	0	0	0	0	0	0	0	0	0	0	0	0	0	0	0	0	1	44.4444	0.380663	0
181	1	0	74	1	1	0	1	0	1	0	0	0	0	0	0	0	0	1	0	0	0	1	0	1	89.1336	0.709452	1
182	1	1	78	0	0	1	0	0	0	0	0	0	0	0	0	0	0	0	0	0	0	0	0	1	86.1378	0.690028	1
183	0	0	23	0	0	0	0	0	0	0	0	0	0	0	0	0	0	0	0	0	0	1	0	1	21.8846	0.234493	0
184	0	1	31	1	1	0	1	0	0	0	0	0	0	0	0	0	0	0	0	0	0	0	0	1	23.3333	0.242615	0
185	0	0	62	0	0	1	0	0	0	0	0	0	0	0	1	0	0	0	0	0	0	0	0	1	65.218	0.538548	1
186	0	0	23	0	0	0	0	0	0	0	0	1	0	0	0	0	0	0	0	0	0	0	0	1	36.0075	0.321439	0
187	1	0	64	0	0	1	0	0	0	0	0	1	0	0	0	0	0	0	0	0	0	1	1	1	92.1453	0.728236	1
188	0	1	51	0	0	1	0	0	0	0	0	0	0	0	0	0	0	0	0	0	0	1	0	1	45.5555	0.388781	1
189	1	1	81	0	1	0	0	0	0	0	0	0	0	0	0	0	0	0	0	0	1	0	0	1	89.4711	0.711595	1
190	0	1	33	0	0	1	0	0	0	0	1	0	0	0	0	0	0	0	0	0	0	0	0	1	25.5556	0.255442	0
191	0	1	30	0	0	0	0	0	0	0	0	0	0	1	0	0	0	0	0	0	0	1	0	1	31.7158	0.293251	0
192	1	0	44	0	0	0	1	0	0	0	0	0	0	1	0	0	0	0	0	0	0	0	0	1	65.2938	0.53913	1
193	0	1	29	0	0	0	0	0	0	0	0	0	0	0	0	0	0	0	0	0	0	0	0	1	21.1111	0.230234	0
194	1	1	52	0	0	0	0	0	0	0	0	0	0	0	0	0	0	0	0	0	0	0	0	1	57.2489	0.477144	1
195	0	1	34	0	0	0	0	0	0	0	0	0	0	0	0	0	0	0	0	0	0	0	0	1	26.6667	0.262019	0
196	1	1	40	0	0	0	0	0	0	0	0	0	1	0	0	0	0	0	0	0	0	1	0	1	43.9156	0.376822	0
197	0	1	23	1	1	0	1	0	0	0	0	0	0	0	0	0	0	0	0	0	0	0	0	1	14.4444	0.195797	0
198	1	0	41	0	0	1	0	0	0	0	0	0	0	0	0	0	0	0	0	0	0	0	0	1	52.4669	0.440508	1
199	0	1	24	0	0	0	0	0	0	0	0	0	0	0	0	0	0	0	0	0	0	0	0	1	15.5556	0.201254	0
200	0	1	46	0	0	0	0	0	0	0	0	0	0	0	0	0	0	0	0	0	0	1	0	1	40	0.348889	0
201	0	1	26	0	0	0	0	0	0	0	0	0	0	0	0	0	0	0	0	0	0	0	0	1	17.7778	0.212507	0
202	1	1	38	0	0	1	0	0	0	0	0	0	0	0	0	0	0	0	0	0	0	1	0	1	41.6934	0.360855	0
203	0	1	35	0	0	0	0	0	0	0	0	0	0	0	0	0	0	0	0	0	0	1	0	1	27.7778	0.268705	0
204	0	1	29	1	0	0	0	0	0	0	0	0	0	0	0	0	0	0	0	0	0	1	0	1	21.1111	0.230234	0
205	1	1	53	1	1	0	1	0	0	0	0	0	0	1	0	0	0	0	0	0	0	1	0	1	67.8536	0.558692	1
206	0	1	34	0	0	0	0	0	0	0	0	0	0	0	0	0	0	0	0	0	0	1	0	1	26.6667	0.262019	0
207	0	1	21	0	0	0	0	0	0	0	1	0	0	0	0	0	0	0	0	0	0	0	0	1	12.2222	0.185221	0
208	1	0	62	0	0	1	0	0	0	0	0	0	0	0	0	0	0	0	0	0	0	0	0	1	75.8002	0.61802	1
209	0	1	30	0	0	1	0	0	0	0	0	0	0	0	0	0	0	0	0	0	0	0	0	1	22.2222	0.236369	0
210	1	0	26	0	0	0	0	0	0	0	0	0	0	0	0	0	0	0	0	0	0	0	0	1	35.8002	0.320045	0
211	1	1	39	0	0	0	0	1	1	0	0	0	0	0	0	0	0	0	0	0	0	1	1	1	81.1948	0.656486	1
212	1	1	63	1	1	0	0	1	1	0	0	1	0	0	0	0	0	0	0	0	0	1	0	1	121.984	0.870655	1
213	1	0	50	0	0	1	0	0	0	0	0	0	0	0	0	0	0	0	0	0	0	1	0	1	62.4669	0.517388	1
214	0	1	28	0	0	0	0	0	0	0	1	0	0	0	0	0	0	0	0	0	0	0	0	1	20	0.224212	0
215	1	1	46	0	0	0	0	0	0	0	0	0	0	0	0	0	0	0	0	0	0	0	0	1	50.5823	0.426224	1
216	0	0	20	0	0	0	0	0	0	0	1	0	0	0	0	0	0	0	0	0	0	0	0	1	18.5513	0.21653	0
217	1	1	66	1	1	0	1	1	1	0	0	0	0	0	0	0	0	0	0	0	0	0	0	1	111.195	0.828312	1
218	0	1	22	1	1	0	0	0	0	0	0	0	0	0	0	0	0	0	0	0	0	1	0	1	13.3333	0.190453	0
219	0	1	47	1	1	0	1	0	0	0	0	0	0	0	0	0	0	0	0	0	0	1	1	1	41.1111	0.35672	0
220	1	1	63	0	0	0	0	0	0	0	0	0	0	0	1	0	0	0	0	0	0	1	1	1	69.4711	0.570964	1
221	0	1	56	0	0	0	0	0	0	0	0	0	0	0	0	0	0	0	0	0	1	1	0	1	51.1111	0.430221	1
222	0	1	45	0	0	0	0	0	0	0	1	0	0	0	1	0	0	0	0	0	0	0	0	1	38.8889	0.341138	0
223	0	0	52	0	1	0	0	0	0	0	0	0	0	0	0	0	0	0	0	0	0	1	0	1	54.1069	0.45302	1
224	1	0	59	1	1	0	1	0	0	1	0	0	0	0	1	0	0	0	0	0	1	1	1	1	135.106	0.90985	1
225	0	1	64	0	0	0	0	0	0	0	0	1	0	0	0	0	0	0	0	0	0	1	0	1	74.1228	0.605724	1
226	1	0	58	0	0	0	0	0	0	0	0	0	0	0	0	0	0	0	0	0	0	1	0	1	71.3558	0.585152	1
227	0	1	53	0	0	0	0	0	0	0	1	0	0	0	0	0	0	0	0	0	0	1	0	1	47.7778	0.4052	1
228	0	1	26	1	1	0	1	0	0	0	0	0	0	0	0	0	0	0	0	0	0	0	0	1	17.7778	0.212507	0
229	1	1	33	0	0	0	0	0	0	0	0	0	0	0	0	0	0	0	0	0	0	0	0	1	36.1378	0.322317	0
230	0	1	30	0	0	0	0	0	0	0	0	0	0	1	0	0	0	0	1	0	0	0	0	1	31.7158	0.293251	0
231	0	1	42	1	0	0	0	0	0	0	0	0	0	0	0	0	0	0	0	0	0	0	0	1	35.5556	0.318404	0
232	0	0	47	0	0	0	0	0	0	0	0	0	0	0	0	0	0	0	0	0	0	0	0	1	48.5513	0.410968	1
233	0	1	44	0	0	0	0	0	0	0	0	0	0	0	0	0	0	0	0	0	0	1	0	1	37.7778	0.333472	0
234	0	0	47	0	0	1	0	0	0	0	0	0	1	0	0	0	0	0	0	0	0	1	0	1	48.5513	0.410968	1
235	0	1	54	0	0	0	0	0	0	0	0	1	0	0	1	0	0	0	0	0	0	1	0	1	63.0117	0.521586	1
236	0	1	49	0	0	0	0	0	0	0	0	0	0	0	0	0	0	0	0	0	0	0	0	1	43.3333	0.37261	0
237	1	0	54	0	0	0	0	0	0	0	0	0	0	0	0	0	0	0	0	0	0	0	0	1	66.9113	0.551509	1
238	0	1	43	0	0	1	0	0	0	0	0	0	0	0	0	0	0	0	0	0	0	1	0	1	36.6667	0.325893	0
239	1	0	56	0	0	1	0	0	0	0	0	0	0	0	0	0	0	0	0	0	0	0	0	1	69.1336	0.56841	1
240	0	1	34	0	0	0	0	0	0	0	0	0	0	0	0	0	0	0	0	0	0	0	0	1	26.6667	0.262019	0
241	0	1	64	0	0	1	0	0	0	0	0	0	0	0	1	0	0	0	0	0	0	0	0	1	60	0.498358	1
242	0	1	31	0	0	0	0	0	0	0	0	0	0	0	1	0	0	0	0	0	0	0	0	1	23.3333	0.242615	0
243	1	0	42	0	0	0	0	0	0	0	0	0	1	0	0	0	0	0	0	0	0	1	0	1	53.578	0.448978	1
244	1	1	37	0	0	0	0	0	0	0	0	0	0	1	0	0	0	0	0	0	0	1	0	1	50.0758	0.422405	1
245	1	1	74	0	0	0	0	0	1	0	0	0	0	0	0	0	0	0	0	0	1	1	0	1	81.6934	0.659948	1
246	1	0	62	0	0	0	0	0	0	0	0	0	0	1	0	0	0	0	0	0	0	1	0	1	85.2938	0.684428	1
247	0	0	57	0	0	1	0	0	0	0	0	0	1	0	0	0	0	0	0	0	0	1	0	1	59.6624	0.495753	1
248	0	1	44	0	0	0	0	0	0	0	0	0	0	0	1	0	0	0	0	0	0	0	0	1	37.7778	0.333472	0
249	0	1	33	0	0	0	0	0	0	0	1	0	0	0	0	0	0	0	0	0	0	0	0	1	25.5556	0.255442	0
250	1	1	55	0	0	0	0	0	0	0	0	0	0	0	1	0	0	0	0	0	0	0	0	1	60.5823	0.502851	1
251	0	1	24	0	0	0	0	0	0	0	0	0	0	0	0	0	0	0	0	0	0	1	0	1	15.5556	0.201254	0
252	1	1	24	0	0	0	0	0	0	0	0	0	0	0	0	0	0	0	0	0	0	0	0	1	26.1378	0.258875	0
253	0	0	51	0	0	0	0	0	0	0	0	0	0	0	0	0	0	0	0	0	0	0	0	1	52.9957	0.444535	1
254	0	1	34	0	0	0	0	0	0	0	0	0	0	1	0	0	0	0	0	0	0	0	0	1	36.1602	0.322468	0
255	1	1	68	0	0	0	1	0	0	0	0	0	0	1	0	0	0	0	0	0	0	1	1	1	84.5202	0.679249	1
256	0	1	26	1	0	0	0	0	0	0	0	0	1	0	0	0	0	0	0	0	0	0	0	1	17.7778	0.212507	0
257	0	1	26	0	0	0	0	0	0	0	0	0	0	0	0	0	0	0	0	0	0	1	0	1	17.7778	0.212507	0
258	1	0	48	0	0	0	0	0	0	0	0	0	1	0	0	0	0	0	0	0	0	1	0	1	60.2447	0.500246	1
259	0	1	46	0	0	0	0	0	0	0	0	0	0	0	0	0	0	0	0	0	0	0	0	1	40	0.348889	0
260	1	1	66	0	0	0	0	0	0	0	0	0	0	0	0	0	0	0	0	0	0	0	0	1	72.8045	0.595965	1
261	1	1	23	0	0	0	0	0	0	0	0	0	0	0	0	0	0	0	1	0	0	0	0	1	25.0267	0.252349	0
262	0	1	40	0	0	0	0	0	0	0	0	0	0	0	0	0	0	0	0	0	0	0	0	1	33.3333	0.303706	0
263	0	1	83	0	0	0	0	0	0	0	0	0	0	0	0	0	0	0	0	0	0	1	0	1	81.1111	0.655903	1
264	1	1	71	0	0	0	0	0	0	0	0	0	0	0	0	0	0	0	0	0	0	0	0	1	78.36	0.636491	1
265	0	1	43	0	0	1	0	0	0	0	0	1	0	0	0	0	0	0	0	0	0	1	0	1	50.7895	0.427789	1
266	0	1	50	0	0	0	0	0	0	0	0	0	0	0	0	0	0	0	1	0	0	0	0	1	44.4444	0.380663	0
267	1	1	69	0	0	0	0	0	0	1	0	0	0	0	0	0	0	0	0	0	0	1	1	1	138.777	0.918723	1
268	0	1	40	0	0	0	0	0	0	0	0	0	0	0	0	0	0	0	0	0	0	1	0	1	33.3333	0.303706	0
269	1	1	60	0	0	0	0	0	0	0	0	0	1	0	0	0	0	0	0	0	0	1	0	1	66.1378	0.545596	1
270	0	1	41	0	0	0	0	0	0	0	0	0	0	0	0	0	0	0	0	0	0	0	0	1	34.4444	0.311007	0
271	0	1	33	0	0	1	0	0	0	0	1	0	0	0	1	0	0	0	0	0	0	1	0	1	25.5556	0.255442	0
272	0	1	43	0	0	0	0	0	0	0	0	0	0	0	0	0	0	0	0	0	0	0	0	1	36.6667	0.325893	0
273	0	1	25	0	0	0	0	0	0	0	0	0	0	0	0	0	0	0	0	0	0	0	0	1	16.6667	0.206824	0
274	0	1	50	0	0	1	0	0	0	0	0	0	0	0	0	0	0	0	0	0	0	0	0	1	44.4444	0.380663	0
275	0	1	42	0	0	0	0	0	0	0	0	0	0	0	0	0	0	0	0	0	0	0	0	1	35.5556	0.318404	0
276	1	0	68	0	0	0	0	0	0	0	0	0	0	1	0	0	0	0	0	0	0	1	0	1	91.9604	0.727105	1
277	0	1	29	0	0	1	0	0	0	0	0	0	0	0	0	0	0	0	0	0	0	1	0	1	21.1111	0.230234	0
278	0	1	24	0	0	0	0	0	0	0	0	0	0	0	0	0	0	0	0	0	0	0	0	1	15.5556	0.201254	0
279	0	1	42	0	0	0	0	0	0	0	0	0	1	0	0	0	0	0	0	0	0	0	0	1	35.5556	0.318404	0
280	0	1	23	0	0	0	0	0	0	0	0	0	0	1	0	0	0	0	0	0	0	0	0	1	23.938	0.246062	0
281	0	1	38	1	1	0	0	0	0	0	1	0	0	0	0	0	0	0	0	0	0	1	0	1	31.1111	0.289398	0
282	0	1	43	0	0	0	0	0	0	0	0	0	0	0	0	0	0	0	0	0	0	0	0	1	36.6667	0.325893	0
283	0	1	38	1	0	0	0	0	0	0	1	0	0	0	1	0	0	0	0	0	0	1	0	1	31.1111	0.289398	0
284	1	1	33	1	0	0	0	0	0	0	0	0	0	0	0	0	0	0	0	0	0	0	0	1	36.1378	0.322317	0
285	0	1	30	0	0	0	0	0	0	0	0	0	0	1	0	0	0	0	0	0	0	0	0	1	31.7158	0.293251	0
286	0	1	33	0	0	0	0	0	0	0	0	0	0	0	0	0	0	0	0	0	0	0	0	1	25.5556	0.255442	0
287	1	0	29	0	0	1	0	0	0	0	0	0	0	0	0	0	0	0	0	0	0	0	0	1	39.1336	0.342838	0
288	1	0	59	0	0	0	0	0	0	0	0	0	0	1	0	0	0	0	1	0	0	0	0	1	81.9604	0.661795	1
289	0	0	47	0	0	0	0	0	0	0	0	0	0	1	0	0	0	0	0	0	0	0	0	1	58.0448	0.483276	1
290	1	0	75	1	1	0	1	0	1	1	0	0	0	0	0	0	0	0	0	0	0	1	1	1	152.884	0.945862	1
291	1	1	82	0	1	0	0	0	0	0	0	0	0	1	0	0	0	0	0	0	0	1	1	1	100.076	0.773904	1
292	0	0	26	1	0	0	1	0	0	0	0	0	0	1	0	0	0	0	0	0	0	0	0	1	34.7115	0.312776	0
293	1	0	33	0	0	1	0	0	0	0	0	0	1	0	0	0	0	0	0	0	0	1	0	1	43.578	0.374378	0
294	0	1	23	1	1	0	0	0	0	0	0	0	0	0	0	0	0	0	0	0	0	0	0	1	14.4444	0.195797	0
295	0	1	23	1	0	0	0	0	0	0	0	0	0	0	0	0	0	0	0	0	0	0	0	1	14.4444	0.195797	0
296	1	0	66	0	0	0	0	0	0	0	0	0	0	0	0	0	0	0	0	0	0	0	0	1	80.2447	0.649842	1
297	1	1	59	0	0	0	0	0	0	0	0	0	0	0	0	0	0	0	0	0	0	1	0	1	65.0267	0.537081	1
298	1	0	75	0	0	1	0	0	0	0	0	0	0	0	0	0	0	0	0	0	0	0	0	1	90.2447	0.716471	1
299	0	1	33	1	1	0	0	0	0	0	0	0	1	0	0	0	0	0	0	0	0	1	0	1	25.5556	0.255442	0
300	1	1	55	0	0	0	0	1	1	0	0	0	1	0	0	0	0	0	0	0	0	1	1	1	98.9726	0.76789	1
301	0	1	45	0	0	0	0	0	0	0	0	0	0	0	0	0	0	0	0	0	0	0	0	1	38.8889	0.341138	0
302	1	0	49	0	0	1	0	0	0	0	0	0	1	0	0	0	0	0	0	0	0	1	0	1	61.3558	0.50882	1
303	0	1	27	0	0	0	0	0	0	0	0	0	0	0	0	0	0	0	0	0	0	0	0	1	18.8889	0.218303	0
304	1	1	61	0	0	1	0	0	0	0	0	0	0	1	0	0	0	0	0	0	0	1	0	1	76.7425	0.624862	1
305	0	1	32	0	0	0	0	0	0	0	0	0	0	0	0	0	0	0	0	0	0	0	0	1	24.4444	0.248973	0
306	0	1	55	0	0	1	0	0	1	0	0	0	1	0	0	0	0	0	0	0	0	0	0	1	50	0.421834	1
307	0	0	50	0	0	0	0	0	0	0	0	0	0	0	0	0	0	0	0	0	0	1	0	1	51.8846	0.436083	1
308	1	0	46	0	0	0	0	0	0	0	0	0	0	0	0	0	0	0	0	0	0	0	0	1	58.0225	0.483104	1
309	0	1	40	0	0	0	0	0	0	0	0	0	0	0	0	0	0	0	0	0	0	1	0	1	33.3333	0.303706	0
310	1	1	69	1	1	0	1	0	0	0	0	0	0	0	0	0	0	0	0	0	0	1	1	1	76.1378	0.620477	1
311	1	0	65	0	0	1	0	0	0	0	0	0	0	0	0	0	0	0	0	0	0	0	0	1	79.1336	0.641998	1
312	1	1	43	0	0	0	0	0	0	0	0	0	0	0	0	0	0	0	0	0	0	1	0	1	47.2489	0.401272	1
313	1	1	50	0	0	1	0	0	0	0	0	0	1	1	0	0	0	0	0	0	0	0	0	1	64.5202	0.533192	1
314	0	1	25	0	0	0	0	0	0	0	1	0	0	0	0	0	0	0	0	0	0	0	0	1	16.6667	0.206824	0
315	0	0	46	0	0	0	0	0	0	0	0	0	0	1	0	0	0	0	0	0	0	0	0	1	56.9337	0.474717	1
316	1	1	40	0	0	1	0	0	0	0	0	0	0	0	1	0	0	0	0	0	0	1	0	1	43.9156	0.376822	0
317	1	0	77	0	0	0	0	0	0	0	0	0	0	0	0	0	0	0	0	0	0	1	0	1	92.4669	0.730196	1
318	0	1	32	0	0	0	0	0	0	0	0	0	0	0	0	0	0	0	0	0	0	0	0	1	24.4444	0.248973	0
319	0	0	38	0	0	1	0	0	0	0	0	0	0	0	0	0	0	0	0	0	0	0	0	1	38.5513	0.3388	0
320	1	1	21	1	0	0	0	0	0	0	1	0	0	0	0	0	0	0	0	0	0	1	0	1	22.8045	0.239628	0
321	0	1	34	0	0	1	0	0	0	0	0	0	0	0	0	0	0	0	0	0	0	1	0	1	26.6667	0.262019	0
322	0	1	40	0	0	0	0	0	0	0	0	0	1	0	0	0	0	0	0	0	0	1	0	1	33.3333	0.303706	0
323	0	1	37	0	0	0	0	0	0	0	0	0	0	0	0	0	0	0	0	0	0	0	0	1	30	0.282396	0
324	0	0	56	0	0	0	0	0	0	0	0	1	0	1	0	0	0	0	0	0	0	0	0	1	82.1677	0.663226	1
325	0	1	31	0	0	1	0	0	0	0	1	0	0	0	0	0	0	0	0	0	0	0	0	1	23.3333	0.242615	0
326	0	1	44	0	1	0	0	0	0	0	0	0	1	0	0	0	0	0	0	0	0	1	0	1	37.7778	0.333472	0
327	0	0	34	0	0	0	0	0	0	0	0	0	0	0	0	0	0	0	0	0	0	0	0	1	34.1069	0.308778	0
328	0	1	24	1	1	0	1	0	0	0	0	0	0	0	0	0	0	0	0	0	0	0	0	1	15.5556	0.201254	0
329	0	1	20	1	0	0	0	0	0	0	0	0	0	0	0	0	0	0	0	0	0	0	0	1	11.1111	0.1801	0
330	1	0	67	1	1	0	1	0	0	0	0	0	0	1	0	0	0	0	0	0	0	1	1	1	90.8493	0.720247	1
331	1	0	69	0	0	0	0	0	0	0	0	0	0	0	0	0	0	0	0	0	0	1	0	1	83.578	0.672879	1
332	1	1	65	0	0	0	0	0	0	1	0	0	0	0	0	0	0	0	0	0	0	1	1	1	134.333	0.907872	1
333	1	0	40	0	0	0	0	0	0	0	0	0	0	1	0	0	0	0	0	0	0	0	0	1	60.8493	0.504912	1
334	0	1	49	0	0	0	0	0	0	0	0	0	0	0	0	0	0	0	0	0	0	0	0	1	43.3333	0.37261	0
335	0	1	46	0	0	0	0	0	0	0	0	0	0	0	0	0	0	0	0	0	0	1	0	1	40	0.348889	0
336	0	1	48	0	0	1	0	0	0	0	0	0	0	0	0	0	0	0	0	0	0	1	0	1	42.2222	0.364628	0
337	0	1	35	0	0	0	0	0	0	0	0	0	0	0	0	0	0	0	0	0	0	0	0	1	27.7778	0.268705	0
338	0	1	25	0	0	0	0	0	0	0	1	0	0	0	0	0	0	0	0	0	0	0	0	1	16.6667	0.206824	0
339	1	1	41	0	0	0	0	0	0	0	0	0	0	0	0	0	0	0	0	0	0	0	0	1	45.0267	0.384909	1
340	0	1	36	1	1	0	0	0	0	0	0	0	0	0	0	0	0	0	0	0	0	0	0	1	28.8889	0.275498	0
341	0	1	49	0	0	0	0	0	0	0	0	0	0	0	0	0	0	0	0	0	0	1	0	1	43.3333	0.37261	0
342	0	1	36	1	1	0	1	0	0	0	0	0	0	0	0	0	0	0	0	0	0	1	0	1	28.8889	0.275498	0
343	1	1	30	0	0	1	0	0	0	0	0	0	0	0	0	0	0	0	0	0	0	0	0	1	32.8045	0.300265	0
344	0	1	31	0	0	0	0	0	0	0	0	0	0	0	0	0	0	0	0	0	0	0	0	1	23.3333	0.242615	0
345	0	0	23	0	0	0	0	0	0	0	0	0	0	0	0	0	0	0	0	0	0	1	0	1	21.8846	0.234493	0
346	0	1	49	0	1	0	0	0	0	0	0	0	0	0	0	0	0	0	0	0	0	0	0	1	43.3333	0.37261	0
347	0	1	22	0	0	0	0	0	0	0	0	0	0	0	0	0	0	0	0	0	0	0	0	1	13.3333	0.190453	0
348	0	0	26	0	0	1	0	0	0	0	0	0	1	0	0	0	0	0	0	0	0	0	0	1	25.218	0.253465	0
349	1	0	75	0	0	1	0	0	0	0	0	0	1	0	0	1	0	0	0	0	0	1	0	1	90.2447	0.716471	1
350	1	1	64	0	0	0	0	0	0	0	0	0	0	0	0	0	0	1	0	0	0	1	1	1	70.5823	0.579345	1
351	1	1	78	0	0	0	0	0	0	0	0	0	1	0	1	0	0	0	0	0	0	1	0	1	86.1378	0.690028	1
352	0	1	41	0	0	0	0	0	0	0	0	0	0	0	0	0	0	0	0	0	0	1	0	1	34.4444	0.311007	0
353	0	1	42	0	1	0	0	0	0	0	0	1	0	0	0	0	0	0	0	0	0	1	0	1	49.6784	0.419415	1
354	1	0	51	0	0	1	0	0	0	0	0	0	0	0	0	0	0	0	0	0	0	0	0	1	63.578	0.525946	1
355	1	1	46	0	0	0	0	0	0	0	0	0	0	0	1	0	0	1	0	0	0	0	0	1	50.5823	0.426224	1
356	1	0	68	1	0	0	0	0	0	0	0	0	0	0	0	0	0	0	0	0	0	1	0	1	82.4669	0.665285	1
357	1	0	60	0	0	0	0	0	0	0	0	0	1	1	0	0	0	0	0	0	0	1	0	1	83.0715	0.669429	1
358	0	1	52	0	0	1	0	0	0	0	0	0	0	0	0	0	0	0	0	0	0	0	0	1	46.6667	0.396962	1
359	1	0	28	0	0	0	0	0	0	0	0	0	0	0	0	0	0	0	0	0	0	0	0	1	38.0225	0.335153	0
360	1	1	31	1	1	0	1	0	0	0	1	0	0	0	0	0	0	0	0	0	0	0	0	1	33.9156	0.30752	0
361	0	1	25	0	0	0	0	0	0	0	0	0	0	0	0	0	0	0	0	0	0	0	0	1	16.6667	0.206824	0
362	1	1	17	1	1	0	1	0	0	0	0	1	0	0	0	0	0	0	0	0	0	0	0	1	32.4829	0.298183	0
363	1	0	26	0	0	1	0	0	0	0	0	0	0	0	0	0	0	0	0	0	0	0	0	1	35.8002	0.320045	0
364	0	1	53	0	0	0	0	0	0	0	0	0	0	0	0	0	0	0	0	0	0	0	0	1	47.7778	0.4052	1
365	1	0	73	0	0	0	0	0	0	0	0	0	0	0	0	0	0	0	0	0	0	1	0	1	88.0225	0.702332	1
366	1	0	63	0	0	0	0	0	1	0	0	1	0	0	1	0	0	0	0	0	0	0	0	1	91.0342	0.721395	1
367	0	0	49	0	0	0	0	0	0	0	0	0	0	1	0	0	0	0	0	0	0	0	0	1	60.2671	0.500419	1
368	0	1	39	0	0	0	0	0	0	0	0	0	0	0	0	0	0	0	0	0	0	0	0	1	32.2222	0.296502	0
369	0	1	35	1	0	0	0	0	0	0	0	0	0	0	0	0	0	0	0	0	0	0	0	1	27.7778	0.268705	0
370	0	1	46	0	1	0	0	0	0	0	0	0	1	1	0	0	0	0	0	0	0	1	0	1	49.4935	0.418026	1
371	1	1	17	0	0	0	0	0	0	0	1	0	0	0	0	0	0	0	0	0	0	1	0	1	18.36	0.21553	0
372	0	1	32	0	0	0	0	0	0	0	0	0	0	0	0	0	0	0	0	0	0	0	0	1	24.4444	0.248973	0
373	0	1	76	0	0	1	0	0	0	0	0	0	0	0	1	0	0	0	0	0	0	1	0	1	73.3333	0.599889	1
374	0	1	22	1	1	0	0	0	0	0	0	0	1	1	0	0	0	0	0	0	0	0	0	1	22.8269	0.239754	0
375	1	1	68	0	0	0	0	0	0	0	0	0	0	0	0	0	0	0	0	0	0	1	0	1	75.0267	0.612367	1
376	0	1	18	0	0	0	0	0	0	0	0	0	0	0	0	0	0	0	0	0	0	0	0	1	8.88889	0.170193	0
377	1	0	80	0	0	0	0	0	0	0	0	0	0	1	0	0	0	0	0	1	0	1	1	1	105.294	0.800841	1
378	0	1	25	1	1	0	1	0	0	0	0	0	0	0	0	0	0	0	0	0	0	0	0	1	16.6667	0.206824	0
379	0	1	27	1	0	0	0	0	0	0	0	0	0	0	0	0	0	0	0	0	0	0	0	1	18.8889	0.218303	0
380	0	1	25	0	0	0	0	0	0	0	0	0	0	0	0	0	0	0	0	0	0	0	0	1	16.6667	0.206824	0
381	0	1	32	0	0	0	0	0	0	0	0	0	0	0	0	0	0	0	0	0	0	0	0	1	24.4444	0.248973	0
382	0	1	33	0	0	0	0	0	0	0	0	0	0	0	0	0	0	0	0	0	0	0	0	1	25.5556	0.255442	0
383	1	0	26	0	0	1	0	0	0	0	0	0	0	0	0	0	0	0	0	0	0	0	0	1	35.8002	0.320045	0
384	0	1	36	0	0	0	1	0	0	0	0	0	0	0	0	0	0	0	0	0	0	1	0	1	28.8889	0.275498	0
385	0	1	35	0	0	1	0	0	0	0	0	0	0	0	0	0	0	0	0	0	0	0	0	1	27.7778	0.268705	0
386	1	0	49	0	0	1	0	0	0	0	0	0	0	1	0	0	0	0	0	0	0	0	0	1	70.8493	0.581352	1
387	1	1	54	1	1	0	1	0	0	0	0	0	0	0	1	0	0	0	0	0	0	1	1	1	59.4711	0.494277	1
388	1	1	37	0	0	0	0	0	0	0	0	0	0	0	0	0	0	0	0	0	0	0	0	1	40.5823	0.352983	0
389	0	1	31	0	0	0	0	0	0	0	1	0	0	0	0	0	0	0	0	0	0	1	0	1	23.3333	0.242615	0
390	0	1	25	1	0	0	0	0	0	0	0	0	0	0	0	0	0	0	0	0	0	1	0	1	16.6667	0.206824	0
391	0	1	56	1	1	0	1	0	0	0	0	0	0	1	0	0	0	0	0	0	0	1	1	1	60.6046	0.503024	1
392	0	1	54	0	0	0	1	0	0	0	0	0	1	0	0	0	0	0	0	0	0	1	0	1	48.8889	0.413493	1
393	1	1	79	0	0	0	0	0	1	0	0	0	0	0	0	1	1	0	0	0	0	1	0	1	87.2489	0.697316	1
394	0	1	42	0	0	0	0	0	0	0	0	0	0	0	0	0	0	0	0	0	0	1	0	1	35.5556	0.318404	0
395	0	1	30	0	1	0	0	0	0	0	0	0	0	0	0	0	0	0	0	0	0	0	0	1	22.2222	0.236369	0
396	1	1	63	1	0	0	0	0	0	0	0	1	0	0	0	0	0	0	0	0	0	0	0	1	83.594	0.672988	1
397	0	1	32	0	1	0	0	0	0	0	0	0	0	0	0	0	0	0	0	0	0	1	0	1	24.4444	0.248973	0
398	0	1	35	0	0	0	0	0	0	0	0	0	0	0	0	0	0	0	0	0	0	0	0	1	27.7778	0.268705	0
399	1	1	80	0	0	0	0	0	0	0	0	0	0	0	0	0	0	0	0	0	0	0	0	1	88.36	0.704506	1
400	0	1	33	0	0	0	0	0	0	0	0	0	0	0	0	0	0	0	0	0	0	1	0	1	25.5556	0.255442	0
401	1	1	51	0	0	0	0	0	0	0	0	0	0	0	0	0	0	0	0	0	1	1	0	1	56.1378	0.468595	1
402	1	0	29	0	0	0	0	0	0	0	0	0	0	0	0	0	0	0	0	0	0	0	0	1	39.1336	0.342838	0
403	1	0	35	0	0	0	0	0	0	0	0	0	0	0	0	0	0	0	0	0	0	1	0	1	45.8002	0.390577	1
404	0	1	38	0	0	0	0	0	0	0	0	0	0	0	0	0	0	0	0	0	0	1	0	1	31.1111	0.289398	0
405	0	0	44	0	0	0	0	0	0	0	0	0	0	0	0	0	0	0	0	0	0	0	0	1	45.218	0.386308	1
406	0	1	31	1	1	0	1	0	0	0	0	0	0	0	0	0	0	0	0	0	0	0	0	1	23.3333	0.242615	0
407	0	1	46	0	0	0	0	0	0	0	0	0	0	0	0	0	0	0	0	0	0	0	0	1	40	0.348889	0
408	1	0	52	0	0	0	0	0	0	0	0	1	0	0	0	0	0	0	0	0	0	1	0	1	78.812	0.639713	1
409	0	1	37	0	0	0	1	0	0	0	0	0	0	0	0	0	0	0	0	0	0	0	0	1	30	0.282396	0
410	0	1	47	0	0	0	0	0	0	0	0	0	1	0	1	0	0	0	0	0	0	1	0	1	41.1111	0.35672	0
411	0	1	21	0	0	0	0	0	0	0	0	0	0	0	0	0	0	0	0	0	0	0	0	1	12.2222	0.185221	0
412	1	1	41	0	0	0	0	0	0	0	0	0	1	0	0	0	0	0	0	0	0	0	0	1	45.0267	0.384909	1
413	1	1	83	1	1	0	1	0	1	0	0	0	0	0	0	0	0	0	0	0	0	0	0	1	91.6934	0.725466	1
414	0	1	27	1	1	0	1	0	0	0	0	0	0	0	0	0	0	0	0	0	0	1	0	1	18.8889	0.218303	0
415	1	0	31	0	0	1	0	1	1	0	0	0	1	0	0	0	0	0	0	0	0	1	0	1	79.7461	0.646332	1
416	0	1	48	1	1	0	1	0	0	0	0	0	0	1	0	0	0	0	0	0	0	0	0	1	51.7158	0.434802	1
417	0	1	19	0	0	0	0	0	0	0	0	0	0	0	0	0	0	0	0	0	0	0	0	1	10	0.175091	0
418	0	1	31	0	0	0	0	0	0	0	0	0	0	0	0	0	0	0	0	0	0	1	0	1	23.3333	0.242615	0
419	0	1	30	1	0	0	0	0	0	0	0	0	1	0	0	0	0	0	0	0	0	0	0	1	22.2222	0.236369	0
420	1	0	33	0	0	0	0	0	0	0	1	0	0	0	0	0	0	0	0	0	0	0	0	1	43.578	0.374378	0
421	1	0	27	0	0	0	0	0	0	0	0	0	0	0	0	0	0	0	0	0	0	1	0	1	36.9113	0.327554	0
422	1	0	22	0	0	0	0	0	0	0	0	0	0	0	0	0	0	0	0	0	0	0	0	1	31.3558	0.290954	0
423	0	1	59	0	0	0	0	0	0	0	0	0	0	0	0	0	0	0	0	0	0	1	0	1	54.4444	0.455603	1
424	1	1	57	0	0	0	0	0	0	0	0	0	0	1	0	0	0	0	0	0	0	1	0	1	72.298	0.592195	1
425	0	1	23	0	0	0	0	0	0	0	0	0	0	0	0	0	0	0	0	0	0	1	0	1	14.4444	0.195797	0
426	1	0	47	0	0	0	0	0	0	0	0	1	0	1	0	0	0	0	0	0	0	1	0	1	82.75	0.667228	1
427	0	1	34	1	1	0	1	0	0	0	0	0	1	0	0	0	0	0	0	0	0	1	0	1	26.6667	0.262019	0
428	0	1	30	0	0	0	0	0	0	0	0	0	0	0	0	0	0	0	0	0	0	0	0	1	22.2222	0.236369	0
429	1	0	33	1	0	1	0	0	1	0	0	0	0	0	0	0	0	0	0	0	0	0	0	1	43.578	0.374378	0
430	0	0	25	0	0	0	0	0	0	0	1	0	0	0	0	0	0	0	0	0	0	0	0	1	24.1069	0.24703	0
431	0	0	21	1	0	0	0	0	0	0	0	0	0	0	0	0	0	0	0	0	0	0	0	1	19.6624	0.222405	0
432	0	1	20	0	0	1	0	0	0	0	1	0	0	0	0	0	0	0	0	0	0	0	0	1	11.1111	0.1801	0
433	0	1	34	0	0	0	0	0	0	0	1	0	0	1	0	0	0	0	0	0	0	0	0	1	36.1602	0.322468	0
434	1	1	16	0	0	0	0	0	0	0	0	0	1	0	0	0	0	0	0	0	0	0	0	1	17.2489	0.209788	0
435	1	1	72	0	0	0	0	0	1	0	0	0	0	0	0	0	0	0	0	0	0	0	0	1	79.4711	0.644389	1
436	0	0	22	0	0	0	0	0	0	0	1	0	0	0	0	0	0	0	0	0	0	0	0	1	20.7735	0.228393	0
437	0	0	30	0	0	0	0	0	0	0	0	0	0	1	0	0	0	0	0	0	0	1	0	1	39.156	0.342994	0
438	1	0	31	0	0	1	0	1	1	0	0	0	0	0	0	0	0	0	0	0	0	0	0	1	79.7461	0.646332	1
439	0	1	31	0	0	0	0	0	0	0	0	0	0	1	0	0	0	0	0	0	0	0	0	1	32.8269	0.30041	0
440	0	1	23	0	0	0	0	0	0	0	0	0	1	0	0	0	0	0	0	0	0	0	0	1	14.4444	0.195797	0
441	0	1	46	1	0	0	1	0	0	0	0	0	0	1	0	0	0	0	0	0	0	1	0	1	49.4935	0.418026	1
442	0	1	26	0	0	0	0	0	0	0	0	0	0	0	0	0	0	0	0	0	0	0	0	1	17.7778	0.212507	0
443	0	1	40	0	0	0	0	0	0	0	0	0	0	0	0	0	0	0	0	0	0	0	0	1	33.3333	0.303706	0
444	0	1	32	0	0	0	0	0	0	0	0	0	0	0	0	0	0	0	0	0	0	0	0	1	24.4444	0.248973	0
445	1	1	56	0	0	0	0	0	0	0	0	0	0	0	1	0	0	0	0	0	0	1	1	1	61.6934	0.511424	1
446	1	1	21	0	0	0	0	0	0	0	1	0	0	0	0	0	0	0	0	0	0	0	0	1	22.8045	0.239628	0
447	0	1	19	1	1	0	1	0	0	0	1	0	0	0	0	0	0	0	0	0	0	1	0	1	10	0.175091	0
448	1	1	42	1	1	0	1	0	0	0	0	0	0	0	0	0	0	0	1	0	0	1	1	1	46.1378	0.39306	1
449	1	0	73	0	0	0	0	0	0	1	0	0	0	1	0	0	0	1	0	0	0	1	1	1	160.155	0.956271	1
450	0	1	22	0	1	0	0	0	0	0	0	0	0	0	0	0	0	0	0	0	0	0	0	1	13.3333	0.190453	0
451	1	0	58	0	0	0	0	0	0	0	0	0	0	0	1	0	0	0	0	0	0	0	0	1	71.3558	0.585152	1
452	0	1	33	0	0	0	0	0	0	0	1	0	0	0	0	0	0	0	0	0	0	0	0	1	25.5556	0.255442	0
453	1	0	77	0	0	0	0	0	0	0	0	0	0	0	0	0	0	0	0	0	1	0	0	1	92.4669	0.730196	1
454	0	0	25	0	0	1	0	0	0	0	0	0	0	0	0	0	0	0	0	0	0	0	0	1	24.1069	0.24703	0
455	0	1	54	0	0	0	0	0	0	0	0	0	0	0	0	0	0	0	0	0	0	0	0	1	48.8889	0.413493	1
456	0	1	29	0	0	0	0	0	0	0	0	0	0	0	0	0	0	0	0	0	0	1	0	1	21.1111	0.230234	0
457	0	1	55	0	0	0	0	0	0	0	1	0	0	0	0	0	0	0	0	0	0	0	0	1	50	0.421834	1
458	0	1	22	0	0	0	0	0	0	0	1	0	0	0	0	0	0	0	0	0	0	0	0	1	13.3333	0.190453	0
459	0	1	31	1	1	0	1	0	0	0	0	0	0	0	0	0	0	0	0	0	0	0	0	1	23.3333	0.242615	0
460	1	1	73	0	0	0	0	0	0	0	0	0	0	1	0	0	0	0	0	0	0	0	0	1	90.0758	0.715411	1
461	0	1	31	0	0	1	0	0	0	0	0	0	0	0	0	0	0	0	0	0	0	0	0	1	23.3333	0.242615	0
462	0	1	23	1	0	0	0	0	0	0	0	0	0	0	0	0	0	0	0	0	0	0	0	1	14.4444	0.195797	0
463	0	1	63	0	0	0	0	0	0	0	0	1	0	1	0	0	0	0	0	0	0	0	0	1	82.5053	0.665549	1
464	0	1	32	0	0	0	0	0	0	0	0	0	0	0	0	0	0	0	0	0	0	0	0	1	24.4444	0.248973	0
465	0	0	40	0	0	1	0	0	0	0	0	0	0	0	0	0	0	0	0	0	0	0	0	1	40.7735	0.354332	0
466	1	1	65	0	0	1	0	0	0	0	0	0	0	0	0	0	0	0	0	0	0	0	0	1	71.6934	0.58768	1
467	0	1	26	0	0	0	0	0	0	0	0	0	0	0	0	0	0	0	0	0	0	0	0	1	17.7778	0.212507	0
468	0	1	27	0	0	0	1	0	0	0	0	0	0	0	0	0	0	0	0	0	0	0	0	1	18.8889	0.218303	0
469	1	1	23	0	0	0	0	0	0	0	0	0	0	0	0	0	0	0	0	0	0	0	0	1	25.0267	0.252349	0
470	1	0	65	0	1	0	0	0	0	0	0	1	0	0	0	0	0	0	0	0	0	1	1	1	93.2564	0.73497	1
471	1	0	47	0	0	0	0	0	0	0	0	0	0	1	0	0	0	0	0	0	0	1	0	1	68.6271	0.56457	1
472	0	1	48	0	0	0	0	0	0	0	1	0	0	0	0	0	0	0	0	0	0	0	0	1	42.2222	0.364628	0
473	1	0	53	0	0	1	0	0	0	0	0	0	1	0	0	0	0	0	0	0	0	1	0	1	65.8002	0.543012	1
474	0	0	21	0	0	0	0	0	0	0	0	1	0	0	0	0	0	0	0	0	0	0	0	1	33.7853	0.306664	0
475	0	1	21	0	0	1	0	0	0	0	0	0	0	0	0	0	0	0	0	0	0	1	0	1	12.2222	0.185221	0
476	0	1	34	0	0	0	1	0	0	0	0	0	0	0	0	0	0	0	0	0	0	0	0	1	26.6667	0.262019	0
477	0	1	58	0	0	1	0	0	0	0	0	0	0	0	0	0	0	0	0	0	0	0	0	1	53.3333	0.44711	1
478	1	1	31	0	0	1	0	0	0	0	0	0	1	0	0	0	0	0	0	0	0	0	0	1	33.9156	0.30752	0
479	0	1	21	1	1	0	1	0	0	0	1	0	0	0	0	0	0	0	0	0	0	0	0	1	12.2222	0.185221	0
480	1	0	77	0	0	0	0	0	0	0	0	0	0	1	0	0	0	0	0	0	0	1	0	1	101.96	0.783921	1
481	0	1	30	0	1	0	0	0	0	0	0	0	0	0	0	0	0	0	0	0	0	0	0	1	22.2222	0.236369	0
482	1	1	47	0	0	0	0	0	0	0	0	0	0	0	0	0	0	0	0	0	0	1	0	1	51.6934	0.434632	1
483	1	1	49	0	0	0	0	0	0	1	0	0	0	0	0	0	0	0	0	0	0	1	0	1	116.555	0.850581	1
484	0	1	22	1	0	0	0	0	0	0	0	0	0	0	0	0	0	0	0	0	0	0	0	1	13.3333	0.190453	0
485	1	1	70	0	0	1	0	0	0	0	0	0	0	0	0	0	0	0	0	0	0	0	0	1	77.2489	0.628519	1
486	0	1	29	0	0	0	0	0	0	0	0	0	0	0	0	0	0	0	0	0	0	0	0	1	21.1111	0.230234	0
487	1	1	48	0	0	0	0	0	0	0	0	0	0	0	0	0	0	0	0	0	0	1	1	1	52.8045	0.443078	1
488	0	1	49	0	0	1	0	0	0	0	0	0	0	0	0	0	0	0	0	0	0	0	0	1	43.3333	0.37261	0
489	0	1	29	0	0	0	0	0	0	0	0	0	0	0	0	0	0	0	0	0	0	0	0	1	21.1111	0.230234	0
490	1	0	46	0	0	0	0	0	0	0	0	0	0	1	0	0	0	0	0	0	0	0	0	1	67.516	0.556121	1
491	0	1	33	0	0	0	0	0	0	0	0	0	0	0	0	0	0	0	0	0	0	0	0	1	25.5556	0.255442	0
492	0	1	21	0	1	0	0	0	0	0	0	0	0	0	0	0	0	0	0	0	0	0	0	1	12.2222	0.185221	0
493	0	1	31	1	0	0	1	0	0	0	0	0	0	0	0	0	0	0	0	0	0	0	0	1	23.3333	0.242615	0
494	0	1	27	0	0	0	0	0	0	0	0	0	0	1	0	0	0	0	0	0	0	0	0	1	28.3824	0.272388	0
495	0	1	43	0	0	0	0	0	0	0	0	0	0	0	0	0	0	0	0	1	0	0	0	1	36.6667	0.325893	0
496	0	1	52	0	0	1	0	0	0	0	0	1	0	0	1	0	0	0	0	0	0	0	0	1	60.7895	0.50445	1
497	1	0	52	0	0	0	0	0	0	0	0	1	0	0	0	0	0	0	0	0	0	0	0	1	78.812	0.639713	1
498	1	1	78	1	0	0	0	0	0	0	0	0	0	1	0	0	0	0	0	0	0	1	0	1	95.6313	0.749002	1
499	0	1	23	1	0	0	0	0	0	0	1	0	0	0	0	0	0	0	0	0	0	1	0	1	14.4444	0.195797	0
500	0	1	30	1	1	0	1	0	0	0	0	0	0	0	0	0	0	0	0	0	0	0	0	1	22.2222	0.236369	0
501	0	1	42	0	0	0	0	0	0	0	0	0	0	0	0	0	0	0	0	0	0	0	0	1	35.5556	0.318404	0
502	1	0	92	0	0	0	0	0	0	0	0	0	0	1	0	0	0	0	0	0	0	1	0	1	118.627	0.858529	1
503	1	1	58	0	0	0	1	0	0	0	0	0	0	0	0	0	0	0	0	0	0	0	0	1	63.9156	0.528543	1
504	0	1	41	0	0	0	0	0	0	0	0	0	0	0	0	0	0	0	0	0	0	1	0	1	34.4444	0.311007	0
505	0	1	26	0	0	0	0	0	0	0	0	0	0	0	0	0	0	0	0	0	0	0	0	1	17.7778	0.212507	0
506	0	1	33	1	1	0	1	0	0	0	0	1	0	0	0	0	0	0	0	0	0	0	0	1	39.6784	0.346637	0
507	0	1	22	1	0	0	0	0	0	0	1	0	0	0	0	0	0	0	0	0	0	0	0	1	13.3333	0.190453	0
508	0	1	30	0	0	0	0	0	0	0	0	0	0	0	0	0	0	0	0	0	0	0	0	1	22.2222	0.236369	0
509	0	1	48	0	0	0	0	0	0	0	0	0	0	0	0	0	0	0	0	0	0	0	0	1	42.2222	0.364628	0
510	0	1	28	0	0	0	0	0	0	0	0	0	0	0	0	0	0	0	0	0	0	0	0	1	20	0.224212	0
511	0	1	33	1	1	0	1	0	0	0	0	0	0	0	0	0	0	0	0	0	0	1	0	1	25.5556	0.255442	0
512	0	1	19	1	1	0	1	0	0	0	0	1	0	0	0	0	0	0	0	0	0	0	0	1	24.1228	0.247122	0
513	0	1	45	0	0	0	0	0	0	0	0	0	0	0	0	0	0	0	0	0	0	1	0	1	38.8889	0.341138	0
514	0	0	52	0	0	0	0	0	0	0	0	0	0	1	0	0	0	0	0	0	0	1	0	1	63.6004	0.526118	1
515	1	1	61	0	0	0	0	0	0	0	0	0	0	0	0	0	0	0	0	0	0	0	0	1	67.2489	0.554085	1
516	0	1	22	0	0	0	0	0	0	0	0	0	0	0	0	0	0	0	0	0	0	0	0	1	13.3333	0.190453	0
517	0	1	48	1	1	0	0	0	0	0	0	0	0	0	0	0	0	0	0	0	0	0	0	1	42.2222	0.364628	0
518	1	1	76	0	0	0	0	0	0	0	0	0	0	1	0	0	0	0	0	0	0	1	1	1	93.4091	0.735888	1
519	0	0	51	0	0	0	0	0	0	0	0	0	0	0	1	0	0	0	0	0	0	1	0	1	52.9957	0.444535	1
520	0	1	23	0	0	0	0	0	0	0	0	0	0	0	0	0	0	0	0	0	0	0	0	1	14.4444	0.195797	0
521	0	1	22	0	1	0	0	0	0	0	0	0	0	0	0	0	0	0	0	0	0	0	0	1	13.3333	0.190453	0
522	1	0	77	0	0	1	0	0	0	0	0	0	1	0	0	0	0	0	0	0	0	1	1	1	92.4669	0.730196	1
523	0	0	49	0	0	0	0	0	0	0	0	0	0	0	0	0	0	0	0	0	0	0	0	1	50.7735	0.427668	1
524	1	1	23	0	0	0	1	0	0	0	1	0	0	1	1	0	0	0	0	0	0	1	0	1	34.5202	0.311509	0
525	1	0	69	0	0	0	0	0	0	0	0	0	0	0	0	0	0	0	0	0	0	0	0	1	83.578	0.672879	1
526	0	1	43	0	0	0	0	0	0	0	0	0	0	0	0	0	0	0	0	0	0	0	0	1	36.6667	0.325893	0
527	0	0	46	0	0	0	0	0	0	0	0	0	0	0	0	0	0	0	0	0	0	0	0	1	47.4402	0.402691	1
528	1	1	61	0	0	0	0	0	0	0	0	1	0	1	0	0	0	0	0	0	0	1	0	1	90.8653	0.720346	1
529	1	1	42	0	0	0	0	0	0	0	0	0	1	0	0	0	0	0	0	0	0	1	1	1	46.1378	0.39306	1
530	1	0	53	0	0	1	0	0	0	0	0	0	0	0	0	0	0	0	0	0	0	0	0	1	65.8002	0.543012	1
531	0	1	42	0	0	0	0	0	0	0	0	0	0	0	0	0	0	0	0	0	0	0	0	1	35.5556	0.318404	0
532	1	0	59	0	0	0	0	0	0	0	0	0	0	1	0	0	0	0	0	0	0	1	1	1	81.9604	0.661795	1
533	0	1	23	0	0	0	1	0	0	0	0	0	0	0	0	0	0	0	0	0	0	0	0	1	14.4444	0.195797	0
534	0	1	18	0	0	0	0	0	0	0	0	0	0	0	0	0	0	0	0	0	0	0	0	1	8.88889	0.170193	0
535	0	1	28	0	0	0	0	0	0	0	0	0	0	0	0	0	0	0	0	0	0	1	0	1	20	0.224212	0
536	0	1	22	0	0	0	0	0	0	0	1	0	0	0	0	0	0	0	0	0	0	0	0	1	13.3333	0.190453	0
537	0	1	21	0	1	0	0	0	0	0	0	0	0	0	0	0	0	0	0	0	0	0	0	1	12.2222	0.185221	0
538	0	1	32	0	0	0	0	0	0	0	0	0	0	0	0	0	0	0	0	0	0	0	0	1	24.4444	0.248973	0
539	1	0	61	0	0	0	0	0	0	0	0	0	0	0	0	0	0	0	0	0	0	0	0	1	74.6891	0.609891	1
540	0	1	55	0	0	0	0	0	0	0	0	0	0	0	1	0	0	0	0	0	0	1	0	1	50	0.421834	1
541	0	1	23	1	0	0	0	0	0	0	0	0	1	0	0	0	0	0	0	0	0	0	0	1	14.4444	0.195797	0
542	0	1	28	0	0	0	0	0	0	0	0	0	1	0	0	0	0	0	0	0	0	0	0	1	20	0.224212	0
543	0	1	34	0	0	0	0	0	0	0	0	0	0	1	0	0	0	0	0	0	0	0	0	1	36.1602	0.322468	0
544	0	1	53	1	1	0	1	0	1	0	0	0	0	0	0	0	0	0	0	0	0	1	0	1	47.7778	0.4052	1
545	1	0	78	0	0	0	0	0	0	1	0	0	0	1	0	0	0	0	0	0	0	1	1	1	165.711	0.962906	1
546	1	0	55	0	0	0	0	0	0	0	0	1	0	0	0	0	0	0	1	0	0	1	1	1	82.1453	0.663071	1
547	1	0	76	1	0	0	0	0	0	0	0	0	0	0	0	0	0	0	0	0	0	1	1	1	91.3558	0.723386	1
548	0	1	34	0	0	0	0	0	0	0	0	0	0	0	0	0	0	0	0	0	0	0	0	1	26.6667	0.262019	0
549	1	1	26	0	0	0	0	0	0	0	0	0	0	1	0	0	0	0	0	0	0	0	0	1	37.8536	0.333992	0
550	0	1	23	0	0	0	0	0	0	0	0	0	0	0	0	0	0	0	0	0	0	0	0	1	14.4444	0.195797	0
551	1	1	42	0	0	0	1	0	0	0	0	0	0	0	0	0	0	0	0	0	0	1	1	1	46.1378	0.39306	1
552	0	1	59	0	0	0	0	0	0	0	0	0	0	0	0	0	0	0	0	0	0	1	0	1	54.4444	0.455603	1
553	0	1	33	0	0	0	0	0	0	0	0	0	1	1	0	0	0	0	0	0	0	1	0	1	35.0491	0.31502	0
554	0	1	45	0	0	0	0	0	0	0	0	0	0	0	0	0	0	0	0	0	0	0	0	1	38.8889	0.341138	0
555	0	1	24	0	0	0	0	0	0	0	0	0	0	0	0	0	0	0	0	0	0	0	0	1	15.5556	0.201254	0
556	1	0	34	0	0	1	0	0	0	0	0	0	0	1	0	0	0	0	0	0	0	1	0	1	54.1827	0.453599	1
557	1	1	75	0	0	0	0	0	0	0	0	0	0	0	0	0	0	0	0	0	1	0	0	1	82.8045	0.667602	1
558	1	1	25	0	0	1	0	0	0	0	0	0	1	0	0	0	0	0	0	0	0	0	0	1	27.2489	0.265509	0
559	0	1	30	0	1	0	0	0	0	0	0	0	0	0	0	0	0	0	0	0	0	0	0	1	22.2222	0.236369	0
560	0	1	73	0	0	0	0	0	0	0	0	0	0	0	0	0	0	0	0	0	0	1	0	1	70	0.574958	1
561	1	0	73	0	0	0	0	0	0	0	0	0	0	0	0	0	0	1	0	0	0	1	0	1	88.0225	0.702332	1
562	0	1	33	0	0	0	0	0	0	0	0	0	0	0	0	0	0	0	0	0	0	0	0	1	25.5556	0.255442	0
563	1	0	72	1	0	0	0	0	0	0	1	0	0	0	0	0	0	0	0	0	0	1	0	1	86.9113	0.695112	1
564	0	1	48	0	0	0	1	0	0	0	0	0	0	0	0	0	0	0	0	0	0	0	0	1	42.2222	0.364628	0
565	1	1	54	1	0	0	0	0	0	0	0	0	0	0	0	0	0	0	0	0	1	0	0	1	59.4711	0.494277	1
566	1	0	51	0	0	0	0	0	0	0	0	0	0	0	0	0	0	0	1	0	0	1	1	1	63.578	0.525946	1
567	0	1	52	1	1	0	1	0	0	0	0	0	0	0	0	0	0	0	0	0	0	1	0	1	46.6667	0.396962	1
568	0	0	50	0	0	1	0	0	0	0	0	0	1	0	0	0	0	0	0	0	0	0	0	1	51.8846	0.436083	1
569	1	0	31	0	0	0	0	0	0	0	0	0	0	0	0	0	0	0	0	0	0	0	0	1	41.3558	0.358455	0
570	1	0	46	1	1	0	1	0	0	0	0	0	0	1	0	0	0	0	0	0	0	1	1	1	67.516	0.556121	1
571	0	1	26	1	1	0	1	0	0	0	0	0	0	0	0	0	0	0	0	0	0	1	0	1	17.7778	0.212507	0
572	1	0	66	0	0	1	0	0	0	0	0	0	0	0	0	0	0	0	0	0	0	1	0	1	80.2447	0.649842	1
573	0	1	31	1	1	0	0	0	0	0	0	0	0	0	0	0	0	0	0	0	0	0	0	1	23.3333	0.242615	0
574	0	1	31	0	0	0	0	0	0	0	0	0	0	0	0	0	0	0	0	0	0	0	0	1	23.3333	0.242615	0
575	0	1	43	0	0	0	0	0	0	0	0	0	0	1	0	0	0	0	0	0	0	0	0	1	46.1602	0.393225	1
576	0	1	36	0	0	0	0	0	0	0	0	0	0	0	0	0	0	0	0	0	0	0	0	1	28.8889	0.275498	0
577	0	0	35	0	0	0	0	0	0	0	0	0	0	1	0	0	0	0	0	0	0	0	0	1	44.7115	0.382608	0
578	0	0	25	0	0	1	0	0	0	0	0	0	1	0	0	0	0	0	0	0	0	0	0	1	24.1069	0.24703	0
579	1	0	49	0	0	1	0	0	0	0	0	0	0	0	0	0	0	0	0	0	0	1	0	1	61.3558	0.50882	1
580	1	1	35	0	0	0	0	0	1	0	0	0	0	0	0	0	0	0	0	0	0	1	0	1	38.36	0.337479	0
581	0	1	35	0	0	0	0	0	0	0	0	0	0	0	0	0	0	0	0	0	0	0	0	1	27.7778	0.268705	0
582	1	1	74	0	0	0	0	0	0	0	0	0	0	0	0	0	0	0	1	0	0	1	1	1	81.6934	0.659948	1
583	0	1	25	0	0	0	0	0	0	0	0	0	1	0	0	0	0	0	0	0	0	0	0	1	16.6667	0.206824	0
584	1	0	80	0	0	0	0	0	0	0	1	0	0	0	0	1	0	0	0	0	0	1	0	1	95.8002	0.749981	1
585	0	1	22	0	0	0	0	0	1	0	0	0	0	0	0	0	0	0	0	0	0	0	0	1	13.3333	0.190453	0
586	1	1	56	0	0	0	0	0	0	0	1	0	0	0	1	0	0	0	0	0	0	1	0	1	61.6934	0.511424	1
587	1	1	35	0	0	0	0	0	0	0	0	0	0	0	0	0	0	0	0	0	0	0	0	1	38.36	0.337479	0
588	0	1	41	1	1	0	0	0	0	0	0	0	0	0	0	0	0	0	0	0	0	0	0	1	34.4444	0.311007	0
589	0	1	47	1	0	0	0	0	0	0	1	0	0	0	0	0	0	0	0	0	0	0	0	1	41.1111	0.35672	0
590	0	1	34	0	0	0	0	0	0	0	0	0	0	0	0	0	0	0	0	0	0	0	0	1	26.6667	0.262019	0
591	0	1	29	0	1	0	0	0	0	0	0	0	0	0	0	0	0	0	0	0	0	0	0	1	21.1111	0.230234	0
592	1	0	64	0	0	1	0	0	0	0	0	0	0	0	0	0	0	0	0	0	0	0	0	1	78.0225	0.634077	1
593	1	1	77	0	0	0	0	0	0	0	0	0	0	0	0	0	0	0	1	0	0	1	1	1	85.0267	0.682645	1
594	0	1	29	0	0	0	0	0	0	0	0	0	0	0	0	0	0	0	0	0	0	0	0	1	21.1111	0.230234	0
595	1	0	60	0	0	0	0	0	0	0	0	0	0	0	0	0	0	0	0	0	0	1	0	1	73.578	0.601701	1
596	0	0	30	1	0	0	1	0	0	0	0	0	0	0	0	0	0	0	0	0	0	0	0	1	29.6624	0.280289	0
597	0	0	29	0	0	0	0	0	0	0	1	0	0	0	0	0	0	0	0	0	0	1	0	1	28.5513	0.273423	0
598	0	1	42	0	0	0	0	0	0	0	0	0	0	0	0	0	0	0	0	0	0	1	0	1	35.5556	0.318404	0
599	1	0	68	0	0	0	0	0	0	0	0	0	0	0	0	0	0	0	0	0	0	1	0	1	82.4669	0.665285	1
600	0	1	33	0	0	0	0	0	0	0	0	0	0	0	0	0	0	0	0	0	0	1	0	1	25.5556	0.255442	0
601	1	0	36	0	0	1	0	0	0	0	0	0	1	0	1	0	0	0	0	0	0	0	0	1	46.9113	0.398771	1
602	0	1	51	1	1	0	1	0	0	0	0	0	0	0	0	0	0	0	0	0	0	0	0	1	45.5555	0.388781	1
603	0	1	37	0	0	1	0	0	0	0	0	0	0	0	0	0	0	0	0	0	0	0	0	1	30	0.282396	0
604	0	1	38	0	0	0	0	0	0	0	0	0	0	0	0	0	0	0	0	0	0	0	0	1	31.1111	0.289398	0
605	1	1	22	1	0	0	1	0	0	0	0	0	1	0	1	0	0	0	0	0	0	0	0	1	23.9156	0.245933	0
606	0	1	59	0	0	0	0	0	0	0	0	0	0	0	1	0	0	0	0	0	0	0	0	1	54.4444	0.455603	1
607	0	1	36	0	0	0	0	0	0	0	0	0	0	0	0	0	0	1	0	0	0	0	0	1	28.8889	0.275498	0
608	0	1	31	0	1	0	0	0	0	0	0	0	0	0	0	0	0	0	0	0	0	0	0	1	23.3333	0.242615	0
609	1	0	48	0	0	0	0	0	0	0	0	0	0	0	0	0	0	0	0	0	0	0	0	1	60.2447	0.500246	1
610	1	0	35	0	0	1	0	0	0	0	0	0	0	0	0	0	0	0	0	0	0	0	0	1	45.8002	0.390577	1
611	1	0	72	0	0	0	0	0	0	0	0	0	0	0	0	0	0	0	0	0	0	1	0	1	86.9113	0.695112	1
612	0	1	21	0	0	0	0	0	0	0	1	0	0	0	0	0	0	0	0	0	0	1	0	1	12.2222	0.185221	0
613	0	1	65	0	0	1	0	0	0	0	0	0	0	0	0	0	0	0	0	0	0	0	0	1	61.1111	0.506932	1
614	1	0	49	0	0	0	0	0	0	0	0	0	1	0	0	0	0	0	0	0	0	1	0	1	61.3558	0.50882	1
615	0	0	31	0	0	0	0	0	0	0	0	0	1	0	0	0	0	0	0	0	0	0	0	1	30.7735	0.28726	0
616	0	1	25	0	1	0	0	0	0	0	0	0	0	1	0	0	0	0	0	0	0	0	0	1	26.1602	0.259007	0
617	0	1	49	1	0	0	0	0	0	0	0	0	0	0	0	0	0	0	0	0	0	0	0	1	43.3333	0.37261	0
618	1	1	21	0	0	0	0	0	0	0	0	0	0	0	0	0	0	0	0	0	0	1	0	1	22.8045	0.239628	0
619	0	1	53	0	0	0	0	0	0	0	0	0	0	0	0	0	0	0	0	0	0	1	0	1	47.7778	0.4052	1
620	0	1	31	0	0	0	1	0	0	0	0	0	0	0	0	0	0	0	0	0	0	1	1	1	23.3333	0.242615	0
621	0	1	46	0	0	0	1	0	0	0	0	0	1	0	0	0	0	0	0	0	0	0	0	1	40	0.348889	0
622	0	1	53	1	1	0	0	0	0	0	0	0	0	0	0	0	0	0	0	0	0	1	0	1	47.7778	0.4052	1
623	0	1	40	0	0	0	0	0	0	0	0	0	0	1	0	0	0	0	0	0	0	1	0	1	42.8269	0.368963	0
624	0	1	38	0	0	0	0	0	0	0	0	0	0	0	0	0	0	0	0	0	0	0	0	1	31.1111	0.289398	0
625	0	1	26	1	1	0	1	0	0	0	0	0	0	0	0	0	0	0	0	0	0	1	0	1	17.7778	0.212507	0
626	0	0	32	0	0	0	0	0	0	0	0	0	0	0	0	0	0	0	0	0	0	0	0	1	31.8846	0.294333	0
627	1	0	66	0	0	0	0	0	0	0	0	0	0	1	0	0	0	0	0	0	0	1	0	1	89.7382	0.713284	1
628	1	1	68	0	0	0	0	0	0	0	1	0	0	1	0	1	0	0	0	0	0	1	1	1	84.5202	0.679249	1
629	1	0	73	0	1	0	0	0	0	0	0	1	0	0	0	0	0	0	0	0	0	0	0	1	102.145	0.784886	1
630	0	1	24	0	0	0	0	0	0	0	0	0	0	0	0	0	0	0	0	0	0	0	0	1	15.5556	0.201254	0
631	0	1	26	1	1	0	1	0	0	0	0	0	0	0	0	0	0	0	0	0	0	0	0	1	17.7778	0.212507	0
632	1	1	76	0	0	1	0	0	0	0	1	0	0	0	0	0	0	0	0	0	0	1	1	1	83.9156	0.675169	1
633	1	1	65	0	0	1	0	0	0	0	0	0	0	0	0	0	0	0	0	0	0	1	0	1	71.6934	0.58768	1
634	0	1	24	0	0	0	0	0	0	0	0	0	0	1	0	0	0	0	0	0	0	0	0	1	25.0491	0.25248	0
635	0	1	34	0	0	0	0	0	0	0	0	0	0	0	0	0	0	0	0	0	0	0	0	1	26.6667	0.262019	0
636	1	0	21	1	0	1	0	0	0	0	0	0	0	0	0	0	0	0	0	0	0	0	0	1	30.2447	0.283929	0
637	0	1	19	0	0	0	0	0	0	0	0	0	0	0	0	0	0	0	0	0	0	0	0	1	10	0.175091	0
638	0	1	36	0	0	1	0	0	0	0	0	0	0	0	1	0	0	0	0	0	0	0	0	1	28.8889	0.275498	0
639	0	1	59	0	0	0	0	0	0	0	0	0	0	0	0	0	0	0	0	0	0	0	0	1	54.4444	0.455603	1
640	0	1	24	0	0	0	0	0	0	0	0	0	0	0	0	0	0	0	0	0	0	0	0	1	15.5556	0.201254	0
641	0	1	31	0	0	0	0	0	0	0	0	0	0	1	0	0	0	0	0	0	0	1	0	1	32.8269	0.30041	0
642	1	0	54	0	0	0	0	0	0	0	0	0	0	1	0	0	0	0	0	0	0	1	0	1	76.4049	0.622416	1
643	0	1	49	0	0	0	0	0	0	0	0	0	1	0	0	0	0	0	0	0	0	0	0	1	43.3333	0.37261	0
644	1	0	89	0	0	0	0	0	0	0	0	0	0	1	0	0	0	0	0	0	0	1	0	1	115.294	0.845566	1
645	0	1	31	0	0	0	0	0	0	0	1	0	0	0	0	0	0	0	0	0	0	0	0	1	23.3333	0.242615	0
646	0	1	40	1	1	0	1	0	0	0	0	0	0	0	0	0	0	0	0	0	0	0	0	1	33.3333	0.303706	0
647	0	1	27	1	1	0	1	0	0	0	0	0	0	0	0	0	0	0	0	0	0	0	0	1	18.8889	0.218303	0
648	0	0	52	0	0	0	0	0	0	0	0	0	0	0	0	0	0	0	0	0	1	1	0	1	54.1069	0.45302	1
649	0	1	36	0	0	0	0	0	0	0	0	0	0	0	0	0	0	0	0	0	0	1	0	1	28.8889	0.275498	0
650	0	1	20	1	1	0	1	0	1	0	0	0	0	0	0	0	0	0	0	0	0	0	0	1	11.1111	0.1801	0
651	0	1	49	0	0	0	0	0	0	0	0	0	0	0	0	0	0	0	0	0	0	0	0	1	43.3333	0.37261	0
652	1	0	60	1	0	1	0	0	0	0	0	0	0	0	0	0	0	0	0	0	0	1	0	1	73.578	0.601701	1
653	0	1	20	1	0	0	0	0	0	0	0	0	0	1	0	0	0	0	0	0	0	0	0	1	20.6046	0.227475	0
654	0	1	39	0	0	0	0	0	0	0	0	0	0	0	0	0	0	0	0	0	0	0	0	1	32.2222	0.296502	0
655	1	0	53	0	0	1	0	0	0	0	1	0	0	0	0	0	0	0	0	0	0	1	0	1	65.8002	0.543012	1
656	1	0	66	0	0	1	0	0	0	0	0	0	0	0	0	0	0	0	0	0	0	1	0	1	80.2447	0.649842	1
657	1	1	60	1	1	0	1	0	0	1	0	0	0	0	1	0	0	0	0	0	0	1	1	1	128.777	0.892491	1
658	0	1	22	0	0	0	0	0	0	0	0	0	0	1	0	0	0	0	0	0	0	1	0	1	22.8269	0.239754	0
659	1	1	66	0	0	0	0	0	0	0	0	0	0	0	0	0	0	0	0	0	0	1	0	1	72.8045	0.595965	1
660	0	1	24	0	0	0	0	0	0	0	0	0	1	0	0	0	0	0	0	0	0	1	0	1	15.5556	0.201254	0
661	0	1	34	0	0	0	0	0	0	0	0	0	0	0	0	0	0	0	0	0	0	0	0	1	26.6667	0.262019	0
662	0	1	36	0	0	0	0	0	0	0	0	0	0	0	0	0	0	0	0	0	0	1	1	1	28.8889	0.275498	0
663	1	0	29	0	0	1	0	0	0	0	0	0	0	1	0	0	0	0	0	0	0	0	0	1	48.6271	0.411534	1
664	0	1	31	0	0	0	0	0	0	0	0	0	0	0	0	0	0	0	0	0	0	0	0	1	23.3333	0.242615	0
665	0	1	22	1	0	0	0	0	0	0	0	0	1	0	0	0	0	0	0	0	0	0	0	1	13.3333	0.190453	0
666	1	0	74	0	0	1	0	0	0	0	0	0	0	0	0	1	0	0	0	0	0	1	0	1	89.1336	0.709452	1
667	0	1	19	0	0	0	0	0	0	0	1	0	0	0	0	0	0	0	0	0	0	0	0	1	10	0.175091	0
668	0	1	30	0	0	0	0	0	0	0	0	0	0	0	0	0	0	0	0	0	0	0	0	1	22.2222	0.236369	0
669	1	0	36	0	0	0	0	0	0	0	0	0	0	0	0	0	0	0	0	0	0	1	0	1	46.9113	0.398771	1
670	1	1	52	0	0	0	0	0	0	0	0	0	0	1	0	0	0	0	0	0	0	1	0	1	66.7425	0.550219	1
671	0	1	28	0	0	0	0	0	0	0	1	0	0	0	0	0	0	0	0	0	0	0	0	1	20	0.224212	0
672	0	0	39	0	0	0	0	0	0	0	0	0	0	0	0	0	0	0	0	0	0	0	0	1	39.6624	0.346525	0
673	1	0	68	0	0	0	0	0	0	0	0	0	0	0	0	0	0	1	0	0	0	1	0	1	82.4669	0.665285	1
674	1	0	34	0	0	0	0	0	0	0	0	0	0	0	0	0	0	0	0	0	0	1	0	1	44.6891	0.382445	0
675	1	0	51	0	0	0	0	0	0	0	0	0	0	0	0	0	0	0	0	0	0	0	0	1	63.578	0.525946	1
676	1	1	82	0	0	0	0	0	0	0	1	0	0	0	0	0	0	0	0	0	0	1	0	1	90.5823	0.718583	1
677	0	1	30	0	0	0	0	0	0	0	0	0	0	0	0	0	0	0	0	0	0	1	0	1	22.2222	0.236369	0
678	0	1	28	0	0	0	0	0	0	0	0	0	0	0	0	0	0	0	0	0	0	0	0	1	20	0.224212	0
679	1	0	57	0	0	0	0	0	0	0	0	0	0	1	0	0	0	0	0	0	0	0	0	1	79.7382	0.646276	1
680	0	1	53	0	0	0	0	0	0	0	0	0	0	0	1	0	0	0	0	0	0	0	0	1	47.7778	0.4052	1
681	1	1	79	0	0	0	0	0	0	0	0	0	0	1	0	0	0	0	0	0	1	0	0	1	96.7425	0.755395	1
682	1	0	63	0	0	1	0	0	0	0	0	0	0	0	0	0	0	0	0	0	0	1	0	1	76.9113	0.626083	1
683	0	1	23	1	1	0	1	0	0	0	0	0	0	0	0	0	0	0	0	0	0	0	0	1	14.4444	0.195797	0
684	0	1	33	0	0	0	0	0	1	0	0	0	0	0	0	0	0	0	0	0	0	1	0	1	25.5556	0.255442	0
685	0	1	25	0	0	0	0	0	0	0	0	0	0	0	0	0	0	0	0	0	0	1	0	1	16.6667	0.206824	0
686	1	0	68	0	0	0	0	0	0	0	0	0	0	0	0	0	0	0	0	0	0	0	0	1	82.4669	0.665285	1
687	1	0	68	0	0	0	0	0	0	0	0	0	0	0	0	0	0	0	0	0	0	1	0	1	82.4669	0.665285	1
688	1	1	74	0	0	0	0	0	0	1	0	0	0	0	0	0	0	0	0	0	0	0	0	1	144.333	0.930643	1
689	1	0	56	0	0	1	0	0	0	0	0	0	0	0	0	0	0	0	0	0	0	0	0	1	69.1336	0.56841	1
690	1	0	36	0	0	0	0	0	0	0	0	0	0	1	0	0	0	0	0	0	0	0	0	1	56.4049	0.470648	1
691	1	1	68	0	0	0	0	0	0	0	0	0	1	0	0	0	0	0	0	0	0	1	0	1	75.0267	0.612367	1
692	0	1	39	1	0	0	0	0	0	0	0	0	0	0	0	0	0	0	0	0	0	1	0	1	32.2222	0.296502	0
693	0	1	21	0	0	1	0	0	0	0	0	0	1	0	0	0	0	0	0	0	0	0	0	1	12.2222	0.185221	0
694	0	1	45	0	0	0	0	0	0	0	0	0	0	0	0	0	0	0	0	0	0	0	0	1	38.8889	0.341138	0
695	0	0	35	1	1	0	0	0	0	0	0	0	0	0	0	0	0	0	0	0	0	1	0	1	35.218	0.316146	0
696	0	1	41	0	0	0	0	0	0	0	0	0	0	0	0	0	0	0	0	0	0	0	0	1	34.4444	0.311007	0
697	0	1	29	0	0	0	0	0	0	0	0	0	0	0	0	0	0	0	0	0	0	0	0	1	21.1111	0.230234	0
698	1	1	61	0	0	1	0	0	0	0	0	0	1	0	0	0	0	0	0	0	0	1	0	1	67.2489	0.554085	1
699	0	1	29	1	1	0	0	0	0	0	0	0	0	0	0	0	0	0	0	0	0	1	0	1	21.1111	0.230234	0
700	1	1	28	0	0	0	0	0	0	0	0	0	0	1	0	0	0	0	0	0	0	1	0	1	40.0758	0.34942	0
701	1	1	44	0	0	0	0	0	0	0	0	0	0	0	0	0	0	0	0	0	0	0	0	1	48.36	0.409539	1
702	0	1	25	1	1	0	1	0	0	0	0	0	0	0	0	0	0	0	0	0	0	0	0	1	16.6667	0.206824	0
703	1	0	65	0	0	1	0	0	0	0	0	0	0	0	0	0	0	0	0	0	0	0	0	1	79.1336	0.641998	1
704	0	1	40	0	0	0	0	0	0	0	0	0	0	0	0	0	0	0	0	0	0	1	0	1	33.3333	0.303706	0
705	0	1	30	1	1	0	1	0	0	0	0	0	0	0	0	0	0	0	0	0	0	0	0	1	22.2222	0.236369	0
706	1	1	43	0	0	0	0	0	0	0	0	0	0	0	0	0	0	0	0	0	0	1	0	1	47.2489	0.401272	1
707	0	1	19	0	0	1	0	0	0	0	1	0	0	0	0	0	0	0	0	0	0	0	0	1	10	0.175091	0
708	1	1	34	0	0	0	0	0	0	0	0	1	0	0	0	0	0	0	0	0	0	1	0	1	51.3718	0.432194	1
709	0	1	39	0	1	0	0	0	0	0	0	0	0	0	0	0	0	0	0	0	0	0	0	1	32.2222	0.296502	0
710	1	0	43	0	0	0	0	0	0	0	0	0	1	0	0	0	0	0	0	0	0	0	0	1	54.6891	0.457477	1
711	1	0	74	0	0	0	0	0	0	0	0	0	0	0	0	0	0	0	0	0	0	1	0	1	89.1336	0.709452	1
712	1	0	66	0	0	0	0	0	0	0	0	0	0	0	0	0	0	0	1	0	0	0	0	1	80.2447	0.649842	1
713	0	1	25	0	0	0	0	0	0	0	0	0	0	0	0	0	0	0	0	0	0	0	0	1	16.6667	0.206824	0
714	0	1	34	0	0	0	0	0	0	0	0	1	0	1	0	0	0	0	0	0	0	0	0	1	50.2831	0.423967	1
715	0	1	30	0	0	0	0	0	0	0	0	0	0	0	0	0	0	0	0	0	0	1	0	1	22.2222	0.236369	0
716	0	1	41	0	0	0	0	0	0	0	0	0	0	0	0	0	0	0	0	0	0	0	0	1	34.4444	0.311007	0
717	0	1	21	0	0	0	0	0	0	0	0	0	1	0	0	0	0	0	0	0	0	0	0	1	12.2222	0.185221	0
718	0	1	36	1	1	0	0	0	0	0	0	0	0	0	0	0	0	0	0	0	0	0	0	1	28.8889	0.275498	0
719	1	0	43	0	0	0	0	0	0	0	0	0	0	0	0	0	0	0	0	0	0	0	0	1	54.6891	0.457477	1
720	0	1	21	0	0	0	0	0	0	0	0	0	0	0	0	0	0	0	0	0	0	0	0	1	12.2222	0.185221	0
721	0	1	29	0	0	0	0	0	0	0	0	0	0	0	0	0	0	0	0	0	0	1	0	1	21.1111	0.230234	0
722	1	0	54	0	0	1	0	0	0	0	0	0	0	0	0	0	0	0	0	0	0	1	0	1	66.9113	0.551509	1
723	0	1	44	0	0	0	0	0	0	0	0	1	0	0	0	0	0	0	0	0	0	0	0	1	51.9006	0.436205	1
724	1	0	77	0	0	1	0	0	0	0	0	0	1	0	0	0	0	0	0	0	0	1	0	1	92.4669	0.730196	1
725	0	1	22	0	0	0	0	0	0	0	0	0	0	0	0	0	0	0	0	0	0	0	0	1	13.3333	0.190453	0
726	0	1	31	0	0	0	0	0	0	0	0	0	0	0	0	0	0	0	0	0	0	0	0	1	23.3333	0.242615	0
727	0	0	48	0	0	0	0	0	0	0	0	0	0	0	0	0	0	0	0	0	0	1	0	1	49.6624	0.419295	1
728	1	1	65	1	0	0	0	0	0	0	0	0	1	0	0	0	0	0	0	0	0	0	0	1	71.6934	0.58768	1
729	1	0	26	0	0	0	0	0	0	0	0	0	0	0	0	0	0	0	0	0	0	0	0	1	35.8002	0.320045	0
730	1	0	49	0	0	0	0	0	0	0	0	0	0	0	0	0	0	0	0	0	0	0	0	1	61.3558	0.50882	1
731	1	1	62	0	0	0	0	0	0	0	0	0	0	1	0	0	0	0	0	0	0	1	1	1	77.8536	0.632867	1
732	0	1	45	0	0	1	0	0	0	0	0	0	0	0	0	0	0	0	0	0	0	0	0	1	38.8889	0.341138	0
733	1	1	28	0	0	0	0	0	0	0	0	0	0	1	0	0	0	0	0	0	0	0	0	1	40.0758	0.34942	0
734	1	1	68	0	0	0	0	0	0	0	0	0	0	0	0	0	0	0	0	0	0	1	1	1	75.0267	0.612367	1
735	0	0	41	0	0	0	0	0	0	0	0	0	0	0	0	0	0	0	0	0	0	1	0	1	41.8846	0.362217	0
736	0	1	36	0	0	0	0	0	0	0	0	0	0	0	0	0	0	0	0	0	0	1	0	1	28.8889	0.275498	0
737	0	1	44	0	1	0	0	0	0	0	0	0	0	0	0	0	0	0	0	0	0	0	0	1	37.7778	0.333472	0
738	1	1	48	0	0	0	0	0	0	0	0	0	0	0	0	0	0	0	0	0	0	0	0	1	52.8045	0.443078	1
739	0	1	36	0	0	0	0	0	0	0	1	0	0	0	0	0	0	0	0	0	0	0	0	1	28.8889	0.275498	0
740	0	1	31	1	1	0	0	0	0	0	0	0	0	0	0	0	0	0	0	0	0	0	0	1	23.3333	0.242615	0
741	0	0	43	0	0	0	0	0	0	0	0	0	0	0	0	0	0	0	0	0	0	1	0	1	44.1069	0.378209	0
742	1	0	44	0	0	1	0	0	0	0	0	0	0	0	0	0	0	0	0	0	0	1	0	1	55.8002	0.466001	1
743	1	0	54	0	0	0	0	0	0	0	0	0	0	1	0	0	0	0	0	0	0	0	0	1	76.4049	0.622416	1
744	0	1	37	0	0	0	0	0	0	0	0	0	0	0	0	0	0	0	0	0	0	0	0	1	30	0.282396	0
745	1	1	40	0	0	1	0	0	0	0	0	0	0	0	0	0	0	0	0	0	0	1	0	1	43.9156	0.376822	0
746	0	1	23	0	0	0	0	0	0	0	0	0	0	0	1	0	0	0	0	0	0	0	0	1	14.4444	0.195797	0
747	1	0	59	0	0	1	0	0	0	0	0	0	1	0	0	0	0	0	0	0	0	0	0	1	72.4669	0.593453	1
748	0	1	26	0	0	0	0	0	1	0	0	0	0	0	0	0	0	0	0	0	0	0	0	1	17.7778	0.212507	0
749	0	1	33	1	0	0	0	0	0	0	0	0	0	0	0	0	0	0	0	0	0	0	0	1	25.5556	0.255442	0
750	1	1	72	0	0	0	0	0	0	1	0	0	0	1	0	0	0	1	0	0	0	1	1	1	151.604	0.943803	1
751	0	0	31	1	0	0	0	0	0	0	0	0	0	1	0	0	0	0	0	0	0	0	0	1	40.2671	0.350764	0
752	1	1	38	0	0	0	0	0	0	0	0	1	0	0	0	0	0	0	0	0	0	0	0	1	55.8162	0.466124	1
753	1	0	68	1	1	0	1	0	0	1	0	0	0	1	0	0	0	1	0	0	0	1	1	1	154.6	0.948511	1
754	0	0	25	0	0	0	0	0	0	0	0	0	0	0	0	0	0	0	0	0	0	0	0	1	24.1069	0.24703	0
755	0	1	21	0	0	0	0	0	0	0	1	0	0	0	0	0	0	0	0	0	0	0	0	1	12.2222	0.185221	0
756	1	1	40	0	0	0	0	0	0	0	0	0	0	0	0	0	0	0	0	0	0	0	0	1	43.9156	0.376822	0
757	0	0	50	0	0	0	0	0	0	0	0	0	0	0	0	0	0	0	0	0	0	1	0	1	51.8846	0.436083	1
758	0	1	41	0	0	1	0	0	0	0	0	0	1	0	0	0	0	0	0	0	0	0	0	1	34.4444	0.311007	0
759	0	1	48	0	0	1	0	0	0	0	0	0	0	0	0	0	0	0	0	0	0	0	0	1	42.2222	0.364628	0
760	1	0	34	0	0	0	0	0	0	0	0	0	0	0	0	0	0	0	0	0	0	0	0	1	44.6891	0.382445	0
761	1	0	38	0	0	0	0	0	0	0	0	0	0	1	0	0	0	0	0	0	0	0	0	1	58.6271	0.487766	1
762	0	1	23	0	0	0	0	0	0	0	0	0	0	0	0	0	0	0	0	0	0	0	0	1	14.4444	0.195797	0
763	0	1	45	0	0	0	0	0	0	0	0	0	0	0	0	0	0	0	0	0	0	1	0	1	38.8889	0.341138	0
764	0	1	31	0	0	0	0	0	0	0	0	0	1	0	0	0	0	0	0	0	0	0	0	1	23.3333	0.242615	0
765	0	1	52	0	0	1	0	0	0	0	0	0	0	0	0	0	0	0	0	0	0	0	0	1	46.6667	0.396962	1
766	0	1	48	1	0	1	0	0	0	0	0	0	0	0	0	0	0	0	0	0	0	0	0	1	42.2222	0.364628	0
767	0	1	22	0	0	0	0	0	0	0	0	0	0	0	0	0	0	0	1	0	0	0	0	1	13.3333	0.190453	0
768	1	0	73	0	0	0	0	0	1	0	0	0	0	0	0	0	1	0	0	0	0	1	0	1	88.0225	0.702332	1
769	0	1	30	0	0	1	0	0	0	0	0	0	0	0	0	0	0	0	0	0	0	0	0	1	22.2222	0.236369	0
770	1	0	65	0	0	1	0	0	0	0	0	0	0	0	0	0	0	0	0	0	0	0	0	1	79.1336	0.641998	1
771	1	1	16	0	0	0	0	0	0	0	0	0	1	0	0	0	0	0	0	0	0	1	0	1	17.2489	0.209788	0
772	0	1	23	1	1	0	1	0	0	0	0	0	0	0	0	0	0	0	0	0	0	0	0	1	14.4444	0.195797	0
773	1	1	37	0	0	0	0	0	0	0	0	0	0	0	0	0	0	0	1	0	0	0	0	1	40.5823	0.352983	0
774	0	1	20	0	0	0	0	0	0	0	0	0	0	0	0	0	0	0	0	0	0	0	0	1	11.1111	0.1801	0
775	1	0	60	0	0	0	0	0	0	0	0	0	0	1	0	0	0	0	0	0	0	1	0	1	83.0715	0.669429	1
776	1	0	70	1	0	0	0	0	0	0	0	0	1	1	0	0	0	0	0	0	0	1	1	1	94.1827	0.740502	1
777	0	1	32	0	0	0	0	0	0	0	0	0	0	0	0	0	0	0	0	0	0	0	0	1	24.4444	0.248973	0
778	0	1	23	0	0	0	0	0	0	0	0	0	0	1	0	0	0	0	0	0	0	0	0	1	23.938	0.246062	0
779	0	1	34	0	0	0	0	0	0	0	0	0	0	0	0	0	0	0	0	0	0	0	0	1	26.6667	0.262019	0
780	0	1	35	0	0	0	0	0	0	0	0	0	0	0	0	0	0	0	0	0	0	0	0	1	27.7778	0.268705	0
781	0	1	71	0	0	0	0	0	0	0	0	0	0	0	0	0	0	0	1	0	0	1	0	1	67.7778	0.558115	1
782	1	1	24	0	0	0	0	0	0	0	0	0	1	0	0	0	0	0	0	0	0	1	0	1	26.1378	0.258875	0
783	0	1	39	0	0	0	0	0	0	0	0	0	0	0	0	0	0	0	0	0	0	0	0	1	32.2222	0.296502	0
784	0	0	25	0	0	0	0	0	0	0	0	0	0	0	0	0	0	0	0	0	0	1	0	1	24.1069	0.24703	0
785	0	1	21	0	0	0	0	0	0	0	1	0	0	0	0	0	0	0	0	0	0	0	0	1	12.2222	0.185221	0
786	0	1	31	0	0	0	0	0	0	0	1	0	0	0	0	0	0	0	0	0	0	0	0	1	23.3333	0.242615	0
787	1	1	78	1	1	0	0	1	1	1	0	0	0	0	0	0	0	0	0	0	0	1	0	1	187.167	0.980523	1
788	0	1	22	0	0	0	0	0	0	0	0	0	0	0	0	0	0	0	0	0	0	0	0	1	13.3333	0.190453	0
789	1	1	57	0	0	0	0	0	0	0	0	1	0	0	0	0	0	0	0	0	0	1	1	1	76.9273	0.626199	1
790	0	1	29	1	0	0	0	0	0	0	1	0	0	1	0	0	0	0	0	0	0	1	0	1	30.6046	0.286194	0
791	0	1	33	0	0	0	0	0	0	0	1	0	0	0	0	0	0	0	0	0	0	1	0	1	25.5556	0.255442	0
792	0	1	29	0	0	0	0	0	0	0	0	0	0	0	0	0	0	0	0	0	0	0	0	1	21.1111	0.230234	0
793	0	1	38	0	0	0	0	0	0	0	0	0	0	0	0	1	0	0	0	0	0	0	0	1	31.1111	0.289398	0
794	1	0	15	0	0	0	0	0	0	0	0	0	1	0	0	0	0	0	0	0	0	0	0	1	23.578	0.244006	0
795	0	1	42	0	0	0	1	0	0	0	0	0	0	0	0	0	0	0	0	0	0	1	0	1	35.5556	0.318404	0
796	0	1	24	1	1	0	1	0	0	0	0	0	0	0	0	0	0	0	0	0	0	0	0	1	15.5556	0.201254	0
797	0	0	24	0	0	0	0	0	0	0	0	1	0	1	0	0	0	0	0	0	0	0	0	1	46.6121	0.396559	1
798	0	1	39	0	1	0	0	0	0	0	0	0	0	0	0	0	0	0	0	0	0	0	0	1	32.2222	0.296502	0
799	0	1	36	0	0	0	0	0	0	0	0	0	0	0	0	0	0	0	1	0	0	1	1	1	28.8889	0.275498	0
800	1	1	51	1	1	0	1	0	0	0	0	0	0	0	1	0	0	0	0	0	0	0	0	1	56.1378	0.468595	1
801	0	0	53	0	0	1	0	0	0	0	0	0	0	0	0	0	0	0	0	0	0	1	0	1	55.218	0.461531	1
802	1	1	70	0	0	0	0	0	0	0	0	0	0	0	0	0	0	0	0	0	0	1	1	1	77.2489	0.628519	1
803	0	1	27	0	0	0	0	0	0	0	0	0	0	0	0	0	0	0	0	0	0	0	0	1	18.8889	0.218303	0
804	1	0	84	0	0	0	0	0	0	0	0	0	0	0	0	0	0	0	0	0	0	0	0	1	100.245	0.774815	1
805	1	0	62	0	0	1	0	0	0	0	0	0	0	0	0	0	0	0	0	0	0	1	0	1	75.8002	0.61802	1
806	1	1	62	0	0	0	0	0	0	0	0	0	0	0	0	0	0	0	0	0	0	1	0	1	68.36	0.562543	1
807	1	1	51	0	0	0	0	0	0	0	0	0	0	0	0	0	0	0	0	0	0	0	0	1	56.1378	0.468595	1
808	1	1	74	0	0	0	0	0	0	0	0	0	0	0	0	0	0	0	0	0	0	1	0	1	81.6934	0.659948	1
809	1	0	68	0	0	0	0	0	0	0	0	0	0	0	0	0	0	0	0	0	0	1	0	1	82.4669	0.665285	1
810	0	1	44	0	0	0	0	0	0	0	0	0	0	0	0	0	0	0	1	0	0	0	0	1	37.7778	0.333472	0
811	1	0	89	0	0	0	0	0	0	0	0	0	0	0	0	0	0	0	0	0	0	0	0	1	105.8	0.803322	1
812	0	1	32	0	0	0	0	0	0	0	0	0	0	0	0	0	0	0	0	0	0	0	0	1	24.4444	0.248973	0
813	1	1	32	1	0	0	0	0	0	0	0	0	1	0	0	0	0	0	0	0	0	0	0	1	35.0267	0.314871	0
814	1	1	79	1	0	0	1	0	0	0	0	0	0	0	0	0	0	0	0	0	0	1	0	1	87.2489	0.697316	1
815	0	1	32	0	0	0	0	0	0	0	1	0	0	0	0	0	0	0	0	0	0	1	0	1	24.4444	0.248973	0
816	1	0	55	0	0	0	0	0	0	0	0	0	0	0	0	0	0	0	0	0	0	0	0	1	68.0225	0.559977	1
817	0	1	20	0	1	0	0	0	0	0	1	0	0	0	0	0	0	0	0	0	0	0	0	1	11.1111	0.1801	0
818	1	1	19	1	0	0	0	0	0	0	0	0	0	0	0	0	0	0	1	0	0	0	0	1	20.5823	0.227354	0
819	0	1	31	0	0	0	0	0	0	0	0	0	0	0	0	0	0	0	0	0	0	0	0	1	23.3333	0.242615	0
820	0	1	21	0	0	0	0	0	0	0	1	0	0	0	0	0	0	0	0	0	0	1	0	1	12.2222	0.185221	0
821	1	1	68	0	0	0	0	0	0	0	0	0	0	0	0	0	1	0	0	0	0	1	0	1	75.0267	0.612367	1
822	0	1	23	0	0	0	0	0	0	0	1	0	0	0	0	0	0	0	0	0	0	0	0	1	14.4444	0.195797	0
823	0	1	26	1	1	0	1	0	0	0	0	0	0	0	0	0	0	0	0	0	0	0	0	1	17.7778	0.212507	0
824	1	0	39	0	0	0	0	0	0	0	0	0	0	0	0	0	0	0	0	0	0	1	0	1	50.2447	0.423677	1
825	0	1	41	0	0	1	0	0	0	0	0	0	0	0	0	0	0	0	0	0	0	0	0	1	34.4444	0.311007	0
826	0	1	22	1	1	0	1	0	0	0	1	0	0	0	0	0	0	0	0	0	0	0	0	1	13.3333	0.190453	0
827	0	1	47	0	0	0	0	0	0	0	0	0	0	0	0	0	0	0	0	0	0	1	0	1	41.1111	0.35672	0
828	0	0	49	0	0	0	0	0	0	0	0	1	0	0	0	0	0	0	0	0	0	0	0	1	64.8964	0.53608	1
829	0	1	27	0	0	0	0	0	0	0	0	0	0	1	0	0	0	0	0	0	0	0	0	1	28.3824	0.272388	0
830	1	1	67	0	0	0	0	0	0	0	0	0	0	0	1	0	0	0	0	0	0	1	0	1	73.9156	0.604195	1
831	0	1	27	0	0	0	0	0	0	0	1	0	0	1	0	0	0	0	0	0	0	0	0	1	28.3824	0.272388	0
832	0	0	25	0	0	1	0	0	0	0	0	0	0	0	0	0	0	0	0	0	0	1	0	1	24.1069	0.24703	0
833	0	1	56	0	0	0	0	0	0	0	0	0	0	0	0	0	0	0	0	0	0	0	0	1	51.1111	0.430221	1
834	1	1	51	0	0	1	0	0	0	0	0	0	0	0	0	0	0	0	0	0	0	1	0	1	56.1378	0.468595	1
835	0	1	23	0	1	0	0	0	0	0	0	0	0	0	0	0	1	0	0	0	0	0	0	1	14.4444	0.195797	0
836	0	1	20	1	1	0	1	0	0	0	1	0	0	0	0	0	0	0	0	0	0	0	0	1	11.1111	0.1801	0
837	1	0	51	0	0	1	0	0	0	0	0	0	1	1	0	0	0	0	0	0	0	1	0	1	73.0715	0.597948	1
838	1	0	69	0	0	0	0	0	0	0	0	1	0	0	0	0	0	0	0	0	0	1	0	1	97.7009	0.76082	1
839	1	1	67	0	0	0	0	0	0	0	0	0	0	0	0	0	0	0	0	0	0	0	0	1	73.9156	0.604195	1
840	1	1	61	1	1	0	1	0	0	1	0	0	0	0	0	0	0	0	0	0	0	1	1	1	129.888	0.895738	1
841	1	1	25	1	0	0	0	0	0	0	0	0	0	0	0	0	0	0	0	0	0	0	0	1	27.2489	0.265509	0
842	0	1	22	1	1	0	1	0	0	0	0	0	0	0	0	0	0	0	0	0	0	0	0	1	13.3333	0.190453	0
843	1	0	51	0	0	0	0	0	0	0	0	0	0	0	0	1	0	0	0	0	0	0	0	1	63.578	0.525946	1
844	0	1	53	0	0	1	0	0	0	0	0	0	0	0	0	0	0	0	0	0	0	0	0	1	47.7778	0.4052	1
845	1	0	36	0	0	0	0	0	0	0	0	0	1	0	0	0	0	0	0	0	0	0	0	1	46.9113	0.398771	1
846	1	1	67	0	0	0	0	0	0	0	0	0	0	0	0	0	0	1	0	0	0	1	0	1	73.9156	0.604195	1
847	0	1	25	0	0	0	0	0	0	0	1	0	0	0	0	0	0	0	0	0	0	1	0	1	16.6667	0.206824	0
848	0	0	34	0	0	0	0	0	0	0	0	0	0	0	0	0	0	0	0	0	0	0	0	1	34.1069	0.308778	0
849	0	1	25	0	0	0	0	0	0	0	0	0	0	0	0	0	0	0	0	0	0	0	0	1	16.6667	0.206824	0
850	1	0	67	0	0	0	0	0	0	0	0	0	0	0	0	0	0	0	0	0	0	1	0	1	81.3558	0.657605	1
851	0	1	29	0	0	0	0	0	0	0	0	0	0	0	0	0	0	0	0	0	0	1	0	1	21.1111	0.230234	0
852	0	1	35	0	0	0	0	0	0	0	0	0	0	1	0	0	0	0	0	0	0	0	0	1	37.2713	0.330006	0
853	1	0	59	0	0	0	0	0	0	0	0	0	0	0	0	0	0	0	0	0	0	1	0	1	72.4669	0.593453	1
854	1	1	61	0	0	0	0	0	0	0	0	0	0	0	0	0	0	0	0	0	0	0	0	1	67.2489	0.554085	1
855	1	1	64	0	0	0	0	0	0	0	0	0	0	0	0	0	0	0	0	0	1	1	1	1	70.5823	0.579345	1
856	1	0	59	0	0	1	0	0	0	0	0	0	0	1	0	0	0	0	0	0	0	1	0	1	81.9604	0.661795	1
857	0	0	28	0	0	0	0	0	0	0	0	0	0	1	0	0	0	0	0	0	0	0	0	1	36.9337	0.327706	0
858	1	1	46	0	0	1	0	0	1	0	0	0	0	0	0	0	0	0	0	0	0	0	0	1	50.5823	0.426224	1
859	0	1	35	1	1	0	0	0	0	0	0	1	0	0	0	0	0	0	1	0	0	0	0	1	41.9006	0.362332	0
860	0	1	36	0	0	0	0	0	0	0	0	0	0	0	0	0	0	0	0	0	0	1	1	1	28.8889	0.275498	0
861	1	0	70	1	0	0	0	0	0	0	0	0	0	0	0	0	0	0	0	0	0	1	0	1	84.6891	0.680383	1
862	0	1	39	1	1	0	1	0	0	0	0	0	0	1	0	0	0	0	0	0	0	0	0	1	41.7158	0.361014	0
863	0	1	28	0	0	0	0	0	0	0	1	0	0	0	0	0	0	0	0	0	0	0	0	1	20	0.224212	0
864	1	1	56	0	0	0	0	0	0	0	0	0	0	0	1	0	0	0	0	0	0	0	0	1	61.6934	0.511424	1
865	0	1	45	0	0	1	0	0	0	0	0	0	0	0	0	0	0	0	0	0	0	0	0	1	38.8889	0.341138	0
866	0	1	30	0	0	0	0	0	0	0	0	0	0	0	0	0	0	0	0	0	0	0	0	1	22.2222	0.236369	0
867	0	1	37	0	0	0	0	0	0	0	0	0	0	0	0	0	0	0	0	0	0	1	0	1	30	0.282396	0
868	0	1	53	0	0	0	0	0	0	0	0	0	0	0	1	0	0	0	0	0	0	1	0	1	47.7778	0.4052	1
869	1	0	62	0	0	1	0	0	0	0	0	0	0	0	0	0	0	0	0	0	0	1	0	1	75.8002	0.61802	1
870	0	1	48	0	0	0	0	0	0	0	0	0	0	0	0	0	0	0	0	0	0	0	0	1	42.2222	0.364628	0
871	1	1	54	0	1	0	0	0	0	0	0	0	0	0	0	0	0	0	0	0	0	0	0	1	59.4711	0.494277	1
872	1	1	37	0	0	0	0	0	0	0	0	0	1	0	0	0	0	0	0	0	0	0	0	1	40.5823	0.352983	0
873	0	1	47	0	0	0	0	0	0	0	0	0	0	1	0	0	0	0	0	0	0	1	0	1	50.6046	0.426393	1
874	0	1	20	1	1	0	1	0	0	0	0	0	0	0	1	0	0	0	0	0	0	1	0	1	11.1111	0.1801	0
875	0	1	32	0	0	0	0	0	0	0	0	0	0	0	0	0	0	0	0	0	0	0	0	1	24.4444	0.248973	0
876	0	1	33	0	0	0	0	0	0	0	0	0	1	0	0	0	0	0	0	0	0	0	0	1	25.5556	0.255442	0
877	1	0	69	0	0	0	0	0	0	0	0	0	0	0	0	0	0	0	0	0	0	1	0	1	83.578	0.672879	1
878	0	1	24	1	1	0	1	0	0	0	1	0	0	0	1	0	0	0	0	0	0	0	0	1	15.5556	0.201254	0
879	0	1	36	0	0	0	0	0	0	0	0	0	0	0	0	0	0	0	0	0	0	0	0	1	28.8889	0.275498	0
880	0	1	40	0	0	1	0	0	0	0	0	0	1	0	0	0	0	0	0	0	0	0	0	1	33.3333	0.303706	0
881	0	1	37	0	0	0	0	0	0	0	0	0	0	1	0	0	0	0	0	0	0	1	0	1	39.4935	0.345346	0
882	0	1	32	0	0	0	0	0	0	0	0	1	0	0	1	0	0	0	0	0	0	1	0	1	38.5673	0.338911	0
883	0	1	35	0	1	0	0	0	0	0	0	0	0	0	0	0	0	0	0	0	0	1	0	1	27.7778	0.268705	0
884	0	1	26	0	1	0	1	0	0	0	0	0	0	1	0	0	0	0	0	0	0	0	0	1	27.2713	0.265644	0
885	0	1	23	1	1	0	1	0	0	0	0	0	0	0	0	0	0	0	0	0	0	1	0	1	14.4444	0.195797	0
886	0	0	29	0	1	0	0	0	0	0	0	1	0	0	0	0	0	0	1	0	0	0	0	1	42.6742	0.367866	0
887	0	0	23	1	1	0	0	0	0	0	0	0	0	0	0	0	0	0	0	0	0	0	0	1	21.8846	0.234493	0
888	1	0	54	0	0	1	0	1	1	0	0	0	1	0	0	0	0	0	0	0	0	1	0	1	105.302	0.80088	1
889	0	0	27	0	0	0	0	0	0	0	0	0	0	0	0	0	0	0	0	0	0	0	0	1	26.3291	0.260009	0
890	1	0	50	0	0	1	0	0	0	0	0	0	0	1	0	0	0	0	0	0	0	0	0	1	71.9604	0.589676	1
891	0	1	48	0	0	0	0	0	0	0	0	0	0	0	0	0	0	0	0	0	0	0	0	1	42.2222	0.364628	0
892	0	1	55	0	0	1	0	0	0	0	0	0	0	0	0	0	0	0	0	0	0	1	0	1	50	0.421834	1
893	0	1	44	0	0	0	0	0	0	0	0	0	0	1	0	0	0	0	0	0	0	0	0	1	47.2713	0.401438	1
894	0	0	32	0	0	0	0	0	0	0	0	0	1	1	0	0	0	0	0	0	0	0	0	1	41.3782	0.358614	0
895	0	1	27	1	1	0	1	0	0	0	0	1	0	0	0	0	0	0	0	0	0	0	0	1	33.0117	0.30161	0
896	0	1	36	0	0	0	0	0	0	0	0	0	0	0	0	0	0	0	0	0	0	0	0	1	28.8889	0.275498	0
897	1	0	55	0	0	0	0	0	0	0	0	0	0	0	0	0	0	1	0	0	0	0	0	1	68.0225	0.559977	1
898	1	0	75	0	0	1	0	0	0	0	0	0	0	0	0	0	0	0	0	0	0	0	0	1	90.2447	0.716471	1
899	0	1	26	0	0	0	0	0	0	0	0	0	0	0	0	0	0	0	0	0	0	1	1	1	17.7778	0.212507	0
900	0	1	25	1	1	0	0	0	0	0	0	0	0	0	0	0	0	0	0	0	0	0	0	1	16.6667	0.206824	0
901	0	0	50	0	0	0	0	0	0	0	0	0	0	0	0	0	0	0	0	0	0	1	0	1	51.8846	0.436083	1
902	1	0	68	0	0	0	0	0	0	0	0	0	0	0	0	0	0	0	0	0	0	0	0	1	82.4669	0.665285	1
903	0	1	40	0	0	1	0	0	0	0	0	0	0	0	0	0	0	0	0	0	0	1	0	1	33.3333	0.303706	0
904	1	0	23	0	0	0	0	0	0	0	0	0	1	0	0	0	0	0	0	0	0	1	0	1	32.4669	0.29808	0
905	0	0	30	0	0	0	0	0	0	0	0	0	0	1	0	0	0	0	0	0	0	0	0	1	39.156	0.342994	0
906	1	1	62	1	0	0	0	0	0	0	0	1	0	0	0	0	0	0	0	0	0	0	0	1	82.4829	0.665395	1
907	1	0	33	0	0	0	0	0	0	0	0	0	0	0	0	0	0	0	0	0	0	1	0	1	43.578	0.374378	0
908	0	0	22	0	0	0	0	0	0	0	1	0	0	0	0	0	0	0	0	0	0	0	0	1	20.7735	0.228393	0
909	1	1	41	0	0	0	0	0	0	0	0	1	0	0	1	0	0	0	0	0	0	0	0	1	59.1496	0.491796	1
910	0	0	40	1	0	0	0	0	0	0	1	0	0	0	0	0	0	0	0	0	0	0	0	1	40.7735	0.354332	0
911	0	1	51	0	0	0	0	0	0	0	0	0	0	0	0	0	0	0	0	0	0	1	0	1	45.5555	0.388781	1
912	1	0	36	0	0	1	0	0	0	0	0	0	0	0	0	0	0	0	0	0	0	1	0	1	46.9113	0.398771	1
913	0	1	32	0	0	1	0	0	0	0	0	0	0	0	0	0	0	0	0	0	0	1	0	1	24.4444	0.248973	0
914	0	1	33	0	0	0	0	0	0	0	0	0	0	0	0	0	0	0	0	0	0	0	0	1	25.5556	0.255442	0
915	0	1	54	0	0	0	0	0	0	0	0	1	0	0	0	0	0	0	0	0	0	1	1	1	63.0117	0.521586	1
916	0	1	35	0	0	0	0	0	0	0	0	0	0	0	0	0	0	0	0	0	0	0	0	1	27.7778	0.268705	0
917	1	0	65	0	0	0	0	0	0	0	0	0	0	1	0	0	0	0	0	0	0	1	0	1	88.6271	0.706219	1
918	0	1	28	0	0	0	0	0	0	0	0	0	0	0	0	0	0	0	0	0	0	1	0	1	20	0.224212	0
919	0	1	33	0	0	0	0	0	0	0	0	0	0	0	0	0	0	0	0	0	0	0	0	1	25.5556	0.255442	0
920	1	0	17	0	0	0	0	0	0	0	1	0	0	0	0	0	0	0	0	0	0	0	0	1	25.8002	0.256881	0
921	0	1	34	0	0	0	0	0	0	0	0	0	0	0	0	0	0	0	0	0	0	0	0	1	26.6667	0.262019	0
922	0	1	27	0	0	1	0	0	0	0	1	0	0	0	0	0	0	0	0	0	0	0	0	1	18.8889	0.218303	0
923	0	0	32	0	0	0	0	0	0	0	0	0	0	0	0	0	0	0	0	0	0	0	0	1	31.8846	0.294333	0
924	0	0	36	0	0	1	0	0	0	0	0	0	0	0	0	0	0	0	0	0	0	1	0	1	36.3291	0.323608	0
925	0	1	37	0	0	0	0	0	0	0	0	0	0	0	0	0	0	0	0	0	0	0	0	1	30	0.282396	0
926	0	1	35	0	0	0	0	0	0	0	0	0	0	0	0	0	0	0	0	0	0	0	0	1	27.7778	0.268705	0
927	0	1	27	0	0	0	0	0	0	0	0	0	0	0	0	0	0	0	0	0	0	0	0	1	18.8889	0.218303	0
928	1	1	23	0	0	0	0	0	0	0	0	0	1	0	0	0	0	0	0	0	0	1	0	1	25.0267	0.252349	0
929	0	1	22	0	0	0	0	0	0	0	1	0	0	0	0	0	0	0	0	0	0	0	0	1	13.3333	0.190453	0
930	1	0	80	0	0	0	0	0	0	0	0	0	0	0	0	0	0	0	0	0	0	1	0	1	95.8002	0.749981	1
931	0	1	51	0	0	0	0	0	0	0	0	0	0	0	0	0	0	0	0	0	0	1	0	1	45.5555	0.388781	1
932	0	1	36	0	0	0	0	0	0	0	0	0	1	0	0	0	0	0	0	0	0	0	0	1	28.8889	0.275498	0
933	0	1	30	0	0	0	0	0	0	0	0	0	0	0	0	0	0	0	0	0	0	0	0	1	22.2222	0.236369	0
934	1	1	62	0	0	0	0	0	1	0	0	0	0	0	0	0	0	0	0	0	0	1	0	1	68.36	0.562543	1
935	0	1	21	0	0	0	0	0	0	0	0	0	0	0	0	0	0	0	0	0	0	1	0	1	12.2222	0.185221	0
936	0	1	33	0	0	0	0	0	0	0	0	0	0	0	0	0	0	0	0	0	0	0	0	1	25.5556	0.255442	0
937	0	1	33	0	0	0	0	0	0	0	0	0	0	0	0	0	0	0	0	0	0	0	0	1	25.5556	0.255442	0
938	0	1	27	1	1	0	1	0	0	0	0	0	0	0	0	0	0	0	1	0	0	1	0	1	18.8889	0.218303	0
939	1	1	60	0	0	1	0	0	0	0	0	0	1	0	0	0	0	0	0	0	0	0	0	1	66.1378	0.545596	1
940	1	1	83	0	0	0	0	0	0	0	0	0	0	0	0	0	0	0	0	0	0	1	1	1	91.6934	0.725466	1
941	0	1	25	0	1	0	0	0	0	0	0	0	1	0	0	0	0	0	0	0	0	0	0	1	16.6667	0.206824	0
942	0	1	32	0	0	0	0	0	0	0	0	0	1	0	0	0	0	0	0	0	0	0	0	1	24.4444	0.248973	0
943	1	1	57	0	1	0	0	0	0	1	0	0	0	0	1	0	0	0	0	0	0	1	0	1	125.444	0.882212	1
944	1	1	58	0	0	0	0	0	0	0	0	0	0	1	0	0	0	0	0	0	0	0	0	1	73.4091	0.600451	1
945	0	1	37	0	0	0	0	0	0	0	0	0	0	0	0	0	0	0	0	0	0	0	0	1	30	0.282396	0
946	0	1	54	0	1	0	0	0	0	0	0	0	0	0	0	0	0	0	0	0	0	1	1	1	48.8889	0.413493	1
947	0	1	24	0	0	0	0	1	1	0	0	0	1	0	0	0	0	0	0	0	0	1	0	1	53.9459	0.451789	1
948	0	1	21	1	1	0	1	0	0	0	0	0	0	0	0	0	0	0	0	0	0	1	0	1	12.2222	0.185221	0
949	1	0	51	0	0	1	0	0	0	0	0	0	0	0	0	0	0	0	0	0	0	0	0	1	63.578	0.525946	1
950	0	1	25	0	0	0	0	0	0	0	0	0	0	0	0	0	0	0	0	0	0	0	0	1	16.6667	0.206824	0
951	0	1	48	0	0	1	0	0	0	0	0	0	0	0	0	0	0	0	0	0	0	0	0	1	42.2222	0.364628	0
952	1	0	74	0	0	0	0	0	0	0	0	1	0	0	1	0	0	0	0	0	0	1	0	1	103.256	0.79062	1
953	0	1	54	0	0	0	0	0	0	0	0	0	0	0	0	0	0	0	0	0	0	1	0	1	48.8889	0.413493	1
954	0	1	35	0	0	0	0	0	0	0	0	0	0	0	0	0	0	0	0	0	0	0	0	1	27.7778	0.268705	0
955	0	1	23	0	1	0	0	0	0	0	0	0	0	0	0	0	0	0	0	0	0	0	0	1	14.4444	0.195797	0
956	1	0	78	0	0	1	0	0	0	0	0	0	0	0	0	0	0	0	0	0	0	0	0	1	93.578	0.736899	1
957	1	1	33	0	0	0	0	0	0	0	0	1	0	0	0	0	0	0	0	0	0	1	0	1	50.2607	0.423798	1
958	1	0	68	0	0	1	0	0	0	0	0	0	0	0	0	0	0	0	0	0	0	0	0	1	82.4669	0.665285	1
959	1	1	48	0	0	1	0	0	0	0	0	0	1	0	1	0	0	0	0	0	0	0	0	1	52.8045	0.443078	1
960	0	1	37	0	0	0	0	0	0	0	0	0	0	0	0	0	0	0	0	0	0	0	0	1	30	0.282396	0
961	1	1	77	0	0	0	0	0	0	0	0	0	0	0	0	0	0	0	0	0	0	1	1	1	85.0267	0.682645	1
962	0	1	40	0	1	0	0	0	0	0	0	0	0	0	0	0	0	0	0	0	0	1	0	1	33.3333	0.303706	0
963	1	0	57	0	0	0	0	0	0	1	0	0	0	0	0	0	0	0	0	0	0	1	1	1	132.884	0.904063	1
964	0	0	48	1	1	0	1	0	0	0	0	0	0	0	0	0	0	0	0	0	0	0	0	1	49.6624	0.419295	1
965	1	1	18	0	0	0	0	0	0	0	0	0	0	0	0	0	0	0	0	0	0	0	0	1	19.4711	0.221385	0
966	0	1	53	0	0	0	0	0	0	0	0	0	0	0	0	0	0	0	0	0	0	0	0	1	47.7778	0.4052	1
967	0	1	35	1	1	0	0	0	0	0	1	0	0	0	0	0	0	0	0	0	0	0	0	1	27.7778	0.268705	0
968	0	1	31	0	0	0	0	0	0	0	0	0	0	0	0	0	0	0	0	0	0	0	0	1	23.3333	0.242615	0
969	1	1	24	0	0	0	0	0	0	0	1	0	0	0	0	0	0	0	0	0	0	0	0	1	26.1378	0.258875	0
970	0	0	39	0	0	0	0	0	0	0	1	0	0	0	0	0	0	0	0	0	0	0	0	1	39.6624	0.346525	0
971	1	0	37	0	0	1	0	0	0	0	0	0	0	0	0	0	0	0	0	0	0	0	0	1	48.0225	0.407022	1
972	0	1	34	0	0	0	0	0	0	0	0	0	0	0	0	0	0	0	0	0	0	0	0	1	26.6667	0.262019	0
973	0	1	32	0	0	0	0	0	0	0	0	0	0	0	0	0	0	0	0	0	0	0	0	1	24.4444	0.248973	0
974	0	1	34	1	0	0	0	0	0	0	1	0	0	0	1	0	0	0	0	0	0	0	0	1	26.6667	0.262019	0
975	1	1	58	0	0	0	0	0	1	0	0	1	0	0	0	0	0	0	0	0	0	1	1	1	78.0384	0.634191	1
976	0	0	33	0	0	0	0	0	0	0	0	0	0	0	0	0	0	0	0	0	0	0	0	1	32.9958	0.301507	0
977	0	1	39	0	0	0	0	0	0	0	0	0	0	0	0	0	0	0	0	0	0	0	0	1	32.2222	0.296502	0
978	1	0	52	0	0	0	0	0	1	0	0	0	1	1	0	0	0	0	0	0	0	1	0	1	74.1827	0.606165	1
979	1	0	66	0	0	0	0	0	0	0	0	0	0	1	0	0	0	0	0	0	0	1	0	1	89.7382	0.713284	1
980	0	1	56	0	0	0	0	0	0	0	0	0	0	0	0	0	0	0	0	0	0	0	0	1	51.1111	0.430221	1
981	0	1	22	1	0	0	0	0	0	0	0	0	0	1	0	0	0	0	0	0	0	0	0	1	22.8269	0.239754	0
982	1	0	72	0	0	0	0	0	0	0	0	0	1	0	0	0	0	0	0	0	0	1	0	1	86.9113	0.695112	1
983	1	0	60	0	0	0	0	0	0	0	0	0	0	0	0	0	0	0	0	0	1	1	0	1	73.578	0.601701	1
984	0	0	52	0	0	0	0	0	0	0	0	0	0	1	0	0	0	0	0	0	0	0	0	1	63.6004	0.526118	1
985	0	1	20	1	0	0	0	0	0	0	0	0	1	0	0	0	0	0	0	0	0	0	0	1	11.1111	0.1801	0
986	0	1	30	1	0	0	0	0	0	0	0	0	0	0	0	0	0	0	0	0	0	0	0	1	22.2222	0.236369	0
987	1	0	37	0	1	0	0	1	1	0	0	1	0	0	0	0	0	0	0	0	0	1	1	1	100.536	0.776378	1
988	0	1	24	0	0	0	0	0	0	0	0	0	0	0	0	0	0	0	0	0	0	0	0	1	15.5556	0.201254	0
989	0	1	34	0	0	0	0	0	0	0	0	0	0	0	0	0	0	0	0	0	0	1	0	1	26.6667	0.262019	0
990	0	1	22	0	0	0	0	0	0	0	1	0	0	0	0	0	0	0	0	0	0	0	0	1	13.3333	0.190453	0
991	0	0	28	0	0	0	0	0	0	0	0	0	0	0	0	0	0	0	0	0	0	1	0	1	27.4402	0.266662	0
992	0	1	20	0	0	0	0	0	0	0	0	0	0	0	0	0	0	0	0	0	0	0	0	1	11.1111	0.1801	0
993	1	0	53	0	0	0	0	0	0	0	0	0	0	0	0	0	0	0	0	0	0	0	0	1	65.8002	0.543012	1
994	1	0	55	0	0	1	0	0	0	0	0	0	0	1	0	0	0	0	0	0	0	1	1	1	77.516	0.630442	1
995	0	1	27	1	1	0	1	0	0	0	0	0	0	0	0	0	0	0	0	0	0	0	0	1	18.8889	0.218303	0
996	0	1	44	0	0	0	0	0	0	0	0	0	0	0	0	0	0	0	0	0	0	0	0	1	37.7778	0.333472	0
997	0	1	48	0	0	0	0	0	0	0	0	0	0	0	0	0	0	0	0	0	0	0	0	1	42.2222	0.364628	0
998	1	0	64	0	0	0	0	0	0	0	0	0	0	1	0	0	0	0	0	0	0	1	0	1	87.516	0.699053	1
999	0	1	31	0	0	0	0	0	0	0	0	0	0	0	0	0	0	0	0	0	0	0	0	1	23.3333	0.242615	0
1000	1	0	24	0	0	0	0	0	0	0	0	0	0	0	0	0	0	0	0	0	0	0	0	1	33.578	0.305305	0
1001	1	0	42	0	0	0	0	0	0	0	0	0	0	1	0	0	0	0	0	0	0	1	0	1	63.0715	0.522047	1
1002	0	1	28	0	0	0	0	0	0	0	0	0	0	0	0	0	0	0	0	0	0	0	0	1	20	0.224212	0
1003	0	0	38	0	0	0	0	0	0	0	0	0	0	0	0	0	0	0	0	0	0	1	0	1	38.5513	0.3388	0
1004	0	1	32	0	0	0	0	0	0	0	0	0	0	0	0	0	0	0	0	0	0	0	0	1	24.4444	0.248973	0
1005	1	0	70	0	0	0	0	0	0	0	0	0	0	0	0	0	0	0	0	0	0	1	0	1	84.6891	0.680383	1
1006	1	0	45	0	0	0	0	0	0	0	0	0	1	0	0	0	0	0	0	0	0	1	0	1	56.9113	0.474545	1
1007	0	1	30	0	0	0	0	0	0	0	0	0	0	0	0	0	0	0	0	0	0	0	0	1	22.2222	0.236369	0
1008	0	1	24	0	0	0	0	0	0	0	0	0	0	1	0	0	0	0	0	0	0	0	0	1	25.0491	0.25248	0
1009	0	1	26	0	0	0	0	0	0	0	0	0	0	0	0	0	0	0	0	0	0	0	0	1	17.7778	0.212507	0
1010	1	1	72	0	0	1	0	1	1	0	0	0	0	0	0	0	0	0	0	0	0	1	1	1	117.861	0.855635	1
1011	1	1	60	0	0	1	0	0	0	0	0	0	0	0	0	0	0	0	0	0	0	0	0	1	66.1378	0.545596	1
1012	0	1	26	1	0	0	0	0	0	0	0	0	0	0	0	0	0	0	0	0	0	0	0	1	17.7778	0.212507	0
1013	0	1	29	0	0	0	0	0	0	0	1	0	0	1	0	0	0	0	0	0	0	0	0	1	30.6046	0.286194	0
1014	1	0	63	0	0	1	0	0	0	0	0	0	0	1	0	0	0	0	0	0	0	1	0	1	86.4049	0.691789	1
1015	0	1	33	1	1	0	1	0	0	0	0	0	0	0	0	0	0	0	0	0	0	1	0	1	25.5556	0.255442	0
1016	0	1	33	0	0	1	0	0	0	0	1	0	0	0	0	0	0	0	0	0	0	1	0	1	25.5556	0.255442	0
1017	1	0	67	0	0	0	0	0	1	1	0	0	0	0	0	0	0	0	0	0	0	1	1	1	143.995	0.929967	1
1018	1	1	45	0	0	0	0	0	0	0	0	0	0	0	0	0	0	0	0	0	0	0	0	1	49.4711	0.417858	1
1019	0	1	38	0	1	0	0	0	0	0	0	0	0	0	0	0	0	0	0	0	0	0	0	1	31.1111	0.289398	0
1020	0	1	28	0	0	0	0	0	0	0	1	0	0	0	0	0	0	0	0	0	0	1	0	1	20	0.224212	0
1021	1	1	76	0	0	1	0	0	0	0	0	0	0	0	0	0	0	0	0	0	0	1	0	1	83.9156	0.675169	1
1022	0	1	38	0	0	0	0	0	0	0	1	0	0	0	0	0	0	0	0	0	0	0	0	1	31.1111	0.289398	0
1023	0	1	43	0	0	0	0	0	0	0	0	0	0	0	0	0	0	0	0	0	0	1	0	1	36.6667	0.325893	0
1024	0	1	29	1	0	0	0	0	0	0	0	0	0	0	0	0	0	0	1	0	0	0	0	1	21.1111	0.230234	0
1025	1	1	22	1	0	0	0	0	0	0	1	0	0	0	0	0	0	0	0	0	0	0	0	1	23.9156	0.245933	0
1026	1	1	66	0	0	0	0	0	0	0	0	0	0	0	0	0	0	0	0	0	0	0	0	1	72.8045	0.595965	1
1027	0	1	36	0	0	0	0	0	0	0	0	0	0	0	0	0	0	0	0	0	0	0	0	1	28.8889	0.275498	0
1028	0	1	25	1	0	0	0	0	0	0	0	0	0	0	0	0	0	0	0	0	0	0	0	1	16.6667	0.206824	0
1029	0	1	38	0	0	1	0	0	0	0	0	0	0	0	0	0	0	0	0	0	0	1	0	1	31.1111	0.289398	0
1030	0	1	36	0	0	0	0	0	0	0	0	0	0	0	0	0	0	0	0	0	0	0	0	1	28.8889	0.275498	0
1031	0	1	31	0	0	0	0	0	0	0	0	0	0	0	0	0	0	0	0	0	0	0	0	1	23.3333	0.242615	0
1032	1	1	70	0	0	0	0	0	0	0	0	0	0	0	1	0	0	0	0	0	0	1	1	1	77.2489	0.628519	1
1033	1	1	61	0	0	0	0	0	0	0	0	0	0	0	0	0	0	0	0	1	0	1	1	1	67.2489	0.554085	1
1034	0	1	28	0	0	0	0	0	0	0	0	0	0	0	0	0	0	0	0	0	0	0	0	1	20	0.224212	0
1035	0	1	48	0	0	0	0	0	0	0	0	0	0	0	0	0	0	0	0	0	1	1	0	1	42.2222	0.364628	0
1036	1	0	34	0	0	0	0	0	0	0	0	1	0	1	0	0	0	0	0	0	0	1	1	1	68.3055	0.562129	1
1037	1	0	59	1	0	0	0	0	0	0	0	0	0	0	0	0	0	0	0	0	0	1	1	1	72.4669	0.593453	1
1038	1	1	49	1	1	0	1	0	0	0	0	0	0	0	0	0	0	0	0	0	0	1	0	1	53.9156	0.451557	1
1039	0	1	41	1	1	0	0	0	0	0	0	0	0	0	0	0	0	0	0	0	0	1	0	1	34.4444	0.311007	0
1040	0	1	35	0	0	1	0	0	0	0	0	0	0	1	0	0	0	0	0	0	0	0	0	1	37.2713	0.330006	0
1041	0	0	77	0	0	0	0	0	0	0	0	0	0	0	0	0	0	0	0	0	0	1	0	1	81.8846	0.661271	1
1042	0	1	53	0	0	0	0	0	0	0	0	0	0	0	0	0	0	0	0	0	0	0	0	1	47.7778	0.4052	1
1043	0	1	35	1	0	0	0	0	0	0	0	0	0	0	0	0	0	0	0	0	0	0	0	1	27.7778	0.268705	0
1044	0	1	23	1	0	0	0	0	0	0	0	0	0	0	0	0	0	0	0	0	0	0	0	1	14.4444	0.195797	0
1045	0	1	37	0	0	0	0	0	0	0	0	0	0	0	0	0	0	0	0	0	0	1	0	1	30	0.282396	0
1046	1	1	75	0	0	0	0	0	0	0	0	0	0	0	0	0	0	0	0	0	0	1	0	1	82.8045	0.667602	1
1047	1	0	77	0	0	0	0	0	0	0	0	0	1	0	0	0	0	0	0	0	0	1	1	1	92.4669	0.730196	1
1048	0	1	23	0	0	0	0	0	0	0	1	0	0	0	0	0	0	0	0	0	0	1	0	1	14.4444	0.195797	0
1049	0	0	46	0	0	0	0	0	0	0	0	0	0	0	0	0	0	0	0	0	0	0	0	1	47.4402	0.402691	1
1050	1	1	54	0	0	0	0	0	0	0	0	0	0	0	0	0	0	0	0	0	1	1	0	1	59.4711	0.494277	1
1051	1	1	78	0	0	0	0	0	0	0	0	0	0	0	0	0	0	0	0	0	0	1	0	1	86.1378	0.690028	1
1052	1	0	16	0	0	1	0	0	0	0	0	0	0	0	0	0	0	0	0	0	0	1	0	1	24.6891	0.250388	0
1053	1	0	68	0	0	0	0	0	0	0	0	0	0	1	0	0	0	0	0	0	0	0	0	1	91.9604	0.727105	1
1054	1	1	32	0	0	0	1	0	0	0	1	0	0	0	0	0	0	0	0	0	0	1	0	1	35.0267	0.314871	0
1055	1	0	36	0	0	1	0	0	0	0	0	0	0	0	0	0	0	0	0	0	0	1	0	1	46.9113	0.398771	1
1056	1	0	57	0	0	0	0	0	1	0	0	0	0	0	0	0	0	0	0	0	0	1	0	1	70.2447	0.576803	1
1057	0	1	37	0	0	0	0	0	0	0	0	0	0	0	0	0	0	0	0	0	0	0	0	1	30	0.282396	0
1058	0	1	24	1	1	0	0	0	0	0	0	0	0	0	0	0	0	0	0	0	0	0	0	1	15.5556	0.201254	0
1059	0	0	28	1	1	0	1	0	0	0	0	1	0	0	0	0	0	0	0	0	0	0	0	1	41.563	0.359927	0
1060	1	0	60	0	0	0	0	0	0	0	0	0	0	0	1	0	0	0	0	0	0	1	0	1	73.578	0.601701	1
1061	1	1	27	0	0	0	0	0	0	0	0	0	0	0	0	0	0	0	0	0	0	0	0	1	29.4711	0.2791	0
1062	0	0	48	0	0	0	0	0	0	0	0	0	0	0	0	0	0	0	0	0	0	1	1	1	49.6624	0.419295	1
1063	1	0	57	0	0	0	0	0	0	0	0	0	0	1	0	0	0	0	0	0	0	1	1	1	79.7382	0.646276	1
1064	0	1	24	0	0	0	0	0	0	0	0	0	0	0	0	0	0	0	0	0	0	0	0	1	15.5556	0.201254	0
1065	1	1	33	0	0	0	0	0	0	0	0	0	1	0	0	0	0	0	0	0	0	0	0	1	36.1378	0.322317	0
1066	0	1	33	0	0	1	0	0	0	0	0	0	0	0	0	0	0	0	0	0	0	0	0	1	25.5556	0.255442	0
1067	0	1	37	0	0	0	0	0	0	0	1	0	0	0	0	0	0	0	0	0	0	0	0	1	30	0.282396	0
1068	0	1	47	0	0	0	0	0	0	0	0	0	0	1	0	0	0	0	0	0	0	0	0	1	50.6046	0.426393	1
1069	0	0	55	0	0	0	0	0	0	0	0	0	0	0	0	0	0	0	0	0	0	1	0	1	57.4402	0.478617	1
1070	1	0	78	0	0	0	0	0	0	0	0	0	0	0	0	0	0	0	0	0	0	1	0	1	93.578	0.736899	1
1071	0	1	45	1	1	0	1	0	0	0	0	0	0	0	0	0	0	0	0	0	0	0	0	1	38.8889	0.341138	0
1072	0	0	26	0	0	0	0	0	0	0	0	0	0	0	0	0	0	0	0	0	0	0	0	1	25.218	0.253465	0
1073	0	1	28	1	1	0	1	0	0	0	0	0	0	0	0	0	0	0	0	0	0	0	0	1	20	0.224212	0
1074	0	1	21	0	0	0	0	0	0	0	0	0	0	1	0	0	0	0	0	0	0	1	0	1	21.7158	0.233559	0
1075	1	0	47	0	0	0	0	0	0	0	0	0	0	0	0	0	0	0	0	0	0	0	0	1	59.1336	0.491672	1
1076	1	0	52	0	0	0	0	0	0	0	0	0	0	0	0	0	0	0	0	0	0	0	0	1	64.6891	0.534489	1
1077	0	1	31	0	0	1	0	0	0	0	0	0	0	0	0	0	0	0	0	0	0	1	0	1	23.3333	0.242615	0
1078	0	1	69	0	1	0	0	0	0	0	0	0	0	0	0	0	0	0	1	0	0	0	0	1	65.5555	0.541137	1
1079	1	1	54	0	0	0	0	0	0	0	0	0	0	0	0	0	0	0	0	0	0	1	0	1	59.4711	0.494277	1
1080	0	0	45	0	0	0	0	0	0	0	0	0	0	0	0	0	0	0	1	0	0	1	1	1	46.3291	0.39447	1
1081	1	1	68	0	0	0	0	0	0	0	0	1	0	0	0	0	0	0	0	0	0	0	0	1	89.1495	0.709554	1
1082	0	1	36	1	0	0	0	0	0	0	0	0	0	0	0	0	0	0	0	0	0	1	1	1	28.8889	0.275498	0
1083	0	1	38	0	0	0	0	0	0	0	0	0	0	0	0	0	0	0	0	0	0	0	0	1	31.1111	0.289398	0
1084	0	1	31	1	0	0	0	0	0	0	0	0	0	0	0	0	0	0	0	0	0	1	0	1	23.3333	0.242615	0
1085	0	0	78	1	1	0	1	0	0	0	0	0	0	0	0	0	0	0	0	0	0	1	1	1	82.9957	0.668911	1
1086	1	1	26	0	0	0	0	0	0	0	0	0	0	0	0	0	0	0	0	0	0	1	0	1	28.36	0.272252	0
1087	0	1	34	1	1	0	1	0	0	0	0	0	0	0	0	0	0	0	0	0	0	1	0	1	26.6667	0.262019	0
1088	1	1	64	1	1	0	1	0	0	0	0	0	0	1	0	0	0	0	1	0	0	1	1	1	80.0758	0.648654	1
1089	0	0	26	0	0	0	0	0	0	0	0	1	0	0	0	0	0	0	1	0	0	0	0	1	39.3408	0.344281	0
1090	1	0	62	0	0	1	0	0	0	0	0	0	1	0	1	0	0	0	0	0	0	1	0	1	75.8002	0.61802	1
1091	0	1	52	0	0	0	0	0	0	0	0	0	0	0	1	0	0	0	0	0	0	0	0	1	46.6667	0.396962	1
1092	0	0	40	0	0	0	0	0	0	0	0	0	0	0	0	0	0	0	0	0	0	1	0	1	40.7735	0.354332	0
1093	1	1	73	0	0	0	0	0	0	0	0	0	0	0	0	0	0	0	1	0	0	0	0	1	80.5823	0.652209	1
1094	1	0	78	0	0	0	0	0	0	0	0	0	0	1	0	0	0	0	0	0	0	0	0	1	103.072	0.789674	1
1095	0	1	41	0	0	0	0	0	0	0	0	0	0	0	0	0	0	0	0	0	0	1	0	1	34.4444	0.311007	0
1096	0	1	28	0	0	0	0	0	0	0	0	0	0	0	0	0	0	0	0	0	0	0	0	1	20	0.224212	0
1097	0	0	44	1	1	0	1	0	0	0	0	0	0	0	0	0	0	0	0	0	0	0	0	1	45.218	0.386308	1
1098	1	1	64	0	0	0	0	0	0	0	0	0	0	0	0	0	0	0	1	0	0	1	1	1	70.5823	0.579345	1
1099	1	0	67	0	0	1	0	0	0	0	0	0	0	0	0	0	0	0	0	0	0	1	0	1	81.3558	0.657605	1
1100	1	0	68	0	0	0	0	0	0	0	0	0	0	0	0	0	0	0	0	0	0	0	0	1	82.4669	0.665285	1
1101	0	1	26	1	1	0	0	0	0	0	0	0	0	0	0	0	0	0	0	0	0	0	0	1	17.7778	0.212507	0
1102	0	1	22	1	1	0	0	0	0	0	1	0	0	0	0	0	0	0	0	0	0	0	0	1	13.3333	0.190453	0
1103	1	0	55	0	0	0	0	0	0	0	1	0	0	0	0	0	0	0	0	0	0	0	0	1	68.0225	0.559977	1
1104	1	1	84	0	0	0	1	0	0	0	0	1	0	0	0	0	0	0	0	0	0	1	1	1	106.927	0.808761	1
1105	1	0	55	0	0	1	0	0	0	0	0	0	0	0	0	0	0	0	0	0	0	0	0	1	68.0225	0.559977	1
1106	1	0	65	0	0	0	0	0	0	0	0	0	0	1	0	0	0	0	0	0	0	1	0	1	88.6271	0.706219	1
1107	0	1	25	0	0	0	0	0	0	0	0	0	0	0	0	0	0	0	0	0	0	0	0	1	16.6667	0.206824	0
1108	0	0	21	0	0	0	0	0	0	0	1	0	0	1	0	0	0	0	0	0	0	0	0	1	29.156	0.277146	0
1109	1	1	49	0	0	0	0	0	0	0	0	0	0	0	0	0	0	0	0	0	0	0	0	1	53.9156	0.451557	1
1110	1	0	83	0	0	0	0	0	0	0	0	0	0	0	0	0	0	0	0	0	0	1	0	1	99.1336	0.768774	1
1111	1	1	27	0	0	0	0	0	0	0	0	0	1	0	1	0	0	0	0	0	0	0	0	1	29.4711	0.2791	0
1112	0	1	26	0	0	0	0	0	0	0	0	0	0	0	0	0	0	0	0	0	0	1	0	1	17.7778	0.212507	0
1113	1	0	47	1	1	0	1	0	0	0	0	0	0	0	0	0	0	0	0	0	0	1	1	1	59.1336	0.491672	1
1114	1	1	42	0	0	0	0	0	0	0	0	0	0	0	0	0	0	0	0	0	0	0	0	1	46.1378	0.39306	1
1115	1	1	38	0	0	0	0	0	0	0	0	0	0	0	0	0	0	0	0	0	0	0	0	1	41.6934	0.360855	0
1116	0	1	22	1	0	0	1	0	0	0	0	0	0	0	0	0	0	0	0	0	0	0	0	1	13.3333	0.190453	0
1117	0	1	20	0	0	0	0	0	0	0	0	0	0	0	1	0	0	0	0	0	0	1	0	1	11.1111	0.1801	0
1118	1	1	84	0	0	0	0	0	0	0	0	1	0	0	0	0	0	1	0	0	0	0	0	1	106.927	0.808761	1
1119	0	1	44	0	0	0	0	0	0	0	0	0	0	0	0	0	0	0	0	0	0	1	0	1	37.7778	0.333472	0
1120	1	0	66	0	0	0	0	0	0	0	0	0	0	0	0	0	0	0	0	0	0	1	0	1	80.2447	0.649842	1
1121	0	1	69	0	0	0	0	0	0	0	0	0	1	1	0	0	0	0	0	0	0	0	0	1	75.0491	0.612531	1
1122	1	0	74	0	0	0	0	0	0	0	0	0	0	1	0	0	1	0	0	0	0	1	0	1	98.6271	0.765984	1
1123	1	0	57	0	0	1	0	0	0	0	0	0	0	0	0	0	0	0	0	0	0	0	0	1	70.2447	0.576803	1
1124	1	0	25	0	0	0	0	0	0	0	0	0	1	0	0	0	0	0	0	0	0	1	0	1	34.6891	0.312628	0
1125	1	0	69	0	0	0	0	0	0	0	0	0	0	0	0	0	0	0	0	0	0	0	0	1	83.578	0.672879	1
1126	0	1	25	0	0	0	0	0	0	0	0	0	0	1	0	0	0	0	0	0	0	0	0	1	26.1602	0.259007	0
1127	1	0	70	0	0	1	0	0	0	0	0	0	0	0	0	0	0	0	0	0	0	1	0	1	84.6891	0.680383	1
1128	1	0	47	0	0	0	0	0	0	0	0	0	0	0	1	0	0	0	0	0	0	0	0	1	59.1336	0.491672	1
1129	0	1	52	0	0	0	0	0	0	0	0	1	0	0	0	0	0	0	1	0	0	1	0	1	60.7895	0.50445	1
1130	1	1	40	0	0	0	0	0	0	0	0	0	0	0	0	0	0	0	0	0	0	0	0	1	43.9156	0.376822	0
1131	0	0	48	0	0	0	1	0	0	0	0	0	0	0	0	0	0	0	0	0	0	1	1	1	49.6624	0.419295	1
1132	0	1	24	1	1	0	1	0	0	0	1	0	0	1	0	0	0	0	0	0	0	0	0	1	25.0491	0.25248	0
1133	0	1	26	0	0	0	0	0	0	0	1	0	0	0	0	0	0	0	0	0	0	0	0	1	17.7778	0.212507	0
1134	0	1	25	0	0	0	0	0	0	0	0	0	0	0	0	0	0	0	0	0	0	0	0	1	16.6667	0.206824	0
1135	1	1	74	1	1	0	1	0	0	0	0	0	0	0	0	0	0	0	0	0	0	1	1	1	81.6934	0.659948	1
1136	1	1	62	0	0	0	0	0	0	0	0	0	0	0	0	0	0	0	0	0	0	0	0	1	68.36	0.562543	1
1137	0	1	43	0	1	0	0	0	0	0	0	0	0	0	0	0	0	0	0	0	0	0	0	1	36.6667	0.325893	0
1138	0	0	54	0	0	0	0	0	0	0	1	0	0	1	0	0	0	0	0	0	0	0	0	1	65.8226	0.543183	1
1139	1	0	74	0	0	0	0	0	0	0	0	0	0	0	0	0	0	0	0	0	0	0	0	1	89.1336	0.709452	1
1140	0	1	28	0	0	0	0	0	0	0	0	0	0	0	0	0	0	0	0	0	0	0	0	1	20	0.224212	0
1141	0	0	21	0	0	0	0	0	0	0	0	0	0	0	0	0	0	0	0	0	0	0	0	1	19.6624	0.222405	0
1142	0	0	33	0	0	0	0	0	0	0	0	0	0	0	0	0	0	0	0	0	0	0	0	1	32.9958	0.301507	0
1143	0	1	23	0	0	0	0	0	0	0	1	0	0	0	0	0	0	0	0	0	0	0	0	1	14.4444	0.195797	0
1144	1	0	65	0	0	0	0	0	0	0	0	0	0	0	0	0	0	0	0	0	0	1	1	1	79.1336	0.641998	1
1145	1	1	28	0	0	0	0	0	0	0	0	1	0	0	0	0	0	0	0	0	0	0	0	1	44.7051	0.382561	0
1146	0	1	33	1	1	0	0	0	0	0	0	0	0	0	0	0	0	0	0	0	0	1	0	1	25.5556	0.255442	0
1147	0	1	54	0	0	0	0	0	0	0	0	0	0	0	0	0	0	0	0	0	0	0	0	1	48.8889	0.413493	1
1148	1	1	31	0	0	0	0	0	0	0	0	0	0	0	0	0	0	0	0	0	0	0	0	1	33.9156	0.30752	0
1149	0	1	23	0	0	0	0	0	0	0	0	0	0	0	0	0	0	1	0	0	0	0	0	1	14.4444	0.195797	0
1150	0	1	35	0	0	0	0	0	0	0	1	0	0	0	0	0	0	0	0	0	0	0	0	1	27.7778	0.268705	0
1151	0	1	27	0	0	0	0	0	0	0	0	0	0	0	0	0	0	0	0	0	0	0	0	1	18.8889	0.218303	0
1152	0	1	28	1	1	0	1	0	0	0	0	0	0	0	0	0	0	0	0	0	0	0	0	1	20	0.224212	0
1153	0	1	26	0	0	0	0	0	0	0	0	0	0	0	0	0	0	0	0	0	0	1	0	1	17.7778	0.212507	0
1154	1	0	57	0	0	1	0	0	0	0	0	1	0	1	0	0	0	0	0	0	0	1	0	1	93.8611	0.73859	1
1155	0	1	25	0	0	0	0	0	0	0	0	0	0	0	0	0	0	0	0	0	0	0	0	1	16.6667	0.206824	0
1156	0	1	41	0	0	0	0	0	0	0	0	0	1	0	0	0	0	0	0	0	0	0	0	1	34.4444	0.311007	0
1157	1	0	22	0	0	0	0	0	0	0	1	0	0	0	0	0	0	0	0	0	0	0	0	1	31.3558	0.290954	0
1158	1	0	34	0	0	0	0	0	0	0	0	0	0	0	0	0	0	0	0	0	0	0	0	1	44.6891	0.382445	0
1159	0	1	24	0	0	0	0	0	1	0	1	0	0	0	0	0	0	0	0	0	0	0	0	1	15.5556	0.201254	0
1160	0	1	44	0	0	0	0	0	0	0	0	0	0	0	0	0	0	0	0	0	0	1	0	1	37.7778	0.333472	0
1161	1	1	33	0	1	0	0	0	0	0	0	0	0	0	0	0	0	0	0	0	0	1	0	1	36.1378	0.322317	0
1162	0	1	34	1	1	0	1	0	0	0	0	0	1	0	0	0	0	0	0	0	0	0	0	1	26.6667	0.262019	0
1163	1	0	69	0	0	0	0	0	0	0	0	0	0	0	0	0	0	0	0	0	0	1	1	1	83.578	0.672879	1
1164	0	0	54	0	0	0	0	0	0	0	0	0	0	0	0	0	0	0	0	0	0	0	0	1	56.3291	0.470065	1
1165	0	1	39	0	0	0	1	0	0	0	0	1	0	0	0	0	0	0	0	0	0	1	0	1	46.3451	0.394588	1
1166	1	1	26	1	0	0	0	0	0	0	0	0	0	0	0	0	0	0	0	0	0	0	0	1	28.36	0.272252	0
1167	1	1	35	1	1	0	1	0	0	0	0	1	0	0	0	0	0	0	0	0	0	1	1	1	52.4829	0.44063	1
1168	1	0	63	0	0	0	0	0	0	0	0	0	0	0	0	0	0	0	0	0	0	0	0	1	76.9113	0.626083	1
1169	1	1	21	0	0	0	0	0	0	0	0	0	0	0	1	0	0	0	0	0	0	0	0	1	22.8045	0.239628	0
1170	0	1	35	0	0	0	0	0	0	0	0	0	0	0	0	0	0	0	0	0	0	0	0	1	27.7778	0.268705	0
1171	1	0	56	0	0	0	0	0	0	0	0	0	0	0	0	0	0	0	0	0	0	0	0	1	69.1336	0.56841	1
1172	1	1	84	0	0	0	0	0	0	0	0	0	0	0	0	0	0	0	0	0	0	1	1	1	92.8045	0.732244	1
1173	0	1	20	1	1	0	1	0	0	0	0	0	0	0	0	0	0	0	0	0	0	0	0	1	11.1111	0.1801	0
1174	0	0	25	0	0	0	0	0	0	0	0	0	0	0	0	0	0	0	0	0	0	0	0	1	24.1069	0.24703	0
1175	0	0	65	0	0	1	0	0	0	0	0	0	0	0	0	0	0	0	0	0	0	0	0	1	68.5513	0.563995	1
1176	0	1	41	0	0	0	0	0	0	0	0	0	0	0	0	0	0	0	0	0	0	0	0	1	34.4444	0.311007	0
1177	1	1	22	1	1	0	1	0	1	0	1	0	0	0	0	0	0	0	1	0	0	1	1	1	23.9156	0.245933	0
1178	0	1	25	0	0	0	0	0	0	0	1	0	0	0	1	0	0	0	0	0	0	0	0	1	16.6667	0.206824	0
1179	0	1	40	0	0	0	0	0	0	0	0	0	0	0	0	0	0	0	0	0	0	0	0	1	33.3333	0.303706	0
1180	0	1	33	0	0	0	0	0	0	0	0	0	0	0	0	0	0	0	0	0	0	1	0	1	25.5556	0.255442	0
1181	0	1	31	0	0	0	0	0	0	0	1	0	0	0	0	0	0	0	0	0	0	0	0	1	23.3333	0.242615	0
1182	0	1	22	1	1	0	0	0	0	0	0	0	1	0	0	0	0	0	0	0	0	0	0	1	13.3333	0.190453	0
1183	1	0	65	0	0	0	0	0	0	0	1	0	0	0	1	0	0	0	0	0	0	1	0	1	79.1336	0.641998	1
1184	0	1	28	1	1	0	1	0	0	0	0	0	0	0	0	0	0	0	0	0	0	1	0	1	20	0.224212	0
1185	0	1	26	0	0	1	0	0	0	0	0	0	0	0	0	0	0	0	0	0	0	0	0	1	17.7778	0.212507	0
1186	1	0	41	0	0	0	0	0	0	0	0	0	0	1	0	0	0	0	0	0	0	1	0	1	61.9604	0.513483	1
1187	1	0	70	0	0	1	0	0	0	0	0	0	0	1	0	0	0	0	0	0	0	1	1	1	94.1827	0.740502	1
1188	1	1	59	0	0	0	0	0	0	0	0	0	1	0	0	0	0	0	0	0	0	1	0	1	65.0267	0.537081	1
1189	0	1	23	0	0	0	0	0	0	0	0	0	0	0	0	0	0	0	0	0	0	0	0	1	14.4444	0.195797	0
1190	0	1	41	0	0	0	0	0	0	0	1	0	0	0	0	0	0	0	0	0	0	0	0	1	34.4444	0.311007	0
1191	0	1	22	0	0	0	0	0	0	0	1	0	0	0	0	0	0	0	0	0	0	0	0	1	13.3333	0.190453	0
1192	0	1	40	0	0	0	0	0	0	0	0	0	0	0	0	0	0	0	0	0	0	0	0	1	33.3333	0.303706	0
1193	0	1	48	0	0	0	0	0	0	1	0	0	0	0	0	0	0	0	0	0	0	1	0	1	104.862	0.798704	1
1194	1	0	48	0	0	0	0	0	0	0	0	0	0	1	0	0	0	0	0	0	0	1	0	1	69.7382	0.572982	1
1195	1	1	45	0	0	0	0	0	0	0	0	0	0	0	0	0	0	0	0	0	0	1	0	1	49.4711	0.417858	1
1196	1	0	61	0	0	0	0	0	0	0	0	0	1	0	0	0	0	0	0	0	0	1	0	1	74.6891	0.609891	1
1197	0	1	41	0	0	1	0	0	0	0	1	0	0	0	0	0	0	0	0	0	0	0	0	1	34.4444	0.311007	0
1198	1	1	68	0	0	0	0	0	0	0	0	0	0	0	0	0	0	0	0	0	0	0	0	1	75.0267	0.612367	1
1199	0	1	35	0	0	0	0	0	0	0	0	0	0	0	0	0	0	0	0	0	0	0	0	1	27.7778	0.268705	0
1200	1	1	20	0	0	0	1	0	0	0	1	0	0	0	0	0	0	0	0	0	0	1	0	1	21.6934	0.233435	0
1201	1	1	33	0	0	0	0	0	0	0	0	0	0	0	0	0	0	0	0	0	0	0	0	1	36.1378	0.322317	0
1202	1	0	22	0	0	0	0	0	0	0	0	0	0	0	0	0	0	0	0	0	0	0	0	1	31.3558	0.290954	0
1203	0	1	44	0	0	0	0	0	0	0	0	0	0	0	0	0	0	0	0	0	0	1	0	1	37.7778	0.333472	0
1204	1	1	42	1	1	0	1	0	0	0	0	0	0	1	0	0	0	0	0	0	0	0	0	1	55.6313	0.464704	1
1205	0	1	43	0	0	0	0	0	0	0	0	0	0	0	0	0	0	0	0	0	0	1	0	1	36.6667	0.325893	0
1206	1	1	65	1	0	0	0	0	0	0	0	0	0	1	0	0	0	0	0	0	0	0	0	1	81.1869	0.656431	1
1207	0	1	48	0	0	0	0	0	0	0	0	0	0	0	0	0	0	0	0	0	0	0	0	1	42.2222	0.364628	0
1208	0	1	39	0	0	0	0	0	0	0	0	0	0	0	0	0	0	0	0	0	0	0	0	1	32.2222	0.296502	0
1209	0	1	24	0	0	0	0	0	0	0	0	0	0	0	0	0	0	0	0	0	0	0	0	1	15.5556	0.201254	0
1210	1	1	61	0	0	0	0	0	0	0	0	0	0	0	0	0	0	0	0	0	0	0	0	1	67.2489	0.554085	1
1211	0	0	24	1	1	0	0	0	0	0	0	0	0	0	0	0	0	0	0	0	0	0	0	1	22.9958	0.240706	0
1212	1	0	81	0	0	0	0	0	0	0	0	1	0	1	0	0	0	0	0	0	0	1	0	1	120.528	0.865506	1
1213	0	1	24	0	0	0	0	1	1	0	1	0	0	0	0	0	0	0	0	0	0	0	0	1	53.9459	0.451789	1
1214	0	1	31	0	0	0	0	0	0	0	0	0	0	1	0	0	0	0	0	0	0	0	0	1	32.8269	0.30041	0
1215	1	0	55	0	0	1	0	0	0	0	0	0	0	0	0	0	0	0	0	0	0	0	0	1	68.0225	0.559977	1
1216	0	1	34	0	0	0	0	0	0	0	0	0	0	0	0	0	0	0	0	0	0	0	0	1	26.6667	0.262019	0
1217	0	1	26	1	1	0	1	0	0	0	1	0	0	0	0	0	0	0	0	0	0	0	0	1	17.7778	0.212507	0
1218	0	1	42	0	0	0	0	0	0	0	0	0	0	0	0	0	0	0	0	0	0	0	0	1	35.5556	0.318404	0
1219	0	1	34	0	0	0	0	0	0	0	0	0	0	0	0	0	0	0	0	0	0	0	0	1	26.6667	0.262019	0
1220	1	0	49	0	0	0	0	0	0	0	0	0	1	0	0	0	0	0	0	0	0	1	1	1	61.3558	0.50882	1
1221	1	1	74	0	0	0	1	0	0	0	0	0	0	0	0	0	0	0	0	0	0	0	0	1	81.6934	0.659948	1
1222	1	1	50	1	1	0	1	0	0	0	1	0	0	0	0	0	0	0	0	0	0	1	0	1	55.0267	0.460064	1
1223	1	1	41	1	1	0	1	0	0	0	0	0	0	1	0	0	0	0	0	0	0	1	1	1	54.5202	0.456183	1
1224	1	0	58	1	0	0	0	0	0	0	0	0	0	0	0	0	0	0	0	0	0	0	0	1	71.3558	0.585152	1
1225	0	1	40	0	0	0	0	0	0	0	0	0	0	0	0	0	0	0	0	0	0	1	0	1	33.3333	0.303706	0
1226	1	0	70	0	0	0	0	0	0	0	0	0	0	0	0	0	0	0	0	0	0	1	0	1	84.6891	0.680383	1
1227	0	0	43	0	0	0	0	0	0	0	0	0	0	1	0	0	0	0	0	0	0	1	1	1	53.6004	0.449149	1
1228	0	1	18	0	0	0	0	0	0	0	0	0	0	1	0	0	0	0	0	0	0	0	0	1	18.3824	0.215647	0
1229	0	1	32	1	0	0	0	0	0	0	0	0	0	0	0	0	0	0	0	0	0	0	0	1	24.4444	0.248973	0
1230	1	1	29	0	0	1	0	0	0	0	0	0	0	0	0	0	0	0	0	0	0	0	0	1	31.6934	0.293108	0
1231	1	1	34	0	0	0	0	0	0	0	0	0	0	0	0	0	0	0	0	0	0	0	0	1	37.2489	0.329854	0
1232	1	1	61	0	0	1	0	0	0	0	0	0	0	0	0	0	0	0	0	0	0	1	0	1	67.2489	0.554085	1
1233	0	0	45	0	0	0	0	0	0	0	1	0	0	1	0	0	0	0	0	0	0	1	0	1	55.8226	0.466173	1
1234	0	0	47	0	0	0	0	0	0	0	0	0	0	1	0	0	0	0	0	0	0	1	0	1	58.0448	0.483276	1
1235	0	1	28	0	0	1	0	0	0	0	0	0	0	0	0	0	0	0	0	0	0	0	0	1	20	0.224212	0
1236	1	1	37	0	0	0	0	0	0	0	0	0	0	1	0	0	0	0	0	0	0	1	0	1	50.0758	0.422405	1
1237	1	1	67	0	0	0	0	0	0	0	0	1	0	0	0	0	0	0	0	0	0	1	1	1	88.0384	0.702435	1
1238	0	1	50	0	0	0	0	0	0	0	1	0	0	0	0	0	0	0	0	0	0	1	0	1	44.4444	0.380663	0
1239	1	0	64	0	0	0	0	0	0	0	0	0	0	1	0	0	0	0	0	0	0	1	0	1	87.516	0.699053	1
1240	0	1	37	0	0	0	0	0	0	0	0	0	0	0	0	0	0	0	0	0	0	0	0	1	30	0.282396	0
1241	0	1	33	0	0	1	0	0	0	0	0	0	0	0	0	0	0	0	0	0	0	0	0	1	25.5556	0.255442	0
1242	1	1	59	0	0	0	0	1	1	0	0	0	0	0	1	1	0	1	0	0	0	1	1	1	103.417	0.79144	1
1243	1	1	74	0	0	0	0	0	0	0	0	0	0	0	0	0	0	0	0	0	0	1	0	1	81.6934	0.659948	1
1244	0	0	30	0	0	0	0	0	0	0	0	0	0	0	0	0	0	0	0	0	0	0	0	1	29.6624	0.280289	0
1245	1	0	67	0	0	1	0	0	0	0	0	0	0	0	0	0	0	0	0	0	0	1	0	1	81.3558	0.657605	1
1246	0	0	40	0	0	0	0	0	0	0	0	0	0	1	0	0	0	0	0	0	0	1	0	1	50.2671	0.423846	1
1247	0	1	32	0	0	0	0	0	0	0	0	0	0	0	0	0	0	0	0	0	0	0	0	1	24.4444	0.248973	0
1248	0	1	25	0	0	0	0	0	0	0	0	1	0	0	0	0	0	0	0	0	0	0	0	1	30.7895	0.287361	0
1249	0	1	47	0	0	0	0	0	0	0	0	0	0	0	0	0	0	0	0	0	0	0	0	1	41.1111	0.35672	0
1250	0	1	41	0	0	0	0	0	0	0	0	0	0	0	0	0	0	0	0	0	0	0	0	1	34.4444	0.311007	0
1251	0	1	34	1	1	0	1	0	0	0	0	0	0	0	0	0	0	0	0	0	0	0	0	1	26.6667	0.262019	0
1252	1	0	52	0	0	0	0	0	0	0	0	0	1	0	0	0	0	0	0	0	0	0	0	1	64.6891	0.534489	1
1253	0	1	47	0	0	0	0	0	0	0	0	0	0	0	0	0	0	0	0	0	0	0	0	1	41.1111	0.35672	0
1254	0	1	59	1	1	0	1	0	0	0	0	0	0	0	0	0	0	0	0	0	0	0	0	1	54.4444	0.455603	1
1255	0	1	35	1	0	0	0	0	0	0	0	0	0	0	0	0	0	0	0	0	0	0	0	1	27.7778	0.268705	0
1256	1	1	44	1	1	0	1	0	0	0	0	0	0	1	0	0	0	0	0	0	0	0	0	1	57.8536	0.481802	1
1257	0	1	27	0	0	0	0	0	0	0	0	0	0	0	0	0	0	0	0	0	0	0	0	1	18.8889	0.218303	0
1258	1	1	53	0	0	0	0	0	0	0	0	0	0	0	0	0	0	0	0	0	0	0	0	1	58.36	0.485706	1
1259	0	1	19	1	1	0	0	0	0	0	0	0	0	0	0	0	0	0	0	0	0	0	0	1	10	0.175091	0
1260	1	1	75	0	0	0	0	0	0	0	0	0	0	1	0	0	0	0	0	0	0	0	0	1	92.298	0.729168	1
1261	0	1	22	1	1	0	0	0	0	0	0	0	0	0	0	0	0	0	0	0	0	0	0	1	13.3333	0.190453	0
1262	1	1	21	1	1	0	1	0	0	0	0	0	0	0	0	0	0	0	0	0	0	0	0	1	22.8045	0.239628	0
1263	0	0	41	0	0	0	0	0	0	0	0	0	0	0	0	0	0	0	0	0	0	0	0	1	41.8846	0.362217	0
1264	0	1	41	0	1	0	0	0	0	0	0	0	0	1	0	0	0	0	0	0	0	1	0	1	43.938	0.376984	0
1265	1	1	55	0	0	1	0	0	0	0	0	0	0	0	0	0	0	0	0	0	0	1	0	1	60.5823	0.502851	1
1266	1	0	50	0	0	0	0	0	0	0	0	0	0	0	0	0	0	0	0	0	0	1	0	1	62.4669	0.517388	1
1267	0	1	28	0	0	0	0	0	0	0	0	0	0	0	0	0	0	0	0	0	0	0	0	1	20	0.224212	0
1268	1	0	48	0	0	0	0	0	0	0	0	0	0	0	0	0	0	0	0	0	0	0	0	1	60.2447	0.500246	1
1269	1	0	52	0	0	0	0	0	0	0	0	0	0	1	0	0	0	0	0	0	0	0	0	1	74.1827	0.606165	1
1270	1	0	74	0	0	1	0	0	0	0	0	0	1	0	0	0	0	0	0	0	0	1	1	1	89.1336	0.709452	1
1271	0	1	31	0	0	0	0	0	0	0	0	0	0	0	0	0	0	0	0	0	0	0	0	1	23.3333	0.242615	0
1272	0	0	49	0	0	0	0	0	0	0	0	0	0	0	0	0	0	0	0	0	0	1	0	1	50.7735	0.427668	1
1273	1	1	78	0	0	0	0	0	0	0	0	0	0	0	0	0	0	0	0	0	0	1	0	1	86.1378	0.690028	1
1274	0	0	42	0	0	0	0	0	0	0	0	0	1	0	0	0	0	0	0	0	0	0	0	1	42.9958	0.370178	0
1275	0	1	25	0	0	1	0	0	0	0	0	0	0	0	0	0	0	0	0	0	0	0	0	1	16.6667	0.206824	0
1276	0	1	33	0	0	1	0	0	0	0	0	0	1	0	0	0	0	0	0	0	0	0	0	1	25.5556	0.255442	0
1277	0	1	37	0	0	0	0	0	0	0	0	0	0	0	0	0	0	0	0	0	0	0	0	1	30	0.282396	0
1278	1	1	60	0	0	0	0	0	0	0	0	0	0	0	0	0	0	0	0	0	0	1	0	1	66.1378	0.545596	1
1279	1	0	33	0	0	1	0	0	0	0	0	0	0	0	0	0	0	0	0	0	0	0	0	1	43.578	0.374378	0
1280	1	1	69	0	1	0	1	0	0	0	0	0	0	0	0	0	0	0	0	0	0	1	0	1	76.1378	0.620477	1
1281	1	1	56	0	0	0	0	0	0	0	0	0	0	0	0	0	0	0	0	0	0	0	0	1	61.6934	0.511424	1
1282	0	1	22	0	0	0	0	0	0	0	0	0	0	0	0	0	0	0	0	0	0	0	0	1	13.3333	0.190453	0
1283	1	1	75	0	0	0	0	0	0	0	0	0	0	0	0	0	0	1	0	0	0	1	0	1	82.8045	0.667602	1
1284	0	1	26	1	0	0	0	0	0	0	0	0	0	0	0	0	0	0	0	0	0	0	0	1	17.7778	0.212507	0
1285	1	1	69	0	0	0	0	0	0	0	0	0	0	0	0	0	0	0	0	0	0	1	0	1	76.1378	0.620477	1
1286	0	1	28	1	1	0	1	0	1	0	0	0	0	0	0	0	0	0	0	0	0	0	0	1	20	0.224212	0
1287	0	0	74	0	0	1	0	0	0	0	0	0	0	0	0	0	0	0	0	0	0	1	0	1	78.5513	0.637856	1
1288	0	1	56	0	0	0	0	0	0	0	0	0	0	0	0	0	0	0	0	0	0	1	0	1	51.1111	0.430221	1
1289	0	1	23	0	0	0	0	0	0	0	1	0	0	0	0	0	0	0	0	0	0	0	0	1	14.4444	0.195797	0
1290	1	0	32	0	0	0	0	0	0	0	0	0	0	0	0	0	0	0	0	0	0	0	0	1	42.4669	0.36638	0
1291	1	1	58	0	0	0	0	0	0	0	0	0	0	0	1	0	0	0	0	0	0	1	0	1	63.9156	0.528543	1
1292	1	1	78	0	0	0	0	0	0	0	0	0	0	0	0	0	0	0	0	0	0	0	0	1	86.1378	0.690028	1
1293	1	0	40	0	0	1	0	0	0	0	0	0	1	0	0	0	0	0	0	0	0	1	0	1	51.3558	0.432073	1
1294	0	0	21	1	1	0	1	0	0	0	0	0	0	0	0	0	0	0	0	0	0	1	0	1	19.6624	0.222405	0
1295	1	1	43	0	0	1	0	0	0	0	0	0	0	0	0	0	0	0	0	0	1	1	0	1	47.2489	0.401272	1
1296	1	0	71	0	0	1	0	0	0	0	0	0	0	0	0	0	0	0	0	0	0	0	0	1	85.8002	0.687795	1
1297	0	0	22	1	1	0	1	0	0	0	0	0	0	0	0	0	0	0	0	0	0	1	0	1	20.7735	0.228393	0
1298	0	0	36	0	0	0	0	0	0	0	0	0	0	0	0	0	0	0	0	0	0	0	0	1	36.3291	0.323608	0
1299	0	0	53	0	0	0	0	0	0	0	0	0	0	0	0	0	0	0	0	0	0	1	0	1	55.218	0.461531	1
1300	1	0	90	0	0	0	0	0	0	1	0	0	0	0	1	0	0	0	0	0	0	1	1	1	169.551	0.966915	1
1301	0	0	29	0	0	0	0	0	0	0	0	0	0	0	0	0	0	0	0	0	0	1	0	1	28.5513	0.273423	0
1302	1	1	58	0	0	0	0	0	0	0	0	0	0	1	0	0	0	0	1	0	0	1	0	1	73.4091	0.600451	1
1303	0	1	21	1	0	0	0	0	0	0	0	0	0	0	1	0	0	0	0	0	0	0	0	1	12.2222	0.185221	0
1304	0	1	34	0	0	0	0	0	0	0	0	0	0	1	0	0	0	0	0	0	0	0	0	1	36.1602	0.322468	0
1305	0	1	33	0	0	0	0	0	1	0	0	0	0	0	0	0	0	0	0	0	0	1	0	1	25.5556	0.255442	0
1306	1	1	63	0	0	0	0	0	0	0	0	0	0	0	0	0	0	0	0	0	0	0	0	1	69.4711	0.570964	1
1307	0	1	39	0	1	0	0	0	0	0	0	0	0	0	0	0	0	0	0	0	0	0	0	1	32.2222	0.296502	0
1308	1	0	77	0	0	0	0	0	0	0	0	0	0	1	0	0	0	0	0	0	0	1	1	1	101.96	0.783921	1
1309	0	1	34	0	0	0	0	0	0	0	0	0	0	0	0	0	0	0	0	0	0	0	0	1	26.6667	0.262019	0
1310	1	1	52	0	0	0	0	0	0	1	0	0	0	1	0	0	0	0	0	0	0	1	1	1	129.382	0.894269	1
1311	0	1	37	0	0	0	0	0	0	0	1	0	0	0	0	0	0	0	0	0	0	0	0	1	30	0.282396	0
1312	1	0	48	0	0	0	0	0	0	0	0	0	0	1	0	0	0	0	0	0	0	1	0	1	69.7382	0.572982	1
1313	1	0	75	0	0	0	0	0	0	0	0	0	0	1	0	0	0	0	0	0	0	1	0	1	99.7382	0.772076	1
1314	1	0	55	0	0	0	0	0	0	0	0	0	0	0	0	0	0	0	0	0	0	1	0	1	68.0225	0.559977	1
1315	1	0	64	0	0	0	0	0	0	0	0	0	0	0	0	0	0	0	1	0	0	0	0	1	78.0225	0.634077	1
1316	1	0	74	0	0	0	0	0	0	0	0	1	0	0	0	0	0	0	0	0	0	0	0	1	103.256	0.79062	1
1317	0	1	25	0	0	0	0	0	0	0	0	0	0	0	0	0	0	0	0	0	0	0	0	1	16.6667	0.206824	0
1318	1	0	33	0	0	1	0	1	1	0	1	0	0	0	0	0	0	0	0	0	0	1	1	1	81.9683	0.66185	1
1319	0	1	40	0	0	0	0	0	0	0	0	0	0	0	0	0	0	0	0	0	0	1	0	1	33.3333	0.303706	0
1320	1	0	63	1	0	0	0	0	0	0	0	1	0	1	0	0	0	0	1	0	0	1	1	1	100.528	0.776336	1
1321	0	1	22	0	0	0	0	0	0	0	0	0	0	0	0	0	0	0	0	0	0	0	0	1	13.3333	0.190453	0
1322	0	1	34	0	0	0	0	0	0	0	0	0	0	0	0	0	0	0	0	0	0	0	0	1	26.6667	0.262019	0
1323	0	1	34	0	0	0	0	0	0	0	0	0	0	0	0	0	0	0	0	0	0	0	0	1	26.6667	0.262019	0
1324	0	1	25	0	0	0	0	0	0	0	0	0	0	0	0	0	0	0	0	0	0	0	0	1	16.6667	0.206824	0
1325	0	1	29	0	0	0	0	0	0	0	0	0	0	0	0	0	0	0	0	0	0	0	0	1	21.1111	0.230234	0
1326	0	1	33	0	0	0	0	0	0	0	0	0	0	0	0	0	0	0	0	0	0	0	0	1	25.5556	0.255442	0
1327	1	1	64	0	0	0	0	0	0	0	0	0	0	0	1	0	0	0	0	0	0	1	0	1	70.5823	0.579345	1
1328	1	0	45	1	0	0	1	0	0	0	0	0	0	0	0	0	0	0	1	0	0	1	1	1	56.9113	0.474545	1
1329	0	0	68	0	0	0	0	0	0	0	0	0	0	0	0	0	0	0	0	0	0	1	0	1	71.8846	0.58911	1
1330	0	0	54	0	0	0	0	0	0	0	0	0	0	0	0	0	0	0	0	0	0	1	0	1	56.3291	0.470065	1
1331	0	1	26	0	0	0	0	0	0	0	0	0	0	0	0	0	0	0	0	1	0	0	0	1	17.7778	0.212507	0
1332	0	1	21	0	0	0	0	0	0	0	0	1	0	0	0	0	0	0	1	0	0	0	0	1	26.3451	0.260104	0
1333	0	1	24	0	0	0	0	0	0	0	0	0	0	0	0	0	0	0	0	0	0	0	0	1	15.5556	0.201254	0
1334	1	1	68	0	0	0	0	0	0	0	0	0	0	0	0	0	0	0	0	0	0	0	0	1	75.0267	0.612367	1
1335	1	1	38	0	0	0	0	0	0	0	0	0	0	0	0	0	0	0	0	0	0	0	0	1	41.6934	0.360855	0
1336	0	0	29	0	0	1	1	0	0	0	0	0	0	0	1	0	0	0	0	0	0	0	0	1	28.5513	0.273423	0
1337	0	1	22	0	0	0	0	0	0	0	0	0	0	0	0	0	0	0	0	0	0	0	0	1	13.3333	0.190453	0
1338	0	1	49	0	0	0	0	0	0	0	0	0	0	0	0	0	0	0	0	0	0	1	0	1	43.3333	0.37261	0
1339	0	0	41	0	0	0	0	0	0	0	0	0	0	1	0	0	0	0	0	0	0	0	0	1	51.3782	0.432243	1
1340	0	1	48	0	0	0	0	0	0	0	0	0	0	0	0	0	0	0	0	0	0	0	0	1	42.2222	0.364628	0
1341	0	1	30	0	0	0	0	0	0	0	1	0	0	0	0	0	0	0	0	0	0	0	0	1	22.2222	0.236369	0
1342	0	1	23	0	0	0	0	0	0	0	0	0	1	0	1	0	0	0	0	0	0	0	0	1	14.4444	0.195797	0
1343	1	1	54	1	1	0	1	0	1	0	0	1	0	0	0	0	0	0	0	0	0	0	0	1	73.594	0.601819	1
1344	1	1	64	0	0	0	0	0	0	0	0	0	0	0	0	0	0	0	0	0	0	0	0	1	70.5823	0.579345	1
1345	1	0	22	0	0	0	0	0	0	0	0	0	0	0	0	0	0	0	0	0	0	1	0	1	31.3558	0.290954	0
1346	1	1	69	0	0	0	0	0	0	0	0	0	1	1	0	0	0	0	0	0	0	1	0	1	85.6313	0.686675	1
1347	1	0	62	1	0	0	0	0	0	0	0	0	0	1	0	1	0	0	0	0	0	1	1	1	85.2938	0.684428	1
1348	0	1	20	1	0	0	0	0	0	0	0	0	0	0	0	0	0	0	0	0	0	0	0	1	11.1111	0.1801	0
1349	1	1	78	0	0	1	0	0	0	0	0	0	0	0	0	0	0	0	0	0	1	1	0	1	86.1378	0.690028	1
1350	0	0	22	0	0	1	0	0	0	0	0	1	0	0	0	0	0	0	0	0	0	0	0	1	34.8964	0.314004	0
1351	0	1	59	0	0	0	0	0	0	0	0	1	0	0	0	0	0	0	0	0	0	1	0	1	68.5673	0.564117	1
1352	0	1	25	0	0	0	0	0	0	0	0	0	0	0	0	0	0	0	0	0	0	0	0	1	16.6667	0.206824	0
1353	1	1	55	0	0	0	0	0	0	0	0	0	0	0	0	0	0	0	0	0	0	1	0	1	60.5823	0.502851	1
1354	1	1	68	0	0	1	0	0	0	0	0	0	0	1	0	0	0	0	0	0	0	0	0	1	84.5202	0.679249	1
1355	1	0	59	0	0	1	0	0	0	0	0	0	0	0	0	0	0	0	0	0	0	0	0	1	72.4669	0.593453	1
1356	1	1	32	0	0	1	0	0	0	0	0	0	0	0	0	0	0	0	0	0	0	0	0	1	35.0267	0.314871	0
1357	0	1	27	1	1	0	1	0	0	0	0	0	0	0	0	0	0	0	0	0	0	0	0	1	18.8889	0.218303	0
1358	0	1	23	0	0	0	1	0	0	0	0	0	0	0	0	0	0	0	0	0	0	0	0	1	14.4444	0.195797	0
1359	0	1	29	1	0	0	0	0	0	0	1	0	0	0	0	0	0	0	0	0	0	0	0	1	21.1111	0.230234	0
1360	0	1	35	0	0	0	0	0	0	0	0	0	0	0	0	0	0	0	0	0	0	0	0	1	27.7778	0.268705	0
1361	0	1	39	0	0	0	0	0	0	0	0	0	0	0	0	0	0	0	0	0	0	0	0	1	32.2222	0.296502	0
1362	1	1	39	0	0	0	0	0	0	0	0	0	0	0	0	0	0	0	0	0	0	1	0	1	42.8045	0.368802	0
1363	1	1	54	0	0	0	1	0	0	0	0	0	0	1	0	0	0	0	0	0	0	1	0	1	68.9647	0.56713	1
1364	0	1	25	1	1	0	1	0	0	0	1	0	0	0	0	0	0	0	0	0	0	0	0	1	16.6667	0.206824	0
1365	0	1	54	0	0	0	1	1	1	0	0	0	0	0	0	0	0	0	0	0	0	1	0	1	87.2792	0.697513	1
1366	1	1	68	0	0	0	0	0	0	0	0	0	0	0	0	0	0	0	0	0	0	0	0	1	75.0267	0.612367	1
1367	0	1	40	0	0	0	0	0	0	0	0	0	0	0	0	0	0	0	0	0	0	0	0	1	33.3333	0.303706	0
1368	0	0	37	0	0	0	0	0	0	0	0	0	0	0	0	0	0	0	0	0	0	0	0	1	37.4402	0.33116	0
1369	0	1	29	0	0	0	0	0	1	0	1	0	0	0	0	0	0	0	0	0	0	0	0	1	21.1111	0.230234	0
1370	0	0	44	1	1	0	1	0	0	0	0	1	0	1	0	0	0	0	0	0	0	1	0	1	68.8344	0.566143	1
1371	1	1	61	0	0	0	0	0	0	0	0	1	0	0	0	0	0	0	0	0	0	1	1	1	81.3718	0.657716	1
1372	0	1	23	0	1	0	0	0	0	0	1	0	0	0	0	0	0	0	0	0	0	0	0	1	14.4444	0.195797	0
1373	0	1	34	0	0	1	0	0	0	0	0	0	0	0	0	0	0	0	0	0	0	0	0	1	26.6667	0.262019	0
1374	0	1	29	0	0	0	0	0	0	0	0	0	0	0	0	0	0	0	0	0	0	0	0	1	21.1111	0.230234	0
1375	0	1	44	0	0	0	0	0	0	0	0	0	0	0	0	0	0	0	0	0	0	1	0	1	37.7778	0.333472	0
1376	0	1	36	0	0	1	0	0	0	0	0	0	0	0	0	0	0	0	0	0	0	0	0	1	28.8889	0.275498	0
1377	1	0	45	0	0	0	0	0	0	0	0	0	1	0	0	0	0	0	0	0	0	0	0	1	56.9113	0.474545	1
1378	1	1	52	0	0	0	0	0	0	0	0	0	1	0	0	0	0	0	0	0	0	1	0	1	57.2489	0.477144	1
1379	0	1	52	1	1	0	1	0	0	0	0	0	0	0	0	0	0	0	1	0	0	1	1	1	46.6667	0.396962	1
1380	1	1	28	0	0	1	0	0	0	0	0	1	0	1	0	0	0	0	0	0	0	0	0	1	54.1986	0.453722	1
1381	0	1	54	0	0	0	0	0	0	0	0	0	0	1	0	0	0	0	0	1	0	1	1	1	58.3824	0.485879	1
1382	0	1	32	0	1	0	0	0	0	0	0	0	0	0	0	0	0	0	0	0	0	0	0	1	24.4444	0.248973	0
1383	0	1	48	0	0	0	0	0	0	0	0	0	0	1	0	0	0	0	0	0	0	0	0	1	51.7158	0.434802	1
1384	1	1	52	0	0	0	0	0	0	0	0	0	0	0	0	0	0	0	0	0	0	0	0	1	57.2489	0.477144	1
1385	0	1	30	0	0	0	0	0	0	0	0	0	0	0	0	0	0	0	0	0	0	0	0	1	22.2222	0.236369	0
1386	0	1	19	0	0	0	0	0	0	0	1	0	0	0	0	0	1	0	0	0	0	0	0	1	10	0.175091	0
1387	0	1	20	0	0	0	0	0	0	0	1	0	0	0	0	0	0	0	0	0	0	0	0	1	11.1111	0.1801	0
1388	1	0	41	0	0	0	0	0	0	0	0	0	0	0	0	0	0	0	1	0	0	0	0	1	52.4669	0.440508	1
1389	1	1	77	0	0	0	0	0	0	0	0	0	1	1	0	0	0	0	0	0	0	1	1	1	94.5202	0.742499	1
1390	1	0	61	0	0	0	0	0	0	0	0	1	0	0	0	0	0	0	0	0	0	1	1	1	88.812	0.707402	1
1391	1	0	52	0	0	1	0	0	0	0	0	0	0	0	0	0	0	0	0	0	0	1	0	1	64.6891	0.534489	1
1392	0	1	48	0	0	1	0	0	0	0	0	0	0	0	0	0	0	0	0	0	0	0	0	1	42.2222	0.364628	0
1393	0	1	32	1	0	0	0	0	0	0	0	0	0	0	0	0	0	0	0	0	0	0	0	1	24.4444	0.248973	0
1394	1	0	24	0	0	1	0	0	0	0	0	0	0	0	0	0	0	0	0	0	0	0	0	1	33.578	0.305305	0
1395	1	1	26	0	0	1	0	0	0	0	0	0	0	0	0	0	0	0	0	0	0	1	0	1	28.36	0.272252	0
1396	0	0	47	0	0	0	0	0	0	0	0	0	0	0	0	0	0	0	0	0	0	0	0	1	48.5513	0.410968	1
1397	1	1	67	0	0	0	0	0	0	0	0	0	1	0	1	0	0	0	0	0	0	1	0	1	73.9156	0.604195	1
1398	1	0	70	0	0	0	0	0	0	0	0	0	0	1	0	0	0	0	0	0	0	0	0	1	94.1827	0.740502	1
1399	1	1	31	0	0	1	1	0	0	0	0	0	0	0	0	0	0	0	0	0	0	1	0	1	33.9156	0.30752	0
1400	1	1	30	1	0	0	0	0	0	0	0	0	0	0	0	0	0	0	0	0	0	0	0	1	32.8045	0.300265	0
1401	0	1	47	1	1	0	1	0	0	0	0	0	0	1	0	0	0	0	0	0	0	1	0	1	50.6046	0.426393	1
1402	0	1	38	0	0	0	0	0	0	0	0	0	0	0	0	0	0	0	0	0	0	0	0	1	31.1111	0.289398	0
1403	1	0	60	0	0	1	0	0	0	0	0	0	0	0	0	0	0	0	0	0	0	0	0	1	73.578	0.601701	1
1404	0	1	26	1	0	0	0	0	0	0	0	0	0	0	0	0	0	0	0	0	0	0	0	1	17.7778	0.212507	0
1405	1	1	69	1	0	0	0	0	0	0	0	0	0	0	0	0	0	0	0	0	0	0	0	1	76.1378	0.620477	1
1406	1	1	20	1	1	0	0	0	0	0	1	0	0	0	0	0	0	0	0	0	0	0	0	1	21.6934	0.233435	0
1407	1	1	74	0	0	0	0	0	0	0	0	1	0	0	0	0	0	0	0	0	0	0	0	1	95.8162	0.750073	1
1408	0	1	25	0	0	0	0	0	0	0	0	0	0	0	0	0	0	0	0	0	0	0	0	1	16.6667	0.206824	0
1409	1	1	56	0	0	0	0	0	1	0	0	0	0	0	1	0	0	0	0	0	0	1	1	1	61.6934	0.511424	1
1410	1	1	19	1	1	0	1	0	0	0	0	0	0	0	0	0	0	0	0	0	0	0	0	1	20.5823	0.227354	0
1411	0	1	28	1	0	0	0	0	0	0	0	0	0	0	0	0	0	0	0	0	0	0	0	1	20	0.224212	0
1412	1	1	42	0	0	0	0	0	0	0	0	0	0	0	0	0	0	0	0	0	0	0	0	1	46.1378	0.39306	1
1413	0	1	29	1	0	0	0	0	0	0	1	0	0	0	0	0	0	0	0	0	0	1	0	1	21.1111	0.230234	0
1414	0	1	45	0	0	0	0	0	0	0	0	0	0	0	0	0	0	0	0	0	0	1	0	1	38.8889	0.341138	0
1415	0	1	23	1	1	0	1	0	0	0	0	0	0	0	0	0	0	0	0	0	0	1	0	1	14.4444	0.195797	0
1416	0	1	39	0	0	0	0	0	0	0	0	0	0	0	0	0	0	0	0	0	0	0	0	1	32.2222	0.296502	0
1417	1	1	61	0	0	0	0	0	0	1	0	0	0	0	0	0	0	0	0	0	0	1	1	1	129.888	0.895738	1
1418	0	1	31	0	0	0	0	0	0	0	0	0	1	0	0	0	0	0	0	0	0	0	0	1	23.3333	0.242615	0
1419	1	0	33	0	0	0	0	0	0	0	0	0	0	0	0	0	0	0	0	0	0	0	0	1	43.578	0.374378	0
1420	1	0	46	0	0	1	0	0	0	0	0	0	0	0	0	0	0	0	0	0	0	1	0	1	58.0225	0.483104	1
1421	0	1	30	1	0	0	0	0	0	0	0	0	0	0	0	0	0	0	0	0	0	0	0	1	22.2222	0.236369	0
1422	1	1	40	0	0	0	0	0	0	0	0	0	0	0	0	0	0	0	0	0	0	0	0	1	43.9156	0.376822	0
1423	1	1	37	0	0	1	0	0	0	0	0	0	0	0	0	0	0	0	0	0	0	1	0	1	40.5823	0.352983	0
1424	0	1	26	0	0	0	0	0	0	0	0	0	0	0	0	0	0	0	0	0	0	0	0	1	17.7778	0.212507	0
1425	1	0	28	0	0	1	0	0	0	0	0	0	0	1	0	0	0	0	0	0	0	0	0	1	47.516	0.403254	1
1426	0	1	33	0	0	1	0	0	0	0	0	0	0	0	0	0	0	0	0	0	0	0	0	1	25.5556	0.255442	0
1427	0	1	31	0	0	0	0	0	0	0	0	0	0	0	0	0	0	0	0	0	0	0	0	1	23.3333	0.242615	0
1428	1	1	75	0	0	1	0	0	0	0	0	0	0	0	0	0	0	0	0	0	0	1	0	1	82.8045	0.667602	1
1429	0	1	45	0	0	0	0	0	0	0	0	0	0	0	0	0	0	0	0	0	0	0	0	1	38.8889	0.341138	0
1430	1	1	41	0	0	0	0	0	0	0	1	0	0	0	0	0	0	0	0	0	0	0	0	1	45.0267	0.384909	1
1431	0	1	44	0	0	0	0	0	0	0	0	0	0	0	0	0	0	0	0	0	0	0	0	1	37.7778	0.333472	0
1432	0	0	22	0	0	0	0	0	0	0	0	1	0	0	0	0	0	0	0	0	0	0	0	1	34.8964	0.314004	0
1433	0	1	35	0	0	1	0	0	0	0	0	0	0	0	1	0	0	0	0	0	0	1	0	1	27.7778	0.268705	0
1434	1	0	43	0	0	1	0	0	0	0	0	0	0	0	0	0	0	0	0	0	0	0	0	1	54.6891	0.457477	1
1435	0	1	26	0	0	0	0	0	0	0	0	0	0	1	0	0	0	0	0	0	0	0	0	1	27.2713	0.265644	0
1436	0	1	24	0	0	0	0	0	0	0	0	0	1	0	0	0	0	0	0	0	0	1	1	1	15.5556	0.201254	0
1437	0	1	20	0	0	0	0	0	0	0	0	0	0	0	0	0	0	0	0	0	0	0	0	1	11.1111	0.1801	0
1438	0	1	28	0	0	0	0	0	0	0	0	0	0	0	0	0	0	0	0	0	0	0	0	1	20	0.224212	0
1439	1	1	79	0	0	0	0	0	0	0	0	0	0	1	0	0	0	0	0	0	1	1	0	1	96.7425	0.755395	1
1440	0	1	40	0	0	0	0	0	0	0	0	0	0	0	0	0	0	0	0	0	0	0	0	1	33.3333	0.303706	0
1441	0	1	48	0	0	0	0	0	0	0	0	0	0	0	0	0	0	0	0	0	0	1	1	1	42.2222	0.364628	0
1442	0	1	27	0	0	0	0	0	0	0	0	0	0	0	0	0	0	0	0	0	0	0	0	1	18.8889	0.218303	0
1443	0	1	35	0	0	0	0	0	0	0	0	0	0	0	0	0	0	0	0	0	0	0	0	1	27.7778	0.268705	0
1444	0	1	46	0	0	1	0	0	0	0	0	0	0	1	0	0	0	0	0	0	0	0	0	1	49.4935	0.418026	1
1445	1	0	66	0	0	0	0	0	0	0	1	0	0	0	0	0	0	0	0	0	0	1	0	1	80.2447	0.649842	1
1446	1	0	47	1	1	0	1	0	0	0	0	0	0	1	0	0	0	0	0	0	0	1	1	1	68.6271	0.56457	1
1447	0	1	26	1	0	0	0	0	0	0	0	0	0	0	0	0	0	0	0	0	0	0	0	1	17.7778	0.212507	0
1448	0	1	24	0	0	0	0	0	0	0	0	0	0	0	0	0	0	0	0	0	0	0	0	1	15.5556	0.201254	0
1449	1	0	72	1	0	0	0	0	0	0	0	0	0	0	0	0	0	0	0	0	0	1	0	1	86.9113	0.695112	1
1450	1	1	20	1	1	0	1	0	0	0	0	0	1	0	0	0	0	0	0	0	0	0	0	1	21.6934	0.233435	0
1451	0	1	21	0	0	0	0	0	0	0	0	0	0	0	0	0	0	0	0	0	0	0	0	1	12.2222	0.185221	0
1452	0	1	64	0	0	0	0	0	0	0	0	0	0	1	0	0	0	0	0	0	0	0	0	1	69.4935	0.571133	1
1453	0	1	30	0	0	0	0	0	0	0	0	0	0	0	0	0	0	0	0	0	0	1	1	1	22.2222	0.236369	0
1454	1	1	68	0	0	0	0	0	0	0	0	0	0	0	0	0	0	0	0	0	0	1	0	1	75.0267	0.612367	1
1455	0	0	26	1	1	0	1	0	0	0	0	1	0	0	0	0	0	0	0	0	0	0	0	1	39.3408	0.344281	0
1456	1	1	39	0	0	0	0	0	0	0	0	0	0	0	0	0	0	0	0	0	0	0	0	1	42.8045	0.368802	0
1457	0	1	33	0	0	0	0	0	0	0	0	0	0	0	0	0	0	0	0	0	0	1	0	1	25.5556	0.255442	0
1458	1	1	51	0	0	0	0	0	0	0	0	0	0	0	0	0	0	0	0	0	0	1	0	1	56.1378	0.468595	1
1459	1	0	65	0	0	0	0	0	0	0	0	0	0	0	0	0	0	0	0	0	0	0	0	1	79.1336	0.641998	1
1460	0	1	36	0	0	0	0	0	0	0	0	0	0	0	0	0	0	0	0	0	0	0	0	1	28.8889	0.275498	0
1461	1	0	46	0	0	1	0	0	0	0	0	1	0	0	0	0	0	0	0	0	0	1	0	1	72.1453	0.591056	1
1462	1	0	77	0	0	0	0	0	0	0	0	0	0	1	0	1	0	0	0	0	0	1	0	1	101.96	0.783921	1
1463	0	1	28	0	0	0	0	0	0	0	0	0	0	0	0	0	0	0	0	0	0	0	0	1	20	0.224212	0
1464	0	1	47	1	0	0	0	0	0	0	0	0	0	0	0	0	0	0	0	0	0	1	0	1	41.1111	0.35672	0
1465	0	1	34	0	0	0	0	0	0	0	0	0	0	0	0	0	0	0	0	0	0	0	0	1	26.6667	0.262019	0
1466	0	1	31	0	0	0	0	0	0	0	0	0	0	0	0	0	0	0	0	0	0	0	0	1	23.3333	0.242615	0
1467	1	1	26	1	0	0	0	0	0	0	0	0	0	1	0	0	0	0	0	0	0	0	0	1	37.8536	0.333992	0
1468	1	1	52	0	0	0	0	0	0	0	0	0	0	0	0	0	0	0	0	0	0	1	1	1	57.2489	0.477144	1
1469	1	1	57	0	0	0	0	0	0	0	0	1	0	0	0	0	0	0	0	0	0	0	0	1	76.9273	0.626199	1
1470	1	0	53	0	0	0	0	0	0	0	0	0	0	0	0	0	0	0	0	0	0	0	0	1	65.8002	0.543012	1
1471	0	1	21	0	0	1	0	0	0	0	0	0	1	0	0	0	0	0	0	0	0	0	0	1	12.2222	0.185221	0
1472	0	0	45	0	0	0	0	0	0	0	0	0	0	1	0	0	0	0	0	0	0	1	0	1	55.8226	0.466173	1
1473	0	1	34	0	0	0	0	0	0	0	1	0	0	0	0	0	0	0	0	0	0	0	0	1	26.6667	0.262019	0
1474	0	1	29	0	0	0	0	0	0	0	0	0	0	0	0	0	0	0	0	0	0	0	0	1	21.1111	0.230234	0
1475	1	1	63	0	0	0	0	0	0	0	0	0	0	0	0	0	0	0	0	0	0	1	0	1	69.4711	0.570964	1
1476	0	0	28	0	0	0	0	0	0	0	0	0	0	0	0	0	0	0	0	0	0	0	0	1	27.4402	0.266662	0
1477	1	1	55	0	0	0	0	0	0	0	0	0	0	0	0	0	0	0	0	0	0	0	0	1	60.5823	0.502851	1
1478	0	1	40	0	0	0	0	0	0	0	0	0	0	0	0	0	0	0	0	0	0	0	0	1	33.3333	0.303706	0
1479	0	1	27	0	0	0	0	0	0	0	1	0	0	0	1	0	0	0	0	0	0	0	0	1	18.8889	0.218303	0
1480	0	1	41	0	0	0	0	0	0	0	0	0	0	0	0	0	0	0	0	0	0	0	0	1	34.4444	0.311007	0
1481	0	1	44	0	0	0	0	0	0	0	0	0	0	0	0	0	0	0	0	0	0	0	0	1	37.7778	0.333472	0
1482	0	1	34	1	1	0	1	0	0	0	0	0	0	0	0	0	0	0	0	0	0	0	0	1	26.6667	0.262019	0
1483	1	0	64	0	0	0	0	0	0	1	0	0	0	1	0	0	0	0	0	0	0	1	1	1	150.155	0.941384	1
1484	0	1	44	0	0	0	0	0	0	0	0	0	0	0	0	0	0	0	0	0	0	0	0	1	37.7778	0.333472	0
1485	0	1	26	1	0	0	0	0	1	0	0	0	0	0	0	0	0	0	0	0	0	1	0	1	17.7778	0.212507	0
1486	1	0	54	0	0	0	0	0	0	0	0	0	0	0	0	0	0	0	0	0	0	1	1	1	66.9113	0.551509	1
1487	0	1	24	0	0	0	0	0	0	0	0	0	0	0	0	0	0	0	1	0	0	0	0	1	15.5556	0.201254	0
1488	0	1	35	0	0	0	0	0	0	0	0	0	0	0	0	0	0	0	0	0	0	0	0	1	27.7778	0.268705	0
1489	1	1	38	0	0	0	0	0	0	0	0	0	0	0	0	0	0	1	0	0	0	1	0	1	41.6934	0.360855	0
1490	0	1	26	0	0	0	0	0	0	0	0	0	0	0	0	0	0	0	0	0	0	0	0	1	17.7778	0.212507	0
1491	0	1	45	0	0	0	0	0	0	0	0	0	0	0	0	0	0	0	0	0	0	1	0	1	38.8889	0.341138	0
1492	0	1	20	0	0	0	0	0	0	0	0	0	0	0	0	0	0	0	0	0	0	0	0	1	11.1111	0.1801	0
1493	0	0	22	1	0	0	0	0	0	0	0	0	1	0	0	0	0	0	0	0	0	1	0	1	20.7735	0.228393	0
1494	0	1	53	0	0	0	0	0	0	0	0	0	0	0	0	0	0	0	0	0	0	0	0	1	47.7778	0.4052	1
1495	0	0	52	0	0	0	0	0	0	0	0	0	0	1	0	0	0	0	0	0	0	0	0	1	63.6004	0.526118	1
1496	0	1	37	0	0	1	1	0	0	0	0	0	0	1	0	0	0	0	0	0	0	0	0	1	39.4935	0.345346	0
1497	1	1	20	1	1	0	1	0	1	0	0	0	0	0	0	0	0	0	0	0	0	0	0	1	21.6934	0.233435	0
1498	0	1	35	1	1	0	1	0	0	0	0	0	0	0	0	0	0	0	0	0	0	1	0	1	27.7778	0.268705	0
1499	0	1	46	0	0	0	0	0	0	0	0	0	0	0	0	0	0	0	0	0	0	0	0	1	40	0.348889	0
1500	1	1	77	0	0	0	0	0	0	0	0	0	0	0	0	0	0	0	0	0	0	0	0	1	85.0267	0.682645	1
1501	0	1	32	0	0	1	0	0	0	0	0	0	0	0	0	0	0	0	0	0	0	1	0	1	24.4444	0.248973	0
1502	0	1	54	0	0	1	0	0	1	0	0	0	0	0	0	0	0	0	0	0	0	0	0	1	48.8889	0.413493	1
1503	0	1	33	0	0	0	0	0	0	0	0	0	0	0	0	0	0	0	0	0	0	1	0	1	25.5556	0.255442	0
1504	0	1	19	0	0	0	0	0	0	0	0	0	0	0	0	0	0	0	0	0	0	0	0	1	10	0.175091	0
1505	0	0	46	0	0	0	0	0	0	0	0	0	0	1	0	0	0	0	0	0	0	1	0	1	56.9337	0.474717	1
1506	0	1	39	0	0	0	0	0	0	0	0	0	0	0	0	0	0	0	0	0	0	0	0	1	32.2222	0.296502	0
1507	0	1	41	0	0	0	0	0	0	0	0	0	0	0	0	0	0	0	0	0	0	0	0	1	34.4444	0.311007	0
1508	0	1	40	0	0	0	0	0	0	0	0	0	0	0	0	0	0	0	0	0	0	0	0	1	33.3333	0.303706	0
1509	0	1	54	0	0	0	0	0	0	0	0	0	0	0	0	0	0	0	0	0	0	0	0	1	48.8889	0.413493	1
1510	0	1	48	0	0	0	0	0	0	0	0	0	0	0	0	0	0	0	0	0	0	0	0	1	42.2222	0.364628	0
1511	0	1	32	0	0	0	0	0	0	0	1	0	0	1	0	0	0	0	0	0	0	0	0	1	33.938	0.307667	0
1512	0	0	47	0	0	0	0	0	0	0	0	0	1	1	0	0	0	0	0	0	0	0	0	1	58.0448	0.483276	1
1513	1	0	50	0	0	1	0	0	0	0	0	0	0	0	0	0	0	0	0	0	0	1	0	1	62.4669	0.517388	1
1514	0	1	55	0	0	0	0	0	0	0	0	0	0	0	0	0	0	0	0	0	0	0	0	1	50	0.421834	1
1515	0	1	20	0	0	0	0	0	0	0	0	0	0	0	0	0	0	0	0	0	0	0	0	1	11.1111	0.1801	0
1516	1	1	80	0	0	0	0	0	0	0	0	0	0	0	0	0	0	0	0	0	0	0	0	1	88.36	0.704506	1
1517	1	1	76	0	0	1	0	0	0	0	0	1	0	0	0	0	0	0	0	0	0	1	0	1	98.0384	0.762711	1
1518	0	1	24	0	1	0	0	0	0	0	0	0	0	0	0	0	0	0	0	0	0	0	0	1	15.5556	0.201254	0
1519	0	1	49	0	0	0	0	0	0	0	0	0	0	0	0	0	0	0	0	0	0	1	0	1	43.3333	0.37261	0
1520	1	0	33	0	1	0	0	0	0	0	0	1	0	0	0	0	0	0	0	0	0	1	1	1	57.7009	0.480625	1
1521	1	1	73	0	1	0	0	0	0	0	1	0	0	0	0	0	0	0	0	0	0	1	0	1	80.5823	0.652209	1
1522	0	1	51	0	0	0	0	0	0	0	0	0	0	0	0	0	0	0	0	0	0	1	0	1	45.5555	0.388781	1
1523	0	1	41	0	0	0	0	0	0	0	0	0	0	0	0	0	0	0	0	0	0	0	0	1	34.4444	0.311007	0
1524	0	1	55	0	0	0	0	0	0	0	0	0	0	0	0	0	0	0	0	0	0	0	0	1	50	0.421834	1
1525	0	1	27	0	0	0	0	0	0	0	0	0	0	0	1	0	0	0	0	0	0	1	0	1	18.8889	0.218303	0
1526	1	0	68	0	0	0	0	1	1	0	0	1	0	0	0	0	0	0	0	0	0	1	0	1	134.98	0.90953	1
1527	1	0	23	0	0	0	0	0	0	0	0	1	0	0	0	0	0	0	0	0	0	1	1	1	46.5898	0.396393	1
1528	0	1	28	0	0	1	0	0	0	0	0	0	0	0	0	0	0	0	0	0	0	0	0	1	20	0.224212	0
1529	0	1	22	0	0	0	0	0	0	0	1	0	0	0	0	0	0	0	0	0	0	0	0	1	13.3333	0.190453	0
1530	1	1	42	0	0	0	0	0	0	0	0	0	1	1	0	0	0	0	0	0	0	1	1	1	55.6313	0.464704	1
1531	0	1	45	0	0	0	0	0	0	0	0	0	0	0	0	0	0	0	0	0	0	0	0	1	38.8889	0.341138	0
1532	0	1	33	0	0	0	0	0	0	0	0	0	0	0	0	0	0	0	0	0	0	0	0	1	25.5556	0.255442	0
1533	0	1	36	1	0	0	0	0	0	0	0	0	0	0	0	0	0	0	0	0	0	0	0	1	28.8889	0.275498	0
1534	0	1	26	0	0	0	0	0	0	0	0	0	1	0	0	0	0	0	0	0	0	0	0	1	17.7778	0.212507	0
1535	0	0	36	0	0	0	0	0	0	0	0	0	0	0	0	0	0	0	0	0	0	0	0	1	36.3291	0.323608	0
1536	1	1	37	0	0	1	0	0	0	0	0	0	0	0	0	0	0	0	0	0	0	0	0	1	40.5823	0.352983	0
1537	0	1	37	0	0	0	0	0	0	0	0	0	0	0	0	0	0	0	0	0	0	0	0	1	30	0.282396	0
1538	1	0	69	0	0	0	1	0	0	0	0	0	0	1	0	0	0	0	0	0	0	0	0	1	93.0715	0.733857	1
1539	0	0	21	0	0	0	0	0	0	0	0	0	0	0	0	0	0	0	0	0	0	0	0	1	19.6624	0.222405	0
1540	1	0	42	0	0	1	0	0	0	0	0	0	0	0	1	0	0	0	0	0	0	1	0	1	53.578	0.448978	1
1541	1	1	76	0	0	0	0	0	0	0	0	0	0	0	0	0	0	0	0	0	0	0	0	1	83.9156	0.675169	1
1542	1	1	68	1	1	0	1	0	0	0	0	0	0	1	0	0	0	0	0	0	0	0	0	1	84.5202	0.679249	1
1543	1	1	50	0	0	0	0	0	0	0	0	0	0	0	0	0	0	0	0	0	0	0	0	1	55.0267	0.460064	1
1544	0	1	27	0	0	0	0	0	0	0	0	0	0	0	0	0	0	0	0	0	0	0	0	1	18.8889	0.218303	0
1545	0	1	45	0	0	0	0	0	0	0	0	0	0	0	0	0	0	0	0	0	0	0	0	1	38.8889	0.341138	0
1546	0	1	41	0	1	0	0	0	0	0	0	0	0	0	0	0	0	0	0	0	0	0	0	1	34.4444	0.311007	0
1547	0	1	32	0	0	0	0	0	0	0	0	0	0	0	0	0	0	0	0	0	0	0	0	1	24.4444	0.248973	0
1548	0	0	24	1	0	0	0	0	0	0	1	0	0	1	0	0	0	0	0	0	0	1	0	1	32.4893	0.298224	0
1549	1	1	71	0	0	0	0	0	0	0	0	1	0	0	0	0	0	0	1	0	0	1	0	1	92.4829	0.730293	1
1550	0	1	51	0	0	0	0	0	0	0	0	0	0	0	0	0	0	0	0	0	0	1	1	1	45.5555	0.388781	1
1551	0	1	48	0	0	1	0	0	0	0	0	0	0	0	1	0	0	0	0	0	0	0	0	1	42.2222	0.364628	0
1552	1	0	73	0	0	0	0	0	0	0	0	0	0	1	0	1	0	0	0	0	0	1	0	1	97.516	0.75978	1
1553	0	1	37	0	0	0	0	0	0	0	0	0	0	0	0	0	0	0	0	0	0	0	0	1	30	0.282396	0
1554	0	1	48	0	0	0	0	0	0	0	0	0	0	0	0	0	0	0	0	0	0	0	0	1	42.2222	0.364628	0
1555	1	0	79	0	0	1	1	0	1	0	0	0	0	0	0	0	0	0	0	0	0	1	0	1	94.6891	0.743495	1
1556	0	1	36	0	0	0	0	0	0	0	0	0	0	0	0	0	0	0	0	0	0	0	0	1	28.8889	0.275498	0
1557	0	1	47	0	0	0	0	0	0	0	0	0	0	0	0	0	0	0	0	0	0	0	0	1	41.1111	0.35672	0
1558	1	0	53	0	0	0	0	0	0	0	0	0	0	0	0	0	0	0	0	0	0	0	0	1	65.8002	0.543012	1
1559	1	1	67	0	0	1	0	0	0	0	0	0	0	0	0	0	0	0	0	0	0	1	0	1	73.9156	0.604195	1
1560	0	1	33	0	0	0	0	0	0	0	0	0	0	1	0	0	0	0	0	0	0	1	0	1	35.0491	0.31502	0
1561	0	1	35	0	0	0	0	0	0	0	0	0	0	0	0	0	0	0	0	0	0	0	0	1	27.7778	0.268705	0
1562	0	1	50	0	0	0	0	0	0	0	0	0	0	0	0	0	0	0	0	0	0	0	0	1	44.4444	0.380663	0
1563	1	1	41	0	0	1	0	0	0	0	0	0	1	0	0	0	0	0	0	0	0	0	0	1	45.0267	0.384909	1
1564	1	0	48	0	0	0	0	0	0	0	0	0	0	0	0	0	0	0	0	0	0	1	0	1	60.2447	0.500246	1
1565	0	1	23	0	0	0	0	0	0	0	1	0	0	0	0	0	0	0	0	0	0	1	0	1	14.4444	0.195797	0
1566	1	0	43	0	0	0	0	0	0	0	0	0	0	1	0	0	0	0	0	0	0	0	0	1	64.1827	0.530597	1
1567	0	1	33	0	0	0	0	0	0	0	0	0	0	0	0	0	0	0	0	0	0	0	0	1	25.5556	0.255442	0
1568	0	1	40	0	0	0	0	0	0	0	0	0	0	0	0	0	0	0	0	0	0	1	0	1	33.3333	0.303706	0
1569	1	1	35	0	0	0	0	0	0	0	0	0	0	0	0	0	0	0	0	0	0	0	0	1	38.36	0.337479	0
1570	1	0	62	0	1	0	0	1	1	0	0	0	1	0	0	0	0	0	0	0	0	0	0	1	114.191	0.841066	1
1571	1	0	70	0	0	0	0	0	0	0	0	0	0	1	0	0	0	0	0	0	0	1	0	1	94.1827	0.740502	1
1572	1	1	58	0	0	0	0	0	0	0	0	0	0	0	0	0	0	0	0	0	0	0	0	1	63.9156	0.528543	1
1573	0	1	50	1	1	0	1	0	0	0	0	0	0	0	0	0	0	0	0	0	0	0	0	1	44.4444	0.380663	0
1574	0	1	27	1	1	0	1	0	0	0	0	0	0	0	0	0	0	0	0	0	0	0	0	1	18.8889	0.218303	0
1575	0	1	21	1	1	0	1	0	0	0	0	0	0	0	0	0	0	0	0	0	0	0	0	1	12.2222	0.185221	0
1576	1	0	47	1	0	1	0	0	0	0	0	0	0	1	0	0	0	0	0	0	0	0	0	1	68.6271	0.56457	1
1577	1	1	55	0	0	0	0	0	0	0	0	0	0	0	0	0	0	0	0	0	0	0	0	1	60.5823	0.502851	1
1578	1	1	67	0	0	0	0	1	1	0	0	0	0	0	0	0	0	0	0	0	0	1	0	1	112.306	0.833135	1
1579	0	1	22	1	0	0	0	0	0	0	0	0	0	0	0	0	0	0	0	0	0	1	0	1	13.3333	0.190453	0
1580	0	1	29	0	0	1	1	0	0	0	0	0	0	1	0	0	0	0	0	0	0	0	0	1	30.6046	0.286194	0
1581	0	1	28	0	0	0	0	0	0	0	0	0	0	0	0	0	0	0	0	0	0	0	0	1	20	0.224212	0
1582	0	0	36	0	0	0	0	0	0	0	0	0	0	0	0	0	0	0	0	0	0	1	0	1	36.3291	0.323608	0
1583	0	1	26	0	0	1	0	0	0	0	1	0	0	0	0	0	0	0	0	0	0	1	0	1	17.7778	0.212507	0
1584	0	0	28	0	0	0	0	0	0	0	0	0	0	0	0	0	0	0	0	0	0	0	0	1	27.4402	0.266662	0
1585	0	1	22	0	1	0	0	0	0	0	1	0	0	0	0	0	0	0	0	0	0	0	0	1	13.3333	0.190453	0
1586	0	1	46	0	0	0	0	0	0	0	0	0	0	0	0	0	0	0	0	0	0	1	0	1	40	0.348889	0
1587	0	1	26	0	0	0	0	0	0	0	0	0	0	0	0	0	0	0	0	0	0	0	0	1	17.7778	0.212507	0
1588	0	1	21	0	0	0	0	0	0	0	1	0	0	0	0	0	0	0	0	0	0	0	0	1	12.2222	0.185221	0
1589	1	1	74	0	0	0	0	0	0	0	0	0	0	1	0	0	0	0	0	0	0	1	1	1	91.1869	0.722342	1
1590	0	1	20	0	0	0	0	0	0	0	1	0	0	0	0	0	0	0	0	0	0	0	0	1	11.1111	0.1801	0
1591	1	1	66	0	0	0	0	0	0	0	0	0	0	1	0	0	0	0	0	0	0	0	0	1	82.298	0.664124	1
1592	1	1	22	0	0	1	0	0	0	0	0	0	0	0	0	0	0	0	0	0	0	1	0	1	23.9156	0.245933	0
1593	0	1	79	0	0	0	0	1	1	0	0	0	0	1	0	0	0	0	0	0	0	1	1	1	124.551	0.879317	1
1594	1	1	43	0	0	0	1	0	0	0	0	0	0	0	0	0	0	0	0	0	0	0	0	1	47.2489	0.401272	1
1595	0	1	27	0	0	0	0	0	0	0	1	0	0	0	0	0	0	0	0	0	0	1	0	1	18.8889	0.218303	0
1596	1	0	25	0	0	0	0	0	0	0	0	0	0	0	0	0	0	0	0	0	0	0	0	1	34.6891	0.312628	0
1597	1	1	59	0	0	1	0	0	0	0	0	0	0	0	0	0	0	0	0	0	1	0	0	1	65.0267	0.537081	1
1598	1	1	63	0	0	0	0	0	0	0	0	0	1	0	0	0	0	0	0	0	0	0	0	1	69.4711	0.570964	1
1599	1	0	51	0	0	0	0	0	0	0	1	0	0	0	0	0	0	0	0	0	0	0	0	1	63.578	0.525946	1
1600	1	1	48	0	1	0	0	0	0	0	0	1	0	0	0	0	0	0	0	0	0	1	0	1	66.9273	0.551631	1
1601	1	0	76	0	0	1	0	0	0	0	0	0	0	0	1	0	0	0	0	0	0	1	0	1	91.3558	0.723386	1
1602	1	0	44	0	0	0	0	0	0	0	0	0	0	0	0	0	0	0	0	0	0	1	0	1	55.8002	0.466001	1
1603	0	1	45	0	0	0	0	0	0	0	0	0	0	0	0	0	0	0	0	0	0	0	0	1	38.8889	0.341138	0
1604	0	1	48	0	0	0	0	0	0	0	0	0	0	0	0	0	0	0	0	0	0	0	0	1	42.2222	0.364628	0
1605	0	0	37	0	0	0	0	0	0	0	0	0	0	1	0	0	0	0	0	0	0	0	0	1	46.9337	0.398937	1
1606	1	1	45	0	0	0	0	0	0	0	0	0	0	0	0	0	0	0	0	0	0	0	0	1	49.4711	0.417858	1
1607	1	1	67	0	0	0	0	0	0	0	0	0	0	0	0	0	0	0	0	0	0	0	0	1	73.9156	0.604195	1
1608	1	0	38	0	0	0	0	0	0	0	0	0	1	0	0	0	0	0	0	0	0	0	0	1	49.1336	0.415325	1
1609	0	1	35	0	0	0	0	0	0	0	0	0	0	0	0	1	0	0	0	0	0	1	0	1	27.7778	0.268705	0
1610	0	1	21	0	0	0	0	0	0	0	0	0	0	0	0	0	0	0	0	0	0	1	0	1	12.2222	0.185221	0
1611	0	1	25	0	1	0	0	0	0	0	0	0	1	0	0	0	0	0	0	0	0	0	0	1	16.6667	0.206824	0
1612	1	0	65	0	0	1	0	0	0	0	0	0	0	0	0	0	0	0	0	0	0	0	0	1	79.1336	0.641998	1
1613	1	0	83	0	0	0	0	0	1	0	0	0	0	0	0	0	0	0	0	0	0	1	0	1	99.1336	0.768774	1
1614	0	1	35	0	0	0	0	0	0	0	0	0	0	0	0	0	0	0	0	0	0	0	0	1	27.7778	0.268705	0
1615	1	1	67	0	0	1	0	0	0	0	0	0	0	1	1	0	0	0	0	0	0	0	0	1	83.4091	0.671731	1
1616	1	0	16	0	1	0	0	0	0	0	0	1	0	1	0	0	0	0	0	0	0	1	0	1	48.3055	0.409132	1
1617	1	1	73	0	0	0	0	0	0	0	0	0	0	0	0	0	0	0	0	0	0	0	0	1	80.5823	0.652209	1
1618	1	0	57	0	0	0	0	0	0	0	0	0	0	0	0	0	0	0	0	0	0	1	0	1	70.2447	0.576803	1
1619	0	1	46	0	0	0	0	0	0	0	0	0	0	0	0	0	0	0	0	0	0	1	0	1	40	0.348889	0
1620	0	1	25	0	0	0	0	0	0	0	0	0	0	0	0	0	0	0	0	0	0	0	0	1	16.6667	0.206824	0
1621	1	0	73	0	0	0	0	0	0	1	0	0	0	1	0	0	0	1	0	0	0	1	1	1	160.155	0.956271	1
1622	0	1	35	0	0	0	0	0	0	0	0	0	0	0	0	0	0	0	0	0	0	1	0	1	27.7778	0.268705	0
1623	1	0	71	0	0	1	0	0	0	0	0	0	0	0	0	0	0	0	0	0	0	1	0	1	85.8002	0.687795	1
1624	0	1	21	0	0	0	0	0	0	0	0	0	0	0	0	0	0	0	0	0	0	0	0	1	12.2222	0.185221	0
1625	1	0	71	0	0	0	0	0	0	0	0	0	1	0	1	0	0	0	0	0	0	1	0	1	85.8002	0.687795	1
1626	0	1	33	0	0	0	0	0	0	0	0	0	0	0	0	0	0	0	0	0	0	0	0	1	25.5556	0.255442	0
1627	1	0	57	0	0	1	0	0	0	0	1	0	0	1	0	0	0	0	0	0	0	0	0	1	79.7382	0.646276	1
1628	0	1	21	0	0	0	0	0	0	0	1	0	0	0	0	0	0	0	0	0	0	0	0	1	12.2222	0.185221	0
1629	0	1	27	0	0	0	0	0	0	0	0	0	0	0	1	0	0	0	0	0	0	1	0	1	18.8889	0.218303	0
1630	1	0	39	0	0	0	0	0	0	0	0	0	0	0	0	0	0	0	0	0	0	0	0	1	50.2447	0.423677	1
1631	1	0	66	0	0	0	0	0	0	0	0	0	1	0	0	0	0	0	0	0	0	1	0	1	80.2447	0.649842	1
1632	0	1	36	0	0	1	0	0	0	0	0	0	0	0	0	0	0	0	0	0	0	0	0	1	28.8889	0.275498	0
1633	0	1	31	0	0	0	0	0	0	0	0	0	0	1	0	0	0	0	1	0	0	0	0	1	32.8269	0.30041	0
1634	0	1	32	0	0	0	0	0	0	0	0	0	0	0	0	0	0	0	0	0	0	0	0	1	24.4444	0.248973	0
1635	0	1	40	0	0	1	0	0	0	0	0	0	0	0	0	0	0	0	0	0	0	0	0	1	33.3333	0.303706	0
1636	0	1	39	0	0	0	0	0	0	0	0	0	0	0	0	0	0	0	0	0	0	1	0	1	32.2222	0.296502	0
1637	0	1	33	0	0	0	0	0	0	0	0	0	0	0	0	0	0	0	1	0	0	0	0	1	25.5556	0.255442	0
1638	0	1	21	1	1	0	1	0	0	0	0	0	0	0	0	0	0	0	0	0	0	0	0	1	12.2222	0.185221	0
1639	0	1	25	0	0	0	0	0	0	0	0	0	0	0	0	0	0	0	0	0	0	0	0	1	16.6667	0.206824	0
1640	0	1	37	0	0	0	0	0	0	0	0	0	0	0	0	0	0	0	0	0	0	0	0	1	30	0.282396	0
1641	0	1	27	0	0	1	0	1	1	0	0	0	0	0	0	0	0	0	0	0	0	1	0	1	57.2792	0.477377	1
1642	1	0	56	0	0	0	0	0	0	0	0	0	0	0	0	0	0	0	0	0	0	1	1	1	69.1336	0.56841	1
1643	0	1	20	0	0	0	1	0	0	0	1	0	0	0	0	0	0	0	0	0	0	0	0	1	11.1111	0.1801	0
1644	0	0	33	0	0	1	0	0	0	0	0	0	0	0	0	0	0	0	0	0	0	1	0	1	32.9958	0.301507	0
1645	0	0	34	0	0	0	0	0	0	0	0	0	0	1	0	0	0	0	0	0	0	1	0	1	43.6004	0.37454	0
1646	0	1	48	0	0	0	0	0	0	0	0	0	0	0	0	0	0	0	0	0	0	0	0	1	42.2222	0.364628	0
1647	0	1	20	0	0	0	0	0	0	0	0	0	1	0	0	0	0	0	0	0	0	1	0	1	11.1111	0.1801	0
1648	1	1	44	0	0	1	0	0	0	0	0	0	0	1	0	0	0	0	0	0	0	1	0	1	57.8536	0.481802	1
1649	1	0	50	1	0	0	0	0	0	0	0	0	0	1	0	0	0	0	0	0	0	0	0	1	71.9604	0.589676	1
1650	0	1	35	1	0	0	0	0	0	0	0	0	1	0	0	0	0	0	0	0	0	0	0	1	27.7778	0.268705	0
1651	1	1	43	1	1	0	1	0	0	0	0	1	0	1	0	0	0	1	0	0	0	1	1	1	70.8653	0.581473	1
1652	0	1	36	0	0	1	0	0	0	0	0	0	0	0	0	0	0	0	0	0	0	0	0	1	28.8889	0.275498	0
1653	1	0	60	0	0	1	0	0	0	1	0	0	0	1	0	0	0	0	0	0	0	1	0	1	145.711	0.933339	1
1654	0	1	51	0	0	0	0	0	0	0	0	0	0	0	0	0	0	0	0	0	0	0	0	1	45.5555	0.388781	1
1655	0	1	42	0	0	0	0	0	0	0	0	0	0	0	0	0	0	0	0	0	0	1	0	1	35.5556	0.318404	0
1656	1	0	72	0	0	0	0	0	0	0	0	0	0	0	0	0	0	0	0	0	0	0	0	1	86.9113	0.695112	1
1657	1	0	32	0	0	0	0	0	0	0	0	0	0	1	0	0	0	0	0	0	0	0	0	1	51.9604	0.436659	1
1658	0	1	50	1	0	0	0	0	0	0	0	0	0	0	0	0	0	0	0	0	0	0	0	1	44.4444	0.380663	0
1659	1	0	65	0	0	0	0	0	0	0	0	0	0	1	0	0	0	0	0	0	0	1	0	1	88.6271	0.706219	1
1660	0	1	28	0	0	0	1	0	1	0	0	0	1	0	0	0	0	0	0	0	0	1	0	1	20	0.224212	0
1661	0	1	23	0	0	0	0	0	0	0	0	0	0	0	0	0	0	0	0	0	0	0	0	1	14.4444	0.195797	0
1662	0	1	53	0	0	0	0	0	0	0	0	0	0	0	0	0	0	0	0	0	0	0	0	1	47.7778	0.4052	1
1663	0	1	37	0	1	0	0	0	0	0	0	0	0	0	0	0	0	0	0	0	0	1	0	1	30	0.282396	0
1664	0	1	21	0	0	0	0	0	0	0	0	0	0	0	0	0	0	0	0	0	0	0	0	1	12.2222	0.185221	0
1665	1	1	61	0	0	0	0	0	0	0	0	0	0	1	0	0	0	0	0	0	0	1	1	1	76.7425	0.624862	1
1666	1	1	65	0	0	1	0	0	0	0	0	1	0	0	1	0	0	0	0	0	0	0	0	1	85.8162	0.687901	1
1667	1	0	62	0	0	1	0	0	0	0	0	0	0	0	0	0	0	0	0	0	0	1	0	1	75.8002	0.61802	1
1668	0	1	54	0	0	0	0	0	0	0	0	0	0	0	0	0	0	0	0	0	0	1	0	1	48.8889	0.413493	1
1669	0	1	23	1	0	0	0	0	0	0	0	0	0	0	0	0	1	0	0	0	0	0	0	1	14.4444	0.195797	0
1670	0	1	21	1	0	0	0	0	0	0	0	0	0	0	0	0	0	0	0	0	0	1	0	1	12.2222	0.185221	0
1671	1	0	22	0	0	0	0	0	0	0	0	0	1	1	0	0	0	0	0	0	0	1	0	1	40.8493	0.354868	0
1672	0	1	37	1	0	0	0	0	0	0	0	0	1	0	0	0	0	0	0	0	0	0	0	1	30	0.282396	0
1673	0	1	39	0	0	0	0	0	0	0	0	0	0	0	0	0	0	0	0	0	0	0	0	1	32.2222	0.296502	0
1674	0	1	38	0	0	0	0	0	0	0	0	0	0	0	0	0	0	0	0	0	0	1	0	1	31.1111	0.289398	0
1675	1	0	41	0	0	0	0	0	1	0	0	0	1	1	0	0	0	0	0	0	1	0	0	1	61.9604	0.513483	1
1676	0	1	23	0	0	0	0	0	0	0	0	0	0	0	0	0	0	0	0	0	0	0	0	1	14.4444	0.195797	0
1677	0	1	27	0	0	0	0	0	0	0	0	0	0	0	0	0	0	0	0	0	0	0	0	1	18.8889	0.218303	0
1678	1	1	49	0	0	0	0	0	0	0	0	0	0	0	0	0	0	0	0	0	0	0	0	1	53.9156	0.451557	1
1679	0	1	22	1	1	0	1	0	0	0	1	0	0	0	0	0	0	0	0	0	0	1	0	1	13.3333	0.190453	0
1680	0	0	29	0	0	1	0	0	0	0	0	0	0	0	0	0	0	0	0	0	0	0	0	1	28.5513	0.273423	0
1681	1	1	71	0	0	0	0	0	0	0	0	1	0	0	0	0	0	0	0	0	1	1	0	1	92.4829	0.730293	1
1682	0	1	24	0	0	0	0	0	0	0	0	0	0	0	0	0	0	0	0	0	0	0	0	1	15.5556	0.201254	0
1683	0	1	32	0	0	0	0	0	0	0	0	0	1	0	0	0	0	0	0	0	0	1	0	1	24.4444	0.248973	0
1684	1	1	61	0	0	0	0	0	0	0	0	0	1	0	0	0	0	0	0	0	0	1	0	1	67.2489	0.554085	1
1685	0	1	38	0	0	0	0	0	0	0	0	0	0	0	0	0	0	0	0	0	0	0	0	1	31.1111	0.289398	0
1686	0	1	28	1	0	0	0	0	0	0	0	0	1	0	0	0	0	0	0	0	0	0	0	1	20	0.224212	0
1687	0	1	24	0	0	0	0	0	0	0	0	0	0	0	0	0	0	0	0	0	0	0	0	1	15.5556	0.201254	0
1688	0	0	30	0	0	0	0	0	0	0	0	0	0	0	0	0	0	0	0	0	0	0	0	1	29.6624	0.280289	0
1689	0	1	27	0	0	0	0	0	0	0	0	0	0	0	0	0	0	0	0	0	0	0	0	1	18.8889	0.218303	0
1690	0	1	36	1	0	1	0	0	0	0	0	0	1	0	0	0	0	0	0	0	0	1	0	1	28.8889	0.275498	0
1691	1	1	73	0	0	0	0	0	0	0	0	0	0	0	0	0	0	0	0	0	0	1	1	1	80.5823	0.652209	1
1692	1	0	58	0	0	0	0	0	0	0	0	1	0	0	0	0	0	0	0	0	0	0	0	1	85.4786	0.68566	1
1693	1	0	82	0	0	0	0	0	1	0	0	0	0	1	0	0	0	0	0	0	0	1	0	1	107.516	0.811556	1
1694	0	1	39	0	0	0	0	0	0	0	0	0	1	0	0	0	0	0	0	0	0	0	0	1	32.2222	0.296502	0
1695	0	1	55	0	0	1	0	0	0	0	0	0	0	0	0	0	0	0	0	0	0	1	0	1	50	0.421834	1
1696	1	0	59	0	0	1	0	0	0	0	0	0	0	0	0	0	0	0	0	0	0	1	0	1	72.4669	0.593453	1
1697	0	1	19	0	0	0	0	0	0	0	0	0	0	0	0	0	0	0	0	0	0	1	0	1	10	0.175091	0
1698	1	0	34	0	0	1	0	0	0	0	0	0	0	0	0	0	0	0	0	0	0	0	0	1	44.6891	0.382445	0
1699	0	1	35	0	0	0	0	0	0	0	0	0	0	1	0	0	0	0	0	0	0	0	0	1	37.2713	0.330006	0
1700	0	1	34	0	0	0	0	0	0	0	0	1	0	0	0	0	0	0	0	0	0	0	0	1	40.7895	0.354445	0
1701	1	1	43	0	0	0	0	0	0	0	0	0	0	0	0	0	0	0	0	0	0	1	0	1	47.2489	0.401272	1
1702	0	0	50	0	0	0	0	0	0	0	0	0	0	0	0	0	0	0	0	0	0	1	0	1	51.8846	0.436083	1
1703	0	1	25	1	1	0	1	0	0	0	0	0	0	0	0	0	0	0	0	0	0	1	0	1	16.6667	0.206824	0
1704	1	0	52	0	0	1	0	0	0	0	0	0	0	0	0	0	0	0	0	0	0	0	0	1	64.6891	0.534489	1
1705	0	1	21	0	0	0	0	0	0	0	0	0	1	0	0	0	0	0	0	0	0	1	1	1	12.2222	0.185221	0
1706	0	1	59	0	0	1	0	0	0	0	0	0	0	1	0	0	0	0	0	0	0	0	0	1	63.938	0.528716	1
1707	0	0	31	0	0	0	0	0	0	0	0	1	0	0	0	0	0	0	0	0	0	0	0	1	44.8964	0.383957	0
1708	1	1	32	0	0	1	0	0	0	0	0	1	0	1	0	0	0	0	0	0	0	0	0	1	58.6431	0.487889	1
1709	1	0	44	0	0	1	0	0	0	0	0	0	0	0	0	0	0	0	0	0	0	1	0	1	55.8002	0.466001	1
1710	0	1	34	1	0	0	0	0	1	0	0	0	0	0	0	0	0	0	0	0	0	0	0	1	26.6667	0.262019	0
1711	1	0	70	0	0	0	0	0	0	0	0	0	0	0	0	0	0	0	0	0	0	1	0	1	84.6891	0.680383	1
1712	0	0	57	0	0	0	0	0	0	0	0	0	1	0	0	0	0	0	0	0	0	1	0	1	59.6624	0.495753	1
1713	0	1	34	0	0	0	0	0	0	0	0	0	0	0	0	0	0	0	0	0	0	0	0	1	26.6667	0.262019	0
1714	0	1	22	0	0	0	0	0	0	0	0	0	0	0	0	0	0	0	0	0	0	1	0	1	13.3333	0.190453	0
1715	1	0	72	0	0	1	0	0	0	0	0	0	0	0	0	1	0	0	0	0	0	1	0	1	86.9113	0.695112	1
1716	1	0	59	0	0	0	0	0	0	0	0	0	0	0	0	0	0	0	0	0	0	1	0	1	72.4669	0.593453	1
1717	0	1	68	0	0	0	0	0	0	0	0	0	0	0	0	0	0	0	0	0	0	1	0	1	64.4444	0.532609	1
1718	1	0	68	0	0	0	0	0	0	0	0	0	0	0	0	0	0	0	0	0	0	1	0	1	82.4669	0.665285	1
1719	0	1	29	1	1	0	1	0	0	0	0	0	0	0	0	0	0	0	0	0	0	0	0	1	21.1111	0.230234	0
1720	1	0	62	0	0	0	0	0	0	0	0	0	1	1	0	0	0	0	0	0	0	1	0	1	85.2938	0.684428	1
1721	1	1	41	0	0	1	0	0	0	0	0	0	0	0	0	0	0	1	0	0	0	1	0	1	45.0267	0.384909	1
1722	0	1	24	1	1	0	1	0	0	0	1	0	0	0	0	0	0	0	0	0	0	0	0	1	15.5556	0.201254	0
1723	0	1	32	0	0	0	0	0	0	0	0	0	0	0	0	0	0	0	0	0	0	0	0	1	24.4444	0.248973	0
1724	0	0	63	1	1	0	0	0	0	0	0	0	1	0	0	0	0	0	0	0	1	1	1	1	66.3291	0.54706	1
1725	0	1	50	0	0	0	0	0	0	0	0	0	0	0	0	0	0	0	0	0	0	0	0	1	44.4444	0.380663	0
1726	0	0	48	0	0	0	0	0	0	0	0	0	0	0	0	0	0	0	0	0	0	0	0	1	49.6624	0.419295	1
1727	0	1	36	0	0	0	0	0	0	0	0	0	0	0	0	0	0	0	0	0	0	1	0	1	28.8889	0.275498	0
1728	0	0	40	0	0	0	0	0	0	0	0	0	0	0	0	0	0	0	0	0	0	1	0	1	40.7735	0.354332	0
1729	0	1	48	0	0	0	0	0	1	1	0	0	0	0	1	0	0	0	0	0	0	1	1	1	104.862	0.798704	1
1730	0	1	29	0	0	0	0	0	0	0	1	0	0	0	0	0	0	0	0	0	0	1	0	1	21.1111	0.230234	0
1731	0	1	32	0	0	0	0	0	0	0	1	0	0	0	0	0	0	0	0	0	0	1	0	1	24.4444	0.248973	0
1732	1	0	63	0	0	0	0	0	0	0	0	0	1	1	0	0	0	0	0	0	0	0	0	1	86.4049	0.691789	1
1733	1	0	70	0	0	0	0	0	0	0	0	0	0	0	0	0	0	0	0	0	0	0	0	1	84.6891	0.680383	1
1734	1	1	41	0	0	0	0	0	0	0	0	0	1	0	0	0	0	0	0	0	0	0	0	1	45.0267	0.384909	1
1735	0	1	32	0	0	0	0	0	0	0	0	0	0	1	0	0	0	0	0	0	0	0	0	1	33.938	0.307667	0
1736	1	1	50	0	0	0	0	0	0	0	0	0	0	0	0	0	0	0	0	0	0	1	0	1	55.0267	0.460064	1
1737	1	1	67	0	0	1	0	0	0	0	0	0	0	0	0	1	0	0	0	0	0	0	0	1	73.9156	0.604195	1
1738	0	1	64	0	0	1	0	0	0	0	0	0	0	0	0	0	0	0	0	0	0	0	0	1	60	0.498358	1
1739	1	0	38	0	0	1	0	0	0	0	0	0	1	0	0	0	0	0	0	0	0	1	0	1	49.1336	0.415325	1
1740	0	0	68	0	0	1	0	0	0	0	0	0	0	0	1	0	0	0	0	0	0	1	1	1	71.8846	0.58911	1
1741	0	1	24	0	0	0	0	0	0	0	0	0	1	0	0	0	0	0	0	0	0	0	0	1	15.5556	0.201254	0
1742	0	1	23	0	0	0	0	0	0	0	1	0	0	0	0	0	0	0	0	0	0	1	0	1	14.4444	0.195797	0
1743	0	1	23	1	1	0	1	0	0	0	0	0	1	0	0	0	0	0	0	0	0	0	0	1	14.4444	0.195797	0
1744	0	1	35	0	0	0	0	0	0	0	0	0	0	0	0	0	0	0	0	0	0	1	0	1	27.7778	0.268705	0
1745	0	1	44	0	0	0	0	0	0	0	0	0	0	0	0	0	0	0	0	0	0	0	0	1	37.7778	0.333472	0
1746	0	1	32	0	0	0	0	0	0	0	0	0	1	0	0	0	0	0	0	0	0	0	0	1	24.4444	0.248973	0
1747	0	1	42	0	0	0	0	0	0	0	0	0	0	0	0	0	0	0	0	0	0	0	0	1	35.5556	0.318404	0
1748	0	1	22	1	1	0	1	0	0	0	1	0	0	0	0	0	0	0	0	0	0	0	0	1	13.3333	0.190453	0
1749	0	0	36	0	0	0	0	0	0	0	0	0	0	0	0	0	0	0	0	0	0	0	0	1	36.3291	0.323608	0
1750	0	1	40	0	0	1	0	0	0	0	0	0	0	0	0	0	0	0	0	0	0	1	0	1	33.3333	0.303706	0
1751	1	0	23	0	0	0	0	0	0	0	0	0	0	0	1	0	0	0	0	0	0	1	0	1	32.4669	0.29808	0
1752	1	1	75	0	0	0	0	0	0	0	0	0	0	0	0	0	0	0	0	0	0	0	0	1	82.8045	0.667602	1
1753	0	0	54	0	0	0	0	0	0	0	0	0	1	1	0	0	0	0	0	0	0	0	0	1	65.8226	0.543183	1
1754	1	1	59	0	0	1	0	0	0	0	0	0	0	0	0	0	0	1	0	0	0	0	0	1	65.0267	0.537081	1
1755	0	1	23	1	1	0	1	0	0	0	0	0	0	0	0	0	0	0	0	0	0	0	0	1	14.4444	0.195797	0
1756	1	1	82	0	0	0	0	0	0	0	0	0	0	1	0	0	0	0	0	0	0	1	1	1	100.076	0.773904	1
1757	0	1	32	1	1	0	0	0	0	0	0	0	0	0	0	0	0	0	0	0	0	0	0	1	24.4444	0.248973	0
1758	0	1	32	1	0	0	0	0	0	0	0	0	0	0	0	0	0	0	0	0	0	0	0	1	24.4444	0.248973	0
1759	0	1	22	0	0	1	0	0	0	0	0	0	1	0	0	0	0	0	0	0	0	0	0	1	13.3333	0.190453	0
1760	0	1	41	0	1	0	0	0	0	0	0	0	0	0	0	0	0	0	1	0	0	0	0	1	34.4444	0.311007	0
1761	0	1	18	1	0	0	0	0	0	0	1	0	0	0	0	0	0	0	0	0	0	0	0	1	8.88889	0.170193	0
1762	1	1	51	0	0	0	0	0	0	0	0	0	0	0	0	0	0	0	0	0	0	1	0	1	56.1378	0.468595	1
1763	1	1	64	0	0	0	0	0	0	0	0	0	0	0	1	0	0	0	0	0	0	0	0	1	70.5823	0.579345	1
1764	1	1	59	0	0	1	0	0	0	0	0	0	0	0	0	0	0	0	0	0	0	1	0	1	65.0267	0.537081	1
1765	1	1	53	0	0	0	0	0	0	0	0	0	1	0	0	0	0	0	0	0	0	0	0	1	58.36	0.485706	1
1766	0	1	24	0	0	0	0	0	0	0	0	0	0	0	0	0	0	0	0	0	0	0	0	1	15.5556	0.201254	0
1767	0	0	71	0	0	0	0	0	0	0	0	0	0	0	0	0	0	0	0	0	0	0	0	1	75.218	0.613768	1
1768	0	1	24	1	1	0	1	0	0	0	0	1	0	0	0	0	0	0	0	0	0	1	0	1	29.6784	0.280389	0
1769	0	1	32	0	0	0	0	0	0	0	0	0	0	0	0	0	0	0	0	0	0	0	0	1	24.4444	0.248973	0
1770	1	0	60	0	0	0	0	0	0	0	0	0	0	0	0	0	0	0	0	0	0	1	0	1	73.578	0.601701	1
1771	0	1	35	0	0	0	0	0	0	0	0	0	0	0	0	0	0	0	0	0	0	0	0	1	27.7778	0.268705	0
1772	0	1	38	0	0	0	0	0	0	0	0	0	0	0	0	0	0	0	0	0	0	0	0	1	31.1111	0.289398	0
1773	0	1	36	0	0	0	0	0	0	0	0	0	0	0	0	0	0	0	0	0	0	1	1	1	28.8889	0.275498	0
1774	1	1	76	0	0	0	0	0	0	0	0	0	0	0	0	0	0	0	0	0	0	1	1	1	83.9156	0.675169	1
1775	1	1	23	0	0	0	0	0	0	0	1	0	0	0	0	0	0	0	0	0	0	0	0	1	25.0267	0.252349	0
1776	1	0	23	0	0	1	0	0	0	0	0	0	0	0	0	0	0	0	0	0	0	1	0	1	32.4669	0.29808	0
1777	0	1	39	0	0	0	0	0	0	0	0	0	0	0	0	0	0	0	0	0	0	0	0	1	32.2222	0.296502	0
1778	0	1	44	0	0	0	0	0	0	0	0	0	0	0	0	0	0	0	0	0	0	0	0	1	37.7778	0.333472	0
1779	0	1	33	0	0	0	0	0	0	0	0	0	0	0	0	0	0	0	0	0	0	0	0	1	25.5556	0.255442	0
1780	1	0	48	0	0	0	0	0	0	0	0	0	0	0	0	0	0	0	0	0	0	0	0	1	60.2447	0.500246	1
1781	1	1	70	0	0	0	0	0	0	0	0	0	0	0	0	0	0	0	0	0	0	1	0	1	77.2489	0.628519	1
1782	0	1	44	0	0	0	0	0	0	0	0	0	0	0	0	0	0	0	0	0	0	1	0	1	37.7778	0.333472	0
1783	1	1	72	0	0	1	0	0	0	0	0	0	0	0	1	0	0	0	0	0	0	1	0	1	79.4711	0.644389	1
1784	0	1	28	0	0	0	0	0	0	0	0	0	0	0	0	0	0	0	0	0	0	0	0	1	20	0.224212	0
1785	0	1	52	0	1	0	0	0	0	0	0	0	0	0	0	0	0	0	1	0	0	1	0	1	46.6667	0.396962	1
1786	1	0	36	0	0	0	0	0	0	0	0	0	0	0	0	0	0	0	0	0	0	0	0	1	46.9113	0.398771	1
1787	0	1	29	0	0	0	0	0	0	0	0	0	0	0	0	0	0	0	0	0	0	0	0	1	21.1111	0.230234	0
1788	1	0	73	0	0	0	0	0	0	0	0	0	0	0	0	0	0	0	0	0	1	1	0	1	88.0225	0.702332	1
1789	0	1	30	0	1	0	0	0	0	0	0	0	0	0	0	0	0	0	0	0	0	1	0	1	22.2222	0.236369	0
1790	0	1	22	1	1	0	1	0	0	0	0	0	0	0	0	0	0	0	0	0	0	0	0	1	13.3333	0.190453	0
1791	1	0	65	0	0	1	0	0	0	0	0	0	0	0	0	0	0	0	0	0	0	0	0	1	79.1336	0.641998	1
1792	0	1	30	0	0	0	0	0	0	0	0	0	1	0	0	0	0	0	0	0	0	0	0	1	22.2222	0.236369	0
1793	0	1	29	0	0	0	0	0	0	0	0	0	0	0	0	0	0	0	0	0	0	1	0	1	21.1111	0.230234	0
1794	1	1	32	0	0	0	0	0	0	0	0	0	0	0	0	0	0	0	0	0	0	0	0	1	35.0267	0.314871	0
1795	0	1	23	0	0	0	0	0	0	0	0	0	0	0	1	0	0	0	0	0	0	0	0	1	14.4444	0.195797	0
1796	0	1	20	0	0	0	0	0	0	0	1	0	0	0	0	0	0	0	0	0	0	0	0	1	11.1111	0.1801	0
1797	1	1	81	0	0	0	0	0	0	0	0	0	0	0	0	0	0	0	0	0	0	1	0	1	89.4711	0.711595	1
1798	0	1	28	0	0	0	0	0	0	0	0	0	0	0	0	0	0	0	0	0	0	1	0	1	20	0.224212	0
1799	0	1	57	0	0	0	0	0	0	0	0	0	0	0	0	0	0	0	0	0	0	0	0	1	52.2222	0.438648	1
1800	1	0	42	0	0	0	0	0	0	0	0	0	0	0	0	0	0	0	0	0	0	0	0	1	53.578	0.448978	1
1801	0	0	31	0	0	0	0	0	0	0	0	0	0	0	0	0	0	0	0	0	0	0	0	1	30.7735	0.28726	0
1802	1	0	81	0	0	0	0	0	0	0	0	0	0	1	0	0	0	0	0	0	0	1	1	1	106.405	0.806255	1
1803	0	1	26	1	1	0	1	0	0	0	0	0	0	0	0	0	0	0	0	0	0	0	0	1	17.7778	0.212507	0
1804	1	1	17	1	1	0	1	0	0	0	0	0	1	0	0	0	0	0	0	0	0	0	0	1	18.36	0.21553	0
1805	0	1	44	0	0	0	0	0	0	0	0	0	0	0	0	0	0	0	0	0	0	0	0	1	37.7778	0.333472	0
1806	0	1	34	1	1	0	0	0	0	0	0	0	0	0	0	0	0	0	0	0	0	0	0	1	26.6667	0.262019	0
1807	0	1	96	0	0	0	0	0	0	0	0	0	0	0	0	0	0	0	0	0	1	1	1	1	95.5555	0.748562	1
1808	1	1	60	1	1	0	1	0	1	0	0	0	0	0	0	0	0	0	1	0	0	0	0	1	66.1378	0.545596	1
1809	1	1	21	0	0	0	0	0	0	0	0	0	0	0	0	0	0	0	0	0	0	1	0	1	22.8045	0.239628	0
1810	0	1	37	0	0	0	0	0	0	0	0	0	0	0	1	0	0	0	0	0	0	0	0	1	30	0.282396	0
1811	1	0	57	0	0	1	0	0	0	0	0	0	0	0	0	0	0	0	0	0	0	0	0	1	70.2447	0.576803	1
1812	1	0	77	0	0	0	0	0	0	0	0	0	0	0	0	0	0	0	0	0	0	1	0	1	92.4669	0.730196	1
1813	0	1	49	0	0	0	0	0	0	0	0	0	0	0	0	0	0	0	0	0	0	1	0	1	43.3333	0.37261	0
1814	0	1	19	0	0	0	0	0	0	0	0	0	0	0	0	0	0	0	0	0	0	1	0	1	10	0.175091	0
1815	0	1	29	0	0	0	0	0	0	0	0	0	0	0	0	0	0	0	0	0	0	1	0	1	21.1111	0.230234	0
1816	0	0	31	0	0	1	0	0	0	0	0	0	0	0	0	0	0	0	0	0	0	1	0	1	30.7735	0.28726	0
1817	1	1	43	0	0	1	0	0	0	0	0	0	0	0	0	0	0	0	0	0	0	0	0	1	47.2489	0.401272	1
1818	0	1	38	0	0	0	0	0	0	0	0	0	0	0	0	0	0	0	0	0	0	0	0	1	31.1111	0.289398	0
1819	0	1	27	0	0	0	0	0	0	0	0	0	0	0	0	0	0	0	0	0	0	0	0	1	18.8889	0.218303	0
1820	0	0	58	0	0	1	0	0	0	0	0	0	0	1	0	0	0	0	0	0	0	1	0	1	70.2671	0.576972	1
1821	0	1	43	0	0	0	0	0	0	0	1	0	0	0	0	0	0	0	0	0	0	1	0	1	36.6667	0.325893	0
1822	1	1	34	1	0	1	0	0	0	0	0	0	0	0	0	0	0	0	0	0	0	1	0	1	37.2489	0.329854	0
1823	0	1	19	0	0	0	0	0	0	0	1	0	0	0	0	0	0	0	0	0	0	1	0	1	10	0.175091	0
1824	0	1	21	0	0	0	0	0	0	0	1	0	0	0	0	0	0	0	0	0	0	0	0	1	12.2222	0.185221	0
1825	0	1	52	1	1	0	1	0	0	0	0	0	0	0	0	0	0	0	0	0	0	1	0	1	46.6667	0.396962	1
1826	0	1	33	0	0	0	0	0	0	0	0	0	1	0	0	0	0	0	0	0	0	0	0	1	25.5556	0.255442	0
1827	0	1	32	0	0	1	0	0	0	0	0	0	0	0	0	0	0	0	0	0	0	0	0	1	24.4444	0.248973	0
1828	1	0	77	0	0	0	0	0	0	1	0	0	0	0	0	0	0	0	0	0	0	1	1	1	155.106	0.949269	1
1829	0	1	59	0	0	0	0	0	0	0	0	0	0	0	0	0	0	0	0	0	0	1	0	1	54.4444	0.455603	1
1830	0	1	43	0	1	0	0	0	0	0	0	0	0	0	0	0	0	0	0	0	0	1	0	1	36.6667	0.325893	0
1831	1	1	58	0	0	0	0	0	0	0	0	0	0	0	0	0	0	0	0	0	0	1	0	1	63.9156	0.528543	1
1832	0	1	44	0	0	0	0	0	0	0	0	0	0	0	0	0	0	0	0	0	0	1	0	1	37.7778	0.333472	0
1833	1	0	45	1	1	0	1	0	0	0	0	0	0	0	0	0	0	0	0	0	0	1	0	1	56.9113	0.474545	1
1834	0	1	42	0	0	0	0	0	0	0	0	0	0	1	0	0	0	1	0	0	0	1	0	1	45.0491	0.385073	1
1835	1	1	67	0	0	0	0	0	0	0	0	0	0	0	0	0	0	0	0	0	0	1	0	1	73.9156	0.604195	1
1836	0	1	25	0	0	0	0	0	0	0	0	0	0	0	0	0	0	0	0	0	0	0	0	1	16.6667	0.206824	0
1837	0	1	45	0	0	0	0	0	0	0	0	0	0	0	0	0	0	0	0	0	0	0	0	1	38.8889	0.341138	0
1838	0	1	28	0	0	0	0	0	0	0	0	0	0	0	0	0	0	0	0	0	0	0	0	1	20	0.224212	0
1839	0	1	40	0	0	0	0	0	0	0	0	0	0	0	0	0	0	0	0	0	0	0	0	1	33.3333	0.303706	0
1840	0	1	47	0	0	0	0	0	0	0	0	0	0	0	0	0	0	0	0	0	0	0	0	1	41.1111	0.35672	0
1841	0	1	35	0	0	0	0	0	0	0	0	0	0	0	0	0	0	0	0	0	0	0	0	1	27.7778	0.268705	0
1842	0	1	19	1	1	0	0	0	0	0	0	0	0	0	0	0	0	0	0	0	0	1	0	1	10	0.175091	0
1843	0	1	30	0	0	0	0	0	0	0	0	0	0	0	0	0	0	0	0	0	0	0	0	1	22.2222	0.236369	0
1844	0	1	35	1	0	1	0	0	0	0	0	0	0	0	0	0	0	0	0	0	0	0	0	1	27.7778	0.268705	0
1845	0	1	48	0	0	0	0	0	0	0	0	0	0	0	0	0	0	0	0	0	0	0	0	1	42.2222	0.364628	0
1846	1	0	69	0	0	0	0	0	0	0	1	0	0	0	0	0	0	0	0	0	0	0	0	1	83.578	0.672879	1
1847	0	1	58	0	0	0	0	0	0	0	0	0	0	0	0	0	1	0	0	0	0	0	0	1	53.3333	0.44711	1
1848	1	0	62	0	0	0	0	0	0	0	0	0	0	1	0	0	0	0	0	0	0	1	0	1	85.2938	0.684428	1
1849	1	0	31	0	0	0	0	0	0	0	0	0	1	0	0	0	0	0	0	0	0	0	0	1	41.3558	0.358455	0
1850	0	1	23	0	0	0	0	0	0	0	0	0	0	0	0	0	0	0	0	0	0	0	0	1	14.4444	0.195797	0
1851	0	1	20	0	0	0	0	0	0	0	0	0	0	0	0	0	0	0	0	0	0	0	0	1	11.1111	0.1801	0
1852	0	1	29	0	0	0	0	0	0	0	0	0	0	0	0	0	0	0	0	0	0	0	0	1	21.1111	0.230234	0
1853	1	1	77	1	1	0	1	0	0	0	0	0	0	1	0	0	0	0	0	0	0	1	1	1	94.5202	0.742499	1
1854	1	0	60	0	0	0	0	0	0	0	0	0	0	1	0	0	0	0	0	0	0	1	0	1	83.0715	0.669429	1
1855	0	1	31	0	0	0	0	0	0	0	0	0	0	0	0	0	0	0	0	0	0	0	0	1	23.3333	0.242615	0
1856	1	1	46	0	0	0	0	0	0	0	0	0	0	1	0	0	0	0	0	0	0	1	1	1	60.0758	0.498943	1
1857	0	1	38	0	0	0	0	0	0	0	0	0	0	0	0	0	0	0	0	0	0	1	0	1	31.1111	0.289398	0
1858	0	1	55	0	0	0	0	0	0	0	0	0	0	0	0	0	0	0	0	0	0	1	0	1	50	0.421834	1
1859	1	1	46	0	0	0	0	0	0	0	0	0	0	0	1	0	0	0	0	0	0	0	0	1	50.5823	0.426224	1
1860	0	1	29	0	1	0	0	0	0	0	0	0	0	0	0	0	0	0	0	0	0	0	0	1	21.1111	0.230234	0
1861	0	1	25	0	0	0	0	0	0	0	0	0	0	0	0	0	0	0	0	0	0	0	0	1	16.6667	0.206824	0
1862	0	0	19	0	0	0	0	0	0	0	0	0	0	0	0	0	0	0	0	0	0	0	0	1	17.4402	0.210768	0
1863	0	1	59	0	0	0	0	0	0	0	0	0	0	0	0	0	0	0	0	0	0	1	0	1	54.4444	0.455603	1
1864	0	1	18	0	0	0	0	0	0	0	0	0	0	0	0	0	0	0	0	0	0	0	0	1	8.88889	0.170193	0
1865	1	1	68	0	0	0	0	0	0	0	0	0	0	0	0	0	0	0	0	0	0	0	0	1	75.0267	0.612367	1
1866	0	1	31	0	0	0	0	0	0	0	1	0	0	0	0	0	0	0	0	0	0	0	0	1	23.3333	0.242615	0
1867	1	1	72	0	0	0	0	0	0	0	0	0	0	1	0	0	0	0	0	0	0	0	0	1	88.9647	0.708376	1
1868	0	1	46	0	0	1	0	0	0	0	0	0	0	0	1	0	0	0	0	0	0	0	0	1	40	0.348889	0
1869	1	1	43	0	0	0	0	0	0	0	0	0	0	0	0	0	0	0	0	0	0	0	0	1	47.2489	0.401272	1
1870	0	1	21	0	0	0	0	0	0	0	0	0	1	1	0	0	0	0	0	0	0	0	0	1	21.7158	0.233559	0
1871	0	1	25	0	1	0	0	0	0	0	0	0	1	0	0	0	0	0	0	0	0	0	0	1	16.6667	0.206824	0
1872	1	1	67	0	0	0	0	0	0	0	0	0	0	0	0	0	0	0	0	0	0	1	0	1	73.9156	0.604195	1
1873	1	0	79	0	0	1	0	0	0	0	0	0	0	0	0	0	0	0	0	0	0	0	0	1	94.6891	0.743495	1
1874	1	1	52	0	1	0	0	0	0	0	0	0	0	0	0	0	0	0	0	0	0	1	0	1	57.2489	0.477144	1
1875	1	1	69	1	1	0	1	0	0	0	0	0	0	1	0	0	0	0	1	0	0	1	1	1	85.6313	0.686675	1
1876	0	1	24	0	0	0	0	0	0	0	0	0	0	0	0	0	0	0	0	0	0	0	0	1	15.5556	0.201254	0
1877	0	0	34	0	0	0	0	0	0	0	0	1	0	0	0	0	0	0	0	0	0	0	0	1	48.2297	0.408567	1
1878	0	1	22	1	1	0	1	0	0	0	0	0	0	0	0	0	0	0	0	0	0	0	0	1	13.3333	0.190453	0
1879	0	1	31	0	0	0	0	0	0	0	1	0	0	0	0	0	0	0	0	0	0	0	0	1	23.3333	0.242615	0
1880	1	0	25	0	0	0	0	0	0	0	0	0	0	0	0	0	0	0	0	0	0	0	0	1	34.6891	0.312628	0
1881	1	1	59	0	0	1	0	0	0	0	0	0	0	0	0	0	0	0	0	0	0	1	0	1	65.0267	0.537081	1
1882	0	0	43	0	0	0	0	0	0	0	0	0	0	0	0	0	0	0	0	0	0	1	0	1	44.1069	0.378209	0
1883	0	0	22	0	0	0	0	0	0	0	0	0	0	0	0	1	0	0	0	0	0	1	0	1	20.7735	0.228393	0
1884	0	1	33	0	0	0	0	0	0	0	0	0	0	0	0	0	0	0	0	0	0	0	0	1	25.5556	0.255442	0
1885	1	0	62	0	1	0	0	0	0	1	0	0	0	0	0	0	0	0	0	0	0	1	1	1	138.44	0.917941	1
1886	0	1	21	0	0	0	0	0	0	0	0	0	0	0	1	0	0	0	0	0	0	0	0	1	12.2222	0.185221	0
1887	1	0	22	1	1	0	1	0	0	0	0	1	0	0	0	0	0	0	0	0	0	1	1	1	45.4786	0.388217	1
1888	0	0	20	0	0	0	0	0	0	0	0	0	0	0	0	0	0	0	0	0	0	1	0	1	18.5513	0.21653	0
1889	0	1	29	0	0	0	0	0	0	0	0	0	0	0	0	0	0	0	0	0	0	0	0	1	21.1111	0.230234	0
1890	1	1	71	0	0	0	0	0	1	0	0	0	0	0	1	0	0	0	0	0	1	1	0	1	78.36	0.636491	1
1891	0	1	56	0	0	0	0	0	0	0	0	0	0	0	0	0	0	0	0	0	0	0	0	1	51.1111	0.430221	1
1892	1	1	73	0	0	0	0	0	0	0	0	1	0	0	0	0	0	0	0	0	0	1	0	1	94.7051	0.743589	1
1893	0	1	53	0	0	0	0	0	0	0	0	0	0	0	0	0	0	0	0	0	0	0	0	1	47.7778	0.4052	1
1894	0	1	57	0	0	0	0	0	0	0	0	0	0	0	0	0	0	0	0	0	0	0	0	1	52.2222	0.438648	1
1895	1	1	55	0	0	1	0	0	0	0	0	0	0	0	1	0	0	0	0	0	0	0	0	1	60.5823	0.502851	1
1896	0	1	25	0	0	0	0	0	0	0	0	0	1	0	0	0	0	0	0	0	0	1	0	1	16.6667	0.206824	0
1897	0	1	22	0	1	0	0	0	0	0	0	0	0	0	0	0	0	0	0	0	0	0	0	1	13.3333	0.190453	0
1898	1	1	40	1	0	0	0	0	0	0	0	0	0	1	0	0	0	0	0	0	0	1	1	1	53.4091	0.447688	1
1899	0	1	40	0	0	0	0	0	0	0	0	0	0	0	0	0	0	0	0	0	0	1	0	1	33.3333	0.303706	0
1900	1	0	64	0	0	0	0	0	0	1	0	0	0	0	0	0	0	0	0	0	0	1	1	1	140.662	0.922962	1
1901	0	1	29	0	0	0	0	0	0	0	0	0	0	0	0	0	0	0	0	0	0	0	0	1	21.1111	0.230234	0
1902	1	0	62	0	0	0	0	0	0	0	0	0	1	0	0	0	0	0	0	0	0	1	1	1	75.8002	0.61802	1
1903	0	1	39	0	0	0	0	0	0	0	0	0	0	0	0	0	0	0	0	0	0	0	0	1	32.2222	0.296502	0
1904	1	1	62	0	0	0	0	0	0	0	0	0	0	0	0	0	0	0	0	0	0	1	0	1	68.36	0.562543	1
1905	0	1	44	0	0	0	0	0	0	0	0	0	0	0	0	0	0	0	0	0	0	1	0	1	37.7778	0.333472	0
1906	0	1	24	0	0	0	0	0	0	0	0	0	0	0	0	0	0	0	0	0	0	1	0	1	15.5556	0.201254	0
1907	0	1	60	0	1	0	0	0	0	0	0	0	0	0	0	0	0	0	0	0	0	0	0	1	55.5555	0.464122	1
1908	0	0	47	0	0	0	0	0	0	0	0	0	0	0	0	0	0	0	0	0	0	1	0	1	48.5513	0.410968	1
1909	1	0	37	0	0	0	0	0	0	0	0	0	1	1	0	0	0	0	0	0	0	0	0	1	57.516	0.479201	1
1910	0	1	29	0	0	0	0	0	0	0	0	0	0	0	0	0	0	0	0	0	0	0	0	1	21.1111	0.230234	0
1911	1	0	47	0	0	0	0	0	0	0	0	0	0	0	0	0	0	0	0	0	0	1	0	1	59.1336	0.491672	1
1912	1	0	77	0	0	0	0	0	0	0	0	1	0	0	0	0	0	1	0	0	0	1	1	1	106.59	0.807144	1
1913	1	1	72	0	0	0	0	0	0	0	0	0	0	0	0	0	0	0	0	0	0	1	0	1	79.4711	0.644389	1
1914	0	1	33	0	0	0	0	0	0	0	0	0	0	0	0	0	0	0	0	0	0	0	0	1	25.5556	0.255442	0
1915	1	0	48	0	0	0	1	0	0	0	0	0	0	0	0	0	0	0	0	0	0	0	0	1	60.2447	0.500246	1
1916	0	1	22	0	0	0	0	0	1	0	0	0	0	0	0	0	0	0	0	0	0	0	0	1	13.3333	0.190453	0
1917	1	1	62	0	0	0	0	0	0	0	0	0	0	0	0	0	0	0	0	0	0	1	0	1	68.36	0.562543	1
1918	0	1	25	0	0	0	0	0	0	0	0	0	0	1	0	0	0	0	0	0	0	0	0	1	26.1602	0.259007	0
1919	0	0	23	0	1	0	0	0	0	0	0	0	0	0	0	0	0	0	0	0	0	0	0	1	21.8846	0.234493	0
1920	1	1	40	0	0	0	0	0	0	0	0	0	0	0	0	0	0	0	0	0	0	0	0	1	43.9156	0.376822	0
1921	1	1	39	0	0	0	0	0	0	0	0	0	0	1	0	0	0	0	0	0	0	1	0	1	52.298	0.439224	1
1922	0	0	45	0	0	0	0	0	0	0	0	0	0	0	0	0	0	0	0	0	0	0	0	1	46.3291	0.39447	1
1923	1	0	49	0	0	0	0	0	0	0	0	0	1	1	0	0	0	0	0	0	0	1	0	1	70.8493	0.581352	1
1924	1	1	80	0	0	0	0	0	0	0	0	0	0	0	0	0	0	0	0	0	0	1	0	1	88.36	0.704506	1
1925	1	0	67	0	0	1	0	1	1	0	0	0	0	0	0	0	0	0	0	0	0	0	0	1	119.746	0.862673	1
1926	0	1	40	0	0	0	0	0	0	0	0	0	0	0	1	0	0	0	0	0	0	0	0	1	33.3333	0.303706	0
1927	0	1	34	0	0	0	0	0	0	0	0	0	0	0	1	0	0	0	0	0	0	0	0	1	26.6667	0.262019	0
1928	0	1	53	0	0	0	0	0	0	0	0	0	0	0	0	0	0	0	0	0	0	1	0	1	47.7778	0.4052	1
1929	1	0	80	0	0	0	0	0	0	0	0	0	1	0	0	0	0	0	0	0	0	1	0	1	95.8002	0.749981	1
1930	0	1	33	0	1	0	0	0	0	0	0	0	0	0	0	0	0	0	0	0	0	0	0	1	25.5556	0.255442	0
1931	0	0	30	0	0	1	0	0	0	0	0	0	0	0	0	0	0	0	0	0	0	0	0	1	29.6624	0.280289	0
1932	1	1	77	0	0	0	0	0	0	1	0	0	0	0	0	0	0	0	0	0	0	1	1	1	147.666	0.936997	1
1933	0	0	27	0	0	0	0	0	0	0	1	0	0	0	0	0	0	0	0	0	0	0	0	1	26.3291	0.260009	0
1934	0	1	45	0	0	0	0	0	0	0	0	0	0	0	0	0	0	0	0	0	0	0	0	1	38.8889	0.341138	0
1935	0	1	29	0	0	0	0	0	0	0	0	0	0	0	0	0	0	0	0	0	0	0	0	1	21.1111	0.230234	0
1936	0	0	66	0	0	0	0	0	0	0	0	0	0	0	0	0	0	0	0	0	0	0	0	1	69.6624	0.57241	1
1937	1	0	68	0	0	1	0	0	0	0	0	0	0	1	0	0	0	0	0	0	0	1	0	1	91.9604	0.727105	1
1938	0	1	48	0	0	0	0	0	0	0	0	0	0	0	1	0	0	0	0	0	0	0	0	1	42.2222	0.364628	0
1939	0	1	34	1	1	0	0	0	0	0	0	0	0	0	0	0	0	0	0	0	0	0	0	1	26.6667	0.262019	0
1940	0	1	28	0	0	1	0	0	0	0	0	1	0	0	0	0	0	0	1	0	0	0	0	1	34.1228	0.308884	0
1941	0	0	24	0	0	0	0	0	0	0	0	0	0	0	0	0	0	0	0	0	0	0	0	1	22.9958	0.240706	0
1942	0	1	29	0	0	1	0	0	0	0	1	0	0	0	0	0	0	0	0	0	0	0	0	1	21.1111	0.230234	0
1943	0	1	22	1	1	0	1	0	0	0	0	0	0	0	0	0	0	0	0	0	0	0	0	1	13.3333	0.190453	0
1944	0	0	21	0	1	0	0	0	0	0	0	0	0	0	0	0	0	0	0	0	0	0	0	1	19.6624	0.222405	0
1945	0	1	22	1	1	0	1	0	0	0	0	0	0	0	0	0	0	0	0	0	0	0	0	1	13.3333	0.190453	0
1946	0	0	49	0	0	0	0	0	0	0	0	0	0	1	0	0	0	0	0	0	0	1	0	1	60.2671	0.500419	1
1947	0	1	24	0	0	0	0	0	0	0	0	0	0	0	0	0	0	0	0	0	0	0	0	1	15.5556	0.201254	0
1948	0	1	35	1	0	0	0	0	0	0	0	0	0	0	0	0	0	0	0	0	0	0	0	1	27.7778	0.268705	0
1949	0	0	49	0	0	0	0	0	0	0	0	0	0	0	0	0	0	0	0	0	0	0	0	1	50.7735	0.427668	1
1950	0	1	36	0	0	1	0	0	0	0	0	0	0	0	0	0	0	0	0	0	0	0	0	1	28.8889	0.275498	0
1951	0	1	26	0	0	0	0	0	0	0	0	0	0	0	0	0	0	0	0	0	0	0	0	1	17.7778	0.212507	0
1952	0	1	60	0	0	1	0	0	0	0	0	0	0	0	0	0	0	0	0	0	0	1	0	1	55.5555	0.464122	1
1953	1	1	35	0	0	0	0	0	0	0	0	0	1	0	0	0	0	0	0	0	0	1	0	1	38.36	0.337479	0
1954	1	1	35	0	0	0	0	0	1	0	0	0	0	0	1	0	0	0	1	0	0	1	1	1	38.36	0.337479	0
1955	0	1	47	0	0	0	0	0	0	0	0	0	0	0	0	0	0	0	0	0	0	1	0	1	41.1111	0.35672	0
1956	0	1	36	0	0	0	0	0	0	0	0	0	0	0	0	0	0	0	0	0	0	0	0	1	28.8889	0.275498	0
1957	1	0	72	0	0	0	0	0	0	0	0	0	0	0	0	0	0	0	0	0	0	0	0	1	86.9113	0.695112	1
1958	0	1	21	1	0	0	0	0	0	0	0	0	0	0	0	0	0	0	0	0	0	0	0	1	12.2222	0.185221	0
1959	0	1	28	0	0	0	0	0	0	0	1	0	0	0	0	0	0	0	0	0	0	0	0	1	20	0.224212	0
1960	0	1	20	0	0	0	0	0	0	0	0	0	0	0	0	0	0	0	0	0	0	0	0	1	11.1111	0.1801	0
1961	0	0	23	0	0	0	0	0	0	0	0	0	0	0	0	0	0	0	0	0	0	0	0	1	21.8846	0.234493	0
1962	0	1	34	0	0	0	0	0	0	0	0	0	0	0	0	0	0	0	0	0	0	1	0	1	26.6667	0.262019	0
1963	1	1	20	0	0	0	0	0	0	0	0	0	0	0	0	0	0	0	0	0	0	0	0	1	21.6934	0.233435	0
1964	0	1	29	1	1	0	1	0	0	0	0	0	0	0	0	0	0	0	0	0	0	0	0	1	21.1111	0.230234	0
1965	1	1	44	1	0	0	0	0	0	0	0	0	1	1	0	0	0	0	0	0	0	1	0	1	57.8536	0.481802	1
1966	0	1	42	0	0	0	0	0	0	0	0	0	0	0	0	0	0	0	0	0	0	0	0	1	35.5556	0.318404	0
1967	0	1	40	0	0	0	0	0	0	0	0	0	0	0	0	0	0	0	0	0	0	1	0	1	33.3333	0.303706	0
1968	0	1	61	0	1	0	0	0	0	0	0	0	0	0	0	0	0	0	1	0	0	1	0	1	56.6667	0.472662	1
1969	0	1	39	0	0	0	0	0	0	0	0	0	0	0	0	0	0	0	0	0	0	1	0	1	32.2222	0.296502	0
1970	0	1	50	0	0	0	0	0	0	0	0	0	0	0	0	0	0	0	0	0	0	1	0	1	44.4444	0.380663	0
1971	0	1	53	0	0	0	0	0	0	0	0	1	0	1	0	0	0	0	0	0	0	1	0	1	71.3942	0.58544	1
1972	1	0	48	0	0	0	0	0	0	0	0	0	0	0	0	0	0	0	0	0	0	1	1	1	60.2447	0.500246	1
1973	0	1	34	0	0	0	0	0	0	0	0	0	0	0	0	0	0	0	0	0	0	0	0	1	26.6667	0.262019	0
1974	0	1	21	1	1	0	1	0	0	0	0	0	0	0	0	0	0	0	0	0	1	0	0	1	12.2222	0.185221	0
1975	1	0	24	0	0	0	0	0	0	0	0	0	0	0	0	0	0	0	0	0	0	0	0	1	33.578	0.305305	0
1976	1	0	61	1	0	1	0	0	0	0	1	0	0	1	0	0	0	0	0	0	0	0	0	1	84.1827	0.676974	1
1977	1	1	69	0	0	0	0	0	0	0	0	0	0	0	0	0	0	0	0	0	0	1	0	1	76.1378	0.620477	1
1978	1	0	52	0	0	0	0	0	0	0	0	0	1	0	0	0	0	0	0	0	0	1	1	1	64.6891	0.534489	1
1979	0	1	22	1	1	0	1	0	0	0	0	1	0	0	0	0	0	0	0	0	0	0	0	1	27.4562	0.266759	0
1980	1	1	76	0	0	0	0	0	1	0	0	0	0	1	0	0	0	0	0	0	0	1	1	1	93.4091	0.735888	1
1981	0	0	29	0	0	1	0	0	0	0	0	0	0	0	0	0	0	0	0	0	0	0	0	1	28.5513	0.273423	0
1982	0	1	45	0	0	0	0	0	0	0	0	0	0	0	0	0	0	0	0	0	0	0	0	1	38.8889	0.341138	0
1983	1	0	70	1	1	0	1	0	0	0	0	0	0	1	0	1	0	0	0	0	0	1	1	1	94.1827	0.740502	1
1984	1	0	58	0	0	0	0	0	0	0	0	0	1	0	0	0	0	0	0	0	0	0	0	1	71.3558	0.585152	1
1985	0	1	33	0	0	0	0	0	0	0	0	0	0	0	0	0	0	0	0	0	0	0	0	1	25.5556	0.255442	0
1986	0	1	19	0	0	1	0	0	0	0	0	0	0	0	0	0	0	0	0	0	0	0	0	1	10	0.175091	0
1987	0	0	48	0	0	0	0	0	0	0	0	0	0	0	0	0	0	0	0	0	0	0	0	1	49.6624	0.419295	1
1988	0	1	20	0	0	1	0	0	0	0	1	0	0	0	0	0	0	0	0	0	0	0	0	1	11.1111	0.1801	0
1989	0	1	28	1	1	0	1	0	0	0	0	0	0	0	0	0	0	0	1	0	0	1	0	1	20	0.224212	0
1990	0	1	26	0	0	0	0	0	0	0	0	0	0	0	0	0	0	0	0	0	0	0	0	1	17.7778	0.212507	0
1991	0	0	26	0	0	0	0	0	0	0	1	0	0	0	0	0	0	0	0	0	0	0	0	1	25.218	0.253465	0
1992	0	1	28	0	0	0	0	0	0	0	0	0	0	0	0	0	0	0	0	0	0	0	0	1	20	0.224212	0
1993	0	1	43	0	0	0	0	0	0	0	0	0	0	0	0	0	0	0	0	0	0	0	0	1	36.6667	0.325893	0
1994	0	1	28	0	0	1	0	0	0	0	0	0	0	0	0	0	0	0	0	0	0	0	0	1	20	0.224212	0
1995	0	1	27	1	1	0	1	0	0	0	0	0	0	0	0	0	0	0	0	0	0	0	0	1	18.8889	0.218303	0
1996	0	1	48	0	0	0	0	0	0	0	0	1	0	1	0	0	0	0	0	0	0	1	1	1	65.8386	0.543306	1
1997	1	0	51	0	0	0	0	0	0	0	0	0	0	0	0	0	0	0	0	0	0	0	0	1	63.578	0.525946	1
1998	0	1	30	0	0	0	0	1	1	0	0	0	1	0	0	0	0	0	0	0	0	0	0	1	60.6126	0.503085	1
1999	0	1	31	0	0	0	0	0	0	0	0	0	0	0	0	0	0	0	0	0	0	0	0	1	23.3333	0.242615	0
[truncated: 2,623 more rows]
