# Supplementary material for: Derivation and internal validation of prediction models for pulmonary hypertension risk assessment in a cohort inhabiting Tibet, China
Source: eLife journal article supplement (doi:10.7554/elife.98169), 2024-08-07
Supplement: fig3-data1 [file Figure3-E.xlsx]

## Sheet: Sheet1
risk	OR
Low_risk	1
High_risk	11.59
