# Supplementary material for: Derivation and internal validation of prediction models for pulmonary hypertension risk assessment in a cohort inhabiting Tibet, China
Source: eLife journal article supplement (doi:10.7554/elife.98169), 2024-08-07
Supplement: fig3-data1 [file Figure3-F.xlsx]

## Sheet: PH2_VAD
	Tibetan	Gender	Age	RAD	CR	CCR	HVRV	IRBBB	CRBBB	AF	SA	ST	SB	TC	STC	APB	JPB	VPB	PP	CLBBB	IAB	PH	PH2	Set	points	risk
1	0	0	15	0	0	0	0	0	0	0	0	0	0	1	0	0	0	0	0	0	0	0	0	0	25.2318	0
2	0	1	15	1	1	0	1	0	0	0	0	0	0	0	0	0	0	0	0	0	0	1	0	0	40.9322	0
3	1	0	15	0	0	0	0	0	0	0	0	0	0	0	0	0	0	0	0	0	0	0	0	0	27.2218	0
4	1	0	15	0	0	1	0	0	0	0	0	0	0	0	0	0	0	0	0	0	0	1	0	0	27.2218	0
5	1	1	16	0	0	0	0	0	0	0	0	1	0	0	0	0	0	0	1	0	0	1	1	0	96.3824	1
6	1	0	16	0	0	1	0	0	0	0	0	0	0	0	0	0	0	0	0	0	0	0	0	0	28.3329	0
7	1	1	16	0	0	0	0	0	0	0	0	0	0	0	1	0	0	0	0	0	0	0	0	0	28.3329	0
8	1	1	16	0	0	0	0	0	0	0	1	0	0	0	0	0	0	0	0	0	0	0	0	0	28.3329	0
9	0	0	17	1	0	0	0	0	0	0	0	0	0	0	0	0	0	0	0	0	0	0	0	0	29.0016	0
10	0	1	17	0	0	0	0	0	0	0	0	0	0	0	0	0	0	0	0	0	0	0	0	0	7.77778	0
11	0	1	17	0	0	0	0	0	0	0	0	0	0	0	0	0	0	0	0	0	0	1	0	0	7.77778	0
12	0	1	17	0	0	1	0	0	0	0	0	0	0	0	0	0	0	0	0	0	0	0	0	0	7.77778	0
13	0	1	17	0	0	0	0	0	0	0	0	0	0	0	0	0	0	0	0	0	0	0	0	0	7.77778	0
14	1	0	17	0	0	0	0	0	0	0	1	0	0	0	0	0	0	0	0	0	0	0	0	0	29.444	0
15	1	0	17	0	0	0	0	0	0	0	0	1	0	0	0	0	0	0	0	0	0	1	0	0	60.553	0
16	1	1	18	0	0	0	0	0	1	0	1	0	0	0	0	0	0	0	0	0	0	1	0	0	30.5551	0
17	0	1	18	1	1	0	1	0	0	0	0	0	0	0	0	0	0	0	0	0	0	0	0	0	44.2656	0
18	0	1	18	1	1	0	0	0	0	0	0	0	0	0	0	0	0	0	0	0	0	0	0	0	30.1127	0
19	0	0	18	0	0	0	0	0	0	0	0	0	0	0	0	0	0	0	0	0	0	0	0	0	8.88889	0
20	1	0	18	0	0	0	0	0	0	0	0	1	0	0	1	0	0	0	0	0	0	0	0	0	61.6641	0
21	1	1	18	0	0	0	0	0	0	0	0	0	0	0	0	0	0	0	0	0	0	0	0	0	30.5551	0
22	0	1	19	1	1	0	1	0	0	0	1	0	0	0	0	0	0	0	0	0	0	0	0	0	45.3767	0
23	1	0	19	0	0	0	0	0	0	0	0	0	0	0	0	0	0	0	0	0	0	0	0	0	31.6662	0
24	0	1	19	0	0	1	0	1	1	0	0	0	0	0	0	0	0	0	0	0	0	0	0	0	48.1729	0
25	0	0	19	0	0	0	0	0	0	0	0	0	0	0	0	0	0	0	0	0	0	0	0	0	10	0
26	0	1	19	0	1	0	0	0	0	0	1	0	0	0	0	0	0	0	0	0	0	0	0	0	10	0
27	0	1	19	1	1	0	1	0	1	0	0	0	0	0	0	0	0	0	0	0	0	0	0	0	45.3767	0
28	0	0	19	0	1	0	0	0	0	0	0	0	0	0	0	0	0	0	0	0	0	0	0	0	10	0
29	0	1	19	1	1	0	1	0	0	0	1	0	0	0	0	0	0	0	0	0	0	0	0	0	45.3767	0
30	0	1	19	0	0	0	0	0	0	0	0	0	0	0	0	0	0	0	0	0	0	1	0	0	10	0
31	0	1	19	0	0	0	0	0	0	0	0	0	0	0	0	0	0	0	0	0	0	0	0	0	10	0
32	0	1	19	0	0	0	0	0	0	0	1	0	0	0	0	0	0	0	0	0	0	1	0	0	10	0
33	0	1	19	0	0	0	0	0	0	0	0	0	0	0	0	0	0	0	0	0	0	0	0	0	10	0
34	0	1	19	1	0	0	0	0	0	0	0	0	0	0	0	0	0	0	0	0	0	0	0	0	31.2238	0
35	0	1	19	0	0	0	0	0	0	0	1	0	0	0	0	0	0	0	0	0	0	0	0	0	10	0
36	1	0	19	0	0	0	0	0	0	0	0	0	0	0	0	0	0	0	0	0	0	1	1	0	31.6662	0
37	1	1	19	0	0	0	0	0	0	0	0	0	0	0	0	0	0	0	0	0	0	0	0	0	31.6662	0
38	1	1	19	0	0	0	0	0	0	0	0	0	0	0	0	0	0	0	0	0	0	0	0	0	31.6662	0
39	0	1	20	0	0	0	0	0	0	0	0	0	0	0	0	0	0	0	0	0	0	0	0	0	11.1111	0
40	0	1	20	0	0	0	0	0	0	0	0	0	0	0	0	0	0	0	0	0	0	0	0	0	11.1111	0
41	0	1	20	0	0	1	0	0	0	0	0	0	0	0	0	0	0	0	0	0	0	0	0	0	11.1111	0
42	1	1	20	1	0	0	0	0	0	0	0	0	0	0	0	0	0	0	0	0	0	0	0	0	54.0011	0
43	0	1	20	0	0	0	0	0	0	0	0	1	0	0	0	0	0	0	0	0	0	0	0	0	42.2201	0
44	1	1	20	0	0	0	0	0	0	0	0	0	0	1	0	0	0	0	0	0	0	0	0	0	52.4536	0
45	0	1	20	0	0	1	0	0	0	0	0	0	0	0	0	0	0	0	0	0	0	1	0	0	11.1111	0
46	1	0	20	0	0	0	0	0	0	0	0	0	1	0	0	0	0	0	0	0	0	1	1	0	32.7773	0
47	0	0	20	1	1	0	1	0	0	0	0	0	0	0	0	0	0	0	0	0	0	0	0	0	46.4878	0
48	0	1	20	0	0	0	0	0	0	0	1	0	0	0	0	0	0	0	0	0	0	0	0	0	11.1111	0
49	0	0	20	0	1	0	0	0	0	0	1	0	0	0	0	0	0	0	0	0	0	0	0	0	11.1111	0
50	1	1	20	1	1	0	0	0	0	0	0	1	0	0	0	0	0	0	0	0	0	0	0	0	85.1101	1
51	0	1	20	1	1	0	1	0	0	0	0	0	0	0	0	0	0	0	0	0	0	0	0	0	46.4878	0
52	0	1	20	1	1	0	1	0	0	0	0	0	0	0	0	0	0	0	0	0	0	0	0	0	46.4878	0
53	0	1	20	1	1	0	0	0	0	0	0	0	0	0	1	0	0	0	0	0	0	0	0	0	32.3349	0
54	0	1	20	0	0	1	0	0	0	0	0	0	0	0	0	0	0	0	0	0	0	0	0	0	11.1111	0
55	0	1	20	0	0	0	0	0	0	0	0	0	0	0	1	0	0	0	0	0	0	1	0	0	11.1111	0
56	0	0	20	0	0	0	0	0	0	0	0	0	0	0	0	0	0	0	0	0	0	0	0	0	11.1111	0
57	0	1	20	0	0	0	0	0	0	0	0	0	0	0	0	0	0	0	0	0	0	0	0	0	11.1111	0
58	0	1	20	0	0	0	1	0	0	0	0	0	0	0	0	0	0	0	0	0	0	0	0	0	25.264	0
59	0	1	20	0	0	0	0	0	0	0	0	0	0	0	0	0	0	0	0	0	0	0	0	0	11.1111	0
60	0	1	20	0	0	0	0	0	0	0	0	0	0	0	0	0	0	0	0	0	0	0	0	0	11.1111	0
61	0	1	20	0	0	0	0	0	0	0	0	0	0	0	0	0	0	0	0	0	0	0	0	0	11.1111	0
62	0	1	20	0	0	0	0	0	0	0	0	0	1	0	0	0	0	0	0	0	0	0	0	0	11.1111	0
63	0	1	20	0	0	0	0	0	0	0	0	0	0	0	0	0	0	0	0	0	0	0	0	0	11.1111	0
64	0	0	20	0	0	0	0	0	0	0	0	0	0	0	0	0	0	0	0	0	0	0	0	0	11.1111	0
65	0	1	20	0	0	0	0	0	0	0	0	0	0	0	0	0	0	0	0	0	0	0	0	0	11.1111	0
66	0	1	20	0	0	0	0	0	0	0	0	0	0	0	0	0	0	0	0	0	0	0	0	0	11.1111	0
67	0	1	20	0	0	0	0	0	0	0	0	0	0	0	0	0	0	0	0	0	0	0	0	0	11.1111	0
68	0	0	20	1	0	0	0	0	0	0	0	0	0	0	0	0	0	0	0	0	0	1	0	0	32.3349	0
69	0	0	20	0	0	0	0	0	0	0	0	1	0	0	0	0	0	0	0	0	0	0	0	0	42.2201	0
70	0	1	20	1	0	0	0	0	0	0	1	0	0	0	0	0	0	0	0	0	0	1	0	0	32.3349	0
71	0	1	20	1	1	0	1	0	0	0	0	0	0	0	0	0	0	0	0	0	0	0	0	0	46.4878	0
72	1	0	20	0	0	0	0	0	0	0	0	0	0	1	0	0	0	0	0	0	0	0	0	0	52.4536	0
73	1	0	20	0	0	1	0	0	0	0	0	1	0	0	0	0	0	0	0	0	0	1	1	0	63.8864	0
74	1	1	20	1	0	0	0	0	0	0	0	0	0	0	0	0	0	0	0	0	0	1	0	0	54.0011	0
75	0	0	21	0	0	0	0	0	0	0	1	0	0	0	0	0	0	0	0	0	0	0	0	0	12.2222	0
76	0	1	21	1	1	0	1	0	0	0	0	0	0	0	0	0	0	0	0	0	0	0	0	0	47.5989	0
77	0	1	21	0	0	0	0	0	0	0	0	0	1	0	0	0	0	0	0	0	0	0	0	0	12.2222	0
78	0	0	21	0	0	0	0	0	0	0	0	0	0	0	0	0	0	0	0	0	0	0	0	0	12.2222	0
79	0	1	21	0	0	0	0	0	0	0	0	0	0	0	0	0	0	0	0	0	0	1	0	0	12.2222	0
80	1	1	21	0	0	0	0	0	0	0	0	1	0	1	0	0	0	0	0	0	0	1	0	0	84.6737	1
81	0	1	21	0	0	0	0	0	0	0	0	0	0	0	0	0	0	0	0	0	0	0	0	0	12.2222	0
82	0	1	21	1	0	0	0	0	0	0	0	0	0	0	0	0	0	0	0	0	0	0	0	0	33.446	0
83	1	1	21	0	0	0	0	0	0	0	0	0	0	0	0	0	0	0	0	0	0	0	0	0	33.8884	0
84	0	1	21	1	0	0	0	0	0	0	0	1	0	0	0	0	0	0	0	0	0	0	0	0	64.555	0
85	1	1	21	1	1	0	0	0	0	0	1	0	0	0	0	0	0	0	0	0	0	0	0	0	55.1122	0
86	0	1	21	1	1	0	1	0	0	0	0	0	0	0	0	0	0	0	0	0	0	1	0	0	47.5989	0
87	0	1	21	0	0	0	0	0	0	0	1	0	0	0	0	0	0	0	0	0	0	0	0	0	12.2222	0
88	0	1	21	1	1	0	1	0	0	0	0	0	0	0	0	0	0	0	0	0	0	0	0	0	47.5989	0
89	0	0	21	0	0	0	0	0	0	0	0	0	0	0	0	0	0	0	0	0	0	0	0	0	12.2222	0
90	0	0	21	0	0	0	0	0	0	0	0	0	0	0	0	0	0	0	0	0	0	0	0	0	12.2222	0
91	0	1	21	1	1	0	1	0	0	0	0	0	0	0	0	0	0	0	0	0	0	0	0	0	47.5989	0
92	0	1	21	0	0	1	0	0	0	0	0	0	0	0	0	0	0	0	0	0	0	0	0	0	12.2222	0
93	0	1	21	0	1	0	0	0	0	0	0	0	0	0	0	0	0	0	0	0	0	0	0	0	12.2222	0
94	0	1	21	0	0	0	0	0	0	0	0	0	1	0	0	0	0	0	0	0	0	0	0	0	12.2222	0
95	0	1	21	1	0	0	0	0	0	0	1	0	0	0	0	0	0	0	0	0	0	0	0	0	33.446	0
96	0	1	21	0	0	0	0	0	0	0	0	0	1	1	0	0	0	0	0	0	0	0	0	0	31.8985	0
97	0	1	21	0	0	0	0	0	0	0	0	1	0	0	0	0	0	0	0	0	0	0	0	0	43.3313	0
98	0	1	21	0	1	0	0	0	0	0	0	0	0	1	0	0	0	0	0	0	0	1	0	0	31.8985	0
99	0	1	21	0	0	0	0	0	0	0	0	0	0	0	0	0	0	0	0	0	0	0	0	0	12.2222	0
100	0	1	21	1	0	0	0	0	0	0	0	0	0	0	0	0	0	0	0	0	0	1	0	0	33.446	0
101	0	1	21	0	1	0	0	0	0	0	0	0	1	0	0	0	0	0	0	0	0	0	0	0	12.2222	0
102	0	1	21	1	0	0	0	0	0	0	1	0	0	0	0	0	0	0	0	0	0	1	0	0	33.446	0
103	0	1	21	1	1	0	1	0	0	0	0	0	0	0	0	0	0	0	0	0	0	0	0	0	47.5989	0
104	0	1	21	1	1	0	1	0	0	0	1	0	0	0	0	0	0	0	0	0	0	0	0	0	47.5989	0
105	0	1	21	0	0	0	0	0	0	0	1	0	0	1	0	0	0	0	0	0	0	1	0	0	31.8985	0
106	0	1	21	0	0	0	0	0	0	0	1	0	0	0	1	0	0	0	0	0	0	0	0	0	12.2222	0
107	0	1	21	0	0	0	0	0	0	0	0	0	0	0	0	0	0	0	0	0	0	0	0	0	12.2222	0
108	0	1	21	0	0	0	0	0	0	0	0	0	0	0	0	0	0	0	0	0	0	0	0	0	12.2222	0
109	0	1	21	0	0	0	0	0	0	0	0	0	0	0	0	0	0	0	0	0	0	0	0	0	12.2222	0
110	0	1	21	0	0	0	0	0	0	0	0	0	0	0	0	0	0	0	0	0	0	0	0	0	12.2222	0
111	0	1	21	0	0	0	0	0	0	0	0	0	1	0	0	0	0	0	0	0	0	0	0	0	12.2222	0
112	0	0	21	0	0	1	0	0	0	0	1	0	0	0	0	0	0	0	0	0	0	0	0	0	12.2222	0
113	0	1	21	0	0	0	0	0	0	0	1	0	0	0	0	0	0	0	0	0	0	1	0	0	12.2222	0
114	0	0	21	0	0	0	0	0	0	0	1	0	0	0	0	0	0	0	0	0	0	0	0	0	12.2222	0
115	0	1	21	0	0	0	0	0	0	0	0	0	0	0	0	0	0	0	0	0	0	0	0	0	12.2222	0
116	0	0	21	0	0	0	0	0	0	0	1	0	0	0	0	0	0	0	0	0	0	0	0	0	12.2222	0
117	0	1	21	0	0	0	0	0	0	0	0	0	0	0	0	0	0	0	0	0	0	0	0	0	12.2222	0
118	0	1	21	0	1	0	0	0	0	0	0	0	0	0	0	0	0	0	0	0	0	0	0	0	12.2222	0
119	1	1	21	1	0	0	0	0	0	0	0	0	0	0	0	0	0	0	0	0	0	0	0	0	55.1122	0
120	1	1	21	0	0	0	0	0	0	0	0	0	0	1	0	0	0	0	0	0	1	0	0	0	53.5647	0
121	1	1	21	1	1	0	0	0	0	0	0	0	1	0	0	0	0	0	0	0	0	1	0	0	55.1122	0
122	1	0	21	0	0	1	0	1	1	0	0	0	0	0	0	0	0	0	0	0	0	1	1	0	72.0614	0
123	1	0	21	0	0	0	0	0	0	0	0	0	0	0	0	0	0	0	0	0	0	1	0	0	33.8884	0
124	1	1	21	0	0	0	0	0	0	0	0	0	0	0	0	0	0	0	0	0	0	1	0	0	33.8884	0
125	0	1	22	1	1	0	1	0	0	0	0	0	0	0	0	0	0	0	0	0	0	0	0	0	48.71	0
126	0	1	22	1	0	0	0	0	0	0	0	0	0	0	0	0	0	0	0	0	0	0	0	0	34.5571	0
127	0	1	22	0	0	0	0	0	0	0	0	0	0	0	0	0	0	0	0	0	0	0	0	0	13.3333	0
128	0	1	22	1	0	0	0	0	0	0	0	0	0	0	0	0	0	0	0	0	0	0	0	0	34.5571	0
129	1	1	22	0	0	1	0	0	0	0	0	0	0	0	0	0	0	0	0	0	0	1	0	0	34.9995	0
130	0	0	22	0	0	0	0	0	0	0	0	0	0	0	0	0	0	0	0	0	0	0	0	0	13.3333	0
131	1	1	22	0	0	0	0	0	0	0	0	0	0	0	0	0	0	0	0	0	0	0	0	0	34.9995	0
132	0	1	22	0	1	0	0	0	0	0	0	0	0	1	0	0	0	0	0	0	0	1	0	0	33.0096	0
133	0	1	22	1	1	0	1	0	0	0	0	0	0	1	0	0	0	0	0	0	0	1	0	0	68.3862	0
134	0	1	22	0	0	0	0	0	0	0	0	0	1	0	0	0	0	0	0	0	0	0	0	0	13.3333	0
135	0	1	22	1	1	0	1	0	0	0	0	0	1	0	0	0	0	0	0	0	0	0	0	0	48.71	0
136	0	1	22	0	0	0	0	0	0	0	0	0	0	0	0	0	0	0	0	0	0	0	0	0	13.3333	0
137	0	1	22	0	0	0	0	0	0	0	0	0	0	0	0	0	0	0	0	0	0	0	0	0	13.3333	0
138	0	1	22	1	0	0	0	0	0	0	0	0	0	0	0	0	0	0	0	0	0	0	0	0	34.5571	0
139	0	0	22	0	0	0	0	0	0	0	0	0	0	0	0	0	0	0	0	0	0	0	0	0	13.3333	0
140	0	1	22	0	0	0	0	0	0	0	0	0	0	0	0	0	0	0	0	0	0	0	0	0	13.3333	0
141	0	1	22	0	0	0	0	0	0	0	1	0	0	0	0	0	0	0	0	0	0	0	0	0	13.3333	0
142	0	1	22	1	1	0	1	0	0	0	0	0	0	0	0	0	0	0	0	0	0	0	0	0	48.71	0
143	0	1	22	0	0	0	0	0	0	0	0	0	0	0	1	0	0	0	0	0	0	0	0	0	13.3333	0
144	0	0	22	1	1	0	1	0	0	0	0	0	1	0	0	0	0	0	0	0	0	0	0	0	48.71	0
145	0	1	22	0	0	0	0	0	0	0	0	0	1	0	0	0	0	0	0	0	0	1	0	0	13.3333	0
146	0	1	22	1	1	0	1	0	0	0	0	0	1	0	0	0	0	0	0	0	0	1	0	0	48.71	0
147	0	1	22	0	0	0	0	0	0	0	0	0	0	0	0	0	0	0	0	0	0	0	0	0	13.3333	0
148	0	1	22	0	0	0	0	0	0	0	0	0	1	0	0	0	0	0	0	0	0	0	0	0	13.3333	0
149	0	1	22	1	1	0	1	0	0	0	0	0	1	0	0	0	0	0	0	0	0	1	0	0	48.71	0
150	0	1	22	1	0	0	0	0	0	0	0	0	0	0	0	0	0	0	0	0	0	0	0	0	34.5571	0
151	0	0	22	0	0	1	0	0	0	0	0	0	0	0	0	0	0	0	0	0	0	1	0	0	13.3333	0
152	0	1	22	0	0	0	0	0	0	0	0	0	0	0	1	0	0	0	0	0	0	0	0	0	13.3333	0
153	0	1	22	1	1	0	1	0	0	0	0	0	0	0	0	0	0	0	0	0	0	0	0	0	48.71	0
154	0	0	22	0	0	0	0	0	0	0	0	0	0	0	0	0	0	0	0	0	0	0	0	0	13.3333	0
155	0	1	22	0	0	0	0	0	0	0	1	0	0	0	0	0	0	0	0	0	0	0	0	0	13.3333	0
156	0	1	22	0	0	0	0	0	0	0	0	0	1	0	0	0	0	0	0	0	0	0	0	0	13.3333	0
157	0	0	22	0	0	0	0	0	0	0	0	0	0	0	0	0	0	0	0	0	0	0	0	0	13.3333	0
158	0	1	22	0	0	0	0	0	0	0	0	0	0	0	0	0	0	0	0	0	0	0	0	0	13.3333	0
159	0	1	22	0	0	0	0	0	0	0	0	0	0	0	0	0	0	0	0	0	0	0	0	0	13.3333	0
160	0	1	22	0	0	0	0	0	0	0	0	0	0	0	0	0	0	0	0	0	0	0	0	0	13.3333	0
161	0	1	22	0	0	0	0	0	0	0	1	0	0	0	0	0	0	0	0	0	0	0	0	0	13.3333	0
162	0	1	22	0	0	0	0	0	0	0	0	0	0	0	0	0	0	0	0	0	0	0	0	0	13.3333	0
163	0	1	22	0	0	0	0	0	0	0	1	0	0	0	0	0	0	0	0	0	0	0	0	0	13.3333	0
164	0	1	22	0	1	0	0	0	0	0	1	0	0	0	0	0	0	0	0	0	0	0	0	0	13.3333	0
165	0	0	22	0	0	0	0	0	0	0	0	0	0	0	0	0	0	0	0	0	0	1	0	0	13.3333	0
166	0	1	22	0	0	0	0	0	0	0	0	0	0	0	0	0	0	0	0	0	0	0	0	0	13.3333	0
167	0	1	22	1	1	0	0	0	0	0	1	0	0	0	0	0	0	0	0	0	0	0	0	0	34.5571	0
168	0	1	22	0	0	0	0	0	0	0	0	0	0	0	0	0	0	0	0	0	0	1	0	0	13.3333	0
169	1	1	22	1	0	0	0	0	0	0	1	0	0	0	0	0	0	0	0	0	0	1	0	0	56.2233	0
170	1	0	22	0	0	0	0	0	0	0	0	1	0	1	0	0	0	0	0	0	0	1	0	0	85.7848	1
171	0	1	23	1	1	0	1	0	0	0	0	0	0	0	0	0	0	0	0	0	0	0	0	0	49.8211	0
172	1	1	23	0	0	0	0	0	0	0	0	0	1	0	0	0	0	0	0	0	0	0	0	0	36.1107	0
173	0	1	23	0	0	0	0	0	0	0	0	0	0	0	0	0	0	0	0	0	0	0	0	0	14.4444	0
174	0	1	23	1	1	0	0	0	0	0	0	0	0	0	0	0	0	0	0	0	0	0	0	0	35.6682	0
175	0	1	23	0	0	0	0	0	0	0	0	0	1	0	0	0	0	0	0	0	0	0	0	0	14.4444	0
176	1	0	23	1	0	0	0	0	0	0	0	1	0	1	0	0	0	0	0	0	0	1	0	0	108.12	1
177	0	1	23	0	0	0	0	1	1	0	0	0	0	0	0	0	0	0	0	0	0	0	0	0	52.6174	0
178	0	1	23	0	0	0	0	0	0	0	0	0	1	0	0	0	0	0	0	0	0	1	0	0	14.4444	0
179	0	1	23	1	1	0	0	0	0	0	0	0	1	1	0	0	0	0	0	0	0	0	0	0	55.3445	0
180	0	1	23	0	0	0	0	0	0	0	0	0	0	0	0	0	0	0	0	0	0	0	0	0	14.4444	0
181	0	1	23	0	0	0	0	0	0	0	0	0	0	0	0	0	0	0	0	0	0	0	0	0	14.4444	0
182	0	1	23	0	0	0	0	1	1	0	1	0	0	0	1	0	0	0	0	0	0	0	0	0	52.6174	0
183	0	1	23	0	1	0	0	0	0	0	0	0	0	0	0	0	0	0	0	0	0	0	0	0	14.4444	0
184	1	1	23	0	0	0	0	0	0	0	0	0	0	0	0	0	0	0	0	0	0	0	0	0	36.1107	0
185	1	1	23	1	1	0	1	0	0	0	0	0	1	0	1	0	0	0	0	0	0	0	0	0	71.4873	0
186	0	1	23	0	0	1	0	0	0	0	0	0	0	0	0	0	0	0	0	0	0	1	0	0	14.4444	0
187	0	1	23	1	1	0	0	0	0	0	0	0	0	0	0	0	0	0	0	0	0	0	0	0	35.6682	0
188	0	1	23	0	0	0	0	0	0	0	0	0	0	0	0	0	0	0	0	0	0	0	0	0	14.4444	0
189	0	1	23	0	0	0	0	0	0	0	0	0	0	0	1	0	0	0	0	0	0	0	0	0	14.4444	0
190	0	1	23	0	1	0	0	0	0	0	0	1	0	0	0	0	0	0	1	0	0	0	0	0	82.494	1
191	0	1	23	1	1	0	1	0	0	0	0	0	0	0	0	0	0	0	0	0	0	0	0	0	49.8211	0
192	0	1	23	0	0	0	0	0	0	0	0	0	1	0	0	0	0	0	0	0	0	0	0	0	14.4444	0
193	0	1	23	1	0	0	0	0	0	0	0	0	0	0	0	0	0	0	0	0	0	0	0	0	35.6682	0
194	0	1	23	1	0	1	0	0	0	0	1	0	0	0	0	0	0	0	0	0	0	1	0	0	35.6682	0
195	0	1	23	0	0	0	0	0	0	0	0	0	0	0	0	0	0	0	0	0	0	1	0	0	14.4444	0
196	0	1	23	0	0	0	0	0	0	0	1	0	0	0	0	0	0	0	0	0	0	1	0	0	14.4444	0
197	0	0	23	1	1	0	1	0	0	0	1	0	0	0	0	0	0	0	0	0	0	1	0	0	49.8211	0
198	0	1	23	1	0	0	0	0	0	0	0	0	0	0	0	0	0	0	0	0	0	0	0	0	35.6682	0
199	0	1	23	1	0	0	0	0	0	0	1	0	0	0	0	0	0	0	0	0	0	0	0	0	35.6682	0
200	0	1	23	1	0	0	0	0	0	0	0	0	0	0	0	0	0	0	0	0	0	0	0	0	35.6682	0
201	0	1	23	0	0	0	0	0	0	0	0	0	0	0	0	0	0	0	0	0	0	0	0	0	14.4444	0
202	0	1	23	0	0	0	0	0	0	0	0	0	0	0	0	0	0	0	0	0	0	0	0	0	14.4444	0
203	0	0	23	0	0	0	0	0	0	0	0	0	0	0	0	0	0	0	0	0	0	0	0	0	14.4444	0
204	0	1	23	0	0	0	0	0	0	0	0	0	0	1	0	0	0	0	0	0	0	0	0	0	34.1207	0
205	0	1	23	0	0	0	0	0	0	0	0	0	0	0	0	0	0	0	0	0	0	1	0	0	14.4444	0
206	0	1	23	0	0	0	0	0	0	0	1	0	0	0	0	0	0	0	0	0	0	0	0	0	14.4444	0
207	0	1	23	0	0	0	0	0	0	0	1	0	0	0	0	0	0	0	0	0	0	0	0	0	14.4444	0
208	0	1	23	0	0	0	0	0	0	0	1	0	0	0	0	0	0	0	0	0	0	0	0	0	14.4444	0
209	0	1	23	0	0	0	0	0	0	0	0	0	0	1	0	0	0	0	0	0	0	0	0	0	34.1207	0
210	0	1	23	0	0	0	0	0	0	0	0	0	0	0	0	0	0	0	0	0	0	0	0	0	14.4444	0
211	0	0	23	0	0	0	0	0	0	0	0	0	1	0	0	0	0	0	0	0	0	0	0	0	14.4444	0
212	0	1	23	0	0	0	0	0	0	0	0	0	0	0	0	0	0	0	0	0	0	0	0	0	14.4444	0
213	0	1	23	0	0	0	0	0	0	0	0	0	0	0	0	0	0	0	0	0	0	0	0	0	14.4444	0
214	1	1	23	0	0	0	0	0	0	0	0	0	0	0	0	0	0	0	0	0	0	0	0	0	36.1107	0
215	1	1	23	1	1	0	1	0	0	0	0	0	0	0	1	0	0	0	0	0	0	0	0	0	71.4873	0
216	1	1	23	1	1	0	1	0	0	0	1	0	0	0	0	0	0	0	0	0	0	0	0	0	71.4873	0
217	1	1	23	0	0	0	0	1	1	0	0	0	0	0	0	0	0	0	0	0	0	1	0	0	74.2836	0
218	1	0	23	0	0	0	0	0	0	0	0	0	0	0	0	0	0	0	0	0	0	1	0	0	36.1107	0
219	1	1	23	0	0	0	0	0	0	0	0	0	0	0	0	0	0	0	0	0	0	0	0	0	36.1107	0
220	0	1	24	1	1	0	1	0	0	0	0	0	0	0	0	0	0	0	0	0	0	1	0	0	50.9322	0
221	0	1	24	0	0	0	0	0	0	0	0	0	0	0	0	0	0	0	0	0	0	0	0	0	15.5556	0
222	0	1	24	0	0	0	1	0	0	0	0	0	0	0	0	0	0	0	0	0	0	0	0	0	29.7084	0
223	0	0	24	0	0	1	0	0	0	0	0	0	0	0	0	0	0	0	0	0	0	0	0	0	15.5556	0
224	0	1	24	0	0	0	0	0	0	0	0	0	0	0	0	0	0	0	0	0	0	1	0	0	15.5556	0
225	0	1	24	1	0	0	0	0	0	0	1	0	0	0	0	0	0	0	0	0	0	0	0	0	36.7793	0
226	0	1	24	0	0	0	0	0	0	0	0	0	0	0	0	0	0	0	0	0	0	0	0	0	15.5556	0
227	0	1	24	1	1	0	1	0	0	0	0	0	0	0	0	0	0	0	0	0	0	0	0	0	50.9322	0
228	0	1	24	0	0	0	0	0	1	0	0	0	0	0	0	0	0	0	0	0	0	0	0	0	15.5556	0
229	0	1	24	0	0	0	0	0	0	0	0	0	0	0	0	0	0	0	0	0	0	0	0	0	15.5556	0
230	0	0	24	0	0	0	0	0	0	0	0	0	0	0	0	0	0	0	0	0	0	0	0	0	15.5556	0
231	0	0	24	0	0	0	0	0	0	0	0	0	0	0	0	0	0	0	0	0	0	0	0	0	15.5556	0
232	0	1	24	0	0	0	0	0	0	0	0	0	0	0	0	0	0	0	0	0	0	0	0	0	15.5556	0
233	0	1	24	0	0	0	0	0	0	0	1	0	0	0	0	0	0	0	0	0	0	0	0	0	15.5556	0
234	0	0	24	0	0	0	0	0	0	0	0	0	0	0	0	0	0	0	0	0	0	0	0	0	15.5556	0
235	0	1	24	0	0	0	0	0	0	0	0	1	0	0	0	0	0	0	0	0	0	0	0	0	46.6646	0
236	1	1	24	0	0	0	0	0	0	0	1	0	0	0	0	0	0	0	0	0	0	0	0	0	37.2218	0
237	0	1	24	1	0	0	0	0	0	0	0	0	0	0	0	0	0	0	0	0	0	0	0	0	36.7793	0
238	0	1	24	1	1	0	1	0	0	0	0	0	0	0	0	0	0	0	0	0	0	0	0	0	50.9322	0
239	0	1	24	1	1	0	0	0	0	0	0	0	0	0	0	0	0	0	0	0	0	0	0	0	36.7793	0
240	0	1	24	0	0	0	0	0	0	0	0	0	0	0	0	0	0	0	0	0	0	0	0	0	15.5556	0
241	0	1	24	0	0	0	0	0	0	0	0	0	0	0	0	0	0	0	0	0	0	1	0	0	15.5556	0
242	0	1	24	0	0	0	0	0	0	0	0	0	0	0	0	0	0	0	0	0	0	0	0	0	15.5556	0
243	0	0	24	0	0	1	0	0	0	0	0	1	0	0	0	0	0	0	0	0	0	1	0	0	46.6646	0
244	0	1	24	1	0	0	0	0	0	0	0	0	0	0	0	0	0	0	1	0	0	0	0	0	73.7198	0
245	0	0	24	0	0	0	0	0	0	0	1	0	0	0	0	0	0	0	0	0	0	0	0	0	15.5556	0
246	0	1	24	1	1	0	1	0	0	0	0	0	0	0	0	0	0	0	0	0	0	1	0	0	50.9322	0
247	0	1	24	0	0	1	0	0	0	0	0	0	0	0	0	0	0	0	0	0	0	0	0	0	15.5556	0
248	0	1	24	0	0	0	0	0	0	0	1	0	0	0	0	0	0	0	0	0	0	1	0	0	15.5556	0
249	0	1	24	1	1	0	1	0	0	0	0	0	0	0	0	0	0	0	0	0	0	0	0	0	50.9322	0
250	0	1	24	1	1	0	0	0	0	0	0	0	0	0	0	0	0	0	0	0	0	0	0	0	36.7793	0
251	0	1	24	0	0	0	0	0	0	0	0	0	0	0	0	0	0	0	0	0	0	0	0	0	15.5556	0
252	0	1	24	0	0	0	0	0	0	0	0	0	1	0	0	0	0	0	0	0	0	0	0	0	15.5556	0
253	0	1	24	0	0	0	0	0	0	0	0	0	0	0	0	0	0	0	0	0	0	1	0	0	15.5556	0
254	0	1	24	0	1	0	0	0	1	0	0	0	0	0	0	0	0	0	0	0	0	0	0	0	15.5556	0
255	0	1	24	0	1	0	0	0	0	0	0	0	0	0	0	0	0	0	0	0	0	0	0	0	15.5556	0
256	0	1	24	0	0	0	0	0	0	0	0	0	1	0	0	0	0	0	0	0	0	0	0	0	15.5556	0
257	0	1	24	0	0	0	0	0	0	0	0	0	0	0	0	0	0	0	0	0	0	0	0	0	15.5556	0
258	0	1	24	0	0	0	0	0	0	0	0	0	0	0	0	0	0	0	0	0	0	0	0	0	15.5556	0
259	0	1	24	0	0	1	0	0	0	0	0	0	0	0	0	0	0	0	0	0	0	1	0	0	15.5556	0
260	0	1	24	0	0	0	0	0	0	0	1	0	0	0	0	0	1	0	0	0	0	1	0	0	15.5556	0
261	0	1	24	0	0	0	0	0	0	0	0	0	0	1	0	0	0	0	0	0	0	0	0	0	35.2318	0
262	0	1	24	1	0	0	0	0	0	0	0	0	0	0	0	0	0	0	0	0	0	0	0	0	36.7793	0
263	0	1	24	1	0	0	0	0	0	0	0	0	0	0	1	0	0	0	0	0	0	0	0	0	36.7793	0
264	0	0	24	0	0	0	0	0	0	0	0	0	0	0	0	0	0	0	0	0	0	0	0	0	15.5556	0
265	0	1	24	0	0	0	0	0	0	0	0	0	0	0	0	0	0	0	0	0	0	0	0	0	15.5556	0
266	0	1	24	0	0	0	0	0	0	0	0	0	0	0	0	0	0	0	0	0	0	0	0	0	15.5556	0
267	0	1	24	0	0	0	0	0	0	0	0	0	0	1	0	0	0	0	0	0	0	0	0	0	35.2318	0
268	0	0	24	0	0	0	0	0	0	0	1	0	0	0	0	0	0	0	0	0	0	0	0	0	15.5556	0
269	0	1	24	0	0	0	0	0	0	0	0	0	1	0	0	0	1	0	0	0	0	0	0	0	15.5556	0
270	0	0	24	0	0	0	0	0	0	0	1	0	0	1	0	0	0	0	0	0	0	1	0	0	35.2318	0
271	0	1	24	0	0	0	0	1	1	0	0	0	0	0	0	0	0	0	0	0	0	0	0	0	53.7285	0
272	0	1	24	0	0	0	0	0	0	0	0	0	0	0	0	0	0	0	0	0	0	0	0	0	15.5556	0
273	0	1	24	0	0	0	0	0	0	0	0	0	0	0	0	0	0	0	0	0	0	0	0	0	15.5556	0
274	0	1	24	0	0	1	0	0	0	0	0	0	0	0	0	0	0	0	0	0	0	0	0	0	15.5556	0
275	0	1	24	0	0	0	0	0	0	0	0	0	0	0	0	0	0	0	0	0	0	0	0	0	15.5556	0
276	0	1	24	1	0	0	1	0	0	0	1	0	0	0	0	0	0	0	0	0	0	1	0	0	50.9322	0
277	0	1	24	0	0	0	0	0	0	0	0	0	0	0	0	0	0	0	0	0	0	0	0	0	15.5556	0
278	0	1	24	0	0	0	0	0	0	0	0	0	1	0	0	0	0	0	0	0	0	0	0	0	15.5556	0
279	0	1	24	1	1	0	1	0	0	0	0	0	0	0	0	0	0	0	0	0	0	1	0	0	50.9322	0
280	1	1	24	1	0	0	0	0	0	0	0	0	0	0	0	0	0	0	0	0	0	0	0	0	58.4456	0
281	1	1	24	0	0	0	0	0	0	0	1	0	0	0	0	0	0	0	0	0	0	1	0	0	37.2218	0
282	1	1	24	1	1	0	0	0	0	0	0	0	1	0	0	0	0	0	0	0	0	0	0	0	58.4456	0
283	1	1	24	0	0	0	0	0	0	0	0	0	0	1	0	0	0	0	0	0	0	1	0	0	56.898	0
284	0	1	25	0	0	0	0	0	0	0	0	0	1	0	0	0	0	0	0	0	0	0	0	0	16.6667	0
285	0	1	25	0	0	0	0	0	0	0	0	0	0	0	0	0	0	0	0	0	0	0	0	0	16.6667	0
286	0	1	25	0	0	0	0	0	0	0	0	0	0	0	1	0	0	0	0	0	0	0	0	0	16.6667	0
287	0	1	25	0	1	0	0	0	0	0	0	0	1	0	0	0	0	0	0	0	0	1	0	0	16.6667	0
288	0	0	25	0	0	0	0	0	0	0	0	0	0	0	0	0	0	0	0	0	0	0	0	0	16.6667	0
289	1	0	25	0	0	0	0	0	0	0	0	0	1	0	0	0	0	0	0	0	0	1	0	0	38.3329	0
290	0	1	25	0	0	0	0	0	1	0	0	0	0	0	0	0	0	0	0	0	0	0	0	0	16.6667	0
291	0	1	25	0	0	0	0	0	0	0	0	0	0	0	0	0	0	0	0	0	0	0	0	0	16.6667	0
292	0	1	25	0	0	0	0	1	1	0	0	0	0	0	0	0	0	0	0	0	0	0	0	0	54.8396	0
293	1	1	25	0	0	0	0	0	0	0	0	0	0	0	0	0	0	0	0	0	0	1	0	0	38.3329	0
294	0	1	25	0	0	0	0	0	0	0	0	0	0	1	0	0	0	0	0	0	0	1	0	0	36.3429	0
295	0	1	25	0	0	0	0	0	0	0	1	0	0	0	0	0	0	0	0	0	0	0	0	0	16.6667	0
296	0	1	25	0	0	0	0	0	0	0	0	0	0	1	0	0	0	0	0	0	0	0	0	0	36.3429	0
297	0	1	25	0	0	1	0	0	0	0	0	0	0	0	0	0	0	0	0	0	0	0	0	0	16.6667	0
298	0	1	25	0	0	0	0	0	0	0	0	0	0	0	0	0	0	0	0	0	0	0	0	0	16.6667	0
299	0	1	25	0	0	0	0	0	0	0	1	0	0	0	1	0	0	0	0	0	0	0	0	0	16.6667	0
300	0	1	25	0	0	0	0	0	0	0	0	0	0	0	0	0	0	0	0	0	0	0	0	0	16.6667	0
301	0	1	25	1	1	0	1	0	0	0	0	0	0	0	1	0	0	0	0	0	0	0	0	0	52.0433	0
302	0	1	25	1	0	0	0	0	0	0	0	0	1	0	0	0	0	0	0	0	0	0	0	0	37.8904	0
303	0	0	25	1	1	0	0	0	0	0	1	0	0	0	0	0	0	0	0	0	0	0	0	0	37.8904	0
304	0	1	25	0	0	0	0	0	0	0	0	1	0	0	0	0	0	0	0	0	0	0	0	0	47.7757	0
305	0	1	25	1	1	0	1	0	0	0	0	0	0	1	1	0	0	0	0	0	0	1	0	0	71.7196	0
306	0	1	25	1	1	0	0	1	1	0	0	0	1	0	0	0	0	0	0	0	0	0	0	0	76.0634	1
307	0	1	25	0	0	0	0	0	0	0	0	0	0	0	0	0	0	0	0	0	0	1	0	0	16.6667	0
308	0	1	25	0	1	0	0	0	0	0	0	0	0	0	0	0	0	0	0	0	0	0	0	0	16.6667	0
309	0	1	25	1	0	0	0	0	0	0	0	0	0	0	0	0	0	0	0	0	0	1	0	0	37.8904	0
310	0	1	25	1	0	0	0	0	0	0	0	0	0	0	0	0	0	0	0	0	0	1	0	0	37.8904	0
311	0	1	25	1	1	0	1	0	0	0	0	0	0	0	0	0	0	0	0	0	0	0	0	0	52.0433	0
312	0	1	25	1	0	0	0	0	0	0	1	0	0	0	0	0	0	0	0	0	0	1	0	0	37.8904	0
313	0	1	25	0	1	0	0	0	0	0	0	0	0	0	0	0	0	0	0	0	0	0	0	0	16.6667	0
314	0	1	25	1	0	0	0	0	0	0	1	0	0	0	0	0	0	0	0	0	0	0	0	0	37.8904	0
315	0	1	25	1	1	0	1	0	0	0	0	0	0	0	0	0	0	0	0	0	0	1	0	0	52.0433	0
316	0	1	25	0	0	0	0	0	0	0	0	0	0	0	0	0	0	0	0	0	0	0	0	0	16.6667	0
317	0	1	25	0	0	0	0	0	0	0	0	0	0	0	0	0	0	0	0	0	0	0	0	0	16.6667	0
318	0	1	25	0	0	0	0	0	0	0	0	0	0	0	0	0	0	0	0	0	0	1	0	0	16.6667	0
319	0	1	25	0	0	0	0	0	0	0	0	0	0	0	0	0	0	0	0	0	0	0	0	0	16.6667	0
320	0	1	25	0	0	0	0	0	0	0	0	0	0	0	0	0	0	0	0	0	0	0	0	0	16.6667	0
321	0	1	25	0	0	0	0	0	1	0	0	0	0	0	0	0	0	0	0	0	0	0	0	0	16.6667	0
322	0	1	25	0	0	0	0	0	0	0	0	0	0	0	0	0	0	0	0	0	0	0	0	0	16.6667	0
323	0	1	25	0	0	0	0	0	0	0	0	0	0	0	0	0	0	0	0	0	0	0	0	0	16.6667	0
324	0	1	25	0	0	0	0	0	0	0	0	0	0	0	0	0	0	0	0	0	0	0	0	0	16.6667	0
325	0	1	25	0	0	1	0	0	0	0	1	0	0	0	0	0	0	0	0	0	0	0	0	0	16.6667	0
326	0	0	25	0	0	0	0	0	0	0	0	0	0	0	1	0	0	0	0	0	0	0	0	0	16.6667	0
327	0	1	25	0	0	0	0	0	0	0	1	0	0	0	0	0	0	0	0	0	0	1	1	0	16.6667	0
328	0	1	25	1	1	0	1	0	0	0	0	0	1	0	0	0	0	0	0	0	0	0	0	0	52.0433	0
329	0	1	25	0	0	0	0	0	0	0	0	0	0	0	0	0	0	0	0	0	0	0	0	0	16.6667	0
330	0	1	25	0	0	0	0	0	0	0	0	0	0	0	0	0	0	0	0	0	0	0	0	0	16.6667	0
331	0	0	25	0	0	0	0	0	0	0	0	1	0	0	0	0	0	0	0	0	0	0	0	0	47.7757	0
332	0	1	25	1	1	0	0	0	0	0	0	0	0	0	0	0	0	0	0	0	0	0	0	0	37.8904	0
333	0	1	25	1	1	0	1	0	0	0	0	0	0	0	0	0	0	0	0	0	0	0	0	0	52.0433	0
334	0	1	25	0	0	0	1	0	0	0	0	0	0	1	0	0	0	0	0	0	0	1	0	0	50.4958	0
335	0	0	25	0	0	0	0	0	0	0	1	0	0	1	0	0	0	0	0	0	0	0	0	0	36.3429	0
336	0	1	25	0	0	0	0	0	0	0	0	0	0	0	0	0	0	0	0	0	0	0	0	0	16.6667	0
337	1	1	25	0	0	0	0	1	1	0	0	0	0	0	0	0	0	0	0	0	0	0	0	0	76.5058	1
338	1	0	25	0	0	1	0	0	0	0	0	1	0	0	0	0	0	0	0	0	0	0	0	0	69.4419	0
339	1	1	25	0	0	1	0	0	0	0	0	0	1	0	0	0	0	0	0	0	0	0	0	0	38.3329	0
340	1	0	25	0	0	0	0	0	0	0	0	0	0	0	0	0	0	0	0	0	0	0	0	0	38.3329	0
341	0	1	26	1	1	0	1	0	0	0	0	0	0	0	0	0	0	0	0	0	0	0	0	0	53.1545	0
342	0	1	26	0	0	0	0	0	0	0	0	0	0	0	0	0	0	0	0	0	0	1	0	0	17.7778	0
343	0	1	26	0	0	0	0	0	0	0	0	0	1	1	0	0	0	0	0	0	0	0	0	0	37.454	0
344	0	1	26	0	0	0	1	0	0	0	0	0	0	0	0	0	0	0	0	0	0	0	0	0	31.9307	0
345	0	0	26	0	1	0	0	0	0	0	0	0	0	0	0	0	0	0	0	0	0	1	0	0	17.7778	0
346	0	1	26	1	1	0	1	0	0	0	0	0	0	0	0	0	0	0	0	0	0	1	1	0	53.1545	0
347	0	0	26	1	0	0	0	0	0	0	0	0	0	0	0	0	0	0	0	0	0	1	0	0	39.0016	0
348	0	1	26	1	0	0	0	0	0	0	0	0	0	0	0	0	0	0	0	0	0	0	0	0	39.0016	0
349	0	1	26	0	0	0	0	0	0	0	0	0	0	0	0	0	0	0	0	0	0	0	0	0	17.7778	0
350	0	1	26	0	0	0	0	0	0	0	0	0	0	0	0	0	0	0	0	0	0	0	0	0	17.7778	0
351	0	1	26	0	0	0	0	0	0	0	1	0	0	0	0	0	0	0	0	0	0	0	0	0	17.7778	0
352	0	1	26	1	0	0	0	0	0	0	0	0	0	1	0	0	0	0	0	0	0	0	0	0	58.6778	0
353	0	1	26	0	0	0	0	0	0	0	0	0	0	0	0	0	0	0	0	0	0	0	0	0	17.7778	0
354	0	1	26	0	1	0	0	0	0	0	0	0	0	0	0	0	0	0	0	0	0	0	0	0	17.7778	0
355	0	1	26	1	0	0	0	0	0	0	0	0	0	0	0	0	0	0	0	0	0	1	0	0	39.0016	0
356	0	1	26	0	0	0	0	0	0	0	0	0	0	0	0	0	0	0	0	0	0	1	0	0	17.7778	0
357	0	0	26	0	0	0	0	0	0	0	0	0	0	0	0	0	0	0	0	0	0	0	0	0	17.7778	0
358	0	1	26	0	0	0	0	0	0	0	0	0	0	0	0	0	0	0	0	0	0	0	0	0	17.7778	0
359	0	1	26	1	1	0	1	0	0	0	0	0	0	0	0	0	0	0	0	0	0	0	0	0	53.1545	0
360	0	1	26	0	0	0	0	0	0	0	0	0	0	0	0	0	0	0	0	0	0	1	1	0	17.7778	0
361	0	1	26	0	0	0	0	0	0	0	0	0	0	0	0	0	0	0	0	0	0	0	0	0	17.7778	0
362	0	1	26	1	1	0	0	0	0	0	0	0	0	0	0	0	0	0	0	0	0	0	0	0	39.0016	0
363	0	1	26	0	0	1	0	0	0	0	0	0	0	0	0	0	0	0	0	0	0	0	0	0	17.7778	0
364	0	1	26	1	1	0	1	0	0	0	0	0	0	0	0	0	0	0	0	0	0	0	0	0	53.1545	0
365	0	1	26	1	0	0	0	0	0	0	0	0	1	0	0	0	0	0	0	0	0	0	0	0	39.0016	0
366	0	1	26	0	0	0	0	0	0	0	0	0	0	0	0	0	0	0	0	0	0	0	0	0	17.7778	0
367	0	1	26	0	0	0	0	0	0	0	0	0	0	0	0	0	0	0	0	0	0	0	0	0	17.7778	0
368	0	1	26	0	0	0	0	0	0	0	0	0	0	0	0	0	0	0	0	0	0	0	0	0	17.7778	0
369	0	1	26	0	0	0	0	0	0	0	0	0	0	0	0	0	0	0	0	0	0	0	0	0	17.7778	0
370	0	1	26	0	0	0	0	0	0	0	0	0	0	0	0	0	0	0	0	0	0	0	0	0	17.7778	0
371	0	0	26	0	0	0	0	0	0	0	0	0	0	0	0	0	0	0	0	0	0	1	0	0	17.7778	0
372	0	1	26	0	0	0	0	0	0	0	0	1	0	0	0	0	0	0	1	0	0	0	0	0	85.8273	1
373	0	1	26	1	1	0	1	0	0	0	0	0	0	0	0	0	0	0	1	0	0	0	0	0	90.0949	1
374	0	1	26	0	0	0	0	0	0	0	0	0	0	0	0	0	0	0	0	0	0	0	0	0	17.7778	0
375	0	1	26	1	0	0	0	0	0	0	0	0	0	0	0	0	0	0	0	0	0	1	0	0	39.0016	0
376	0	1	26	0	0	0	0	0	0	0	0	0	0	0	0	0	0	0	0	0	0	0	0	0	17.7778	0
377	0	1	26	0	0	0	0	0	0	0	0	1	0	0	0	0	0	0	1	0	0	0	0	0	85.8273	1
378	0	0	26	0	0	0	0	0	0	0	0	0	0	0	0	0	0	0	0	0	0	0	0	0	17.7778	0
379	1	1	26	0	0	0	0	0	0	0	0	0	0	0	0	0	0	0	0	0	0	0	0	0	39.444	0
380	1	1	26	0	0	0	0	0	0	0	0	0	0	0	0	0	0	0	1	0	0	1	0	0	76.3845	1
381	1	1	26	0	0	0	0	0	0	0	0	0	0	0	0	0	0	0	0	0	0	0	0	0	39.444	0
382	1	0	26	0	0	1	0	0	0	0	0	0	0	0	0	0	0	0	0	0	0	0	0	0	39.444	0
383	1	0	26	0	0	0	0	0	0	0	0	0	0	0	0	0	0	0	0	0	0	0	0	0	39.444	0
384	0	1	27	0	0	0	0	0	0	0	0	0	0	1	0	0	0	0	0	0	0	1	0	0	38.5651	0
385	0	1	27	0	0	0	0	0	0	0	0	0	1	0	0	0	0	0	0	0	0	0	0	0	18.8889	0
386	0	0	27	0	0	0	0	0	0	0	0	0	0	1	0	0	0	0	0	0	0	0	0	0	38.5651	0
387	1	0	27	0	0	1	0	0	0	0	0	0	0	0	0	0	0	0	0	0	0	1	0	0	40.5551	0
388	0	1	27	0	0	0	0	0	0	0	0	0	0	1	0	0	0	0	0	0	0	0	0	0	38.5651	0
389	0	1	27	0	0	0	0	0	0	0	0	0	0	0	0	0	0	0	0	0	0	0	0	0	18.8889	0
390	0	1	27	1	0	0	0	0	0	0	0	0	0	0	0	0	0	0	0	0	0	0	0	0	40.1127	0
391	0	1	27	0	0	0	0	0	0	0	0	0	0	0	0	0	0	0	0	0	0	1	0	0	18.8889	0
392	0	1	27	0	0	0	0	0	0	0	0	0	0	0	0	0	0	0	0	0	0	0	0	0	18.8889	0
393	0	1	27	0	0	0	0	0	0	0	0	0	0	0	0	0	0	0	0	0	0	0	0	0	18.8889	0
394	0	1	27	0	0	0	0	0	0	0	1	0	0	0	0	0	0	0	0	0	0	0	0	0	18.8889	0
395	0	1	27	0	0	0	0	0	0	0	0	0	0	0	0	0	0	0	0	0	0	0	0	0	18.8889	0
396	0	1	27	0	0	0	0	0	0	0	0	0	0	0	0	0	0	0	0	0	0	0	0	0	18.8889	0
397	0	1	27	0	0	0	0	0	0	0	0	0	0	0	0	0	0	0	0	0	0	0	0	0	18.8889	0
398	0	1	27	0	0	0	0	0	0	0	0	0	0	0	0	0	0	0	0	0	0	0	0	0	18.8889	0
399	0	1	27	0	0	0	0	0	0	0	1	0	0	0	0	0	0	0	0	0	0	0	0	0	18.8889	0
400	0	1	27	0	0	1	0	0	0	0	1	0	0	0	0	0	0	0	0	0	0	0	0	0	18.8889	0
401	0	1	27	0	0	0	0	0	0	0	0	0	0	0	0	0	0	0	0	0	0	0	0	0	18.8889	0
402	0	1	27	0	0	0	0	0	0	0	0	0	0	0	0	0	0	0	0	0	0	0	0	0	18.8889	0
403	0	1	27	0	0	0	0	0	0	0	0	0	0	0	0	0	0	0	0	0	0	0	0	0	18.8889	0
404	0	1	27	0	0	0	0	0	0	0	0	0	0	0	0	0	0	0	0	0	0	0	0	0	18.8889	0
405	0	1	27	0	0	0	0	0	0	0	0	0	0	0	1	0	0	0	0	0	0	1	0	0	18.8889	0
406	0	1	27	0	0	0	0	0	0	0	0	0	0	0	0	0	0	0	0	0	0	0	0	0	18.8889	0
407	0	1	27	0	0	0	0	0	0	0	0	0	0	0	0	0	0	0	0	0	0	0	0	0	18.8889	0
408	0	1	27	0	0	0	0	0	0	0	0	0	0	0	0	0	0	0	0	0	0	1	0	0	18.8889	0
409	0	1	27	0	0	0	0	0	0	0	0	0	0	0	0	0	0	0	0	0	0	0	0	0	18.8889	0
410	0	1	27	1	0	0	0	0	0	0	0	0	1	0	0	0	0	0	0	0	0	0	0	0	40.1127	0
411	0	1	27	0	0	0	0	0	0	0	0	0	0	0	0	0	0	0	0	0	0	1	0	0	18.8889	0
412	0	1	27	1	0	0	0	0	0	0	0	0	0	0	0	0	0	0	0	0	0	0	0	0	40.1127	0
413	0	1	27	0	0	0	1	0	0	0	0	0	1	0	0	0	0	0	0	0	0	0	0	0	33.0418	0
414	0	1	27	0	0	0	0	0	0	0	1	0	0	0	0	0	0	0	0	0	0	0	0	0	18.8889	0
415	0	1	27	0	0	0	0	0	0	0	0	0	0	0	0	0	0	0	0	0	0	0	0	0	18.8889	0
416	0	1	27	0	0	0	0	0	0	0	0	0	1	0	0	0	0	0	0	0	0	1	0	0	18.8889	0
417	0	1	27	1	1	0	1	0	0	0	0	0	0	0	0	0	0	0	1	0	0	1	0	0	91.2061	1
418	0	1	27	1	0	0	0	0	0	0	0	0	0	0	0	0	0	0	0	0	0	0	0	0	40.1127	0
419	0	1	27	0	0	0	0	0	0	0	0	0	0	0	0	0	0	0	0	0	0	0	0	0	18.8889	0
420	0	1	27	0	0	0	0	0	0	0	0	0	0	0	0	0	0	0	0	0	0	0	0	0	18.8889	0
421	0	1	27	0	0	0	0	0	0	0	0	0	0	0	0	0	0	0	0	0	0	1	0	0	18.8889	0
422	0	1	27	0	0	0	0	0	0	0	0	0	0	0	0	0	0	0	0	0	0	0	0	0	18.8889	0
423	0	1	27	0	0	1	0	0	0	0	0	0	0	0	1	0	0	0	0	0	0	1	0	0	18.8889	0
424	0	1	27	0	0	0	0	0	0	0	0	0	0	0	0	0	0	0	0	0	0	0	0	0	18.8889	0
425	0	1	27	0	0	0	0	0	0	0	0	0	0	0	0	0	0	0	0	0	0	0	0	0	18.8889	0
426	0	1	27	0	0	0	0	0	0	0	0	0	0	0	0	0	0	0	0	0	0	0	0	0	18.8889	0
427	0	1	27	0	0	1	0	0	0	0	0	0	0	0	0	0	0	0	0	0	0	0	0	0	18.8889	0
428	0	1	27	0	0	0	0	0	0	0	0	0	0	0	0	0	0	0	0	0	0	0	0	0	18.8889	0
429	0	1	27	0	0	0	0	0	0	0	1	0	0	0	0	0	0	0	0	0	0	0	0	0	18.8889	0
430	0	1	27	1	1	0	1	0	0	0	0	0	0	0	0	0	0	0	0	0	0	0	0	0	54.2656	0
431	0	1	27	0	0	0	0	0	0	0	0	0	0	0	0	0	0	0	0	0	0	0	0	0	18.8889	0
432	0	1	27	0	0	0	0	0	0	0	0	0	1	0	0	0	0	0	0	0	0	0	0	0	18.8889	0
433	0	1	27	0	0	0	0	1	1	0	0	0	0	0	0	0	0	0	0	0	0	0	0	0	57.0618	0
434	1	1	27	0	0	1	0	0	0	0	1	0	0	0	1	0	0	0	0	0	0	0	0	0	40.5551	0
435	1	1	27	0	0	0	0	0	0	0	0	0	0	0	0	0	0	0	0	0	0	0	0	0	40.5551	0
436	1	1	27	0	0	0	0	0	0	0	0	0	0	1	0	0	0	0	0	0	0	1	0	0	60.2313	0
437	1	0	27	0	0	0	0	0	0	0	0	0	0	0	0	0	0	0	0	0	0	1	0	0	40.5551	0
438	1	1	27	0	0	0	0	0	0	0	1	0	0	0	0	0	0	0	0	0	0	0	0	0	40.5551	0
439	1	0	27	0	0	0	0	0	0	0	0	0	0	0	0	0	0	0	0	0	0	1	1	0	40.5551	0
440	1	0	28	0	0	1	0	0	0	0	0	0	0	0	0	0	0	0	0	0	0	0	0	0	41.6662	0
441	1	0	28	0	0	0	0	0	0	0	0	0	0	0	0	0	0	0	0	0	0	1	0	0	41.6662	0
442	0	1	28	0	0	0	0	0	0	0	1	0	0	0	0	0	0	0	0	0	0	1	0	0	20	0
443	0	1	28	1	1	0	0	0	0	0	0	0	0	0	0	0	0	0	0	0	0	0	0	0	41.2238	0
444	0	0	28	0	1	0	0	0	0	0	0	0	1	0	0	0	0	0	0	0	0	0	0	0	20	0
445	1	0	28	0	0	0	0	0	0	0	0	0	0	0	0	0	0	0	0	0	0	1	0	0	41.6662	0
446	0	1	28	0	0	0	0	0	0	0	0	0	0	0	0	1	0	0	0	0	0	0	0	0	20	0
447	1	1	28	0	0	0	0	0	0	0	0	0	0	0	1	0	0	0	0	0	0	0	0	0	41.6662	0
448	0	1	28	0	0	0	0	0	0	0	0	0	0	0	0	0	0	0	0	0	0	0	0	0	20	0
449	0	1	28	0	0	0	0	0	0	0	0	0	0	0	0	0	0	0	0	0	0	0	0	0	20	0
450	0	1	28	1	1	0	1	0	0	0	0	0	1	0	0	0	0	0	0	0	0	0	0	0	55.3767	0
451	0	1	28	0	0	0	0	0	0	0	1	0	0	0	0	0	0	0	0	0	0	0	0	0	20	0
452	0	1	28	0	0	0	0	0	0	0	0	0	1	0	0	0	0	0	0	0	0	0	0	0	20	0
453	0	1	28	1	0	0	0	0	0	0	0	0	0	0	0	0	0	0	0	0	0	0	0	0	41.2238	0
454	1	1	28	0	0	1	0	0	0	0	0	0	0	0	0	0	0	0	0	0	0	1	0	0	41.6662	0
455	0	1	28	0	0	0	0	0	0	0	0	0	0	0	0	0	0	0	0	0	0	0	0	0	20	0
456	0	1	28	1	1	0	1	0	0	0	0	0	0	0	0	0	0	0	0	0	0	1	0	0	55.3767	0
457	0	1	28	0	0	0	0	0	0	0	1	0	0	1	0	0	0	0	0	0	0	0	0	0	39.6762	0
458	0	1	28	0	0	0	0	0	0	0	0	0	0	0	0	0	0	0	0	0	0	0	0	0	20	0
459	0	1	28	0	0	1	0	0	0	0	0	0	0	0	0	0	0	0	0	0	0	0	0	0	20	0
460	0	0	28	0	0	0	0	0	0	0	0	0	0	0	1	0	0	0	0	0	0	0	0	0	20	0
461	0	0	28	0	0	0	0	0	0	0	0	0	0	0	0	0	0	0	0	0	0	1	0	0	20	0
462	0	1	28	1	1	0	1	0	0	0	0	0	1	0	0	0	0	0	0	0	0	0	0	0	55.3767	0
463	0	1	28	1	0	0	0	0	0	0	0	0	1	0	1	0	0	0	0	0	0	0	0	0	41.2238	0
464	0	1	28	1	1	0	1	0	0	0	0	0	0	0	0	0	0	0	0	0	0	0	0	0	55.3767	0
465	0	1	28	0	0	0	0	0	0	0	0	0	0	0	0	0	0	0	0	0	0	1	0	0	20	0
466	0	1	28	1	0	0	0	0	0	0	0	0	0	1	0	0	0	0	0	0	0	0	0	0	60.9	0
467	0	1	28	1	0	0	0	0	0	0	0	0	0	0	0	0	0	0	0	0	0	0	0	0	41.2238	0
468	0	1	28	1	1	0	0	0	0	0	0	0	0	0	0	0	0	0	0	0	0	0	0	0	41.2238	0
469	0	1	28	0	0	0	0	0	0	0	0	0	1	0	0	0	0	0	0	0	0	0	0	0	20	0
470	0	1	28	0	0	0	0	0	0	0	0	0	0	0	0	0	0	0	0	0	0	0	0	0	20	0
471	0	1	28	0	0	0	0	0	0	0	0	0	0	0	0	0	0	0	0	0	0	0	0	0	20	0
472	0	1	28	0	0	0	0	0	0	0	0	0	0	0	0	0	0	0	0	0	0	0	0	0	20	0
473	0	1	28	0	0	0	0	0	0	0	0	0	0	0	0	0	0	0	0	0	0	0	0	0	20	0
474	0	1	28	0	0	0	0	0	0	0	0	0	1	0	0	0	0	0	0	0	0	0	0	0	20	0
475	0	1	28	0	0	0	0	0	0	0	1	0	0	0	0	0	0	0	0	0	0	0	0	0	20	0
476	0	1	28	0	0	0	0	0	0	0	0	0	0	0	0	0	0	0	0	0	0	0	0	0	20	0
477	0	1	28	0	0	0	0	0	0	0	0	0	0	0	0	0	0	0	0	0	0	0	0	0	20	0
478	0	0	28	1	0	0	0	0	0	0	0	0	0	0	0	0	0	0	0	0	0	1	0	0	41.2238	0
479	0	1	28	1	1	0	1	0	0	0	0	0	0	0	0	0	0	0	0	0	0	0	0	0	55.3767	0
480	0	1	28	0	0	0	0	0	0	0	0	0	0	0	0	0	0	0	0	0	0	0	0	0	20	0
481	0	1	28	1	1	0	1	0	0	0	1	0	0	0	0	0	0	0	0	0	0	0	0	0	55.3767	0
482	0	1	28	1	1	0	1	0	0	0	0	1	0	0	0	0	0	0	0	0	0	0	0	0	86.4857	1
483	0	1	28	1	1	0	0	0	0	0	0	0	0	0	0	0	0	0	0	0	0	1	0	0	41.2238	0
484	0	1	28	0	0	0	0	0	0	0	0	0	0	0	0	0	0	0	0	0	0	1	0	0	20	0
485	0	1	28	0	0	0	1	0	0	0	0	0	0	0	0	0	0	0	0	0	0	1	0	0	34.1529	0
486	1	1	28	0	0	0	0	0	0	0	0	0	0	1	0	0	0	0	0	0	0	0	0	0	61.3424	0
487	1	1	28	0	0	0	0	0	0	0	0	0	0	0	0	0	0	0	0	0	0	0	0	0	41.6662	0
488	1	0	28	0	0	0	0	0	0	0	0	0	0	0	0	0	0	0	0	0	0	0	0	0	41.6662	0
489	1	1	28	0	0	0	0	0	0	0	0	0	0	0	0	0	0	0	0	0	0	1	0	0	41.6662	0
490	1	0	28	0	0	0	0	0	0	0	0	0	0	0	0	0	0	0	0	0	0	0	0	0	41.6662	0
491	1	0	28	0	0	0	0	0	0	0	0	1	0	0	1	0	0	0	0	0	0	0	0	0	72.7752	0
492	0	0	29	0	0	0	0	0	0	0	0	1	0	0	0	0	0	0	1	0	0	1	1	0	89.1606	1
493	0	1	29	0	0	0	0	0	0	0	0	0	0	0	0	0	0	0	0	0	0	0	0	0	21.1111	0
494	0	1	29	0	0	0	0	0	0	0	0	0	0	0	0	0	0	0	0	0	0	0	0	0	21.1111	0
495	1	1	29	0	1	0	0	0	0	0	0	0	0	0	0	0	0	0	0	0	0	1	0	0	42.7773	0
496	0	1	29	0	0	0	0	0	0	0	1	0	0	0	0	0	0	0	0	0	0	0	0	0	21.1111	0
497	0	1	29	1	0	0	0	0	0	0	0	0	0	0	0	0	0	0	0	0	0	0	0	0	42.3349	0
498	1	1	29	0	0	1	0	0	0	0	0	0	0	0	0	0	0	0	0	0	0	0	0	0	42.7773	0
499	0	0	29	0	0	0	0	0	0	0	0	0	0	0	0	0	0	0	0	0	0	0	0	0	21.1111	0
500	0	1	29	0	0	0	0	0	0	0	0	0	1	0	0	0	0	0	0	0	0	1	0	0	21.1111	0
501	0	1	29	1	0	0	0	0	0	0	1	0	0	0	0	0	0	0	0	0	0	0	0	0	42.3349	0
502	0	1	29	0	0	1	0	0	0	0	0	0	0	0	0	0	0	0	0	0	0	0	0	0	21.1111	0
503	0	1	29	0	0	1	0	0	0	0	1	0	0	0	1	0	0	0	0	0	0	0	0	0	21.1111	0
504	0	1	29	0	0	0	0	1	1	0	0	1	0	1	0	0	0	0	0	0	0	1	1	0	110.069	1
505	0	1	29	0	0	0	0	0	0	0	0	0	0	0	0	0	0	0	0	0	0	0	0	0	21.1111	0
506	0	1	29	0	0	0	0	0	0	0	0	0	0	0	0	0	0	0	0	0	0	0	0	0	21.1111	0
507	1	1	29	0	0	0	0	0	0	0	0	0	0	0	0	0	0	0	0	0	0	1	0	0	42.7773	0
508	1	0	29	0	0	0	0	0	0	0	0	0	0	0	0	0	0	0	0	0	0	1	0	0	42.7773	0
509	0	1	29	0	0	0	0	0	0	0	0	0	0	0	0	0	0	0	0	0	0	0	0	0	21.1111	0
510	0	1	29	0	0	0	0	0	0	0	0	0	0	0	0	0	0	0	0	0	0	0	0	0	21.1111	0
511	0	1	29	0	0	0	0	0	0	0	0	0	1	1	0	0	0	0	0	0	0	0	0	0	40.7873	0
512	0	1	29	0	0	0	0	0	0	0	0	0	0	1	0	0	0	0	0	0	0	0	0	0	40.7873	0
513	0	1	29	0	0	0	0	0	0	0	0	1	0	1	0	0	0	0	0	0	0	0	0	0	71.8964	0
514	0	1	29	0	0	0	0	0	0	0	0	0	0	0	0	0	0	0	1	0	0	0	0	0	58.0516	0
515	0	0	29	0	0	0	0	0	0	0	0	0	0	0	0	0	0	0	0	0	0	0	0	0	21.1111	0
516	0	1	29	0	0	0	1	0	0	0	0	0	0	0	0	0	0	0	0	0	0	0	0	0	35.264	0
517	0	1	29	1	0	0	0	0	0	0	0	0	0	0	0	0	0	0	0	0	0	0	0	0	42.3349	0
518	0	1	29	0	0	1	0	0	0	0	1	0	0	0	0	0	0	0	0	0	0	0	0	0	21.1111	0
519	0	1	29	1	1	0	0	0	0	0	0	0	0	0	0	0	0	0	0	0	0	0	0	0	42.3349	0
520	0	1	29	1	0	0	0	0	0	0	1	0	0	0	0	0	0	0	0	0	0	0	0	0	42.3349	0
521	0	1	29	0	0	0	0	0	0	0	0	0	0	0	0	0	0	0	0	0	0	0	0	0	21.1111	0
522	0	1	29	1	0	0	0	0	0	0	0	0	0	0	0	0	0	0	0	0	0	0	0	0	42.3349	0
523	0	1	29	0	0	0	0	0	0	0	0	0	0	0	0	0	0	0	0	0	0	0	0	0	21.1111	0
524	0	1	29	1	0	0	0	0	0	0	1	0	0	0	0	0	0	0	0	0	0	1	0	0	42.3349	0
525	0	1	29	1	0	0	0	0	0	0	0	0	0	0	0	0	0	0	0	0	0	1	0	0	42.3349	0
526	0	1	29	1	0	0	0	0	0	0	1	0	0	0	0	0	0	0	0	0	0	0	0	0	42.3349	0
527	0	1	29	1	0	0	0	0	0	0	1	0	0	0	0	0	0	0	0	0	0	0	0	0	42.3349	0
528	0	1	29	0	1	0	0	0	0	0	1	0	0	0	0	0	0	0	0	0	0	0	0	0	21.1111	0
529	0	1	29	0	0	0	1	0	0	0	0	1	0	0	0	0	0	0	0	0	0	0	0	0	66.373	0
530	0	1	29	0	0	0	0	0	0	0	0	0	0	0	0	0	0	0	0	0	0	1	1	0	21.1111	0
531	0	1	29	0	0	0	0	0	0	0	0	0	0	0	0	0	0	0	0	0	0	0	0	0	21.1111	0
532	0	1	29	0	0	1	0	0	0	0	0	0	0	0	0	0	0	0	0	0	0	0	0	0	21.1111	0
533	0	1	29	0	0	0	0	0	0	0	0	0	0	0	0	0	0	0	0	0	0	0	0	0	21.1111	0
534	0	1	29	0	0	0	0	0	0	0	1	0	0	0	0	0	0	0	0	0	0	0	0	0	21.1111	0
535	0	1	29	0	0	0	0	0	1	0	0	0	0	1	0	0	0	0	0	0	0	0	0	0	40.7873	0
536	0	1	29	0	0	0	0	0	0	0	0	0	0	0	0	0	0	0	0	0	0	0	0	0	21.1111	0
537	0	1	29	0	0	0	0	0	0	0	0	0	0	0	0	0	0	0	0	0	0	0	0	0	21.1111	0
538	0	1	29	0	0	0	0	0	0	0	0	0	0	0	0	0	0	0	0	0	0	0	0	0	21.1111	0
539	0	1	29	0	0	0	0	0	0	0	0	0	0	0	0	0	0	0	0	0	0	0	0	0	21.1111	0
540	0	1	29	0	0	0	0	0	0	0	0	0	0	0	0	0	0	0	0	0	0	0	0	0	21.1111	0
541	0	1	29	0	0	0	0	0	0	0	0	0	0	0	0	0	0	0	0	0	0	0	0	0	21.1111	0
542	0	1	29	0	0	0	0	0	0	0	0	0	0	0	0	0	0	0	0	0	0	0	0	0	21.1111	0
543	0	1	29	0	0	0	0	0	0	0	0	0	0	1	0	0	0	0	0	0	0	0	0	0	40.7873	0
544	1	0	29	0	0	1	0	0	0	0	0	0	0	0	0	0	0	0	0	0	0	1	0	0	42.7773	0
545	1	1	29	0	0	1	0	0	0	0	0	0	0	0	0	0	0	0	0	0	0	1	0	0	42.7773	0
546	1	1	29	0	0	0	0	0	0	0	0	0	0	0	0	0	0	0	0	0	0	0	0	0	42.7773	0
547	1	0	29	0	0	1	0	0	0	0	0	0	0	0	0	0	0	0	0	0	0	0	0	0	42.7773	0
548	1	1	29	1	0	0	0	0	1	0	0	0	0	0	0	0	0	0	0	0	0	0	0	0	64.0011	0
549	1	1	29	0	0	0	0	0	0	0	0	0	0	1	0	0	0	0	0	0	0	0	0	0	62.4536	0
550	1	0	29	0	0	1	0	0	0	0	0	0	1	0	0	0	0	0	0	0	0	0	0	0	42.7773	0
551	1	1	29	0	0	1	0	0	0	0	0	1	0	0	0	0	0	0	0	0	0	1	0	0	73.8864	0
552	1	0	29	1	1	0	1	0	0	0	0	0	0	0	0	0	0	0	0	0	0	1	0	0	78.154	1
553	1	0	29	0	0	0	0	0	0	0	0	0	1	0	0	0	0	0	0	0	0	0	0	0	42.7773	0
554	0	1	30	0	0	0	0	0	0	0	0	0	0	0	1	0	0	0	0	0	1	0	0	0	22.2222	0
555	0	1	30	0	0	0	0	0	0	0	0	0	0	0	0	0	0	0	0	0	0	1	0	0	22.2222	0
556	0	1	30	0	0	0	0	0	0	0	1	0	0	0	0	0	0	0	0	0	0	1	0	0	22.2222	0
557	0	1	30	0	0	0	0	0	0	0	0	0	0	1	0	0	0	0	0	0	0	0	0	0	41.8985	0
558	1	0	30	0	0	0	0	0	0	0	0	0	0	0	0	0	0	0	0	0	0	0	0	0	43.8884	0
559	0	1	30	1	1	0	0	0	0	0	1	0	0	0	0	0	0	1	0	0	0	0	0	0	43.446	0
560	0	1	30	1	0	0	0	0	0	0	0	0	0	0	0	0	0	0	0	0	0	1	0	0	43.446	0
561	0	1	30	0	0	0	0	0	0	0	0	0	0	1	0	0	0	0	0	0	0	1	1	0	41.8985	0
562	0	0	30	0	0	0	0	0	0	0	0	0	0	0	0	0	0	0	0	0	0	1	0	0	22.2222	0
563	0	1	30	0	0	0	0	0	0	0	0	0	0	1	0	0	0	0	0	0	0	0	0	0	41.8985	0
564	1	1	30	0	0	1	0	0	0	0	0	0	0	1	0	0	0	0	0	0	0	0	0	0	63.5647	0
565	0	1	30	0	0	0	0	0	0	0	0	0	0	0	0	0	0	0	0	0	0	0	0	0	22.2222	0
566	1	1	30	0	0	0	0	0	0	0	0	0	0	0	0	0	0	0	0	0	0	1	0	0	43.8884	0
567	0	1	30	0	0	0	0	0	0	0	0	0	0	0	0	0	0	0	0	0	0	0	0	0	22.2222	0
568	0	1	30	0	0	0	0	0	0	0	0	0	0	0	0	0	0	0	0	0	0	0	0	0	22.2222	0
569	1	1	30	0	0	0	0	0	0	0	0	0	0	0	0	0	0	0	0	0	0	0	0	0	43.8884	0
570	0	1	30	0	0	0	0	0	0	0	0	0	0	0	0	0	0	0	0	0	0	0	0	0	22.2222	0
571	0	1	30	1	1	0	1	1	1	0	0	0	0	0	0	0	0	0	0	0	0	0	0	0	95.7718	1
572	0	1	30	0	0	0	0	0	0	0	0	0	0	0	0	0	0	0	0	0	0	0	0	0	22.2222	0
573	0	1	30	0	0	0	0	0	0	0	1	0	0	0	0	0	0	0	0	0	0	0	0	0	22.2222	0
574	0	1	30	1	1	0	1	0	0	0	0	0	0	1	0	0	0	0	0	0	0	0	0	0	77.2751	1
575	0	1	30	1	0	0	0	0	0	0	0	0	0	0	0	0	0	0	0	0	0	1	0	0	43.446	0
576	0	1	30	0	0	0	0	0	0	0	0	0	0	0	0	0	0	0	0	0	0	1	0	0	22.2222	0
577	0	0	30	0	0	1	0	0	0	0	0	0	0	1	0	0	0	0	0	0	0	0	0	0	41.8985	0
578	0	1	30	1	0	0	0	0	0	0	0	0	1	0	0	0	0	0	0	0	0	0	0	0	43.446	0
579	0	1	30	0	1	0	0	0	0	0	0	0	0	0	0	0	0	0	0	0	0	0	0	0	22.2222	0
580	0	1	30	0	0	0	0	0	0	0	0	0	0	0	0	0	0	0	0	0	0	0	0	0	22.2222	0
581	0	1	30	0	0	0	0	0	0	0	0	0	0	0	0	0	0	0	0	0	0	0	0	0	22.2222	0
582	0	0	30	0	0	0	0	0	0	0	0	0	0	1	0	0	0	0	0	0	0	0	0	0	41.8985	0
583	0	1	30	0	0	0	0	0	0	0	0	0	0	0	0	0	0	0	0	0	0	0	0	0	22.2222	0
584	0	1	30	0	0	0	0	0	0	0	0	0	0	0	0	0	0	0	1	0	0	0	0	0	59.1627	0
585	0	1	30	0	0	0	0	0	0	0	0	0	0	0	0	0	0	0	0	0	0	1	0	0	22.2222	0
586	0	1	30	0	0	0	0	0	0	0	1	0	0	0	0	0	0	0	0	0	0	0	0	0	22.2222	0
587	0	1	30	0	0	0	0	0	0	0	0	0	0	0	0	0	0	0	0	0	0	0	0	0	22.2222	0
588	0	1	30	0	0	1	0	0	0	0	0	0	0	0	0	0	0	0	0	0	0	0	0	0	22.2222	0
589	0	1	30	0	0	0	0	0	0	0	1	0	0	0	0	0	0	0	0	0	0	0	0	0	22.2222	0
590	0	0	30	0	0	0	1	0	0	0	0	0	0	0	0	0	0	0	0	0	0	1	1	0	36.3751	0
591	0	1	30	0	0	0	0	0	0	0	0	0	0	0	0	0	0	0	0	0	0	0	0	0	22.2222	0
592	0	1	30	0	0	0	0	0	0	0	0	0	0	0	0	0	0	0	0	0	0	1	1	0	22.2222	0
593	0	1	30	0	0	0	0	0	0	0	0	0	0	0	0	0	0	0	0	0	0	1	0	0	22.2222	0
594	0	1	30	0	0	1	0	0	0	0	0	0	0	0	0	0	0	0	0	0	0	0	0	0	22.2222	0
595	1	1	30	0	0	0	0	0	0	0	0	0	0	0	0	0	0	0	0	0	0	0	0	0	43.8884	0
596	1	1	30	1	1	0	1	0	0	0	0	1	0	0	0	0	0	0	1	0	0	1	1	0	147.315	1
597	1	0	30	0	0	1	0	0	0	0	0	0	1	0	0	0	0	0	0	0	0	0	0	0	43.8884	0
598	1	1	30	0	0	0	0	0	0	0	0	0	0	0	0	0	0	0	0	0	0	0	0	0	43.8884	0
599	0	1	31	1	0	0	0	0	0	0	0	0	0	0	0	0	0	0	0	0	0	0	0	0	44.5571	0
600	0	1	31	0	0	0	0	0	0	0	0	0	0	0	0	0	0	0	0	0	0	1	0	0	23.3333	0
601	0	1	31	0	0	0	0	0	0	0	0	0	0	0	0	0	0	0	0	0	0	1	0	0	23.3333	0
602	0	1	31	0	0	0	0	0	0	0	0	0	0	0	0	0	0	0	0	0	0	0	0	0	23.3333	0
603	0	1	31	0	0	1	0	0	0	0	1	0	0	0	0	0	0	0	0	0	0	0	0	0	23.3333	0
604	0	1	31	0	0	0	0	0	0	0	0	0	1	0	0	0	0	0	0	0	0	0	0	0	23.3333	0
605	1	1	31	0	0	1	0	0	0	0	0	0	0	1	0	0	0	0	0	0	0	1	0	0	64.6758	0
606	0	1	31	0	1	0	0	0	0	0	1	0	0	0	0	0	0	0	0	0	0	0	0	0	23.3333	0
607	0	1	31	1	0	0	0	0	0	0	0	0	0	0	0	0	0	0	0	0	0	0	0	0	44.5571	0
608	0	0	31	0	1	0	0	0	0	0	0	0	0	0	0	0	0	0	0	0	0	1	1	0	23.3333	0
609	0	1	31	0	0	0	0	0	0	0	0	0	0	0	0	0	0	0	0	0	0	0	0	0	23.3333	0
610	0	1	31	0	0	0	0	0	0	0	0	0	0	0	0	0	0	0	0	0	0	1	0	0	23.3333	0
611	0	1	31	0	0	0	0	0	0	0	0	0	0	0	0	0	0	0	0	0	0	0	0	0	23.3333	0
612	1	1	31	0	0	0	0	0	0	0	0	0	0	0	0	0	0	0	0	0	0	0	0	0	44.9995	0
613	0	1	31	1	0	0	0	0	0	0	0	0	0	0	0	0	0	0	0	0	0	1	0	0	44.5571	0
614	0	1	31	0	0	0	0	0	0	0	0	0	0	0	0	0	0	0	0	0	0	1	0	0	23.3333	0
615	0	1	31	1	1	0	1	0	0	0	0	0	0	0	0	0	0	0	0	0	0	0	0	0	58.71	0
616	1	1	31	0	0	0	0	0	0	0	0	0	0	0	0	0	0	0	0	0	0	0	0	0	44.9995	0
617	0	0	31	0	0	0	0	0	0	0	0	0	0	0	0	0	0	0	0	0	0	1	0	0	23.3333	0
618	0	1	31	1	0	0	1	1	1	0	0	0	0	0	0	0	0	0	0	0	0	1	1	0	96.8829	1
619	0	1	31	1	0	0	0	0	0	0	0	0	0	0	0	0	0	0	0	0	0	0	0	0	44.5571	0
620	0	1	31	0	0	0	0	0	0	0	0	0	0	0	0	0	0	0	0	0	0	0	0	0	23.3333	0
621	0	1	31	0	0	0	0	0	0	0	0	0	0	1	0	0	0	0	0	0	0	1	0	0	43.0096	0
622	0	1	31	1	1	0	0	0	0	0	0	0	0	0	0	0	0	0	0	0	0	1	0	0	44.5571	0
623	0	1	31	1	0	0	0	0	0	0	0	0	0	0	0	0	0	0	0	0	0	0	0	0	44.5571	0
624	0	1	31	0	0	0	0	0	0	0	1	0	0	0	0	0	0	0	0	0	0	0	0	0	23.3333	0
625	0	1	31	1	0	0	0	0	0	0	0	0	0	0	0	0	0	0	0	0	0	0	0	0	44.5571	0
626	0	0	31	1	0	0	0	0	0	0	0	0	1	0	0	0	0	0	0	0	0	0	0	0	44.5571	0
627	0	1	31	0	0	1	0	0	0	0	0	0	0	0	0	0	0	0	0	0	0	0	0	0	23.3333	0
628	0	1	31	0	0	0	0	1	1	0	0	0	0	1	0	0	0	0	0	0	0	0	0	0	81.1825	1
629	0	1	31	0	0	1	0	0	0	0	1	0	0	0	0	0	0	0	0	0	0	0	0	0	23.3333	0
630	0	1	31	0	0	0	0	0	0	0	0	0	0	0	0	0	0	1	0	0	0	1	0	0	23.3333	0
631	0	1	31	1	0	0	0	0	0	0	0	1	0	0	0	0	0	0	0	0	0	0	0	0	75.6661	0
632	0	1	31	1	0	0	0	0	0	0	0	0	0	0	0	0	0	0	0	0	0	0	0	0	44.5571	0
633	0	1	31	1	0	0	0	0	0	0	0	0	1	0	1	0	0	0	0	0	0	0	0	0	44.5571	0
634	0	1	31	0	0	0	0	0	0	0	0	0	0	0	0	0	0	0	0	0	0	0	0	0	23.3333	0
635	0	1	31	0	0	0	0	0	0	0	0	0	1	1	0	0	0	0	0	0	0	0	0	0	43.0096	0
636	0	1	31	0	0	0	0	0	0	0	0	0	0	0	0	0	0	0	0	0	0	0	0	0	23.3333	0
637	0	1	31	0	0	0	0	0	0	0	0	0	0	0	0	0	0	0	0	0	0	0	0	0	23.3333	0
638	0	1	31	0	0	0	0	0	0	0	0	0	0	0	0	0	0	0	0	0	0	0	0	0	23.3333	0
639	0	1	31	0	0	0	0	0	0	0	0	0	0	0	0	0	0	0	0	0	0	0	0	0	23.3333	0
640	0	1	31	0	0	0	0	0	0	0	0	0	0	0	0	0	0	0	0	0	0	0	0	0	23.3333	0
641	0	1	31	0	0	0	0	0	0	0	0	0	0	0	0	0	0	0	0	0	0	0	0	0	23.3333	0
642	0	1	31	0	0	0	0	0	0	0	0	0	0	0	0	0	0	0	0	0	0	0	0	0	23.3333	0
643	0	1	31	0	0	0	0	0	0	0	1	0	0	0	0	0	0	0	0	0	0	0	0	0	23.3333	0
644	0	1	31	0	0	0	0	0	0	0	0	0	0	0	0	0	0	0	0	0	0	0	0	0	23.3333	0
645	0	1	31	0	0	0	0	0	0	0	0	0	0	0	0	1	0	0	0	0	0	0	0	0	23.3333	0
646	0	0	31	0	0	0	0	0	0	0	0	0	0	0	0	0	0	0	0	0	0	0	0	0	23.3333	0
647	1	1	31	0	0	1	0	1	1	0	0	0	0	0	0	0	0	0	0	0	0	1	0	0	83.1725	1
648	1	0	31	0	0	0	0	0	0	0	1	0	0	0	0	0	0	0	0	0	0	0	0	0	44.9995	0
649	0	1	32	0	1	0	0	0	0	0	1	0	0	0	0	0	0	0	0	0	0	1	0	0	24.4444	0
650	0	1	32	1	0	0	0	0	0	0	0	0	0	0	0	0	0	1	0	0	0	0	0	0	45.6682	0
651	0	1	32	1	0	0	0	0	0	0	0	0	0	0	0	0	0	0	0	0	0	0	0	0	45.6682	0
652	0	1	32	0	0	0	0	0	0	0	0	0	0	0	0	0	0	0	0	0	0	0	0	0	24.4444	0
653	0	1	32	0	0	0	0	0	0	0	0	0	0	0	0	0	0	0	0	0	0	0	0	0	24.4444	0
654	1	1	32	0	0	1	0	1	1	0	0	0	0	1	0	0	0	0	0	0	0	1	1	0	103.96	1
655	0	1	32	0	0	0	0	0	0	0	0	0	0	0	0	0	0	0	0	0	0	0	0	0	24.4444	0
656	0	1	32	0	0	0	0	0	0	0	0	0	1	0	0	0	0	0	0	0	0	0	0	0	24.4444	0
657	0	1	32	0	0	0	1	0	0	0	0	0	0	0	0	0	0	0	0	0	0	0	0	0	38.5973	0
658	0	1	32	1	1	0	1	0	0	0	1	0	0	0	0	0	0	0	0	0	0	0	0	0	59.8211	0
659	0	1	32	0	0	0	1	0	0	0	0	0	0	0	0	0	0	0	0	0	0	0	0	0	38.5973	0
660	0	1	32	1	1	0	0	0	0	0	0	0	0	0	0	0	0	0	0	0	0	0	0	0	45.6682	0
661	0	0	32	0	0	0	0	0	0	0	0	0	0	0	0	0	0	0	0	0	0	1	0	0	24.4444	0
662	0	1	32	1	0	0	0	0	0	0	0	0	0	0	0	0	0	0	0	0	0	0	0	0	45.6682	0
663	0	1	32	0	0	0	0	0	0	0	0	0	0	0	0	0	0	0	0	0	0	0	0	0	24.4444	0
664	1	0	32	0	0	0	0	0	0	0	0	0	0	0	0	0	0	0	0	0	0	1	0	0	46.1107	0
665	0	1	32	0	0	0	0	0	0	0	0	0	0	0	0	0	0	0	0	0	0	0	0	0	24.4444	0
666	0	1	32	0	0	0	0	0	0	0	0	0	1	0	0	0	0	0	0	0	0	0	0	0	24.4444	0
667	0	1	32	0	0	0	0	0	0	0	0	0	0	0	0	0	0	0	0	0	0	0	0	0	24.4444	0
668	0	1	32	0	0	0	0	0	0	0	0	0	0	0	0	0	0	0	0	0	0	0	0	0	24.4444	0
669	0	1	32	0	0	0	0	0	0	0	0	0	0	0	0	0	0	0	0	0	0	0	0	0	24.4444	0
670	0	0	32	0	0	0	0	0	0	0	0	0	0	1	0	0	0	0	0	0	0	0	0	0	44.1207	0
671	0	1	32	0	0	0	0	0	0	0	0	0	0	0	0	0	0	0	1	0	0	1	0	0	61.3849	0
672	0	1	32	1	1	0	1	0	0	0	1	0	0	1	0	0	0	0	0	0	0	0	0	0	79.4974	1
673	0	1	32	1	1	0	0	0	0	0	0	0	0	0	0	0	0	0	0	0	0	0	0	0	45.6682	0
674	0	1	32	1	0	0	0	0	0	0	0	0	0	0	0	0	0	0	0	0	0	0	0	0	45.6682	0
675	0	1	32	0	1	0	0	0	0	0	0	0	0	0	0	0	0	0	0	0	0	0	0	0	24.4444	0
676	0	1	32	1	0	0	0	0	0	0	0	0	0	0	0	0	0	0	0	0	0	0	0	0	45.6682	0
677	0	1	32	0	0	0	0	0	0	0	0	0	0	0	1	0	0	0	0	0	0	1	1	0	24.4444	0
678	0	1	32	0	0	0	0	0	0	0	0	0	0	0	0	0	0	0	0	0	0	1	1	0	24.4444	0
679	0	1	32	0	0	0	0	0	0	0	0	0	0	0	0	0	0	0	0	0	0	0	0	0	24.4444	0
680	0	1	32	0	0	0	0	0	0	0	0	1	0	0	1	0	0	0	0	0	0	0	0	0	55.5535	0
681	0	1	32	0	0	0	0	0	0	0	0	1	0	0	0	0	0	0	0	0	0	0	0	0	55.5535	0
682	0	1	32	0	0	0	0	0	0	0	0	1	0	0	0	0	0	0	0	0	0	0	0	0	55.5535	0
683	0	1	32	0	0	0	0	0	0	0	0	0	0	0	0	0	0	0	0	0	0	0	0	0	24.4444	0
684	0	1	32	0	0	0	0	0	0	0	0	0	0	0	0	0	0	0	0	0	0	0	0	0	24.4444	0
685	0	1	32	0	0	0	0	0	0	0	0	0	0	0	0	0	0	0	0	0	0	0	0	0	24.4444	0
686	0	1	32	0	0	0	0	0	0	0	0	0	0	0	0	0	0	0	0	0	0	0	0	0	24.4444	0
687	0	1	32	0	0	0	0	0	0	0	0	0	0	0	0	0	0	0	0	0	0	0	0	0	24.4444	0
688	0	1	32	0	0	0	1	0	0	0	0	0	0	0	0	0	0	0	0	0	0	0	0	0	38.5973	0
689	0	1	32	0	0	0	0	0	0	0	0	0	0	0	0	0	0	0	0	0	0	0	0	0	24.4444	0
690	0	1	32	0	0	0	0	0	0	0	0	0	0	0	0	0	0	0	0	0	0	0	0	0	24.4444	0
691	0	1	32	0	0	0	0	0	0	0	0	0	0	0	0	0	0	0	0	0	0	0	0	0	24.4444	0
692	0	0	32	0	0	0	0	0	0	0	0	0	0	0	0	0	0	0	0	0	0	0	0	0	24.4444	0
693	0	1	32	0	0	0	0	0	0	0	0	0	0	0	0	0	0	0	0	0	0	0	0	0	24.4444	0
694	0	1	32	0	0	0	0	0	0	0	0	0	0	0	0	0	0	0	0	0	0	0	0	0	24.4444	0
695	1	1	32	0	0	0	0	0	0	0	1	0	0	0	0	0	0	0	0	0	0	0	0	0	46.1107	0
696	1	1	32	0	0	1	0	0	0	0	0	0	0	0	0	0	0	0	0	0	0	0	0	0	46.1107	0
697	1	0	32	0	0	0	0	0	0	0	0	0	0	0	0	0	0	0	0	0	0	0	0	0	46.1107	0
698	1	1	32	0	0	0	0	0	0	0	0	0	0	0	0	0	0	0	0	0	0	1	0	0	46.1107	0
699	1	1	32	0	0	1	0	0	0	0	0	0	0	0	0	0	0	0	0	0	0	1	0	0	46.1107	0
700	1	0	32	0	0	0	0	0	0	0	0	0	0	0	0	0	0	0	0	0	0	0	0	0	46.1107	0
701	0	1	33	1	1	0	1	0	0	0	0	0	0	0	0	0	0	0	0	0	0	0	0	0	60.9322	0
702	1	0	33	0	0	0	0	0	0	0	0	1	0	0	0	0	1	0	0	0	0	1	1	0	78.3308	1
703	0	1	33	0	1	0	0	0	0	0	0	0	0	0	0	0	0	0	0	0	0	0	0	0	25.5556	0
704	0	1	33	0	0	0	0	0	0	0	0	0	0	0	0	0	0	0	0	0	0	0	0	0	25.5556	0
705	1	0	33	0	0	1	0	0	0	0	0	1	0	1	0	0	0	0	0	0	0	1	0	0	98.007	1
706	1	0	33	0	0	0	0	0	0	0	0	0	0	0	0	0	0	0	0	0	0	0	0	0	47.2218	0
707	0	1	33	0	0	0	0	0	0	0	0	0	0	0	0	0	0	0	0	0	0	0	0	0	25.5556	0
708	0	1	33	0	0	0	0	0	0	0	0	0	0	0	0	0	0	0	0	0	0	0	0	0	25.5556	0
709	0	1	33	0	0	0	0	0	0	0	0	0	1	0	0	0	0	0	0	0	0	1	0	0	25.5556	0
710	0	1	33	0	0	1	0	0	0	0	0	0	0	0	0	0	0	0	0	0	0	1	0	0	25.5556	0
711	1	0	33	0	0	0	0	0	0	0	0	0	0	1	0	0	0	0	0	0	0	1	0	0	66.898	0
712	0	1	33	0	0	0	0	0	0	0	0	0	0	0	0	0	0	0	0	0	0	0	0	0	25.5556	0
713	0	1	33	0	1	0	0	0	0	0	0	0	0	0	0	0	0	0	0	0	0	0	0	0	25.5556	0
714	0	1	33	1	1	0	1	0	0	0	0	0	0	0	0	0	0	0	0	0	0	0	0	0	60.9322	0
715	0	0	33	0	1	0	0	0	0	0	0	0	0	0	0	0	0	0	0	0	0	0	0	0	25.5556	0
716	1	1	33	0	0	0	0	0	0	0	0	0	0	0	0	0	0	0	0	0	0	0	0	0	47.2218	0
717	0	1	33	0	0	0	0	0	0	0	0	0	0	0	0	0	0	0	0	0	0	0	0	0	25.5556	0
718	0	1	33	0	0	0	0	0	0	0	0	0	0	0	0	0	0	0	0	0	0	0	0	0	25.5556	0
719	0	1	33	0	0	0	0	0	0	0	0	0	1	0	1	0	0	0	0	0	0	1	1	0	25.5556	0
720	0	1	33	0	0	0	0	0	0	0	0	0	0	0	0	0	0	0	0	0	0	0	0	0	25.5556	0
721	0	1	33	1	0	0	0	0	0	0	0	0	0	0	0	0	0	0	0	0	0	0	0	0	46.7793	0
722	0	1	33	0	0	0	0	0	0	0	0	0	1	0	0	0	0	0	0	0	0	0	0	0	25.5556	0
723	0	1	33	0	0	0	0	0	0	0	0	0	0	0	0	0	0	0	0	0	0	0	0	0	25.5556	0
724	0	1	33	0	0	0	0	0	0	0	0	0	0	0	0	0	0	0	0	0	0	0	0	0	25.5556	0
725	0	1	33	0	0	0	0	0	0	0	0	0	0	0	0	0	0	0	0	0	0	0	0	0	25.5556	0
726	0	1	33	1	0	0	0	0	0	0	0	0	0	0	0	0	0	0	0	0	0	0	0	0	46.7793	0
727	0	1	33	0	0	1	0	0	0	0	0	0	0	0	0	0	0	0	0	0	0	0	0	0	25.5556	0
728	0	1	33	0	0	0	0	0	0	0	0	0	0	0	0	0	0	0	0	0	0	1	0	0	25.5556	0
729	0	1	33	0	0	0	0	0	0	0	0	0	0	0	0	0	0	0	0	0	0	0	0	0	25.5556	0
730	0	1	33	1	1	0	1	0	0	0	0	0	0	0	0	0	0	0	0	0	0	0	0	0	60.9322	0
731	0	1	33	1	1	0	1	0	0	0	0	0	0	0	0	0	0	0	0	0	0	0	0	0	60.9322	0
732	0	1	33	0	0	0	0	0	0	0	1	0	0	0	0	0	0	0	1	0	0	0	0	0	62.496	0
733	0	1	33	0	0	0	0	0	0	0	0	0	0	0	0	0	0	0	0	0	0	0	0	0	25.5556	0
734	0	1	33	0	0	0	0	0	0	0	0	0	0	0	0	0	0	0	0	0	0	0	0	0	25.5556	0
735	0	1	33	0	0	0	0	0	0	0	0	0	0	0	0	0	0	0	0	0	0	0	0	0	25.5556	0
736	0	1	33	0	0	0	0	0	0	0	0	0	0	0	0	0	0	0	0	0	0	0	0	0	25.5556	0
737	0	1	33	0	0	0	0	0	0	0	0	0	0	0	0	0	0	0	0	0	0	0	0	0	25.5556	0
738	0	1	33	0	0	0	0	0	0	0	1	0	0	0	1	0	0	0	0	0	0	0	0	0	25.5556	0
739	0	1	33	0	0	0	0	0	0	0	0	0	1	0	0	0	0	0	0	0	0	0	0	0	25.5556	0
740	0	1	33	0	0	0	0	0	0	0	0	0	0	0	0	0	0	0	0	0	0	0	0	0	25.5556	0
741	0	1	33	0	0	0	0	0	0	0	0	0	0	0	0	0	0	0	0	0	0	0	0	0	25.5556	0
742	0	1	33	0	0	0	0	0	0	0	1	0	0	0	0	0	0	0	0	0	0	0	0	0	25.5556	0
743	0	1	33	0	0	0	0	0	0	0	0	0	0	0	0	0	0	0	0	0	0	0	0	0	25.5556	0
744	0	1	33	0	0	1	0	0	0	0	0	0	0	1	0	0	0	0	0	0	0	1	0	0	45.2318	0
745	0	1	33	1	1	0	1	0	0	0	0	0	0	0	0	0	0	0	0	0	0	0	0	0	60.9322	0
746	0	1	33	1	0	0	0	0	0	0	0	0	0	0	0	0	0	0	0	0	0	1	0	0	46.7793	0
747	0	1	33	0	0	0	0	0	0	0	0	0	1	0	0	0	0	0	0	0	0	0	0	0	25.5556	0
748	0	1	33	0	0	0	0	0	0	0	0	0	0	0	0	0	0	0	0	0	0	1	0	0	25.5556	0
749	0	1	33	0	0	0	0	0	0	0	0	0	0	0	0	0	0	0	0	0	0	0	0	0	25.5556	0
750	0	1	33	1	0	0	0	0	0	0	0	0	0	0	0	0	0	0	0	0	0	0	0	0	46.7793	0
751	1	1	33	0	0	0	0	0	0	0	0	0	0	0	0	0	0	0	0	0	0	0	0	0	47.2218	0
752	1	1	33	0	0	1	0	0	0	0	0	0	0	0	0	0	0	0	0	0	0	0	0	0	47.2218	0
753	1	0	33	0	0	0	0	0	0	0	0	0	0	0	0	0	0	0	0	0	0	0	0	0	47.2218	0
754	1	1	33	0	0	0	0	0	0	0	0	0	1	0	0	0	0	0	0	0	0	0	0	0	47.2218	0
755	0	0	34	0	0	1	0	0	0	0	0	0	0	0	0	0	0	0	0	0	0	0	0	0	26.6667	0
756	0	1	34	0	0	1	0	0	0	0	0	0	0	0	0	0	0	0	0	0	0	1	0	0	26.6667	0
757	0	1	34	1	1	0	1	0	0	0	0	0	0	0	0	0	0	0	0	0	0	0	0	0	62.0433	0
758	0	1	34	0	0	0	0	0	0	0	0	1	0	0	0	0	0	0	0	0	0	0	0	0	57.7757	0
759	0	1	34	1	1	0	0	0	0	0	0	0	0	0	0	0	0	0	0	0	0	0	0	0	47.8904	0
760	0	1	34	1	0	0	0	0	0	0	0	0	0	0	0	0	0	0	0	0	0	0	0	0	47.8904	0
761	0	1	34	0	0	0	0	0	0	0	0	0	0	0	0	0	0	0	0	0	0	0	0	0	26.6667	0
762	0	1	34	0	0	0	0	0	0	0	0	0	0	0	0	0	0	0	0	0	0	1	1	0	26.6667	0
763	0	1	34	0	0	0	0	0	0	0	0	0	0	0	0	0	0	0	0	0	0	0	0	0	26.6667	0
764	0	1	34	0	0	0	0	0	0	0	0	0	0	0	0	0	0	0	0	0	0	0	0	0	26.6667	0
765	1	0	34	0	0	1	0	0	0	0	0	0	1	0	0	0	0	0	0	0	0	0	0	0	48.3329	0
766	0	1	34	0	0	0	0	0	0	0	0	0	0	0	0	0	0	0	0	0	0	0	0	0	26.6667	0
767	0	1	34	0	0	0	0	0	0	0	0	0	1	0	0	0	0	0	0	0	0	1	0	0	26.6667	0
768	0	1	34	0	0	0	0	0	0	0	0	0	0	0	0	0	0	0	0	0	0	0	0	0	26.6667	0
769	1	0	34	1	1	0	1	0	0	0	0	0	0	0	0	0	0	0	0	0	0	0	0	0	83.7096	1
770	1	0	34	0	0	0	0	0	0	0	0	0	0	1	0	0	0	0	0	0	0	1	0	0	68.0091	0
771	0	1	34	1	1	0	1	0	0	0	0	0	0	0	0	0	0	0	0	0	0	1	0	0	62.0433	0
772	0	1	34	0	0	0	0	0	0	0	0	0	0	0	0	0	0	0	0	0	0	1	0	0	26.6667	0
773	0	1	34	1	0	1	0	0	0	0	0	0	0	0	0	0	0	0	0	0	0	0	0	0	47.8904	0
774	1	1	34	0	0	0	0	0	0	0	0	0	0	0	1	0	0	0	0	0	0	1	0	0	48.3329	0
775	0	1	34	0	0	0	0	0	0	0	0	0	0	0	0	0	0	0	0	0	0	0	0	0	26.6667	0
776	0	1	34	0	0	0	0	0	0	0	0	0	1	0	0	0	0	0	0	0	0	0	0	0	26.6667	0
777	0	1	34	0	0	0	0	0	0	0	1	0	0	0	0	0	0	0	0	0	0	0	0	0	26.6667	0
778	0	1	34	0	0	0	0	0	0	0	0	0	0	0	0	0	0	0	0	0	0	0	0	0	26.6667	0
779	0	1	34	0	0	0	0	0	0	0	0	0	0	0	0	0	0	0	0	0	0	0	0	0	26.6667	0
780	0	1	34	0	0	0	0	0	0	0	0	0	0	0	0	0	0	0	0	0	0	0	0	0	26.6667	0
781	0	1	34	0	0	0	0	0	0	0	0	0	0	0	0	0	0	0	0	0	0	0	0	0	26.6667	0
782	0	1	34	1	1	0	1	0	0	0	0	0	0	0	0	0	0	0	0	0	0	0	0	0	62.0433	0
783	0	0	34	0	0	0	0	0	0	0	0	0	0	0	0	0	0	0	0	0	0	0	0	0	26.6667	0
784	0	1	34	1	0	0	0	0	0	0	0	1	0	0	0	0	0	0	0	0	0	0	0	0	78.9995	1
785	0	0	34	0	0	0	0	0	0	0	0	0	0	0	1	0	0	0	0	0	0	1	0	0	26.6667	0
786	0	1	34	0	0	0	0	0	1	0	0	0	0	0	0	0	0	0	0	0	0	0	0	0	26.6667	0
787	0	1	34	0	0	0	0	0	0	0	0	0	1	0	0	0	0	0	0	0	0	0	0	0	26.6667	0
788	0	0	34	0	0	0	0	0	0	0	0	0	0	1	0	0	0	0	0	0	0	0	0	0	46.3429	0
789	0	1	34	0	0	0	0	0	0	0	0	0	0	0	0	0	0	0	0	0	0	0	0	0	26.6667	0
790	0	1	34	0	0	0	0	0	0	0	0	0	0	0	0	0	0	0	0	0	0	0	0	0	26.6667	0
791	0	1	34	0	0	0	0	0	0	0	1	0	0	0	0	0	0	0	0	0	0	0	0	0	26.6667	0
792	0	0	34	0	0	0	0	0	0	0	1	0	0	0	0	0	0	0	0	0	0	1	0	0	26.6667	0
793	0	1	34	0	0	0	0	0	0	0	1	0	0	0	0	0	0	0	0	0	1	0	0	0	26.6667	0
794	0	1	34	0	0	0	0	0	0	0	0	0	0	0	0	0	0	0	0	0	0	0	0	0	26.6667	0
795	0	1	34	0	0	0	0	0	0	0	0	0	0	0	0	0	0	0	0	0	0	0	0	0	26.6667	0
796	0	1	34	0	0	0	0	0	0	0	0	0	1	0	0	0	0	0	0	0	0	1	0	0	26.6667	0
797	0	1	34	0	0	0	0	0	0	0	0	0	0	0	0	0	0	0	0	0	0	0	0	0	26.6667	0
798	0	1	34	0	0	0	0	0	0	0	1	0	0	0	0	0	0	0	0	0	0	1	0	0	26.6667	0
799	0	1	34	0	0	0	0	0	0	0	0	0	0	1	0	0	0	0	0	0	0	0	0	0	46.3429	0
800	0	1	34	0	0	0	0	0	0	0	0	0	0	0	0	0	0	0	0	0	0	1	0	0	26.6667	0
801	0	1	34	0	0	0	0	0	0	0	0	0	0	0	0	0	0	0	0	0	0	0	0	0	26.6667	0
802	0	1	34	0	0	0	0	0	0	0	0	0	0	0	0	0	0	0	0	0	0	0	0	0	26.6667	0
803	0	1	34	0	0	0	1	0	0	0	0	0	0	0	0	0	0	0	0	0	0	0	0	0	40.8196	0
804	0	1	34	0	0	0	0	0	0	0	0	0	0	0	0	0	0	0	0	0	0	0	0	0	26.6667	0
805	0	1	34	0	0	0	0	0	0	0	0	0	0	0	0	0	0	0	0	0	0	0	0	0	26.6667	0
806	0	1	34	0	0	0	0	0	0	0	0	0	0	0	0	0	0	0	0	0	0	0	0	0	26.6667	0
807	0	0	34	0	0	0	0	0	0	0	0	0	0	0	0	0	0	0	0	0	0	1	0	0	26.6667	0
808	1	1	34	0	0	0	0	0	0	0	0	0	1	0	0	0	0	0	0	0	0	1	0	0	48.3329	0
809	1	1	34	0	0	0	0	0	0	0	0	0	0	0	0	0	0	0	0	0	0	0	0	0	48.3329	0
810	1	1	34	0	0	1	0	0	0	0	0	0	0	0	0	0	0	0	0	0	0	0	0	0	48.3329	0
811	1	1	35	0	0	0	0	0	0	0	0	0	0	0	0	0	0	0	0	0	0	0	0	0	49.444	0
812	1	0	35	0	0	0	0	0	0	0	0	0	0	0	0	0	0	0	0	0	0	0	0	0	49.444	0
813	0	1	35	0	0	0	0	0	0	0	0	0	0	0	0	0	0	0	0	0	0	0	0	0	27.7778	0
814	0	0	35	0	0	0	0	0	0	0	0	0	0	0	0	0	0	1	0	0	0	0	0	0	27.7778	0
815	0	1	35	0	0	0	0	0	0	0	0	0	0	0	0	0	0	0	0	0	0	0	0	0	27.7778	0
816	0	1	35	0	0	0	0	0	0	0	0	0	0	0	0	0	0	0	0	0	0	1	0	0	27.7778	0
817	0	1	35	0	0	0	1	0	0	0	0	0	0	0	0	0	0	0	0	0	0	0	0	0	41.9307	0
818	0	1	35	1	1	0	1	0	0	0	0	0	0	0	0	0	0	0	0	0	0	0	0	0	63.1545	0
819	0	1	35	0	0	0	1	0	0	0	0	0	0	0	0	0	0	0	0	0	0	0	0	0	41.9307	0
820	0	1	35	0	0	0	0	0	0	0	0	0	0	0	0	0	0	0	0	0	0	0	0	0	27.7778	0
821	0	0	35	0	0	0	0	0	0	0	0	0	0	1	0	0	0	0	0	0	0	1	1	0	47.454	0
822	0	1	35	0	0	0	0	0	0	0	0	0	0	0	0	0	0	0	0	0	0	0	0	0	27.7778	0
823	0	1	35	0	0	0	0	0	0	0	0	0	0	0	0	0	0	0	0	0	0	0	0	0	27.7778	0
824	1	1	35	0	0	0	0	0	0	0	0	0	0	0	0	0	0	0	0	0	0	0	0	0	49.444	0
825	0	1	35	0	0	0	0	0	0	0	0	0	0	0	0	0	0	0	1	0	0	1	0	0	64.7183	0
826	0	1	35	0	0	0	0	0	0	0	0	0	0	0	0	0	0	0	0	0	0	1	1	0	27.7778	0
827	0	1	35	0	0	0	0	0	0	0	0	0	0	0	0	0	0	0	0	0	0	0	0	0	27.7778	0
828	0	1	35	0	0	0	0	0	0	0	0	0	0	0	0	0	0	0	0	0	0	1	0	0	27.7778	0
829	0	1	35	0	0	0	0	0	0	0	0	0	0	0	0	0	0	0	0	0	0	1	0	0	27.7778	0
830	0	1	35	0	0	0	0	0	0	0	0	0	0	0	0	0	0	0	0	0	0	0	0	0	27.7778	0
831	0	1	35	1	1	0	1	0	0	0	0	0	0	0	0	0	0	0	0	0	0	1	0	0	63.1545	0
832	0	1	35	0	1	0	0	0	0	0	0	0	0	0	0	0	0	0	0	0	0	0	0	0	27.7778	0
833	0	1	35	0	0	0	0	0	0	0	0	0	0	0	0	0	0	0	0	0	0	0	0	0	27.7778	0
834	0	1	35	1	0	0	0	0	0	0	0	0	0	0	0	0	0	0	0	0	0	0	0	0	49.0016	0
835	0	1	35	0	0	0	0	0	0	0	0	0	0	0	0	0	0	0	0	0	0	0	0	0	27.7778	0
836	0	1	35	0	1	0	0	0	0	0	0	0	0	0	0	0	0	0	0	0	0	0	0	0	27.7778	0
837	0	1	35	0	0	1	0	0	0	0	0	0	0	0	0	0	0	0	0	0	0	0	0	0	27.7778	0
838	0	1	35	1	1	0	0	0	0	0	0	0	0	0	0	0	0	0	0	0	0	0	0	0	49.0016	0
839	0	1	35	0	0	0	0	1	1	0	0	0	0	0	0	0	0	0	0	0	0	1	0	0	65.9507	0
840	0	0	35	0	0	0	0	0	0	0	0	1	0	1	0	0	0	0	0	0	0	0	0	0	78.563	1
841	0	1	35	1	0	0	0	0	0	0	0	0	0	0	0	0	0	0	0	0	0	0	0	0	49.0016	0
842	0	1	35	1	0	0	0	0	0	0	0	0	0	0	0	0	0	0	0	0	0	1	0	0	49.0016	0
843	0	1	35	0	0	0	0	0	0	0	0	0	0	0	0	0	0	0	0	0	0	0	0	0	27.7778	0
844	0	1	35	0	0	0	0	0	0	0	0	0	0	0	0	0	0	0	0	0	0	0	0	0	27.7778	0
845	0	0	35	0	0	1	0	0	0	0	0	0	0	0	0	0	0	0	0	0	0	0	0	0	27.7778	0
846	0	1	35	0	0	0	0	0	0	0	0	0	0	0	0	0	0	0	0	0	0	1	0	0	27.7778	0
847	0	1	35	0	0	0	0	0	0	0	0	0	0	0	0	0	0	0	0	0	0	0	0	0	27.7778	0
848	0	1	35	0	0	0	0	0	0	0	0	0	1	0	0	0	0	0	0	0	0	0	0	0	27.7778	0
849	0	1	35	0	0	0	0	0	0	0	0	0	0	0	0	0	0	0	0	0	0	0	0	0	27.7778	0
850	0	1	35	0	0	0	0	0	0	0	0	0	0	0	0	0	0	0	0	0	0	0	0	0	27.7778	0
851	0	1	35	0	0	0	0	0	0	0	0	1	0	0	0	0	0	0	0	0	0	0	0	0	58.8868	0
852	0	1	35	0	0	0	0	0	0	0	0	0	0	0	0	0	0	0	0	0	0	0	0	0	27.7778	0
853	0	1	35	0	0	0	0	0	0	0	0	0	0	0	0	0	0	0	0	0	0	0	0	0	27.7778	0
854	0	1	35	0	0	0	0	0	0	0	0	0	0	0	0	0	0	0	0	0	0	0	0	0	27.7778	0
855	0	1	35	0	0	0	0	0	0	0	0	0	0	0	0	0	0	0	0	0	0	0	0	0	27.7778	0
856	0	0	35	0	0	0	0	0	0	0	0	0	0	0	0	0	0	0	0	0	0	1	0	0	27.7778	0
857	0	1	35	0	0	0	0	0	0	0	0	1	0	1	0	0	0	0	0	0	0	1	0	0	78.563	1
858	0	0	35	0	0	0	0	0	0	0	0	1	0	0	0	0	0	0	0	0	0	1	1	0	58.8868	0
859	0	1	35	0	0	0	0	0	0	0	1	0	0	0	0	0	0	0	0	0	0	1	0	0	27.7778	0
860	1	1	35	1	1	0	1	0	0	0	0	0	0	0	0	0	0	0	0	0	0	0	0	0	84.8207	1
861	1	0	35	0	0	0	0	0	0	0	0	0	0	0	0	0	0	0	0	0	0	1	1	0	49.444	0
862	1	1	35	0	0	1	0	0	0	0	0	0	0	0	0	0	0	0	0	0	0	1	0	0	49.444	0
863	1	0	35	1	1	0	1	1	1	0	0	1	0	1	0	0	0	0	0	0	0	1	1	0	173.779	1
864	1	0	35	0	0	0	0	0	0	0	1	0	0	0	0	0	0	0	0	0	0	1	0	0	49.444	0
865	1	1	35	0	0	0	0	0	0	0	0	0	1	0	0	0	0	0	0	0	0	0	0	0	49.444	0
866	1	1	35	0	0	0	1	0	0	0	0	0	0	0	0	0	0	0	0	0	0	0	0	0	63.5969	0
867	1	1	35	0	0	0	0	0	0	0	0	0	0	0	0	0	0	0	0	0	0	1	0	0	49.444	0
868	0	1	36	0	0	0	0	0	0	0	0	0	0	0	0	0	0	0	0	0	0	1	0	0	28.8889	0
869	0	1	36	0	0	0	0	0	0	0	0	0	0	0	0	0	0	0	0	0	0	0	0	0	28.8889	0
870	0	1	36	1	1	0	1	0	0	0	0	0	0	0	0	0	0	0	0	0	0	0	0	0	64.2656	0
871	0	1	36	0	0	0	0	0	0	0	0	0	0	0	0	0	0	0	0	0	0	1	1	0	28.8889	0
872	0	1	36	0	0	0	0	0	0	0	0	0	0	0	0	0	0	0	0	0	0	1	0	0	28.8889	0
873	0	1	36	0	1	0	0	0	0	0	0	0	1	0	0	0	0	0	0	0	0	1	0	0	28.8889	0
874	0	1	36	1	1	0	1	0	0	0	1	0	0	0	0	0	0	0	0	0	0	0	0	0	64.2656	0
875	1	1	36	1	0	1	0	0	0	0	0	0	0	0	0	0	0	0	0	0	0	1	1	0	71.7789	0
876	0	1	36	0	0	0	0	0	0	0	0	0	0	0	0	0	0	0	0	0	0	1	0	0	28.8889	0
877	0	1	36	0	0	0	0	0	0	0	0	0	0	0	0	0	0	0	0	0	0	1	0	0	28.8889	0
878	1	1	36	0	0	0	0	0	0	0	0	0	0	0	0	0	0	0	0	0	0	0	0	0	50.5551	0
879	1	0	36	0	0	1	0	0	0	0	1	0	0	0	0	0	0	0	0	0	0	1	0	0	50.5551	0
880	1	1	36	0	0	0	0	0	0	0	0	0	0	0	0	0	0	0	0	0	0	0	0	0	50.5551	0
881	0	1	36	0	0	1	0	0	0	0	0	0	0	0	0	0	0	0	0	0	0	0	0	0	28.8889	0
882	0	1	36	0	0	0	0	0	0	0	1	0	0	0	0	0	0	0	0	0	0	0	0	0	28.8889	0
883	0	1	36	0	0	0	0	0	0	0	0	0	1	0	0	0	0	0	0	0	0	0	0	0	28.8889	0
884	0	1	36	0	0	0	0	1	1	0	0	0	0	0	0	0	0	0	0	0	0	0	0	0	67.0618	0
885	0	1	36	0	0	0	0	0	0	0	1	0	0	0	0	0	0	0	0	0	1	0	0	0	28.8889	0
886	0	1	36	0	0	0	0	0	0	0	0	0	0	0	0	0	0	0	0	0	0	0	0	0	28.8889	0
887	0	1	36	0	0	0	0	0	0	0	0	0	0	0	0	0	0	0	0	0	0	1	0	0	28.8889	0
888	0	1	36	1	0	0	0	0	0	0	0	0	0	0	0	0	0	0	0	0	0	0	0	0	50.1127	0
889	0	1	36	1	1	0	1	0	0	0	0	0	1	0	0	0	0	0	0	0	0	1	0	0	64.2656	0
890	0	1	36	0	0	0	0	0	0	0	0	0	0	0	0	0	0	0	0	0	0	0	0	0	28.8889	0
891	0	0	36	0	0	0	0	0	0	0	0	0	0	0	1	0	0	0	0	0	0	0	0	0	28.8889	0
892	0	1	36	0	0	0	0	0	0	0	1	0	0	0	0	0	0	0	0	0	0	0	0	0	28.8889	0
893	0	1	36	1	1	0	0	0	0	0	0	0	0	1	0	0	0	0	0	0	0	0	0	0	69.7889	0
894	0	1	36	0	1	0	0	0	0	0	0	0	0	0	0	0	0	0	0	0	0	0	0	0	28.8889	0
895	0	1	36	1	0	0	0	0	0	0	0	0	0	1	0	0	0	0	0	0	0	1	0	0	69.7889	0
896	0	1	36	0	0	0	0	0	0	0	0	0	0	0	0	0	0	0	0	0	0	0	0	0	28.8889	0
897	0	1	36	0	0	0	0	0	0	0	0	0	0	0	0	0	0	0	0	0	0	0	0	0	28.8889	0
898	0	1	36	0	0	0	0	0	0	0	0	0	0	0	0	0	0	0	0	0	0	0	0	0	28.8889	0
899	0	1	36	0	0	0	0	0	0	0	0	0	0	0	1	0	0	0	0	0	0	1	0	0	28.8889	0
900	0	0	36	0	0	0	0	0	0	0	0	1	0	0	0	0	0	0	0	0	0	0	0	0	59.9979	0
901	1	0	36	0	0	0	0	0	0	0	0	0	0	0	0	0	0	0	0	0	0	1	0	0	50.5551	0
902	1	0	36	0	0	0	0	0	0	0	0	0	0	0	0	0	0	0	0	0	0	0	0	0	50.5551	0
903	1	1	36	0	0	0	0	0	0	0	0	0	0	0	0	0	0	0	0	0	0	0	0	0	50.5551	0
904	1	0	36	0	0	0	0	0	0	0	0	0	0	0	0	0	0	0	0	0	0	0	0	0	50.5551	0
905	1	1	36	0	0	0	0	0	0	0	0	0	1	0	0	0	0	0	0	0	0	0	0	0	50.5551	0
906	1	0	36	0	0	0	0	0	0	0	0	0	0	0	0	0	0	0	0	0	0	1	0	0	50.5551	0
907	0	1	37	0	0	0	0	0	0	0	0	0	0	0	0	0	0	0	0	0	0	0	0	0	30	0
908	0	1	37	0	1	0	0	0	0	0	0	0	0	1	0	0	0	0	0	0	0	1	0	0	49.6762	0
909	0	1	37	0	0	0	0	0	0	0	0	0	0	0	0	0	0	0	0	0	0	1	0	0	30	0
910	0	0	37	0	0	0	0	0	0	0	0	0	0	1	0	0	0	0	0	0	0	1	0	0	49.6762	0
911	0	1	37	1	1	0	0	0	0	0	1	0	0	0	0	0	0	0	0	0	0	0	0	0	51.2238	0
912	0	1	37	0	0	0	0	0	0	0	0	0	0	0	0	0	0	0	0	0	0	0	0	0	30	0
913	0	1	37	0	0	1	0	0	0	0	0	0	0	1	0	0	0	0	0	0	0	0	0	0	49.6762	0
914	1	1	37	0	0	0	0	0	0	0	0	0	0	0	0	0	0	0	0	0	0	0	0	0	51.6662	0
915	0	1	37	0	0	0	0	0	0	0	0	0	0	0	0	0	0	0	0	0	0	0	0	0	30	0
916	0	1	37	0	0	0	0	0	0	0	0	0	0	0	0	0	0	0	0	0	0	0	0	0	30	0
917	0	1	37	1	1	0	1	0	0	0	0	0	0	0	0	0	0	0	0	0	0	0	0	0	65.3767	0
918	0	0	37	0	0	0	0	0	0	0	0	0	0	1	0	0	0	0	0	0	0	0	0	0	49.6762	0
919	0	1	37	0	0	0	0	0	0	0	0	0	0	0	0	0	0	0	0	0	0	0	0	0	30	0
920	0	1	37	0	0	0	0	0	0	0	0	0	0	0	0	0	0	0	0	0	0	0	0	0	30	0
921	0	1	37	0	0	0	0	0	0	0	0	0	0	0	0	0	0	0	0	0	0	0	0	0	30	0
922	0	1	37	0	0	0	0	0	0	0	0	0	0	0	0	0	0	0	0	0	0	0	0	0	30	0
923	0	0	37	0	0	0	0	0	0	0	0	0	0	0	0	0	0	0	0	0	0	0	0	0	30	0
924	0	1	37	0	0	0	0	0	0	0	0	0	0	0	0	0	0	0	0	0	0	1	0	0	30	0
925	0	1	37	0	0	0	0	0	0	0	0	0	0	0	0	0	0	0	0	0	0	1	0	0	30	0
926	0	1	37	0	0	0	0	0	0	0	0	0	0	0	0	0	0	0	0	0	0	0	0	0	30	0
927	0	1	37	0	0	0	0	0	0	0	0	0	0	1	0	0	0	0	0	0	0	0	0	0	49.6762	0
928	0	1	37	1	1	0	1	0	0	0	0	0	0	0	0	0	0	0	0	0	0	0	0	0	65.3767	0
929	0	1	37	0	0	0	0	0	0	0	0	0	0	0	0	0	0	0	0	0	0	0	0	0	30	0
930	0	1	37	1	1	0	1	0	0	0	0	0	0	0	0	0	0	0	0	0	0	0	0	0	65.3767	0
931	0	0	37	0	0	0	0	0	0	0	0	0	1	1	0	0	0	0	0	0	0	1	0	0	49.6762	0
932	0	1	37	0	0	0	0	0	0	0	0	0	0	0	0	0	0	0	0	0	0	0	0	0	30	0
933	0	1	37	1	1	0	1	0	0	0	0	0	0	0	0	0	0	0	0	0	0	1	0	0	65.3767	0
934	0	0	37	0	0	1	0	0	0	0	0	0	0	0	0	0	0	0	0	0	0	0	0	0	30	0
935	0	1	37	0	0	0	0	0	0	0	0	0	0	1	0	0	0	0	1	0	0	1	0	0	86.6167	1
936	0	1	37	0	0	0	0	0	0	0	0	0	0	0	0	0	0	0	0	0	0	0	0	0	30	0
937	0	0	37	0	0	0	0	0	0	0	0	0	0	1	0	0	0	0	0	0	0	1	0	0	49.6762	0
938	0	1	37	0	0	0	0	0	0	0	0	0	0	1	0	0	0	0	0	0	0	1	0	0	49.6762	0
939	0	1	37	0	0	0	0	0	0	0	0	0	0	0	0	0	0	0	0	0	0	0	0	0	30	0
940	0	1	37	1	1	0	1	0	0	0	0	0	0	0	0	0	0	0	0	0	0	0	0	0	65.3767	0
941	0	1	37	0	0	0	0	0	0	0	0	0	0	0	0	0	0	0	0	0	0	0	0	0	30	0
942	0	1	37	0	0	0	0	0	0	0	0	0	0	0	0	0	0	0	0	0	0	0	0	0	30	0
943	1	1	37	1	1	0	1	0	1	0	1	0	0	0	0	0	0	0	0	0	0	0	0	0	87.0429	1
944	1	0	37	0	0	0	0	0	0	0	0	0	0	1	0	0	0	0	0	0	0	1	0	0	71.3424	0
945	1	1	37	0	0	0	0	0	0	0	0	0	0	0	0	0	0	0	0	0	0	0	0	0	51.6662	0
946	1	1	37	0	0	0	0	0	0	0	0	0	0	0	0	0	0	0	0	0	0	1	0	0	51.6662	0
947	1	1	37	0	0	1	0	0	0	0	0	0	0	0	0	0	0	0	0	0	0	0	0	0	51.6662	0
948	1	1	37	0	1	0	0	0	0	0	0	1	0	0	0	0	0	0	0	0	0	1	1	0	82.7752	1
949	0	0	38	0	0	0	0	0	0	0	0	0	0	0	0	0	0	0	1	0	0	0	0	0	68.0516	0
950	0	1	38	0	0	0	0	0	0	0	0	0	0	0	0	0	0	0	0	0	0	0	0	0	31.1111	0
951	1	1	38	1	1	0	1	0	0	0	0	0	0	0	0	0	0	0	0	0	0	0	0	0	88.154	1
952	0	1	38	0	0	0	0	0	0	0	0	0	0	0	0	0	0	0	0	0	0	0	0	0	31.1111	0
953	0	1	38	0	0	0	0	0	0	0	0	0	0	0	0	0	0	0	0	0	0	1	0	0	31.1111	0
954	0	1	38	0	0	0	0	0	0	0	0	0	0	0	0	0	0	0	0	0	0	1	0	0	31.1111	0
955	0	1	38	0	0	1	0	0	0	0	0	0	0	0	0	0	0	0	0	0	0	1	0	0	31.1111	0
956	0	1	38	0	0	0	0	0	0	0	0	0	0	0	0	0	0	0	0	0	0	0	0	0	31.1111	0
957	1	0	38	0	0	0	0	0	0	0	0	0	0	0	0	0	0	0	0	0	0	1	1	0	52.7773	0
958	0	1	38	1	0	0	0	0	0	0	0	0	0	0	0	0	0	0	0	0	0	0	0	0	52.3349	0
959	0	1	38	0	0	0	0	0	0	0	0	0	0	0	0	0	0	0	0	0	0	0	0	0	31.1111	0
960	0	1	38	0	0	0	0	0	0	0	0	0	0	0	0	0	0	1	0	0	0	1	1	0	31.1111	0
961	0	0	38	0	0	0	0	0	0	0	0	0	0	0	0	0	0	0	0	0	0	0	0	0	31.1111	0
962	0	0	38	0	1	0	0	0	0	0	1	0	0	0	0	0	0	0	0	0	0	1	0	0	31.1111	0
963	0	1	38	0	0	0	0	0	0	0	0	0	0	0	0	0	0	0	0	0	0	0	0	0	31.1111	0
964	0	1	38	0	0	0	0	0	0	0	0	0	0	0	0	0	0	0	0	0	0	0	0	0	31.1111	0
965	0	0	38	0	0	1	0	0	0	0	0	0	0	0	0	0	0	0	0	0	0	1	0	0	31.1111	0
966	0	1	38	0	0	1	1	0	0	0	0	0	0	0	0	0	0	0	0	0	0	0	0	0	45.264	0
967	0	0	38	0	0	0	0	0	0	0	0	0	0	0	0	0	0	0	0	0	0	0	0	0	31.1111	0
968	0	1	38	1	1	0	1	0	0	0	0	1	0	0	0	0	0	0	0	0	0	0	0	0	97.5968	1
969	0	0	38	0	0	1	0	0	0	0	0	0	0	0	0	0	0	0	0	0	0	1	0	0	31.1111	0
970	0	1	38	1	0	0	0	0	0	0	0	0	0	0	0	0	0	0	0	0	0	0	0	0	52.3349	0
971	0	1	38	1	1	0	0	0	0	0	0	1	0	0	0	0	0	0	0	0	0	0	0	0	83.4439	1
972	0	0	38	1	0	0	0	0	0	0	1	0	0	0	0	0	0	0	0	0	0	0	0	0	52.3349	0
973	0	0	38	0	0	0	0	0	0	0	0	0	0	0	0	0	0	0	0	0	0	0	0	0	31.1111	0
974	0	1	38	0	0	0	0	0	0	0	0	0	0	0	0	0	0	0	0	0	0	0	0	0	31.1111	0
975	0	1	38	0	0	0	0	0	0	0	0	0	0	1	0	0	0	0	0	0	0	0	0	0	50.7873	0
976	0	1	38	0	0	0	0	0	0	0	0	0	0	0	0	1	0	0	0	0	0	0	0	0	31.1111	0
977	0	0	38	0	0	0	0	0	0	0	0	0	0	0	0	0	0	0	1	0	0	0	0	0	68.0516	0
978	0	1	38	1	1	0	1	0	0	0	0	0	0	0	0	0	0	0	0	0	0	0	0	0	66.4878	0
979	0	0	38	1	1	0	1	0	0	0	0	0	0	0	0	0	0	0	0	0	0	1	0	0	66.4878	0
980	0	1	38	0	0	0	0	0	0	0	0	0	0	0	0	0	0	0	0	0	0	0	0	0	31.1111	0
981	0	1	38	0	0	0	0	0	0	0	0	0	0	0	0	0	0	0	0	0	0	0	0	0	31.1111	0
982	0	1	38	0	0	0	0	0	0	0	0	0	0	0	0	0	0	0	0	0	0	0	0	0	31.1111	0
983	1	0	38	0	0	0	0	0	0	0	0	0	0	1	0	0	0	0	0	0	0	0	0	0	72.4536	0
984	1	0	38	0	0	1	0	0	0	0	0	0	0	0	0	0	0	0	0	0	0	0	0	0	52.7773	0
985	1	0	38	0	0	0	0	0	0	0	0	0	0	1	0	0	0	0	0	0	0	1	0	0	72.4536	0
986	1	1	38	0	0	0	0	0	0	0	0	0	0	0	0	0	0	0	0	0	0	0	0	0	52.7773	0
987	1	1	38	0	0	1	0	0	0	0	0	0	0	0	0	0	0	0	0	0	0	0	0	0	52.7773	0
988	0	1	39	1	1	0	1	0	0	0	0	0	0	0	0	0	0	0	0	0	0	0	0	0	67.5989	0
989	0	1	39	1	1	0	1	0	0	0	0	0	0	0	0	0	0	0	0	0	0	0	0	0	67.5989	0
990	1	1	39	0	1	0	0	0	0	0	0	0	1	0	0	0	0	0	0	0	0	1	0	0	53.8884	0
991	0	1	39	0	0	0	0	0	0	0	0	0	0	0	0	0	0	0	0	0	0	0	0	0	32.2222	0
992	0	1	39	0	0	0	0	0	0	0	0	0	0	0	0	0	0	0	0	0	0	1	0	0	32.2222	0
993	0	1	39	0	0	0	0	0	0	0	0	0	0	0	0	0	0	0	0	0	0	0	0	0	32.2222	0
994	0	1	39	0	0	0	0	0	0	0	0	0	0	0	0	0	0	0	0	0	0	0	0	0	32.2222	0
995	0	1	39	0	0	0	0	0	0	0	0	0	0	0	0	0	0	0	0	0	0	0	0	0	32.2222	0
996	1	0	39	0	0	1	0	0	0	0	0	0	0	0	0	0	0	0	0	0	0	0	0	0	53.8884	0
997	0	1	39	1	0	0	0	0	0	0	0	0	0	0	0	0	0	0	0	0	0	0	0	0	53.446	0
998	0	1	39	0	0	0	0	0	0	0	0	0	0	0	0	0	0	0	0	0	0	0	0	0	32.2222	0
999	0	1	39	0	0	0	0	0	0	0	0	0	1	0	0	0	0	0	0	0	0	0	0	0	32.2222	0
1000	0	1	39	0	0	0	0	0	0	0	0	0	0	0	0	0	0	0	0	0	0	0	0	0	32.2222	0
1001	0	1	39	0	0	0	0	0	0	0	0	0	0	1	0	0	0	0	0	0	0	0	0	0	51.8985	0
1002	1	1	39	1	0	0	0	0	0	0	0	0	0	1	0	0	0	0	0	0	0	1	0	0	94.7884	1
1003	1	0	39	0	0	0	0	0	0	0	0	0	0	1	0	0	0	0	0	0	0	0	0	0	73.5647	0
1004	1	1	39	0	0	1	0	0	0	0	0	0	0	0	0	0	0	0	0	0	0	0	0	0	53.8884	0
1005	0	1	39	1	1	0	1	0	0	0	0	0	0	0	0	0	0	0	0	0	0	1	0	0	67.5989	0
1006	0	1	39	0	0	0	0	0	0	0	1	0	0	0	0	0	0	0	0	0	0	1	0	0	32.2222	0
1007	0	1	39	1	0	0	0	0	0	0	0	0	0	0	0	0	0	0	0	0	0	1	0	0	53.446	0
1008	0	1	39	1	0	1	0	0	0	0	0	0	0	0	0	0	0	0	0	0	0	0	0	0	53.446	0
1009	0	1	39	0	1	0	0	0	0	0	0	0	0	0	0	0	0	0	0	0	0	1	0	0	32.2222	0
1010	0	1	39	0	0	0	0	0	0	0	0	0	0	0	0	0	0	0	0	0	0	0	0	0	32.2222	0
1011	0	1	39	0	0	1	0	0	0	0	0	1	0	0	0	0	0	0	0	0	0	0	0	0	63.3313	0
1012	0	1	39	1	0	0	0	0	0	0	0	0	0	0	0	0	0	0	0	0	0	0	0	0	53.446	0
1013	0	1	39	1	0	0	0	0	0	0	0	0	0	0	0	0	0	0	0	0	0	0	0	0	53.446	0
1014	0	1	39	0	0	0	0	0	0	0	0	0	0	0	0	0	0	0	0	0	0	0	0	0	32.2222	0
1015	0	1	39	0	0	0	0	0	0	0	0	0	0	0	0	0	0	0	0	0	0	0	0	0	32.2222	0
1016	0	1	39	0	0	1	0	0	0	0	0	0	0	0	0	0	0	0	0	0	0	0	0	0	32.2222	0
1017	0	1	39	1	1	0	1	0	0	0	0	0	0	0	0	0	0	0	0	0	0	0	0	0	67.5989	0
1018	0	1	39	0	0	0	0	0	0	0	0	0	0	0	0	0	0	0	0	0	0	0	0	0	32.2222	0
1019	0	1	39	0	0	0	0	0	0	0	0	1	0	0	0	0	0	0	0	0	0	0	0	0	63.3313	0
1020	0	1	39	0	0	0	0	0	0	0	0	0	0	0	0	0	0	0	0	0	0	1	0	0	32.2222	0
1021	0	1	39	0	0	0	0	0	0	0	0	0	1	0	0	0	0	0	0	0	0	1	0	0	32.2222	0
1022	0	1	39	0	0	0	0	0	0	0	0	0	0	0	0	0	0	0	0	0	0	0	0	0	32.2222	0
1023	1	1	39	0	0	0	0	0	0	1	0	0	0	1	0	0	0	0	0	0	0	1	0	0	134.751	1
1024	1	1	39	0	0	0	0	0	0	0	0	0	0	0	0	0	0	0	0	0	0	1	0	0	53.8884	0
1025	1	0	39	0	0	1	0	0	0	0	0	0	0	0	0	0	0	0	0	0	0	1	0	0	53.8884	0
1026	1	1	39	0	0	0	0	0	0	0	0	0	0	0	0	0	0	0	0	0	0	1	1	0	53.8884	0
1027	1	1	39	0	0	0	0	0	0	0	0	0	0	0	0	0	0	0	0	0	0	1	0	0	53.8884	0
1028	1	1	39	0	0	0	0	0	0	0	0	0	0	0	0	0	0	0	0	0	0	0	0	0	53.8884	0
1029	1	0	39	0	0	0	0	0	0	0	0	0	0	0	0	0	0	0	0	0	0	0	0	0	53.8884	0
1030	1	1	39	0	0	1	0	0	0	0	0	0	0	0	0	0	0	0	0	0	0	1	0	0	53.8884	0
1031	1	0	40	0	0	1	0	0	0	0	0	0	0	0	0	0	0	0	0	0	0	1	0	0	54.9995	0
1032	1	0	40	1	0	0	0	0	0	0	0	0	0	0	0	0	0	0	0	0	0	1	1	0	76.2233	1
1033	0	1	40	0	0	0	0	0	0	0	0	0	0	0	0	0	0	0	0	0	0	0	0	0	33.3333	0
1034	0	1	40	0	0	0	0	0	0	0	0	0	0	0	0	0	0	0	0	0	0	0	0	0	33.3333	0
1035	1	0	40	1	0	0	0	0	0	0	0	0	0	0	0	0	0	0	0	0	0	1	0	0	76.2233	1
1036	0	1	40	0	0	0	0	0	0	0	0	0	1	0	0	0	0	0	0	0	0	1	0	0	33.3333	0
1037	0	1	40	0	0	0	0	0	0	0	0	0	0	0	0	0	0	0	0	0	0	0	0	0	33.3333	0
1038	0	1	40	1	0	0	0	0	0	0	0	0	0	0	0	0	0	0	0	0	0	0	0	0	54.5571	0
1039	0	1	40	0	0	0	0	0	0	0	0	0	1	0	0	0	0	0	0	0	0	0	0	0	33.3333	0
1040	0	1	40	0	0	0	0	0	0	0	0	0	0	0	0	0	0	0	0	0	0	1	0	0	33.3333	0
1041	0	1	40	0	0	0	0	0	0	0	0	0	0	0	0	0	0	0	0	0	0	1	0	0	33.3333	0
1042	0	1	40	0	0	1	0	0	0	0	0	0	0	0	0	0	0	0	0	0	0	0	0	0	33.3333	0
1043	0	1	40	0	0	0	0	0	0	0	0	0	0	0	0	0	0	0	0	0	0	0	0	0	33.3333	0
1044	0	1	40	1	1	0	1	0	0	0	0	0	0	0	0	0	0	0	0	0	0	1	0	0	68.71	0
1045	0	0	40	0	0	0	0	0	0	0	0	0	0	1	0	0	0	0	0	0	0	0	0	0	53.0096	0
1046	0	1	40	0	0	0	0	0	0	0	0	0	0	0	0	0	0	0	0	0	0	0	0	0	33.3333	0
1047	0	1	40	0	0	0	0	0	0	0	0	0	0	0	0	0	0	0	0	0	0	1	1	0	33.3333	0
1048	0	1	40	0	0	0	0	1	1	0	0	0	0	0	0	0	0	0	0	0	0	0	0	0	71.5062	0
1049	0	1	40	0	0	0	0	0	0	0	0	0	0	0	0	0	0	0	0	0	0	0	0	0	33.3333	0
1050	0	0	40	0	0	1	0	0	0	0	0	0	0	0	0	0	0	0	0	0	0	0	0	0	33.3333	0
1051	0	1	40	0	0	1	0	1	1	0	1	0	0	0	0	0	0	0	0	0	0	1	0	0	71.5062	0
1052	0	0	40	0	1	0	0	0	0	0	0	0	0	0	0	0	0	0	0	0	0	0	0	0	33.3333	0
1053	0	1	40	1	0	0	0	0	0	0	0	0	0	0	0	0	0	0	0	0	0	1	0	0	54.5571	0
1054	0	1	40	0	0	0	0	0	0	0	0	1	0	1	0	0	0	0	0	0	0	1	0	0	84.1186	1
1055	0	1	40	1	0	0	0	0	0	0	0	0	0	0	0	0	0	0	0	0	0	1	1	0	54.5571	0
1056	0	0	40	1	0	0	0	0	0	0	0	0	0	0	0	0	0	0	0	0	0	1	0	0	54.5571	0
1057	0	1	40	0	0	0	0	0	0	0	0	0	0	0	1	0	0	0	0	0	0	0	0	0	33.3333	0
1058	0	1	40	0	0	0	0	0	0	0	0	0	0	0	0	0	0	0	0	0	0	0	0	0	33.3333	0
1059	0	1	40	0	0	0	0	0	0	0	0	0	0	0	0	0	0	0	0	0	0	0	0	0	33.3333	0
1060	0	1	40	0	0	0	0	0	0	0	0	0	0	0	0	0	0	0	0	0	0	0	0	0	33.3333	0
1061	0	1	40	1	0	0	0	0	0	0	0	0	0	0	0	0	0	0	0	0	0	0	0	0	54.5571	0
1062	0	1	40	0	1	0	0	0	0	0	0	0	0	0	0	0	0	0	0	0	0	1	0	0	33.3333	0
1063	0	1	40	0	0	0	0	0	0	0	0	0	0	0	0	0	0	0	0	0	0	0	0	0	33.3333	0
1064	1	1	40	1	0	0	0	0	0	0	0	0	0	0	0	0	0	0	0	0	0	0	0	0	76.2233	1
1065	1	1	40	0	0	0	0	0	0	0	0	0	0	1	0	0	0	0	0	0	0	0	0	0	74.6758	0
1066	1	1	40	0	0	1	0	0	0	0	0	0	0	0	0	0	0	0	0	0	0	1	0	0	54.9995	0
1067	1	0	40	1	1	0	1	0	0	0	0	1	0	0	0	0	0	0	1	0	0	1	1	0	158.426	1
1068	1	0	40	0	0	1	0	0	0	0	0	0	0	0	0	0	0	0	0	0	0	1	0	0	54.9995	0
1069	1	1	40	0	0	0	0	0	0	0	1	0	0	0	0	0	0	0	0	0	0	0	0	0	54.9995	0
1070	1	1	40	0	0	0	0	0	0	0	0	0	0	0	0	0	0	0	0	0	0	1	0	0	54.9995	0
1071	1	1	40	0	0	0	0	0	0	0	0	0	0	0	0	0	0	0	0	0	0	0	0	0	54.9995	0
1072	1	1	40	0	0	0	0	0	0	0	0	0	0	0	0	0	0	0	0	0	0	0	0	0	54.9995	0
1073	1	1	40	0	0	0	0	0	0	0	0	0	1	0	0	0	0	0	0	0	0	0	0	0	54.9995	0
1074	0	1	41	0	0	0	0	0	0	0	0	0	0	0	0	0	0	0	0	0	0	1	1	0	34.4444	0
1075	0	1	41	0	0	0	0	0	0	0	0	0	0	0	1	0	0	0	0	0	0	1	0	0	34.4444	0
1076	0	1	41	0	0	0	0	0	0	0	0	0	0	0	0	0	0	0	0	0	0	1	0	0	34.4444	0
1077	0	1	41	0	0	0	0	0	0	0	0	0	0	0	0	0	0	0	0	0	0	0	0	0	34.4444	0
1078	1	0	41	0	0	0	0	0	0	0	1	0	0	1	0	0	0	0	0	0	0	0	0	0	75.7869	0
1079	1	1	41	0	0	1	1	0	0	0	0	0	1	0	0	0	0	0	0	0	0	1	0	0	70.2636	0
1080	1	0	41	0	0	0	0	0	0	0	0	0	0	0	0	0	0	0	0	0	0	0	0	0	56.1107	0
1081	0	1	41	0	0	0	0	0	0	0	0	0	0	0	0	0	0	0	0	0	0	0	0	0	34.4444	0
1082	0	1	41	0	0	0	0	0	0	0	0	0	0	0	0	0	0	0	0	0	0	0	0	0	34.4444	0
1083	1	0	41	0	0	1	0	0	0	0	0	1	0	0	0	0	0	0	0	0	0	1	0	0	87.2197	1
1084	0	1	41	0	0	0	0	0	0	0	0	0	0	0	0	0	0	0	0	0	0	0	0	0	34.4444	0
1085	1	1	41	0	0	0	0	0	0	0	0	0	0	1	0	0	1	0	0	0	0	1	1	0	75.7869	0
1086	0	1	41	0	0	0	0	0	0	0	0	0	0	0	0	0	0	0	0	0	0	0	0	0	34.4444	0
1087	0	1	41	0	0	0	0	0	0	0	0	0	0	0	0	0	0	0	0	0	0	0	0	0	34.4444	0
1088	0	1	41	0	0	0	0	0	0	0	0	0	0	0	0	0	0	0	0	0	0	1	0	0	34.4444	0
1089	0	1	41	0	0	0	0	0	0	0	0	0	0	0	1	0	0	0	0	0	0	1	0	0	34.4444	0
1090	0	1	41	0	0	0	0	0	0	0	1	0	0	1	0	0	0	0	0	0	0	1	0	0	54.1207	0
1091	0	0	41	0	0	0	0	0	0	0	0	0	0	0	0	0	0	0	1	0	0	0	0	0	71.3849	0
1092	0	1	41	0	0	0	0	0	0	0	0	0	0	0	0	0	0	0	0	0	0	1	0	0	34.4444	0
1093	0	1	41	0	0	0	0	0	1	0	0	0	0	0	0	0	0	0	0	0	0	0	0	0	34.4444	0
1094	0	1	41	0	0	0	0	0	0	0	0	0	0	1	0	0	0	0	0	0	0	0	0	0	54.1207	0
1095	0	1	41	0	0	0	0	0	0	0	0	0	0	0	0	0	0	0	0	0	0	0	0	0	34.4444	0
1096	0	1	41	0	0	0	0	0	0	0	0	0	0	0	0	0	0	0	0	0	0	0	0	0	34.4444	0
1097	0	1	41	0	0	0	0	0	0	0	0	0	0	0	0	0	0	0	0	0	0	0	0	0	34.4444	0
1098	0	1	41	0	0	0	0	0	0	0	0	0	0	0	0	0	0	0	0	0	0	0	0	0	34.4444	0
1099	0	0	41	1	1	0	1	0	0	0	0	0	0	0	0	0	0	0	0	0	0	0	0	0	69.8211	0
1100	0	0	41	0	0	0	0	0	0	0	0	0	0	0	1	0	0	0	0	0	0	0	0	0	34.4444	0
1101	0	1	41	0	0	0	0	0	0	0	0	0	0	0	0	0	0	0	0	0	0	1	0	0	34.4444	0
1102	0	1	41	0	0	0	0	0	0	0	0	0	0	0	0	0	0	0	0	0	0	0	0	0	34.4444	0
1103	0	1	41	0	0	0	0	0	0	0	0	0	0	0	0	0	0	0	0	0	0	1	0	0	34.4444	0
1104	1	1	41	0	0	1	0	0	0	0	0	0	0	1	0	0	0	0	0	0	0	1	0	0	75.7869	0
1105	1	0	41	0	0	0	0	0	0	0	0	0	1	0	0	0	0	0	0	0	0	1	0	0	56.1107	0
1106	0	1	42	0	0	0	0	0	0	0	0	0	0	1	0	0	0	0	0	0	0	0	0	0	55.2318	0
1107	1	1	42	0	0	0	0	0	0	0	0	0	0	0	0	0	0	0	0	0	0	1	0	0	57.2218	0
1108	0	1	42	0	0	0	0	0	0	0	0	0	0	0	1	0	0	0	0	0	0	1	0	0	35.5556	0
1109	0	1	42	0	0	0	0	0	0	0	0	0	0	0	0	0	0	0	0	0	0	0	0	0	35.5556	0
1110	0	1	42	0	0	0	0	0	0	0	0	0	0	0	0	0	0	0	0	0	0	1	0	0	35.5556	0
1111	1	1	42	0	0	0	0	0	0	0	0	0	0	0	0	0	0	0	0	0	0	0	0	0	57.2218	0
1112	1	1	42	1	1	0	1	0	0	0	0	0	0	0	0	0	0	0	0	0	0	1	0	0	92.5984	1
1113	0	1	42	0	0	0	0	0	0	0	0	0	0	0	0	0	0	0	0	0	0	0	0	0	35.5556	0
1114	0	1	42	0	0	0	0	0	0	0	0	0	0	0	0	0	0	0	0	0	0	1	0	0	35.5556	0
1115	0	1	42	0	0	0	0	0	0	0	0	0	0	0	0	0	0	0	0	0	0	0	0	0	35.5556	0
1116	0	1	42	0	1	0	0	0	0	0	1	0	0	0	0	0	0	0	0	0	0	1	0	0	35.5556	0
1117	0	1	42	0	1	0	0	0	0	0	0	0	0	0	0	0	0	0	0	0	0	0	0	0	35.5556	0
1118	0	0	42	0	0	1	0	0	0	0	1	0	0	0	0	0	0	0	0	0	0	0	0	0	35.5556	0
1119	0	1	42	0	0	0	0	0	0	0	0	0	0	0	0	0	0	0	0	0	0	0	0	0	35.5556	0
1120	0	1	42	0	0	0	0	0	0	0	0	0	0	0	0	0	0	0	0	0	0	1	0	0	35.5556	0
1121	0	1	42	0	1	0	0	0	0	0	0	0	0	1	0	0	0	0	0	0	0	0	0	0	55.2318	0
1122	0	1	42	0	0	0	0	0	0	0	0	0	0	0	0	0	0	0	0	0	0	1	0	0	35.5556	0
1123	0	1	42	0	0	0	0	0	0	0	0	0	0	0	0	0	0	0	0	0	0	1	0	0	35.5556	0
1124	0	1	42	0	0	0	0	0	0	0	0	0	0	0	0	0	0	0	0	0	0	0	0	0	35.5556	0
1125	0	0	42	0	0	0	0	0	0	0	0	0	0	0	0	0	0	0	0	0	0	1	0	0	35.5556	0
1126	0	1	42	0	0	0	0	0	0	0	0	0	0	0	0	0	0	0	0	0	0	0	0	0	35.5556	0
1127	0	0	42	0	0	0	0	0	0	0	0	0	0	0	0	0	0	0	0	0	0	0	0	0	35.5556	0
1128	0	1	42	0	0	0	0	0	0	0	0	0	0	0	0	0	0	0	0	0	0	1	0	0	35.5556	0
1129	0	0	42	0	0	0	0	0	0	0	0	0	0	0	0	0	0	0	0	0	0	1	1	0	35.5556	0
1130	1	1	42	0	0	0	0	0	0	0	0	0	0	0	0	0	0	0	0	0	0	0	0	0	57.2218	0
1131	1	0	42	0	0	0	0	0	0	0	0	0	0	0	0	0	0	0	0	0	0	0	0	0	57.2218	0
1132	1	0	42	0	0	1	0	0	0	0	0	0	0	0	0	0	0	0	0	0	0	0	0	0	57.2218	0
1133	1	1	42	1	1	0	1	0	0	0	0	0	0	0	0	0	0	0	0	0	0	0	0	0	92.5984	1
1134	1	0	42	0	0	0	0	0	0	0	0	0	1	0	0	0	0	0	0	0	0	0	0	0	57.2218	0
1135	1	1	42	0	0	0	0	0	0	0	0	0	0	0	0	0	0	0	0	0	0	1	0	0	57.2218	0
1136	0	1	43	1	0	0	0	0	0	0	0	0	0	0	0	0	0	0	0	0	0	0	0	0	57.8904	0
1137	0	0	43	0	0	1	0	0	0	0	0	0	0	0	0	0	0	0	0	0	0	0	0	0	36.6667	0
1138	0	0	43	0	0	0	0	0	0	0	0	0	0	0	0	0	0	0	0	0	0	0	0	0	36.6667	0
1139	0	1	43	0	0	0	0	0	0	0	0	0	0	0	0	0	0	0	0	0	0	0	0	0	36.6667	0
1140	1	1	43	0	0	0	0	0	0	0	0	0	0	0	0	0	0	0	0	0	0	0	0	0	58.3329	0
1141	1	1	43	0	0	1	0	0	0	0	0	0	0	0	0	0	0	0	0	0	0	0	0	0	58.3329	0
1142	0	1	43	0	0	0	0	0	0	0	0	0	0	0	0	0	0	0	0	0	0	1	0	0	36.6667	0
1143	0	1	43	0	0	0	0	0	0	0	0	0	0	0	0	0	0	0	0	0	0	1	0	0	36.6667	0
1144	0	1	43	0	0	0	1	0	0	0	0	0	0	0	0	0	0	0	0	0	0	1	0	0	50.8196	0
1145	0	1	43	0	0	1	0	0	0	0	1	0	0	0	0	0	0	0	0	0	0	1	0	0	36.6667	0
1146	0	1	43	1	1	0	1	0	0	0	0	0	0	0	0	0	0	0	0	0	0	0	0	0	72.0433	0
1147	0	1	43	0	0	0	0	0	1	0	0	0	0	0	0	0	0	0	0	0	0	0	0	0	36.6667	0
1148	0	1	43	0	0	0	0	0	0	0	0	0	0	0	0	0	0	0	0	0	0	1	0	0	36.6667	0
1149	0	1	43	0	0	0	0	0	0	0	0	0	1	0	0	0	0	0	0	0	0	0	0	0	36.6667	0
1150	0	1	43	0	0	1	0	0	0	0	0	0	0	0	0	0	0	0	0	0	0	0	0	0	36.6667	0
1151	0	1	43	0	0	0	0	0	0	0	0	0	0	0	0	0	0	0	0	0	0	1	0	0	36.6667	0
1152	0	1	43	0	0	0	0	0	0	0	0	0	0	0	0	0	0	0	0	0	0	0	0	0	36.6667	0
1153	0	1	43	0	0	0	0	0	0	0	0	0	0	0	0	0	0	0	0	0	0	1	0	0	36.6667	0
1154	0	1	43	0	0	0	0	0	0	0	0	0	0	0	0	0	0	0	0	0	0	0	0	0	36.6667	0
1155	1	0	43	0	0	1	0	0	0	0	0	0	0	0	0	0	0	0	0	0	0	1	0	0	58.3329	0
1156	1	0	43	0	0	0	1	0	0	0	0	0	0	0	0	0	0	0	0	0	0	1	0	0	72.4858	0
1157	1	0	43	0	1	0	0	0	0	0	0	1	0	0	0	0	0	0	0	0	0	1	1	0	89.4419	1
1158	0	0	44	0	0	0	0	0	0	0	0	0	0	1	0	0	0	0	0	0	0	1	0	0	57.454	0
1159	1	1	44	0	0	1	0	0	0	0	0	0	0	0	0	0	0	0	0	0	0	1	0	0	59.444	0
1160	0	1	44	0	0	0	0	0	0	0	0	0	0	0	0	0	0	0	0	0	0	0	0	0	37.7778	0
1161	0	1	44	0	0	0	0	0	0	0	0	0	0	0	0	0	0	0	0	0	0	0	0	0	37.7778	0
1162	0	0	44	0	0	0	0	0	0	0	0	0	0	0	0	0	0	0	0	0	0	1	0	0	37.7778	0
1163	0	1	44	0	0	0	0	0	0	0	0	0	0	0	0	0	0	0	0	0	0	0	0	0	37.7778	0
1164	0	1	44	1	1	0	1	0	0	0	0	1	0	0	0	0	0	0	0	0	0	0	0	0	104.263	1
1165	1	1	44	0	0	0	0	0	0	0	0	0	0	0	0	0	0	0	0	0	0	0	0	0	59.444	0
1166	1	0	44	0	0	0	0	0	0	0	0	0	1	0	0	0	0	0	0	0	0	1	0	0	59.444	0
1167	0	0	44	0	0	0	0	0	0	0	0	0	0	0	0	0	0	0	0	0	0	0	0	0	37.7778	0
1168	0	1	44	0	0	0	0	0	0	0	0	0	0	0	0	0	0	0	0	0	0	0	0	0	37.7778	0
1169	0	1	44	1	1	0	0	0	0	0	0	0	0	0	0	0	0	0	0	0	0	0	0	0	59.0016	0
1170	0	1	44	0	0	0	0	0	0	0	0	0	0	0	0	0	0	0	0	0	0	0	0	0	37.7778	0
1171	0	0	44	0	0	0	0	0	0	0	0	0	0	1	0	0	0	0	0	0	0	0	0	0	57.454	0
1172	0	0	44	0	0	0	0	0	0	0	0	0	0	0	0	0	0	0	0	0	0	1	0	0	37.7778	0
1173	0	1	44	0	0	0	0	0	0	0	0	0	0	0	0	0	0	0	0	0	0	0	0	0	37.7778	0
1174	0	0	44	0	0	1	0	0	0	0	0	0	0	0	0	0	0	0	0	0	0	0	0	0	37.7778	0
1175	0	1	44	1	0	0	0	0	0	0	0	0	0	0	0	0	0	0	0	0	0	1	1	0	59.0016	0
1176	0	1	44	0	1	0	0	0	0	0	0	0	0	1	0	0	0	0	0	0	0	1	1	0	57.454	0
1177	0	1	44	0	0	0	0	0	0	0	0	0	0	0	0	0	0	0	0	0	0	0	0	0	37.7778	0
1178	0	1	44	0	0	0	0	0	0	0	0	0	0	0	0	0	0	0	0	0	0	0	0	0	37.7778	0
1179	0	0	44	0	0	0	0	0	0	0	0	0	0	0	1	0	0	0	0	0	0	0	0	0	37.7778	0
1180	0	1	44	0	0	0	0	0	0	0	0	0	0	0	0	0	0	0	0	0	0	0	0	0	37.7778	0
1181	0	1	44	0	0	0	0	0	0	0	0	0	1	0	0	0	0	0	0	0	0	0	0	0	37.7778	0
1182	0	0	44	0	0	0	0	0	0	0	1	0	0	0	0	0	0	0	0	0	0	1	0	0	37.7778	0
1183	1	0	44	0	0	0	0	0	0	0	0	0	0	1	0	0	0	0	0	0	0	0	0	0	79.1202	1
1184	1	0	44	0	0	0	0	0	0	0	0	0	1	0	0	0	0	0	0	0	0	1	0	0	59.444	0
1185	1	0	44	0	0	0	0	0	0	0	0	0	0	0	0	0	0	0	0	0	0	1	1	0	59.444	0
1186	1	1	44	0	0	0	0	0	0	0	0	0	0	0	0	0	0	0	0	0	0	1	0	0	59.444	0
1187	1	0	45	0	0	0	0	0	0	0	0	0	0	0	0	0	0	0	0	0	0	1	0	0	60.5551	0
1188	0	1	45	0	0	0	0	0	0	0	0	0	0	0	0	0	0	0	0	0	0	1	0	0	38.8889	0
1189	1	0	45	0	0	1	0	0	0	0	0	0	0	1	0	0	0	0	0	0	0	0	0	0	80.2313	1
1190	0	1	45	0	0	0	0	0	0	0	0	0	0	0	0	0	0	0	0	0	0	0	0	0	38.8889	0
1191	1	1	45	0	0	0	0	0	0	0	0	0	0	0	0	0	0	1	0	0	0	1	0	0	60.5551	0
1192	0	0	45	0	0	0	0	0	0	0	0	0	0	0	0	0	0	0	0	0	0	0	0	0	38.8889	0
1193	0	1	45	0	0	0	0	0	0	0	0	0	0	1	0	0	0	0	0	0	0	1	0	0	58.5651	0
1194	0	1	45	0	0	0	0	0	0	0	0	0	0	0	0	0	0	0	0	0	0	0	0	0	38.8889	0
1195	0	1	45	1	1	0	1	0	0	0	0	0	0	0	0	0	0	0	0	0	0	0	0	0	74.2656	0
1196	0	1	45	0	0	0	0	0	0	0	0	0	0	1	0	0	0	0	0	0	0	1	0	0	58.5651	0
1197	0	0	45	0	0	0	0	0	0	0	0	0	0	0	1	0	0	0	0	0	0	1	0	0	38.8889	0
1198	0	1	45	0	0	0	0	0	0	0	0	0	0	0	0	0	0	0	0	0	0	1	0	0	38.8889	0
1199	0	0	45	0	0	0	0	0	0	0	0	0	0	0	0	0	0	0	0	0	0	0	0	0	38.8889	0
1200	0	1	45	0	0	1	0	0	0	0	0	0	1	0	0	0	0	0	0	0	0	0	0	0	38.8889	0
1201	0	0	45	0	0	0	0	0	0	0	0	0	0	0	0	0	0	0	0	0	0	1	0	0	38.8889	0
1202	0	1	45	1	1	0	1	0	0	0	0	0	0	0	0	0	0	0	0	0	0	1	0	0	74.2656	0
1203	0	0	45	0	0	0	0	0	0	0	0	0	0	1	0	0	0	0	0	0	0	1	0	0	58.5651	0
1204	0	1	45	0	0	0	0	0	0	0	0	0	0	0	0	0	0	0	0	0	0	0	0	0	38.8889	0
1205	0	1	45	0	0	0	0	0	0	0	0	0	0	0	0	0	0	0	0	0	0	0	0	0	38.8889	0
1206	0	0	45	0	0	0	0	0	0	0	0	0	0	0	0	0	0	0	0	0	0	0	0	0	38.8889	0
1207	0	1	45	0	0	0	0	0	0	0	0	0	0	0	0	0	0	0	0	0	0	0	0	0	38.8889	0
1208	0	0	45	0	0	0	0	0	0	0	0	0	0	1	0	0	0	0	0	0	0	0	0	0	58.5651	0
1209	0	1	45	0	0	0	0	0	0	0	0	0	0	0	0	0	0	0	0	0	0	1	0	0	38.8889	0
1210	0	1	45	0	0	0	0	0	0	0	0	0	0	0	0	0	0	0	0	0	0	0	0	0	38.8889	0
1211	0	1	45	0	0	0	0	0	0	0	0	0	0	0	0	0	0	0	0	0	0	1	0	0	38.8889	0
1212	0	0	45	0	0	1	0	0	0	0	0	0	0	0	0	0	0	0	0	0	0	1	0	0	38.8889	0
1213	1	0	45	0	0	0	0	0	0	0	0	0	0	0	0	0	0	0	0	0	0	0	0	0	60.5551	0
1214	1	1	45	0	0	1	0	0	0	0	0	0	0	0	0	0	0	0	0	0	0	0	0	0	60.5551	0
1215	1	1	45	0	0	0	0	0	0	0	0	0	0	1	0	0	0	0	0	0	0	0	0	0	80.2313	1
1216	1	1	45	0	0	0	0	0	0	0	0	0	0	0	0	0	0	0	0	0	0	0	0	0	60.5551	0
1217	1	0	45	0	0	1	0	0	0	0	0	0	0	0	0	0	0	0	0	0	0	1	0	0	60.5551	0
1218	1	0	45	1	1	0	1	0	0	0	0	0	0	0	0	0	0	0	1	0	0	1	1	0	132.872	1
1219	1	1	46	0	0	0	0	0	0	0	0	0	0	0	0	0	0	0	0	0	0	0	0	0	61.6662	0
1220	0	0	46	0	0	0	0	0	0	0	0	0	1	0	0	0	0	0	0	0	0	0	0	0	40	0
1221	1	0	46	0	0	0	0	0	0	0	0	0	0	0	0	0	0	0	0	0	0	0	0	0	61.6662	0
1222	1	0	46	0	1	0	0	0	0	0	0	0	0	0	0	0	0	0	0	0	0	1	0	0	61.6662	0
1223	0	0	46	0	0	0	0	0	0	0	1	0	0	0	0	0	0	0	0	0	0	0	0	0	40	0
1224	0	1	46	0	0	0	0	0	0	0	0	0	0	0	1	0	0	0	0	0	0	1	0	0	40	0
1225	1	1	46	0	0	1	0	0	0	0	0	0	0	0	0	0	0	0	0	0	0	0	0	0	61.6662	0
1226	1	0	46	0	0	0	0	0	0	0	0	0	0	0	0	0	0	0	1	0	0	0	0	0	98.6067	1
1227	0	1	46	0	0	0	0	0	0	0	0	0	0	0	0	0	0	0	0	0	0	1	0	0	40	0
1228	0	1	46	0	0	0	0	0	0	0	0	0	0	0	0	0	0	0	0	0	0	1	0	0	40	0
1229	0	1	46	0	0	0	0	1	1	0	0	0	0	0	0	0	0	0	0	0	0	0	0	0	78.1729	1
1230	0	1	46	0	0	0	0	0	0	0	0	0	0	0	0	0	0	0	0	0	0	1	0	0	40	0
1231	0	0	46	0	0	0	0	0	0	0	0	0	0	0	0	0	0	0	0	0	0	1	0	0	40	0
1232	0	0	46	0	0	0	0	0	0	0	0	0	0	0	0	0	0	0	1	0	0	0	0	0	76.9405	1
1233	0	1	46	0	0	0	0	0	0	0	0	0	0	0	0	0	0	0	0	0	0	1	0	0	40	0
1234	0	1	46	0	0	0	0	0	0	0	0	0	0	0	0	0	0	0	0	0	0	0	0	0	40	0
1235	0	0	46	0	0	0	0	0	0	0	0	0	0	0	0	0	0	0	0	0	0	1	0	0	40	0
1236	0	0	46	0	1	0	0	0	0	0	0	0	0	0	0	0	0	0	0	0	0	1	0	0	40	0
1237	0	1	46	0	0	1	0	0	0	0	0	0	0	0	0	0	0	0	0	0	0	0	0	0	40	0
1238	0	1	46	0	0	1	0	0	0	0	0	0	0	0	0	0	0	0	0	0	0	1	0	0	40	0
1239	0	1	46	0	0	0	0	0	0	0	0	0	0	0	0	0	0	0	0	0	0	0	0	0	40	0
1240	0	1	46	0	0	0	0	0	0	0	0	0	0	0	0	0	0	0	0	0	0	0	0	0	40	0
1241	0	0	46	0	0	0	0	0	0	0	0	0	0	0	0	0	0	0	0	0	0	0	0	0	40	0
1242	0	1	46	0	0	0	0	0	0	0	1	0	0	1	0	0	0	0	0	0	0	0	0	0	59.6762	0
1243	0	1	46	0	0	1	0	0	0	0	1	0	0	0	0	0	0	0	0	0	0	0	0	0	40	0
1244	1	1	46	0	0	1	1	1	1	0	0	1	0	1	0	0	0	0	0	0	0	1	1	0	164.777	1
1245	1	1	46	0	0	0	0	0	0	0	0	0	0	0	0	0	0	0	0	0	0	0	0	0	61.6662	0
1246	1	1	46	0	0	0	0	0	0	0	0	0	0	1	0	0	0	0	0	0	0	0	0	0	81.3424	1
1247	1	0	46	0	0	1	0	0	0	0	0	0	0	1	0	0	0	0	0	0	0	0	0	0	81.3424	1
1248	1	1	46	0	0	1	0	0	0	0	0	0	0	0	0	0	0	0	0	0	0	1	0	0	61.6662	0
1249	1	0	46	0	0	0	0	0	0	0	0	0	0	0	0	0	0	0	0	0	0	1	0	0	61.6662	0
1250	1	0	47	1	0	1	0	1	1	0	0	0	1	0	0	0	0	0	0	0	0	0	0	0	122.174	1
1251	0	0	47	1	1	0	1	0	0	0	0	0	0	0	0	0	0	0	0	0	0	0	0	0	76.4878	1
1252	1	1	47	1	1	0	1	0	0	0	0	0	0	1	0	0	0	0	0	0	0	0	0	0	117.83	1
1253	0	1	47	0	0	0	0	0	0	0	0	0	0	1	0	0	0	0	0	0	0	1	0	0	60.7873	0
1254	1	0	47	0	0	0	0	0	0	0	0	0	0	1	0	0	0	0	0	0	0	0	0	0	82.4536	1
1255	0	1	47	0	0	0	0	0	0	0	0	0	0	0	0	0	0	0	0	0	0	1	1	0	41.1111	0
1256	0	0	47	0	0	0	0	0	0	0	0	0	0	0	0	0	0	0	0	0	0	1	0	0	41.1111	0
1257	0	1	47	0	0	0	0	0	0	0	0	0	0	0	0	0	0	0	0	0	0	0	0	0	41.1111	0
1258	0	0	47	0	0	0	0	0	0	0	0	0	0	1	0	0	0	0	0	0	0	0	0	0	60.7873	0
1259	0	0	47	1	1	0	1	0	0	0	0	0	0	0	0	0	0	0	0	0	0	1	0	0	76.4878	1
1260	0	1	47	0	0	0	0	0	0	0	0	0	0	0	0	0	0	0	0	0	0	0	0	0	41.1111	0
1261	0	0	47	0	0	0	0	0	0	0	0	0	0	1	0	0	0	0	0	0	0	1	0	0	60.7873	0
1262	0	1	47	0	0	0	0	0	0	0	0	0	0	0	0	0	0	0	0	0	0	0	0	0	41.1111	0
1263	0	1	47	0	0	1	0	0	0	0	1	0	0	0	0	0	0	0	0	0	0	1	0	0	41.1111	0
1264	0	1	47	0	0	1	0	0	0	0	0	0	0	0	1	0	0	0	0	0	0	0	0	0	41.1111	0
1265	0	1	47	1	1	0	0	0	0	0	0	1	0	1	0	0	0	0	0	0	0	1	1	0	113.12	1
1266	0	1	47	0	0	0	0	0	0	0	0	0	0	0	0	0	0	0	0	0	0	1	0	0	41.1111	0
1267	0	1	47	0	0	0	0	0	0	0	0	0	0	0	0	0	0	0	0	0	0	1	0	0	41.1111	0
1268	0	1	47	0	0	0	0	0	0	0	0	0	0	0	0	0	0	0	0	0	0	0	0	0	41.1111	0
1269	0	0	47	0	0	1	0	0	0	0	0	0	0	0	0	0	0	0	0	0	0	0	0	0	41.1111	0
1270	0	1	47	0	0	0	0	0	0	0	0	0	0	0	0	0	0	0	0	0	0	0	0	0	41.1111	0
1271	0	1	47	0	0	0	0	0	0	0	0	0	0	0	0	0	0	0	0	0	0	0	0	0	41.1111	0
1272	0	1	47	0	0	0	0	0	0	0	0	0	0	0	0	0	0	0	0	0	0	0	0	0	41.1111	0
1273	0	1	47	0	0	0	0	0	0	0	0	0	0	0	0	0	0	0	0	0	0	0	0	0	41.1111	0
1274	0	1	47	0	0	0	0	0	0	0	0	0	0	0	0	0	0	0	0	0	0	1	0	0	41.1111	0
1275	0	1	47	0	0	0	0	0	0	0	1	0	0	0	0	0	0	0	0	0	0	1	0	0	41.1111	0
1276	1	0	47	0	0	1	0	0	0	0	0	0	0	0	0	0	0	0	0	0	0	1	1	0	62.7773	0
1277	1	0	47	0	0	0	0	0	0	0	0	0	0	0	0	0	0	0	0	0	0	1	0	0	62.7773	0
1278	1	1	47	0	0	0	0	0	0	0	0	1	0	0	0	0	0	0	0	0	0	0	0	0	93.8864	1
1279	1	0	47	0	0	0	0	0	0	0	0	0	0	0	0	0	0	0	0	0	0	0	0	0	62.7773	0
1280	1	1	47	0	0	0	0	0	0	0	0	0	0	1	0	0	0	0	0	0	0	1	0	0	82.4536	1
1281	1	1	47	0	0	0	0	0	0	0	0	0	0	0	0	0	0	0	0	0	0	0	0	0	62.7773	0
1282	1	1	47	0	0	1	0	0	0	0	0	0	0	0	0	0	0	0	0	0	0	1	0	0	62.7773	0
1283	1	0	47	0	0	0	0	0	0	0	0	0	0	1	0	0	0	0	0	0	0	1	0	0	82.4536	1
1284	0	0	48	0	0	0	0	0	0	0	0	0	1	0	0	0	0	0	0	0	0	1	0	0	42.2222	0
1285	1	0	48	0	0	1	0	0	0	0	0	0	0	0	0	0	0	0	0	0	0	0	0	0	63.8884	0
1286	1	1	48	1	1	0	1	0	1	0	0	0	0	0	0	0	0	0	0	0	0	0	0	0	99.2651	1
1287	0	1	48	0	0	1	0	0	0	0	0	0	0	0	0	0	0	0	0	0	0	0	0	0	42.2222	0
1288	1	1	48	0	0	1	0	0	0	0	0	0	0	0	0	0	0	0	0	0	0	0	0	0	63.8884	0
1289	1	0	48	0	0	0	0	0	0	0	0	0	0	0	0	0	0	0	0	0	0	0	0	0	63.8884	0
1290	0	1	48	0	0	0	0	0	0	0	0	0	0	0	0	0	0	0	0	0	0	0	0	0	42.2222	0
1291	0	1	48	0	0	0	0	0	0	0	1	0	0	0	0	0	0	0	0	0	0	1	0	0	42.2222	0
1292	0	1	48	0	0	0	0	0	0	0	0	0	0	0	0	0	0	0	0	0	0	1	0	0	42.2222	0
1293	0	0	48	0	0	0	0	0	0	0	0	0	0	0	0	0	0	0	0	0	0	1	0	0	42.2222	0
1294	0	0	48	0	0	1	0	0	0	0	0	0	0	0	0	0	0	0	0	0	0	1	0	0	42.2222	0
1295	0	0	48	0	0	1	0	0	0	0	0	0	0	0	0	0	0	0	0	0	0	1	1	0	42.2222	0
1296	0	0	48	0	0	1	0	0	0	0	0	0	1	0	0	0	0	0	0	0	0	0	0	0	42.2222	0
1297	0	1	48	0	1	0	0	0	0	0	0	1	0	1	0	0	0	0	1	0	0	0	0	0	129.948	1
1298	0	1	48	0	0	0	0	0	0	0	0	0	0	0	0	0	0	0	0	0	0	1	0	0	42.2222	0
1299	0	1	48	0	0	0	0	0	0	0	0	0	0	0	0	0	0	0	0	0	0	1	0	0	42.2222	0
1300	0	0	48	0	0	0	0	0	0	0	0	0	0	0	0	0	0	0	0	0	0	1	0	0	42.2222	0
1301	0	1	48	0	0	0	0	0	0	0	0	0	0	0	0	0	0	0	0	0	0	1	0	0	42.2222	0
1302	0	0	48	0	0	0	0	0	0	0	0	0	0	0	0	0	0	0	0	0	0	0	0	0	42.2222	0
1303	0	1	48	0	0	0	0	0	0	0	0	0	0	0	0	0	0	0	0	0	0	1	0	0	42.2222	0
1304	0	0	48	0	0	0	0	0	0	0	0	0	0	1	0	0	0	0	0	0	0	0	0	0	61.8984	0
1305	0	1	48	0	0	0	0	0	0	0	0	0	1	0	0	0	0	0	0	0	0	0	0	0	42.2222	0
1306	0	1	48	0	0	0	0	0	0	0	1	0	0	0	0	0	0	0	0	0	0	0	0	0	42.2222	0
1307	0	1	48	0	0	0	0	0	0	0	0	0	0	0	0	0	0	0	0	0	0	0	0	0	42.2222	0
1308	0	1	48	0	0	0	0	0	0	0	0	0	1	0	0	0	0	0	0	0	0	0	0	0	42.2222	0
1309	0	1	48	0	0	0	0	0	0	0	0	0	0	0	0	0	0	0	0	0	0	0	0	0	42.2222	0
1310	0	1	48	0	0	0	0	0	0	0	0	0	0	0	0	0	0	0	0	0	0	1	0	0	42.2222	0
1311	0	1	48	0	0	0	0	0	0	0	0	0	0	0	0	0	0	0	0	0	0	1	0	0	42.2222	0
1312	0	0	48	0	0	0	0	0	0	0	0	0	0	0	0	0	0	0	0	0	0	0	0	0	42.2222	0
1313	0	1	48	1	1	0	1	0	0	0	0	0	0	0	0	0	0	0	0	0	0	1	0	0	77.5989	1
1314	0	1	48	0	0	0	0	0	0	0	0	0	0	0	0	0	0	0	0	0	0	1	0	0	42.2222	0
1315	0	1	48	0	0	0	0	0	0	0	0	0	0	0	0	0	0	0	0	0	0	0	0	0	42.2222	0
1316	0	1	48	0	0	0	0	0	0	0	0	0	0	0	0	0	0	0	0	0	0	1	1	0	42.2222	0
1317	0	1	48	0	0	0	0	0	0	0	0	0	0	0	0	0	0	0	0	0	0	0	0	0	42.2222	0
1318	1	0	48	0	0	1	0	0	0	0	0	0	1	0	0	0	0	0	0	0	0	1	0	0	63.8884	0
1319	1	0	48	0	0	0	0	0	0	0	0	0	0	0	0	0	0	0	0	0	0	1	0	0	63.8884	0
1320	1	1	48	0	0	0	0	0	0	0	0	0	0	0	0	0	0	0	0	0	0	0	0	0	63.8884	0
1321	1	0	48	0	0	0	0	0	0	0	0	0	0	0	0	0	0	0	0	0	0	0	0	0	63.8884	0
1322	1	1	48	0	0	0	0	0	0	0	1	0	0	0	1	0	0	0	0	0	1	1	1	0	63.8884	0
1323	1	1	48	0	0	0	0	0	0	1	0	0	0	1	0	0	0	0	0	1	0	0	0	0	144.751	1
1324	1	0	48	1	0	0	0	0	0	0	0	0	0	0	0	0	0	0	1	0	0	1	1	0	122.053	1
1325	1	1	49	0	0	0	0	0	0	0	0	0	0	1	0	0	0	0	0	0	0	1	0	0	84.6758	1
1326	1	1	49	1	1	0	1	0	0	0	0	0	0	0	0	0	0	0	1	0	0	1	1	0	137.317	1
1327	1	0	49	0	0	1	1	0	0	0	0	0	0	0	1	0	0	0	0	0	0	1	0	0	79.1524	1
1328	1	0	49	0	0	0	0	0	0	0	0	0	0	0	0	0	0	0	0	0	0	1	1	0	64.9995	0
1329	1	0	49	0	0	1	0	0	0	0	0	0	1	0	0	0	0	0	0	0	0	1	0	0	64.9995	0
1330	0	1	49	0	0	0	0	0	0	0	0	0	0	0	0	0	0	0	0	0	0	0	0	0	43.3333	0
1331	1	1	49	0	0	1	0	0	0	0	0	0	0	0	0	0	0	0	0	0	0	0	0	0	64.9995	0
1332	1	1	49	0	0	0	0	0	0	0	0	0	0	0	0	0	0	0	0	0	0	0	0	0	64.9995	0
1333	0	1	49	0	0	0	0	0	0	0	0	1	0	1	0	0	0	0	0	0	0	1	0	0	94.1186	1
1334	1	0	49	0	0	0	0	0	0	0	0	0	0	0	0	0	0	0	0	0	0	1	1	0	64.9995	0
1335	1	0	49	0	0	0	0	0	0	0	0	0	0	1	0	0	0	0	0	0	0	0	0	0	84.6758	1
1336	0	1	49	0	0	0	0	0	0	0	0	0	0	0	0	0	0	0	0	0	0	0	0	0	43.3333	0
1337	0	1	49	0	0	0	0	0	0	0	0	0	0	0	0	0	0	0	0	0	0	0	0	0	43.3333	0
1338	0	0	49	0	0	1	0	0	0	0	0	0	0	1	0	0	0	0	0	0	0	1	0	0	63.0096	0
1339	0	1	49	0	0	0	0	0	0	0	0	0	0	0	0	0	0	0	0	0	0	0	0	0	43.3333	0
1340	0	0	49	0	0	0	0	0	0	0	0	0	0	0	1	0	0	0	0	0	0	1	0	0	43.3333	0
1341	0	1	49	0	0	0	0	0	0	0	0	0	1	1	0	0	0	0	0	0	0	0	0	0	63.0096	0
1342	0	0	49	0	0	0	0	0	0	0	0	0	0	0	0	0	0	0	0	0	0	1	0	0	43.3333	0
1343	0	0	49	0	0	0	0	0	0	0	0	0	0	0	0	0	0	0	0	0	0	0	0	0	43.3333	0
1344	0	1	49	0	0	0	0	0	0	0	0	0	1	0	0	0	0	0	0	0	0	0	0	0	43.3333	0
1345	0	1	49	0	0	0	0	0	0	0	0	0	0	0	0	0	0	0	0	0	0	1	0	0	43.3333	0
1346	0	1	49	0	0	0	0	0	0	0	0	0	0	0	0	0	0	0	0	0	0	1	0	0	43.3333	0
1347	0	1	49	0	0	0	0	0	0	0	0	0	0	0	0	0	0	0	0	0	0	0	0	0	43.3333	0
1348	0	1	49	0	0	0	0	0	0	0	0	0	0	0	0	0	0	0	0	0	0	0	0	0	43.3333	0
1349	0	0	49	0	0	0	0	0	0	0	0	0	0	0	0	0	0	0	0	0	0	0	0	0	43.3333	0
1350	0	1	49	0	0	0	0	0	0	0	0	0	0	0	0	0	0	0	0	0	0	0	0	0	43.3333	0
1351	0	1	49	0	0	0	0	0	0	0	0	1	0	0	0	0	0	0	0	0	0	0	0	0	74.4424	0
1352	0	1	49	1	0	0	0	0	0	0	0	0	0	0	0	0	0	0	0	0	0	1	0	0	64.5571	0
1353	1	0	49	0	0	0	0	0	0	0	0	0	0	0	0	0	0	0	0	0	0	0	0	0	64.9995	0
1354	1	0	49	0	0	1	0	0	0	0	0	0	0	0	0	0	0	0	0	0	0	1	1	0	64.9995	0
1355	1	0	49	0	0	1	0	0	0	0	0	0	0	0	0	0	0	0	0	0	0	0	0	0	64.9995	0
1356	1	1	49	0	0	0	0	0	0	0	0	0	0	0	0	0	0	0	0	0	0	0	0	0	64.9995	0
1357	1	1	49	0	0	0	0	0	0	0	0	0	0	0	0	0	0	0	0	0	0	0	0	0	64.9995	0
1358	1	0	49	0	0	0	0	0	0	0	0	0	0	0	0	0	0	0	0	0	0	1	0	0	64.9995	0
1359	1	1	49	0	0	1	0	0	0	0	0	1	0	1	0	0	0	0	0	0	0	1	0	0	115.785	1
1360	1	0	49	0	0	0	0	0	0	0	0	0	0	1	0	0	0	0	0	0	0	0	0	0	84.6758	1
1361	1	1	49	0	0	0	0	0	0	0	0	0	0	0	0	0	0	0	0	0	0	0	0	0	64.9995	0
1362	1	0	49	0	0	0	0	0	0	0	0	0	0	0	0	0	0	0	0	0	0	0	0	0	64.9995	0
1363	1	1	49	0	0	0	0	0	0	0	0	0	0	0	0	0	0	0	0	0	0	0	0	0	64.9995	0
1364	1	1	49	0	0	0	0	0	0	0	0	0	0	1	0	0	0	0	0	0	0	1	1	0	84.6758	1
1365	0	1	50	0	0	0	0	0	0	0	0	0	0	1	0	0	0	0	0	0	0	0	0	0	64.1207	0
1366	0	0	50	0	0	1	0	0	0	0	0	0	1	0	0	0	0	0	0	0	0	1	0	0	44.4444	0
1367	1	1	50	0	0	0	0	0	0	0	0	0	0	0	0	0	0	0	0	0	0	1	0	0	66.1107	0
1368	1	1	50	0	0	1	0	0	0	0	0	0	0	1	0	0	0	0	0	0	0	1	0	0	85.7869	1
1369	0	1	50	0	0	0	0	0	0	0	0	0	0	0	1	0	0	0	0	0	0	1	0	0	44.4444	0
1370	1	1	50	0	0	1	0	0	0	0	0	1	0	0	0	0	0	0	0	0	0	1	0	0	97.2197	1
1371	1	0	50	0	0	0	0	0	0	0	0	1	0	0	1	0	0	0	0	0	0	1	0	0	97.2197	1
1372	0	1	50	0	0	0	0	0	0	0	0	0	0	0	0	0	0	0	0	0	0	1	0	0	44.4444	0
1373	1	1	50	0	0	1	0	0	1	0	0	0	0	0	0	0	0	0	0	0	0	0	0	0	66.1107	0
1374	0	0	50	0	0	0	0	0	0	0	0	0	0	0	1	0	0	0	0	0	0	0	0	0	44.4444	0
1375	0	1	50	0	0	0	0	0	0	0	0	0	0	0	0	0	0	0	0	0	0	0	0	0	44.4444	0
1376	0	1	50	0	0	0	0	1	1	0	0	0	0	1	0	0	0	0	0	0	0	1	0	0	102.294	1
1377	0	1	50	1	1	0	0	0	0	0	0	0	0	0	0	0	0	0	0	0	0	1	0	0	65.6682	0
1378	0	0	50	0	0	0	0	0	0	0	0	0	0	0	0	0	0	0	0	0	0	0	0	0	44.4444	0
1379	0	1	50	0	0	0	0	0	0	0	0	0	1	0	0	0	0	0	0	0	0	0	0	0	44.4444	0
1380	0	0	50	1	1	0	1	0	0	0	0	0	0	0	0	0	0	0	0	0	0	1	1	0	79.8211	1
1381	0	1	50	1	1	0	1	0	0	0	0	0	0	1	1	0	0	0	0	0	0	1	1	0	99.4973	1
1382	0	1	50	0	0	1	0	0	0	0	0	0	1	0	0	0	0	0	0	0	1	0	0	0	44.4444	0
1383	0	0	50	0	0	0	0	0	0	0	0	0	0	0	0	0	0	0	0	0	0	0	0	0	44.4444	0
1384	0	1	50	0	0	0	0	0	0	0	0	0	0	0	0	0	0	0	0	0	0	0	0	0	44.4444	0
1385	0	0	50	0	0	0	0	0	0	0	0	0	0	0	0	0	0	0	0	0	0	1	0	0	44.4444	0
1386	0	0	50	0	0	1	0	0	0	0	1	0	0	0	1	0	0	0	0	0	0	1	0	0	44.4444	0
1387	0	0	50	0	0	0	0	0	0	0	0	0	0	0	0	0	0	0	0	0	0	0	0	0	44.4444	0
1388	0	1	50	0	0	0	0	0	0	0	0	0	1	0	0	0	0	0	0	0	0	1	0	0	44.4444	0
1389	0	1	50	0	0	0	0	0	0	0	0	0	0	0	0	0	0	0	0	0	0	0	0	0	44.4444	0
1390	0	1	50	0	0	0	0	0	0	0	0	0	0	0	0	0	0	0	0	0	0	0	0	0	44.4444	0
1391	0	1	50	0	0	0	0	0	0	0	0	0	0	0	0	0	0	0	0	0	0	0	0	0	44.4444	0
1392	0	1	50	0	0	0	0	0	0	0	0	0	0	1	0	0	0	0	0	0	0	0	0	0	64.1207	0
1393	0	1	50	0	0	0	0	0	0	0	0	0	1	0	0	0	0	0	0	0	0	0	0	0	44.4444	0
1394	0	1	50	0	0	0	0	0	0	0	0	0	0	0	0	0	0	0	0	0	0	0	0	0	44.4444	0
1395	0	1	50	0	0	0	0	0	0	0	0	0	0	0	0	0	0	0	0	0	0	0	0	0	44.4444	0
1396	0	1	50	0	0	0	0	0	0	0	0	0	0	0	0	0	0	0	0	0	0	1	0	0	44.4444	0
1397	0	1	50	0	0	0	0	0	0	0	0	0	0	0	0	0	0	0	0	0	0	0	0	0	44.4444	0
1398	0	1	50	0	0	1	0	0	0	0	0	0	0	0	0	0	0	0	0	0	0	1	0	0	44.4444	0
1399	1	0	50	0	0	0	0	0	0	0	0	0	1	0	0	0	0	0	0	0	0	0	0	0	66.1107	0
1400	1	0	50	0	0	0	0	0	0	0	0	0	0	0	0	0	0	0	0	0	0	1	0	0	66.1107	0
1401	1	1	50	0	0	0	0	0	0	0	0	0	0	0	0	0	0	0	0	0	0	1	0	0	66.1107	0
1402	1	1	50	0	0	0	0	0	1	0	0	0	0	1	0	0	0	0	0	0	0	0	0	0	85.7869	1
1403	1	0	51	0	0	0	0	0	0	0	0	0	0	1	0	0	0	0	0	0	0	0	0	0	86.898	1
1404	0	1	51	0	0	0	0	0	0	0	0	0	0	0	0	0	0	0	0	0	0	0	0	0	45.5555	0
1405	1	0	51	0	1	0	0	0	0	0	0	0	1	0	0	0	0	0	0	0	0	0	0	0	67.2218	0
1406	1	0	51	0	0	0	0	0	0	0	0	1	0	1	0	0	0	0	0	0	0	0	0	0	118.007	1
1407	1	0	51	0	0	0	0	0	0	0	0	0	0	0	0	0	0	0	0	0	0	1	0	0	67.2218	0
1408	1	0	51	0	0	0	0	0	0	0	1	0	0	1	0	0	0	0	0	0	0	1	0	0	86.898	1
1409	0	1	51	0	1	0	0	0	0	0	0	0	0	0	0	0	0	0	0	0	0	0	0	0	45.5555	0
1410	0	1	51	0	0	0	0	0	0	0	0	0	0	0	0	0	0	0	0	0	0	0	0	0	45.5555	0
1411	0	1	51	0	0	0	0	0	0	0	0	0	0	0	0	0	0	0	0	0	0	1	0	0	45.5555	0
1412	0	1	51	0	0	0	0	0	0	0	0	0	1	0	0	0	0	0	0	0	0	1	0	0	45.5555	0
1413	0	1	51	0	0	0	0	0	0	0	0	0	0	0	0	0	0	0	0	0	0	1	0	0	45.5555	0
1414	0	0	51	0	0	0	0	0	0	0	0	0	0	0	0	0	0	0	0	0	0	1	0	0	45.5555	0
1415	0	1	51	1	1	0	1	0	0	0	0	0	0	0	0	0	0	0	0	0	0	0	0	0	80.9322	1
1416	0	1	51	0	0	0	0	0	0	0	0	0	0	0	0	0	0	0	0	0	0	1	0	0	45.5555	0
1417	1	1	51	0	0	0	0	0	0	0	0	1	0	0	0	0	0	0	0	0	0	1	1	0	98.3308	1
1418	1	1	51	0	0	1	0	0	0	0	0	0	0	0	0	0	0	0	0	0	0	1	0	0	67.2218	0
1419	1	1	51	0	0	0	0	0	0	0	0	0	1	0	1	0	0	0	0	0	0	1	0	0	67.2218	0
1420	1	1	51	0	0	0	0	0	0	0	0	0	0	0	0	0	0	0	0	0	0	0	0	0	67.2218	0
1421	1	1	51	0	0	1	0	0	1	0	0	0	0	0	0	0	0	0	0	0	0	1	1	0	67.2218	0
1422	1	0	51	0	0	0	0	0	0	0	0	0	0	0	0	0	0	0	0	0	0	0	0	0	67.2218	0
1423	1	1	51	0	0	1	0	0	0	0	0	1	0	0	0	0	0	0	0	0	0	0	0	0	98.3308	1
1424	1	0	51	0	0	0	0	0	0	0	0	0	0	0	0	0	0	0	0	0	0	1	0	0	67.2218	0
1425	0	1	52	0	0	1	0	0	0	0	0	0	0	0	0	0	0	0	0	0	0	0	0	0	46.6667	0
1426	1	0	52	0	0	0	0	0	0	0	0	1	0	0	1	0	0	0	0	0	0	0	0	0	99.4419	1
1427	1	1	52	1	0	0	0	0	0	1	0	0	0	0	0	0	0	0	0	0	0	1	1	0	150.743	1
1428	1	1	52	0	0	1	1	1	1	0	0	0	0	0	0	0	0	0	0	0	0	1	1	0	120.659	1
1429	1	0	52	0	0	1	0	0	0	0	1	0	0	0	0	1	0	0	0	0	0	0	0	0	68.3329	0
1430	1	0	52	0	0	0	0	0	0	0	0	0	0	0	0	0	0	0	0	0	0	1	1	0	68.3329	0
1431	1	0	52	0	0	0	0	0	0	0	0	0	0	0	0	0	0	0	0	0	0	1	0	0	68.3329	0
1432	1	1	52	0	0	0	0	0	1	1	0	0	0	0	1	0	0	0	0	0	0	1	0	0	129.519	1
1433	0	1	52	0	0	0	0	0	1	0	0	0	0	1	1	0	0	0	0	0	0	0	0	0	66.3429	0
1434	0	1	52	0	0	0	0	0	0	0	0	0	0	0	0	0	0	0	0	0	0	1	0	0	46.6667	0
1435	0	0	52	0	0	0	0	0	0	0	0	0	1	1	0	0	0	0	0	0	0	0	0	0	66.3429	0
1436	0	0	52	0	0	0	0	0	0	0	0	0	0	0	0	0	0	0	0	0	0	0	0	0	46.6667	0
1437	0	0	52	0	0	1	0	0	0	0	0	0	0	0	0	0	0	0	0	0	0	1	0	0	46.6667	0
1438	0	0	52	0	0	0	0	0	0	0	0	0	0	0	0	0	0	0	0	0	0	0	0	0	46.6667	0
1439	0	0	52	0	0	0	0	0	0	0	0	0	0	0	0	0	0	0	0	0	0	1	0	0	46.6667	0
1440	0	1	52	0	0	0	0	0	0	0	0	0	1	0	0	0	0	0	0	0	0	0	0	0	46.6667	0
1441	0	0	52	0	0	0	0	0	0	0	0	0	0	0	0	0	0	0	0	0	0	0	0	0	46.6667	0
1442	0	1	52	0	0	0	0	0	0	0	0	0	0	0	0	0	0	0	0	0	0	1	0	0	46.6667	0
1443	0	1	52	0	0	0	0	0	0	0	0	0	0	0	0	0	0	0	0	0	0	0	0	0	46.6667	0
1444	0	1	52	0	0	0	0	0	0	0	0	0	0	1	0	0	0	0	0	0	0	1	1	0	66.3429	0
1445	0	1	52	1	1	0	1	0	1	0	0	0	0	0	0	0	0	0	0	0	0	1	0	0	82.0433	1
1446	1	0	52	0	0	1	0	0	0	0	0	0	0	0	0	0	0	0	0	0	0	0	0	0	68.3329	0
1447	1	0	52	0	0	0	0	0	0	0	0	0	0	0	0	0	0	0	0	0	0	1	0	0	68.3329	0
1448	1	0	52	0	0	0	0	0	0	0	0	0	0	0	0	0	0	0	0	0	0	0	0	0	68.3329	0
1449	1	0	52	0	0	1	0	0	0	0	0	0	0	0	0	0	0	0	0	0	0	0	0	0	68.3329	0
1450	1	1	53	0	0	1	0	0	0	0	0	0	0	0	0	0	0	0	0	0	0	0	0	0	69.444	0
1451	0	1	53	0	0	0	0	0	0	0	0	0	0	0	0	0	0	0	0	0	0	0	0	0	47.7778	0
1452	1	0	53	0	0	0	0	0	0	0	1	0	0	0	0	0	0	0	0	0	0	0	0	0	69.444	0
1453	1	0	53	0	0	0	0	0	0	0	0	0	1	0	0	0	0	0	0	0	0	1	0	0	69.444	0
1454	1	0	53	0	1	0	0	0	0	0	0	0	0	0	0	0	0	0	0	0	0	0	0	0	69.444	0
1455	1	0	53	1	0	0	0	0	0	0	0	1	0	1	0	0	0	0	0	0	0	1	1	0	141.453	1
1456	1	1	53	0	0	1	0	0	0	0	0	0	0	0	0	0	0	0	0	0	0	0	0	0	69.444	0
1457	1	1	53	0	0	0	0	0	0	0	0	0	0	1	0	0	0	0	0	0	0	1	0	0	89.1202	1
1458	1	0	53	0	0	1	0	0	0	0	0	0	0	0	0	0	0	0	0	0	0	1	0	0	69.444	0
1459	1	1	53	0	0	0	0	0	0	0	0	0	0	0	0	0	0	0	0	0	0	1	0	0	69.444	0
1460	1	1	53	0	0	0	0	0	0	0	0	0	0	0	0	0	0	0	0	0	0	0	0	0	69.444	0
1461	1	0	53	1	1	0	1	0	0	0	1	0	0	0	0	0	0	0	0	0	0	0	0	0	104.821	1
1462	1	0	53	0	0	0	0	0	0	0	0	0	0	0	0	0	0	0	0	0	0	0	0	0	69.444	0
1463	1	1	53	0	0	0	0	0	0	0	0	0	0	0	0	0	0	0	0	0	0	0	0	0	69.444	0
1464	1	0	53	0	0	0	0	0	0	0	0	0	0	1	0	0	0	0	0	0	0	1	0	0	89.1202	1
1465	0	1	53	0	0	0	0	0	0	0	0	0	0	0	0	0	0	0	0	0	0	1	0	0	47.7778	0
1466	0	1	53	0	0	1	0	0	0	0	0	0	0	0	1	0	0	0	0	0	0	1	0	0	47.7778	0
1467	0	0	53	0	0	0	0	0	0	0	0	0	0	0	0	0	0	0	0	0	0	0	0	0	47.7778	0
1468	0	1	53	1	1	0	0	0	0	0	0	0	0	1	0	0	0	0	0	0	0	1	0	0	88.6778	1
1469	0	1	53	0	0	1	0	0	0	0	0	0	0	1	0	0	0	0	0	0	0	1	0	0	67.454	0
1470	0	1	53	0	1	0	0	0	0	0	0	0	0	1	1	0	0	1	0	0	0	1	0	0	67.454	0
1471	0	1	53	0	0	0	0	0	0	0	0	0	0	0	0	0	0	0	0	0	0	1	0	0	47.7778	0
1472	0	0	53	0	0	0	0	0	0	0	0	0	0	0	1	0	0	0	0	0	0	1	1	0	47.7778	0
1473	1	0	53	0	0	0	0	0	0	0	0	0	0	1	0	0	0	0	0	0	0	1	0	0	89.1202	1
1474	1	1	53	0	0	0	0	0	0	0	0	0	0	0	0	0	0	0	0	0	0	1	1	0	69.444	0
1475	1	0	53	0	0	1	0	0	0	0	0	0	0	0	0	0	0	0	0	0	0	1	0	0	69.444	0
1476	1	0	53	0	0	1	0	0	0	0	0	0	0	0	0	0	0	0	0	0	0	1	0	0	69.444	0
1477	1	0	53	0	0	0	0	0	0	0	0	0	0	0	1	0	0	0	0	0	0	1	1	0	69.444	0
1478	1	0	53	0	0	0	0	0	0	0	0	0	0	0	0	0	0	0	0	0	0	1	1	0	69.444	0
1479	1	0	53	0	0	0	0	0	0	0	0	0	0	0	0	0	0	0	1	0	0	1	1	0	106.384	1
1480	1	0	53	0	0	0	0	0	0	0	0	0	0	0	0	0	0	0	0	0	0	1	0	0	69.444	0
1481	1	1	53	1	1	0	1	0	0	0	0	0	0	0	0	0	0	0	0	0	0	1	0	0	104.821	1
1482	1	1	53	0	0	1	0	0	0	0	0	0	0	0	0	0	0	0	0	0	0	0	0	0	69.444	0
1483	1	0	54	0	0	0	0	0	0	0	0	0	0	0	0	0	0	0	0	0	0	1	0	0	70.5551	0
1484	1	0	54	0	0	1	0	0	0	0	0	0	0	0	0	0	0	0	0	0	0	0	0	0	70.5551	0
1485	1	1	54	0	0	1	0	0	0	0	0	0	0	0	0	0	0	0	0	0	0	0	0	0	70.5551	0
1486	1	0	54	0	0	0	0	0	0	0	0	0	0	0	0	0	0	0	0	0	0	0	0	0	70.5551	0
1487	1	0	54	0	0	1	0	0	0	0	0	0	0	1	0	0	0	0	0	0	0	0	0	0	90.2313	1
1488	1	0	54	1	0	0	0	0	1	0	0	0	0	1	0	0	0	0	0	0	0	1	0	0	111.455	1
1489	1	0	54	0	0	1	0	0	0	0	0	0	0	0	0	0	0	0	0	0	0	1	0	0	70.5551	0
1490	1	1	54	0	0	0	0	0	0	0	0	0	0	0	1	0	0	0	0	0	0	1	0	0	70.5551	0
1491	1	0	54	0	0	0	0	0	0	0	0	0	0	0	1	0	0	0	0	0	0	1	0	0	70.5551	0
1492	0	1	54	0	0	0	0	0	0	0	0	0	0	0	0	0	0	0	0	0	0	0	0	0	48.8889	0
1493	0	0	54	0	0	0	0	0	0	0	0	0	0	0	0	0	0	0	0	0	0	0	0	0	48.8889	0
1494	0	1	54	0	0	0	0	0	0	0	0	0	0	0	0	0	0	0	0	0	0	0	0	0	48.8889	0
1495	0	1	54	0	1	0	0	0	0	0	0	1	0	0	0	0	0	0	0	0	0	0	0	0	79.9979	1
1496	0	1	54	0	0	0	0	0	0	0	0	0	0	0	1	0	0	0	0	0	0	1	0	0	48.8889	0
1497	0	0	54	0	1	0	0	0	0	0	0	0	0	0	0	0	0	0	0	0	0	1	0	0	48.8889	0
1498	0	0	54	0	0	0	0	0	0	0	0	0	0	0	0	0	0	0	0	0	0	1	0	0	48.8889	0
1499	0	1	54	0	0	0	0	0	0	0	0	0	0	0	1	0	0	0	0	0	0	0	0	0	48.8889	0
1500	0	1	54	0	0	1	0	0	0	0	0	0	0	0	0	0	0	0	0	0	0	0	0	0	48.8889	0
1501	0	1	54	0	0	1	0	0	0	0	0	0	0	1	0	0	0	0	0	0	0	0	0	0	68.5651	0
1502	0	1	54	0	0	0	0	0	0	0	0	0	0	0	0	0	0	0	0	0	0	0	0	0	48.8889	0
1503	0	0	54	0	0	0	0	0	0	0	0	0	0	1	0	0	0	0	0	0	0	1	0	0	68.5651	0
1504	0	1	54	0	0	0	0	0	0	0	0	0	0	0	0	0	0	0	0	0	0	1	1	0	48.8889	0
1505	0	0	54	0	0	0	0	0	0	0	0	0	0	0	0	0	0	0	0	0	0	0	0	0	48.8889	0
1506	0	0	54	0	0	0	0	0	0	0	0	0	0	0	0	0	0	0	0	0	0	1	1	0	48.8889	0
1507	0	1	54	0	0	0	0	0	0	0	0	0	0	0	0	0	0	0	0	0	0	0	0	0	48.8889	0
1508	0	1	54	0	0	0	0	1	1	0	0	1	0	0	0	0	0	0	0	0	0	1	1	0	118.171	1
1509	1	1	54	1	1	0	1	0	1	0	0	0	0	0	0	0	0	0	0	0	0	0	0	0	105.932	1
1510	1	1	54	1	0	0	0	0	0	0	0	0	0	0	0	0	0	0	0	0	0	0	0	0	91.7789	1
1511	1	0	54	0	0	1	0	0	0	0	0	0	1	0	0	0	0	0	0	0	0	0	0	0	70.5551	0
1512	1	1	54	0	0	1	0	0	0	0	0	0	0	0	0	0	0	0	0	0	0	1	0	0	70.5551	0
1513	1	0	54	0	0	0	0	0	0	0	0	0	0	0	0	0	0	0	0	0	0	1	0	0	70.5551	0
1514	1	0	55	0	0	1	0	0	0	0	0	0	0	0	0	0	0	0	0	0	0	1	0	0	71.6662	0
1515	1	1	55	0	0	0	0	0	0	0	0	0	0	0	0	0	0	0	0	0	0	0	0	0	71.6662	0
1516	1	0	55	0	1	0	0	0	0	0	0	0	0	0	0	0	0	0	0	0	0	1	0	0	71.6662	0
1517	1	0	55	1	0	0	0	0	0	0	0	0	0	1	0	0	0	0	0	0	0	0	0	0	112.566	1
1518	0	1	55	0	1	0	0	0	0	0	0	0	0	0	0	0	0	0	0	0	0	0	0	0	50	0
1519	1	1	55	0	0	0	0	0	0	0	0	0	0	0	0	0	0	0	0	0	0	0	0	0	71.6662	0
1520	1	1	55	0	0	0	0	0	0	0	0	0	0	0	0	0	0	0	0	0	0	1	0	0	71.6662	0
1521	1	1	55	0	0	1	0	0	0	0	0	0	0	0	0	0	0	0	0	0	0	1	0	0	71.6662	0
1522	0	1	55	0	0	0	0	0	0	0	0	0	0	0	0	0	0	0	0	0	0	0	0	0	50	0
1523	1	1	55	0	0	0	0	0	0	0	0	0	0	0	0	0	0	0	0	0	0	1	0	0	71.6662	0
1524	1	0	55	0	0	0	0	0	0	0	0	0	0	0	0	0	0	0	0	0	0	0	0	0	71.6662	0
1525	1	0	55	0	0	0	0	0	0	0	0	0	0	0	0	0	0	0	0	0	0	0	0	0	71.6662	0
1526	0	1	55	0	0	0	0	1	1	1	0	0	0	0	0	0	0	0	0	0	0	1	0	0	149.359	1
1527	0	1	55	0	0	0	0	0	0	0	0	0	0	0	0	0	0	0	0	0	0	0	0	0	50	0
1528	0	1	55	0	0	0	0	0	0	0	0	0	1	0	0	0	0	0	0	0	0	1	0	0	50	0
1529	0	1	55	0	0	0	0	0	0	0	0	0	0	0	1	0	0	0	0	0	0	1	0	0	50	0
1530	0	1	55	0	0	0	0	0	0	0	0	0	0	0	0	0	0	0	0	0	0	1	0	0	50	0
1531	0	1	55	0	0	0	0	0	0	0	0	0	0	0	0	0	0	0	0	0	0	0	0	0	50	0
1532	0	1	55	0	0	0	0	0	0	0	0	0	0	0	0	0	0	0	0	0	0	0	0	0	50	0
1533	0	0	55	0	0	0	0	0	0	0	0	0	0	0	0	0	0	0	0	0	0	1	0	0	50	0
1534	0	0	55	0	0	0	0	0	0	0	0	0	0	0	0	0	0	0	0	0	0	0	0	0	50	0
1535	0	1	55	0	0	0	0	0	0	0	0	0	0	1	0	0	0	0	0	0	0	0	0	0	69.6762	0
1536	0	1	55	0	0	0	0	0	0	0	0	0	0	0	1	0	0	0	0	0	0	1	0	0	50	0
1537	0	1	55	0	0	0	0	0	0	0	0	0	0	0	1	1	0	0	0	0	0	1	1	0	50	0
1538	0	1	55	0	0	0	0	0	0	0	0	0	0	0	0	0	0	0	0	0	0	0	0	0	50	0
1539	0	1	55	0	0	0	0	0	0	0	0	0	0	0	0	0	0	0	0	0	0	0	0	0	50	0
1540	0	1	55	0	0	1	0	0	0	0	0	0	0	0	0	0	0	0	0	0	0	1	0	0	50	0
1541	1	1	55	0	0	1	0	0	0	0	0	0	0	0	0	0	0	0	0	0	0	0	0	0	71.6662	0
1542	1	1	55	0	0	0	0	0	0	0	0	0	0	0	0	0	0	0	0	0	0	1	0	0	71.6662	0
1543	1	0	55	0	0	0	0	0	0	0	0	0	0	0	0	0	0	0	0	0	0	0	0	0	71.6662	0
1544	1	0	55	0	0	0	0	0	0	0	0	0	0	0	0	0	0	0	0	0	0	0	0	0	71.6662	0
1545	1	1	55	0	0	0	0	0	0	0	0	0	0	0	1	0	0	0	0	0	0	1	0	0	71.6662	0
1546	1	1	55	0	0	0	0	0	0	0	0	0	0	0	0	0	0	0	0	0	0	1	0	0	71.6662	0
1547	1	1	55	0	0	0	0	0	0	0	0	0	0	0	0	0	0	0	0	0	0	1	0	0	71.6662	0
1548	1	1	56	0	0	0	0	0	0	0	0	1	0	0	0	0	0	0	0	0	0	1	0	0	103.886	1
1549	0	1	56	0	0	1	0	0	0	0	1	0	0	0	0	0	0	0	0	0	0	0	0	0	51.1111	0
1550	0	1	56	0	0	1	0	0	0	0	0	0	0	0	0	0	0	0	0	0	0	1	0	0	51.1111	0
1551	1	0	56	1	1	0	1	0	0	0	0	0	0	0	0	0	0	0	0	0	0	1	0	0	108.154	1
1552	1	0	56	0	0	1	0	0	0	0	0	0	0	0	0	0	0	0	0	0	0	1	1	0	72.7773	0
1553	0	1	56	0	0	0	0	0	0	0	0	0	0	0	0	0	0	0	0	0	0	0	0	0	51.1111	0
1554	1	0	56	0	0	0	0	0	0	0	0	0	0	1	0	0	0	0	0	0	0	1	0	0	92.4536	1
1555	1	1	56	0	0	0	0	0	0	0	0	0	0	0	0	0	0	0	0	0	0	0	0	0	72.7773	0
1556	1	0	56	0	0	0	0	0	0	0	0	0	0	0	0	0	0	0	0	0	0	1	0	0	72.7773	0
1557	1	0	56	0	0	0	0	0	0	0	0	0	0	0	0	0	0	0	0	0	0	1	0	0	72.7773	0
1558	1	1	56	0	0	0	0	0	0	0	0	1	0	0	0	0	0	0	0	0	0	0	0	0	103.886	1
1559	1	0	56	0	0	0	0	0	0	0	0	0	0	1	0	0	0	0	0	0	0	1	0	0	92.4536	1
1560	1	0	56	0	0	0	0	0	0	0	0	0	0	0	0	0	0	0	0	0	0	1	0	0	72.7773	0
1561	1	1	56	1	1	0	1	0	0	0	0	0	0	0	0	0	0	0	0	0	0	1	1	0	108.154	1
1562	0	0	56	0	0	0	0	0	0	0	0	0	0	0	0	0	0	0	0	0	0	1	0	0	51.1111	0
1563	0	1	56	0	0	0	0	0	0	0	0	0	0	0	0	0	0	0	1	0	0	1	1	0	88.0516	1
1564	0	1	56	0	0	0	0	0	0	0	0	1	0	0	0	0	0	0	1	0	0	0	0	0	119.161	1
1565	0	1	56	0	1	0	0	0	0	0	0	0	0	1	0	0	0	0	1	0	0	1	0	0	107.728	1
1566	0	1	56	0	0	0	0	0	0	0	1	0	0	1	0	1	0	0	0	0	0	1	0	0	70.7873	0
1567	0	1	56	0	0	0	0	0	0	0	0	0	0	0	0	0	0	0	0	0	0	0	0	0	51.1111	0
1568	0	1	56	0	0	0	0	0	0	0	0	0	0	0	0	0	0	0	0	0	0	0	0	0	51.1111	0
1569	0	1	56	0	0	0	0	0	0	1	0	0	0	0	0	0	0	0	0	0	0	1	1	0	112.297	1
1570	0	1	56	0	0	0	0	0	0	0	0	0	0	0	0	0	0	0	0	0	0	1	0	0	51.1111	0
1571	0	1	56	0	0	0	0	0	0	0	0	0	0	0	0	0	0	0	0	0	0	0	0	0	51.1111	0
1572	0	1	56	0	0	0	0	0	0	0	0	0	0	1	0	0	0	0	0	0	0	1	0	0	70.7873	0
1573	0	1	56	0	0	0	0	0	0	0	0	0	0	0	0	0	0	0	0	0	0	1	0	0	51.1111	0
1574	1	1	56	0	0	1	0	0	0	0	0	0	0	0	0	0	0	0	0	0	0	0	0	0	72.7773	0
1575	1	0	56	0	0	1	0	0	0	0	0	0	0	1	0	0	0	0	0	0	0	1	0	0	92.4536	1
1576	1	0	56	0	0	0	0	0	0	0	0	0	0	1	0	0	0	0	0	0	0	1	0	0	92.4536	1
1577	1	1	56	0	0	0	0	0	0	0	0	0	1	0	0	0	0	0	0	0	0	0	0	0	72.7773	0
1578	1	1	57	0	0	0	0	0	0	0	0	0	0	0	0	0	0	0	0	0	1	0	0	0	73.8884	0
1579	1	0	57	0	0	0	0	0	0	0	0	0	0	0	0	0	0	0	0	0	0	1	0	0	73.8884	0
1580	1	1	57	0	0	1	0	0	0	0	0	0	0	0	0	0	0	0	0	0	0	0	0	0	73.8884	0
1581	1	1	57	0	0	0	0	0	0	0	0	0	0	0	0	0	0	0	0	0	0	1	0	0	73.8884	0
1582	1	0	57	0	0	0	0	0	0	0	0	0	0	0	0	0	0	0	1	0	0	1	0	0	110.829	1
1583	1	1	57	0	0	0	0	0	0	0	0	0	0	0	0	0	0	0	0	0	0	0	0	0	73.8884	0
1584	1	1	57	0	0	0	0	0	0	0	0	0	0	0	0	0	0	1	0	0	1	1	1	0	73.8884	0
1585	0	1	57	0	0	1	0	0	0	0	0	0	0	0	0	0	0	0	0	0	0	1	0	0	52.2222	0
1586	1	1	57	0	0	0	0	0	0	0	0	0	0	0	1	0	0	0	0	0	0	1	1	0	73.8884	0
1587	1	0	57	0	0	0	0	0	0	0	0	1	0	0	0	0	0	0	0	0	0	0	0	0	104.997	1
1588	1	1	57	0	0	0	0	0	0	0	0	0	0	0	0	0	0	0	0	0	0	0	0	0	73.8884	0
1589	0	1	57	0	1	0	0	0	0	0	0	0	0	1	0	0	0	0	0	0	0	0	0	0	71.8984	0
1590	0	1	57	0	0	0	0	0	0	0	0	0	0	0	0	0	0	0	0	0	0	1	0	0	52.2222	0
1591	1	0	57	0	0	0	0	0	0	0	0	0	0	1	0	0	0	0	0	0	0	1	0	0	93.5647	1
1592	1	0	57	0	0	0	0	0	0	0	0	0	0	0	0	0	0	0	0	0	0	0	0	0	73.8884	0
1593	0	1	57	0	0	1	0	0	0	0	0	0	0	0	1	0	0	0	0	0	0	0	0	0	52.2222	0
1594	0	1	57	0	0	1	0	0	0	0	0	0	0	0	0	0	0	0	0	0	0	1	0	0	52.2222	0
1595	0	1	57	0	0	0	0	0	0	1	0	0	0	0	0	0	0	1	0	0	0	1	1	0	113.408	1
1596	0	1	57	0	1	0	1	0	0	0	0	0	0	0	0	0	0	0	0	0	0	0	0	0	66.3751	0
1597	0	1	57	1	1	0	0	0	0	0	0	0	0	1	0	0	0	0	0	0	0	1	1	0	93.1222	1
1598	0	1	57	0	0	0	0	0	0	0	0	0	0	0	0	0	0	0	0	0	0	1	0	0	52.2222	0
1599	0	1	57	0	0	0	0	0	0	0	0	0	0	0	0	0	0	0	0	0	0	0	0	0	52.2222	0
1600	0	1	57	0	0	0	0	0	0	0	0	0	0	0	1	0	0	0	0	0	0	1	0	0	52.2222	0
1601	0	0	57	0	0	0	0	0	0	0	0	0	0	0	0	0	0	0	0	0	0	1	0	0	52.2222	0
1602	0	1	57	0	0	0	0	0	0	0	0	0	0	0	0	0	0	0	0	0	0	0	0	0	52.2222	0
1603	0	0	57	0	1	0	0	0	0	0	0	0	0	1	0	0	0	0	0	0	0	0	0	0	71.8984	0
1604	1	0	57	0	0	1	0	0	0	0	0	0	0	1	0	0	0	0	0	0	0	1	0	0	93.5647	1
1605	1	0	57	0	0	1	0	0	0	0	0	0	0	0	0	0	0	0	0	0	0	0	0	0	73.8884	0
1606	1	0	57	0	0	0	0	0	0	0	0	0	0	0	0	0	0	0	0	0	0	0	0	0	73.8884	0
1607	1	0	57	0	0	0	1	0	0	0	0	0	0	0	0	0	0	0	0	0	0	0	0	0	88.0413	1
1608	1	1	57	0	0	1	0	0	0	0	0	0	0	0	0	0	0	0	0	0	0	0	0	0	73.8884	0
1609	1	1	57	1	1	0	1	1	1	0	0	1	0	1	0	1	0	0	0	0	0	1	1	0	198.223	1
1610	0	1	58	0	0	0	0	0	0	0	0	0	0	0	0	0	0	0	0	0	0	1	1	0	53.3333	0
1611	0	1	58	0	0	0	0	0	0	0	0	0	0	0	0	0	0	1	0	0	0	0	0	0	53.3333	0
1612	1	1	58	0	0	0	0	0	0	0	0	1	0	0	0	0	0	0	0	0	0	0	0	0	106.109	1
1613	1	0	58	0	0	1	0	0	0	0	0	0	0	0	0	0	0	0	0	0	0	1	0	0	74.9995	0
1614	1	0	58	0	0	0	0	0	0	0	0	0	0	0	0	0	0	0	0	0	0	0	0	0	74.9995	0
1615	1	0	58	0	0	0	0	0	0	0	0	0	0	0	0	0	0	0	0	0	0	1	0	0	74.9995	0
1616	1	0	58	0	0	0	0	0	0	0	0	0	1	0	0	0	0	0	0	0	0	1	0	0	74.9995	0
1617	1	0	58	0	0	0	0	0	0	0	0	0	0	0	0	0	0	0	0	0	0	1	1	0	74.9995	0
1618	1	1	58	0	0	0	0	0	0	0	0	0	0	0	1	0	0	1	0	0	0	0	0	0	74.9995	0
1619	1	1	58	1	1	0	1	0	0	0	0	0	0	0	0	0	0	0	0	0	0	1	0	0	110.376	1
1620	1	1	58	0	0	1	0	0	0	0	0	0	0	0	0	0	0	0	1	0	0	0	0	0	111.94	1
1621	0	1	58	0	0	0	0	0	0	0	0	0	0	1	0	0	0	0	0	0	0	1	1	0	73.0096	0
1622	0	1	58	0	0	0	0	0	0	0	0	0	1	1	0	0	0	0	0	0	0	1	0	0	73.0096	0
1623	0	0	58	0	0	0	0	0	0	0	0	0	0	1	0	0	0	0	0	0	0	1	0	0	73.0096	0
1624	0	1	58	1	1	0	1	0	0	0	0	0	0	0	0	0	0	0	0	0	0	1	0	0	88.71	1
1625	1	1	58	0	0	0	0	0	0	0	0	0	0	0	0	0	0	0	0	0	0	1	0	0	74.9995	0
1626	1	0	58	0	0	0	0	0	0	0	0	0	0	0	0	0	0	0	0	0	0	1	0	0	74.9995	0
1627	1	0	58	0	0	1	0	0	0	0	0	0	0	0	0	0	0	0	0	0	0	1	0	0	74.9995	0
1628	1	1	58	0	0	0	0	0	0	0	0	0	0	0	1	0	0	0	0	0	0	1	0	0	74.9995	0
1629	1	1	58	0	0	0	0	0	0	0	0	0	0	0	0	0	0	0	0	0	0	0	0	0	74.9995	0
1630	1	1	58	0	0	0	0	0	0	0	0	0	0	0	0	0	0	0	0	0	0	1	1	0	74.9995	0
1631	1	0	58	0	0	0	0	0	0	0	0	0	0	0	0	0	0	0	0	0	0	0	0	0	74.9995	0
1632	1	1	58	0	0	1	0	1	1	0	0	0	0	0	0	0	0	0	0	0	0	1	0	0	113.172	1
1633	1	0	58	0	0	0	0	0	0	0	0	0	0	0	0	0	0	0	0	0	0	1	0	0	74.9995	0
1634	1	1	58	0	0	0	0	0	0	0	0	0	0	0	0	0	0	0	0	0	0	0	0	0	74.9995	0
1635	1	0	59	0	0	1	0	0	0	0	0	0	1	1	0	0	0	0	0	0	0	0	0	0	95.7869	1
1636	1	0	59	0	0	0	0	0	0	0	0	0	0	0	0	0	0	0	0	0	0	1	0	0	76.1107	1
1637	1	1	59	0	0	0	0	0	0	0	0	0	1	1	0	0	0	0	0	0	0	0	0	0	95.7869	1
1638	1	1	59	0	0	0	0	0	0	0	0	0	0	1	0	0	0	0	0	0	0	1	0	0	95.7869	1
1639	0	1	59	0	0	0	0	0	0	0	0	0	0	0	0	0	0	0	0	0	0	0	0	0	54.4444	0
1640	1	0	59	0	0	0	0	0	0	0	0	1	0	0	0	0	0	0	0	0	0	1	1	0	107.22	1
1641	1	1	59	0	0	0	0	0	0	0	0	0	0	1	0	0	0	0	0	0	0	0	0	0	95.7869	1
1642	1	1	59	0	0	0	0	0	0	0	0	0	0	0	0	0	0	0	0	0	0	1	0	0	76.1107	1
1643	0	1	59	0	0	0	0	0	1	0	0	0	0	0	0	0	0	0	0	0	0	1	0	0	54.4444	0
1644	0	1	59	1	1	0	1	0	0	0	0	0	0	1	0	0	0	0	0	0	0	0	0	0	109.497	1
1645	0	0	59	0	0	0	0	0	0	0	0	0	0	0	0	0	0	0	0	0	0	0	0	0	54.4444	0
1646	0	1	59	0	0	0	0	0	0	0	0	0	0	0	0	0	0	0	0	0	0	0	0	0	54.4444	0
1647	0	1	59	0	0	0	0	0	0	0	0	0	0	0	0	0	0	0	0	0	0	1	0	0	54.4444	0
1648	0	0	59	0	0	0	0	0	0	0	0	0	0	0	0	0	0	0	0	0	1	1	0	0	54.4444	0
1649	1	0	59	0	0	1	0	0	0	0	0	0	0	1	0	0	0	0	0	0	0	1	0	0	95.7869	1
1650	1	1	59	1	1	0	1	0	0	0	0	0	0	1	0	0	0	1	0	0	0	0	0	0	131.164	1
1651	1	1	59	0	0	0	0	0	0	0	0	0	0	0	0	0	0	0	0	0	0	1	0	0	76.1107	1
1652	1	1	59	0	0	0	0	0	0	1	0	0	0	0	0	0	0	0	0	0	0	0	0	0	137.297	1
1653	1	0	59	0	0	0	0	0	0	0	0	0	0	0	0	0	0	0	0	0	0	1	0	0	76.1107	1
1654	1	1	60	1	1	0	1	0	0	0	0	1	0	1	0	0	0	0	1	0	0	0	0	0	200.324	1
1655	0	1	60	0	0	0	0	0	0	0	0	0	0	0	0	0	0	0	0	0	0	1	0	0	55.5555	0
1656	1	1	60	0	1	0	0	0	0	0	0	0	0	0	0	0	0	0	0	0	0	0	0	0	77.2218	1
1657	1	0	60	0	0	0	1	0	0	0	0	0	0	1	0	0	0	0	1	0	0	1	1	0	147.991	1
1658	1	0	60	0	0	1	0	0	0	0	0	0	0	0	0	0	0	0	0	0	0	1	0	0	77.2218	1
1659	1	1	60	0	0	0	0	0	0	0	0	0	0	1	0	0	0	0	0	0	0	1	0	0	96.898	1
1660	1	1	60	1	1	0	1	0	0	0	0	0	0	0	0	0	0	0	0	0	0	1	0	0	112.598	1
1661	1	1	60	0	0	0	0	0	0	0	0	0	0	0	0	0	0	0	0	0	0	1	1	0	77.2218	1
1662	1	1	60	0	0	0	0	0	0	0	0	0	0	0	0	0	0	0	0	0	0	0	0	0	77.2218	1
1663	1	0	60	0	0	0	0	0	0	0	0	0	0	0	0	0	0	0	0	0	0	0	0	0	77.2218	1
1664	1	0	60	0	0	0	0	0	0	0	0	0	0	1	0	0	0	0	0	0	0	1	0	0	96.898	1
1665	0	0	60	0	0	1	0	0	0	0	0	0	0	0	0	0	0	0	0	0	0	0	0	0	55.5555	0
1666	0	0	60	1	0	0	0	0	0	0	0	0	0	0	0	0	0	0	0	0	0	1	1	0	76.7793	1
1667	1	1	60	0	0	1	0	0	0	0	0	0	0	0	0	0	0	0	0	0	1	0	0	0	77.2218	1
1668	1	0	60	0	0	1	0	0	0	0	0	0	0	0	0	0	0	0	0	0	0	1	0	0	77.2218	1
1669	1	1	60	0	0	0	0	0	0	0	0	0	0	1	0	0	0	0	0	0	0	0	0	0	96.898	1
1670	1	0	60	0	0	1	0	0	0	0	0	0	0	0	0	0	0	0	0	0	0	1	0	0	77.2218	1
1671	1	0	60	0	0	1	0	0	0	0	0	0	0	0	0	0	0	0	0	0	0	0	0	0	77.2218	1
1672	1	1	60	0	0	0	0	0	0	0	0	0	0	0	0	0	0	0	0	0	0	0	0	0	77.2218	1
1673	1	1	61	0	0	0	0	0	0	0	0	0	0	0	0	0	0	0	0	0	0	1	0	0	78.3329	1
1674	0	1	61	0	0	0	0	0	0	0	0	0	0	0	0	0	0	0	0	0	0	1	1	0	56.6667	0
1675	1	1	61	0	1	0	0	0	0	0	0	0	0	0	0	0	0	0	0	0	0	1	0	0	78.3329	1
1676	1	0	61	0	0	0	0	0	0	0	0	0	0	0	0	0	0	0	0	0	0	1	0	0	78.3329	1
1677	1	0	61	0	0	0	0	0	0	0	0	0	0	1	0	0	0	0	0	0	0	0	0	0	98.0091	1
1678	1	0	61	0	0	0	0	0	0	0	0	0	0	0	0	0	0	0	0	0	0	0	0	0	78.3329	1
1679	1	0	61	0	0	0	0	0	0	0	0	0	0	0	1	0	0	0	0	0	0	0	0	0	78.3329	1
1680	1	1	61	0	0	1	0	0	0	0	0	0	0	0	0	0	0	0	0	0	0	0	0	0	78.3329	1
1681	1	1	61	0	0	0	0	0	0	0	0	0	0	0	0	0	0	0	0	0	0	0	0	0	78.3329	1
1682	1	0	61	0	0	1	0	0	0	0	0	0	0	0	0	0	0	0	0	0	0	0	0	0	78.3329	1
1683	1	0	61	0	0	0	0	0	0	0	0	0	0	1	0	0	0	0	0	0	0	0	0	0	98.0091	1
1684	1	0	61	0	1	0	0	0	0	0	0	0	1	0	0	0	0	0	0	0	0	1	1	0	78.3329	1
1685	0	1	61	1	0	0	0	0	0	0	0	0	0	0	1	0	0	0	0	0	0	1	1	0	77.8904	1
1686	1	1	61	0	0	0	0	0	0	0	0	0	0	0	0	0	0	0	0	0	0	0	0	0	78.3329	1
1687	1	0	61	0	0	0	0	0	0	0	0	1	0	0	0	0	0	0	1	0	0	1	1	0	146.382	1
1688	1	1	61	0	0	0	0	0	0	0	0	0	1	1	0	0	0	0	0	0	0	1	0	0	98.0091	1
1689	1	0	61	0	0	0	0	0	0	0	0	0	0	0	0	0	0	0	0	0	0	0	0	0	78.3329	1
1690	1	1	61	0	0	0	0	0	0	0	0	0	0	0	0	0	0	0	0	0	0	1	0	0	78.3329	1
1691	1	1	62	0	0	0	0	0	0	0	0	0	0	0	0	0	0	0	0	0	0	1	0	0	79.444	1
1692	1	1	62	0	0	1	0	0	0	0	0	0	0	0	1	0	0	0	0	0	0	1	0	0	79.444	1
1693	1	0	62	0	0	0	0	0	0	0	0	0	1	0	0	0	0	0	0	0	0	1	0	0	79.444	1
1694	1	0	62	0	0	1	0	0	0	0	0	0	0	0	1	0	0	0	0	0	0	0	0	0	79.444	1
1695	1	0	62	0	0	1	0	0	0	0	0	0	0	0	0	0	0	0	0	0	0	0	0	0	79.444	1
1696	1	0	62	0	0	0	0	0	0	0	0	0	0	0	0	0	0	0	0	0	0	1	0	0	79.444	1
1697	1	1	62	0	0	0	0	0	0	0	0	0	0	0	0	0	0	0	0	0	0	0	0	0	79.444	1
1698	1	0	62	0	0	0	0	0	0	0	0	0	0	0	0	0	0	0	0	0	0	0	0	0	79.444	1
1699	1	1	62	0	0	0	0	0	0	0	0	0	1	0	0	0	0	0	0	0	0	1	0	0	79.444	1
1700	1	0	62	0	0	0	0	0	0	0	0	0	0	1	0	0	0	0	0	0	0	1	0	0	99.1202	1
1701	1	0	62	0	0	0	0	0	0	0	0	0	0	0	0	0	0	0	0	0	0	0	0	0	79.444	1
1702	0	1	62	0	0	0	0	0	0	0	0	0	0	0	0	0	0	0	0	0	0	1	0	0	57.7778	0
1703	1	1	62	0	0	1	0	0	0	0	0	0	0	1	0	0	0	0	0	0	0	1	0	0	99.1202	1
1704	1	1	62	0	0	0	0	0	0	0	1	0	0	0	1	0	0	0	0	0	0	1	0	0	79.444	1
1705	1	0	62	0	1	0	0	0	0	0	0	0	0	0	0	0	0	0	0	0	0	1	0	0	79.444	1
1706	0	0	62	0	0	1	0	1	1	0	0	1	0	0	1	0	0	0	0	0	0	1	1	0	127.06	1
1707	1	1	62	0	0	0	0	0	0	0	0	0	0	0	0	0	0	0	0	0	0	1	1	0	79.444	1
1708	1	0	62	0	0	0	0	0	0	0	0	0	0	0	0	0	1	0	1	0	0	1	1	0	116.384	1
1709	1	1	62	0	0	1	0	0	0	0	0	0	0	0	0	0	0	0	0	0	0	0	0	0	79.444	1
1710	1	1	62	0	1	0	0	0	0	0	0	0	0	0	0	0	0	0	0	0	0	1	0	0	79.444	1
1711	1	0	62	0	0	1	0	0	0	0	0	0	0	0	0	0	0	0	0	0	0	0	0	0	79.444	1
1712	1	0	62	0	0	0	0	0	0	0	0	0	1	0	0	0	0	0	0	0	0	0	0	0	79.444	1
1713	1	0	62	0	0	0	0	0	0	0	0	0	0	0	0	0	0	0	0	0	0	1	0	0	79.444	1
1714	1	1	62	0	0	0	0	0	0	0	0	0	0	0	0	0	0	0	0	0	0	0	0	0	79.444	1
1715	1	0	62	0	0	0	0	0	0	0	0	0	1	0	1	0	0	0	0	0	0	1	0	0	79.444	1
1716	1	1	62	0	0	0	0	0	0	0	0	0	0	0	0	0	0	1	0	1	0	1	0	0	79.444	1
1717	1	0	63	0	0	1	0	0	0	0	0	0	0	1	0	0	0	0	0	0	0	1	0	0	100.231	1
1718	1	0	63	0	0	0	0	0	0	0	0	0	1	1	0	0	0	0	0	0	0	0	0	0	100.231	1
1719	1	1	63	0	0	0	0	0	0	0	0	0	0	0	1	0	0	0	0	0	0	1	0	0	80.5551	1
1720	1	1	63	0	0	0	0	0	0	0	0	0	0	0	1	0	0	0	0	0	0	1	0	0	80.5551	1
1721	1	1	63	0	0	0	0	0	0	0	0	0	0	0	0	0	0	0	0	0	0	0	0	0	80.5551	1
1722	1	1	63	0	0	0	0	0	0	0	0	0	0	0	0	0	0	1	0	0	0	1	0	0	80.5551	1
1723	1	0	63	0	0	1	0	0	0	0	0	0	0	0	0	1	0	0	0	0	0	1	0	0	80.5551	1
1724	1	1	63	1	1	0	0	0	0	0	0	0	0	0	0	0	0	0	0	0	0	0	0	0	101.779	1
1725	1	1	63	1	1	0	1	0	1	1	0	0	0	0	0	0	0	0	0	0	0	1	1	0	177.118	1
1726	1	0	63	0	0	1	0	0	0	0	0	0	0	0	0	0	0	0	0	0	0	0	0	0	80.5551	1
1727	1	0	63	0	0	1	0	0	0	0	0	0	0	1	0	0	0	0	0	0	0	0	0	0	100.231	1
1728	1	1	63	0	0	0	0	0	0	0	0	0	0	0	0	0	0	0	0	0	0	1	0	0	80.5551	1
1729	1	0	63	0	0	0	0	0	0	0	1	0	0	1	0	0	0	0	0	0	0	1	1	0	100.231	1
1730	1	0	63	0	0	1	0	0	0	0	0	0	0	0	0	0	0	0	0	0	0	0	0	0	80.5551	1
1731	1	1	63	0	0	0	0	0	0	0	0	0	0	0	1	0	0	0	0	0	0	1	1	0	80.5551	1
1732	1	1	64	0	0	1	0	0	0	0	0	0	1	0	0	0	0	0	0	0	0	1	0	0	81.6662	1
1733	1	0	64	0	0	1	0	0	0	0	0	0	0	0	0	0	0	0	0	0	0	0	0	0	81.6662	1
1734	1	1	64	0	0	0	0	0	0	0	0	0	0	0	1	0	0	1	1	0	0	1	0	0	118.607	1
1735	1	0	64	0	0	1	0	0	0	0	0	0	0	0	0	0	0	0	0	0	0	1	0	0	81.6662	1
1736	1	1	64	0	0	0	0	0	0	0	0	0	0	0	0	0	0	0	0	0	0	1	0	0	81.6662	1
1737	1	0	64	0	0	0	0	0	0	0	0	0	0	0	0	0	0	0	0	0	0	1	1	0	81.6662	1
1738	1	0	64	0	0	0	0	0	0	0	0	1	0	0	0	0	0	0	0	0	0	1	0	0	112.775	1
1739	0	1	64	0	0	0	0	0	0	0	0	1	0	0	0	0	0	0	0	0	0	1	1	0	91.109	1
1740	1	1	64	0	0	0	0	0	0	0	0	0	0	0	0	0	0	0	0	0	0	1	0	0	81.6662	1
1741	1	1	64	0	0	0	0	0	0	0	0	0	0	0	1	0	0	0	0	0	1	0	0	0	81.6662	1
1742	1	1	64	0	0	1	0	0	0	0	0	0	0	0	0	0	0	0	0	0	0	0	0	0	81.6662	1
1743	1	0	64	0	0	0	0	0	0	0	0	1	0	0	0	0	0	0	0	0	0	0	0	0	112.775	1
1744	1	1	64	0	0	0	0	0	0	0	0	0	1	0	0	1	0	0	0	0	0	0	0	0	81.6662	1
1745	1	1	64	0	0	0	0	0	0	0	0	0	0	0	0	0	0	0	0	0	0	0	0	0	81.6662	1
1746	1	0	64	0	0	0	0	0	0	0	0	0	0	0	1	0	0	0	0	0	0	1	1	0	81.6662	1
1747	1	0	64	0	0	0	0	0	0	0	0	0	0	0	0	0	0	0	1	1	0	1	0	0	118.607	1
1748	1	1	65	0	0	0	0	0	0	0	0	0	0	0	0	0	0	0	0	0	0	0	0	0	82.7773	1
1749	1	0	65	0	0	1	0	0	0	0	0	0	1	0	0	0	0	0	0	0	0	1	0	0	82.7773	1
1750	1	0	65	0	0	1	0	0	0	0	0	0	0	0	0	0	0	0	0	0	0	1	0	0	82.7773	1
1751	1	1	65	0	0	0	0	0	0	0	0	0	0	1	0	0	0	0	0	0	0	1	1	0	102.454	1
1752	1	0	65	0	0	0	0	0	1	0	0	0	0	0	0	0	0	0	0	0	0	1	0	0	82.7773	1
1753	1	0	65	0	0	0	0	0	0	0	0	0	0	0	0	0	0	0	0	0	1	1	0	0	82.7773	1
1754	1	0	65	0	0	0	0	0	0	0	0	0	0	0	0	0	0	0	0	0	0	1	0	0	82.7773	1
1755	1	1	65	0	0	0	0	0	0	0	0	0	0	0	0	0	0	0	0	0	0	0	0	0	82.7773	1
1756	1	0	65	0	0	1	0	0	0	0	0	0	0	0	0	0	0	0	0	0	0	1	0	0	82.7773	1
1757	1	1	65	0	0	1	0	0	0	0	0	0	0	0	0	0	0	0	0	0	0	1	0	0	82.7773	1
1758	1	0	65	0	0	0	0	0	0	0	0	0	0	0	0	0	0	0	0	0	0	1	0	0	82.7773	1
1759	1	1	65	0	0	0	0	0	0	0	0	0	0	1	0	0	0	0	0	0	0	1	1	0	102.454	1
1760	1	1	65	0	0	0	0	0	0	0	0	0	0	0	0	0	0	0	0	0	0	0	0	0	82.7773	1
1761	1	1	66	1	1	0	1	0	0	0	0	0	0	0	0	0	0	0	0	0	0	1	0	0	119.265	1
1762	1	1	66	0	0	0	0	0	0	0	0	0	0	0	1	0	0	0	1	0	0	1	1	0	120.829	1
1763	1	1	66	0	0	1	0	0	0	0	0	0	0	0	0	0	0	0	0	0	0	1	0	0	83.8884	1
1764	1	1	66	0	0	0	0	1	1	0	0	0	0	0	0	0	1	0	0	0	0	1	1	0	122.061	1
1765	1	1	66	0	0	0	0	0	0	0	0	0	0	0	0	0	0	0	0	0	0	0	0	0	83.8884	1
1766	1	1	66	0	0	0	0	0	0	1	0	0	0	1	0	0	0	0	0	0	0	0	0	0	164.751	1
1767	1	0	66	0	0	0	0	0	0	0	0	0	0	0	0	0	0	0	0	0	1	1	0	0	83.8884	1
1768	1	1	66	0	0	1	0	0	0	0	0	0	0	0	0	0	0	0	0	0	0	1	0	0	83.8884	1
1769	1	0	66	0	0	1	0	0	0	0	0	0	0	0	0	0	0	0	0	0	0	0	0	0	83.8884	1
1770	1	0	66	0	0	0	0	0	0	0	0	1	0	0	0	0	0	0	0	0	0	1	0	0	114.997	1
1771	0	1	66	0	0	0	0	0	0	0	0	0	0	0	0	0	0	0	0	0	0	0	0	0	62.2222	0
1772	1	0	66	0	0	1	0	0	0	1	0	0	0	1	0	0	0	0	0	0	0	1	1	0	164.751	1
1773	1	0	66	0	0	0	0	0	0	0	0	0	0	0	0	0	0	0	0	1	0	1	0	0	83.8884	1
1774	1	0	66	0	0	0	0	0	0	0	0	0	1	0	0	0	0	0	0	0	0	0	0	0	83.8884	1
1775	1	0	66	0	0	0	0	0	0	0	0	0	0	1	0	0	0	0	0	0	0	0	0	0	103.565	1
1776	1	1	66	0	0	0	0	0	1	0	0	0	0	0	0	0	0	0	0	0	0	0	0	0	83.8884	1
1777	1	0	67	0	0	1	0	0	0	0	0	0	0	0	1	0	0	0	0	0	0	0	0	0	84.9995	1
1778	1	1	67	1	0	0	0	0	0	1	0	0	0	1	0	0	0	0	0	0	0	1	1	0	187.085	1
1779	1	1	67	0	0	0	0	0	0	0	0	0	0	0	0	0	0	0	0	0	0	0	0	0	84.9995	1
1780	1	1	67	0	1	0	0	0	0	0	0	0	1	0	0	0	0	0	0	0	0	1	1	0	84.9995	1
1781	1	0	67	0	0	1	0	0	0	0	0	0	0	1	0	0	0	0	0	0	0	1	0	0	104.676	1
1782	1	1	67	0	0	0	0	0	0	0	0	0	0	0	0	0	0	0	0	0	0	1	0	0	84.9995	1
1783	1	0	67	0	0	0	0	0	0	0	0	0	0	0	0	0	0	0	0	0	0	1	0	0	84.9995	1
1784	1	1	67	1	1	0	1	0	1	0	0	1	0	1	0	0	0	1	1	0	0	1	1	0	208.102	1
1785	1	1	67	0	0	0	0	0	0	1	0	0	0	0	0	0	0	0	0	0	0	1	0	0	146.185	1
1786	1	1	67	1	0	0	0	0	0	0	0	0	0	0	0	0	0	0	0	0	0	1	1	0	106.223	1
1787	1	1	67	0	0	0	0	0	0	0	0	0	0	0	0	0	0	0	0	0	0	0	0	0	84.9995	1
1788	1	1	67	0	1	0	0	0	0	0	0	0	0	0	1	0	0	0	0	0	0	1	1	0	84.9995	1
1789	1	0	67	0	0	1	1	0	0	0	0	0	0	1	0	0	0	0	0	0	1	1	1	0	118.829	1
1790	1	1	67	0	0	0	0	0	0	0	0	0	0	1	0	0	0	0	0	0	0	1	1	0	104.676	1
1791	1	0	68	0	0	0	0	0	0	0	0	1	0	0	0	0	0	0	0	0	0	1	1	0	117.22	1
1792	1	0	68	0	0	0	0	0	0	0	0	0	0	0	0	0	0	0	0	0	0	0	0	0	86.1107	1
1793	1	1	68	0	0	0	0	0	0	0	0	0	0	0	0	0	0	0	0	0	0	1	0	0	86.1107	1
1794	1	0	68	0	0	0	0	0	0	0	0	0	0	1	0	0	0	0	0	0	0	0	0	0	105.787	1
1795	1	0	68	0	0	1	0	0	0	0	0	0	0	0	0	0	0	0	0	0	0	1	0	0	86.1107	1
1796	1	1	68	0	0	0	0	0	0	0	0	0	0	1	0	0	0	0	0	0	0	1	1	0	105.787	1
1797	1	0	68	0	0	0	0	0	0	0	0	0	0	1	0	0	0	0	0	0	0	1	0	0	105.787	1
1798	1	0	68	0	0	1	0	0	0	0	0	0	0	0	0	0	0	0	0	0	0	1	0	0	86.1107	1
1799	1	0	68	0	0	0	0	0	0	0	0	0	0	1	0	0	1	0	0	0	1	1	0	0	105.787	1
1800	1	1	68	1	1	0	1	0	0	0	0	0	0	1	0	0	0	0	0	0	1	1	0	0	141.164	1
1801	1	1	68	0	0	0	0	0	0	0	0	1	0	0	0	0	0	0	0	0	0	0	0	0	117.22	1
1802	1	0	68	0	0	0	0	0	0	0	0	0	0	0	0	0	0	0	0	0	0	1	0	0	86.1107	1
1803	1	0	68	0	0	0	0	0	0	0	0	1	0	0	0	0	0	0	0	0	0	1	1	0	117.22	1
1804	1	1	68	0	0	0	0	0	0	0	0	0	0	0	0	0	0	0	0	0	0	1	0	0	86.1107	1
1805	1	1	68	0	0	0	0	0	0	0	0	0	0	0	0	0	0	0	0	0	0	1	0	0	86.1107	1
1806	1	1	68	0	0	0	0	0	0	0	0	0	0	0	0	0	0	0	0	0	0	1	0	0	86.1107	1
1807	1	0	68	0	0	0	0	0	0	0	0	0	1	0	0	0	0	0	0	0	0	1	0	0	86.1107	1
1808	1	1	68	0	0	0	0	0	0	0	0	0	0	0	0	0	0	0	0	0	0	1	0	0	86.1107	1
1809	1	0	68	0	0	0	0	0	0	0	0	0	0	0	0	0	0	0	0	0	0	1	0	0	86.1107	1
1810	1	0	69	0	0	0	0	0	0	0	0	0	0	0	0	0	0	0	0	0	1	0	0	0	87.2218	1
1811	1	1	69	1	1	0	1	0	0	0	0	0	0	1	0	0	0	0	0	0	0	1	1	0	142.275	1
1812	1	1	69	0	0	1	0	0	1	0	0	0	0	0	0	0	0	0	0	0	0	0	0	0	87.2218	1
1813	1	1	69	0	0	0	0	0	0	0	0	1	0	0	0	0	0	0	0	0	0	1	0	0	118.331	1
1814	1	0	69	0	0	0	0	0	0	0	0	1	0	0	0	0	0	0	0	0	0	0	0	0	118.331	1
1815	1	0	69	0	0	0	0	0	0	0	0	0	0	0	0	0	0	0	0	0	0	0	0	0	87.2218	1
1816	1	0	69	0	0	0	0	0	0	0	0	0	0	0	0	0	0	0	0	0	0	1	0	0	87.2218	1
1817	1	0	69	0	0	0	0	0	0	1	0	0	0	1	0	0	0	0	0	0	0	1	0	0	168.084	1
1818	1	1	69	0	0	0	0	0	0	0	0	0	0	1	0	0	0	0	0	0	0	1	0	0	106.898	1
1819	1	0	69	0	0	0	0	0	0	0	0	0	0	0	0	1	0	0	0	0	0	0	0	0	87.2218	1
1820	0	1	69	0	0	0	1	0	1	0	0	0	0	0	0	0	0	0	0	0	0	0	0	0	79.7084	1
1821	1	0	69	0	0	0	0	0	0	1	0	0	0	1	0	0	0	0	0	0	0	0	0	0	168.084	1
1822	1	1	69	0	0	0	0	0	0	0	0	0	0	0	0	0	0	0	0	0	0	0	0	0	87.2218	1
1823	1	1	69	0	0	0	0	0	0	0	0	0	1	0	0	0	0	0	0	0	1	0	0	0	87.2218	1
1824	1	1	69	0	0	0	0	0	0	1	0	0	0	0	0	0	0	0	0	0	0	0	0	0	148.408	1
1825	1	1	69	1	1	0	1	0	0	0	0	0	0	0	1	0	0	0	1	0	0	1	1	0	159.539	1
1826	1	0	69	1	1	0	1	0	0	0	0	0	0	0	0	0	0	0	1	0	0	1	1	0	159.539	1
1827	1	1	69	0	0	0	0	0	0	0	0	0	0	0	0	0	0	0	0	0	0	0	0	0	87.2218	1
1828	1	0	70	0	0	1	0	0	0	0	0	0	0	0	0	0	0	0	0	0	0	1	0	0	88.3329	1
1829	1	0	70	0	0	0	0	0	0	0	0	0	0	0	0	0	0	0	0	1	0	1	0	0	88.3329	1
1830	1	1	70	0	0	0	0	0	0	0	0	0	1	0	0	0	0	1	0	0	0	1	0	0	88.3329	1
1831	1	0	70	0	0	0	0	0	0	0	0	0	0	0	1	0	0	0	0	0	0	0	0	0	88.3329	1
1832	1	0	70	0	0	0	0	0	0	0	0	0	0	1	0	0	0	0	0	0	0	1	0	0	108.009	1
1833	1	1	70	0	0	0	0	0	0	0	0	0	0	1	0	0	0	0	0	0	0	1	0	0	108.009	1
1834	1	0	70	0	0	0	0	0	0	0	0	0	0	1	0	0	0	0	0	0	0	0	0	0	108.009	1
1835	1	1	70	0	1	0	0	0	0	0	0	0	0	0	0	0	0	0	0	0	0	0	0	0	88.3329	1
1836	0	0	70	0	0	0	0	0	0	0	0	0	0	0	0	0	0	0	0	0	0	1	0	0	66.6667	0
1837	0	1	70	0	0	0	0	0	0	0	0	0	1	0	0	0	0	0	0	0	0	1	0	0	66.6667	0
1838	1	0	70	0	0	0	0	0	0	0	0	0	0	0	0	0	0	0	0	0	0	1	0	0	88.3329	1
1839	1	0	70	0	0	0	0	0	0	0	0	0	0	0	0	0	0	0	0	0	0	0	0	0	88.3329	1
1840	1	0	70	0	0	1	0	0	0	0	0	0	0	0	0	0	0	0	0	0	0	1	0	0	88.3329	1
1841	1	0	70	0	0	0	0	0	0	0	0	0	1	1	0	0	0	0	0	0	0	0	0	0	108.009	1
1842	1	1	70	0	0	0	0	0	0	0	0	0	0	1	0	0	0	0	0	0	0	1	0	0	108.009	1
1843	1	0	70	0	0	1	0	0	0	0	1	0	0	1	0	0	0	0	0	0	0	1	0	0	108.009	1
1844	1	1	70	0	0	0	0	0	0	0	0	0	0	0	0	0	0	0	0	0	0	1	0	0	88.3329	1
1845	1	1	71	0	0	0	0	0	0	0	0	0	0	1	0	0	0	0	0	0	0	0	0	0	109.12	1
1846	1	1	71	0	0	0	0	0	0	0	0	0	0	0	0	0	0	0	0	0	0	1	0	0	89.444	1
1847	1	1	71	0	0	0	0	0	0	0	0	0	0	0	0	0	0	0	0	0	0	0	0	0	89.444	1
1848	1	0	71	0	0	0	0	0	0	0	0	0	0	0	0	0	1	0	0	0	0	1	1	0	89.444	1
1849	1	0	71	0	0	0	0	0	0	0	0	0	0	1	0	0	0	0	0	0	0	1	1	0	109.12	1
1850	0	1	72	0	0	1	0	0	0	0	0	0	0	0	1	0	0	0	0	0	0	1	0	0	68.8889	0
1851	1	0	72	0	0	1	0	0	0	0	0	0	0	0	0	0	0	0	0	0	0	1	0	0	90.5551	1
1852	1	1	72	0	1	0	0	0	0	0	0	0	0	0	0	0	0	0	0	0	0	0	0	0	90.5551	1
1853	1	1	72	0	0	0	0	0	1	1	0	0	0	1	0	0	0	0	0	0	0	0	0	0	171.417	1
1854	1	1	72	0	0	0	0	0	0	0	0	0	1	0	0	0	0	0	0	0	1	1	0	0	90.5551	1
1855	1	1	72	1	1	0	1	0	1	0	0	0	0	1	0	0	0	1	1	0	0	1	1	0	182.549	1
1856	1	1	72	0	0	0	1	0	0	0	0	0	0	0	0	0	0	0	0	0	1	1	0	0	104.708	1
1857	1	0	72	0	0	0	0	0	0	0	0	0	0	0	0	0	0	0	0	0	0	0	0	0	90.5551	1
1858	1	1	72	0	0	0	0	0	0	0	0	0	0	1	0	0	0	0	0	1	0	1	0	0	110.231	1
1859	0	1	72	1	0	0	0	0	0	0	0	0	0	0	0	0	0	0	0	0	0	1	1	0	90.1127	1
1860	0	0	72	0	0	0	0	0	0	0	0	0	0	1	0	0	0	0	0	0	0	0	0	0	88.5651	1
1861	1	1	72	0	0	1	0	0	0	0	0	1	0	0	0	0	0	0	0	0	0	1	0	0	121.664	1
1862	1	1	72	0	1	0	0	0	0	0	0	0	0	1	0	0	0	0	0	0	1	1	0	0	110.231	1
1863	1	0	72	0	0	0	0	0	0	0	0	0	0	0	0	0	0	0	0	0	0	1	0	0	90.5551	1
1864	1	1	72	0	0	0	0	0	0	0	0	0	0	0	0	0	0	0	0	0	0	0	0	0	90.5551	1
1865	1	0	72	0	0	0	0	0	1	0	0	1	0	0	0	1	0	0	0	0	0	0	0	0	121.664	1
1866	1	1	72	0	0	0	0	0	0	0	0	0	0	0	0	0	0	0	0	0	0	0	0	0	90.5551	1
1867	1	1	72	0	0	0	0	0	0	0	0	0	0	1	0	0	0	0	0	0	0	1	1	0	110.231	1
1868	1	0	73	0	0	1	0	0	0	0	0	0	0	1	0	0	0	0	0	0	0	1	0	0	111.342	1
1869	1	1	73	0	0	0	0	0	0	0	0	0	0	0	0	0	0	0	0	0	1	1	1	0	91.6662	1
1870	1	0	73	1	0	0	0	0	0	0	0	0	0	1	0	0	0	0	0	0	0	1	0	0	132.566	1
1871	1	1	73	1	0	0	0	0	0	0	0	0	0	1	0	0	0	0	0	0	0	0	0	0	132.566	1
1872	1	0	73	0	0	0	0	0	0	0	0	0	0	0	0	0	0	0	0	0	0	1	0	0	91.6662	1
1873	1	0	73	0	0	0	0	0	0	0	0	0	0	1	0	0	0	0	0	0	0	1	1	0	111.342	1
1874	1	0	73	0	0	1	0	0	0	0	0	0	1	0	0	0	0	0	0	0	0	1	0	0	91.6662	1
1875	1	0	73	0	0	1	0	0	0	0	0	0	0	0	1	0	0	0	0	0	0	1	1	0	91.6662	1
1876	1	1	73	0	0	0	0	0	0	0	0	0	0	1	0	0	0	0	0	0	0	1	0	0	111.342	1
1877	1	0	73	0	0	0	0	0	0	0	0	0	0	0	0	0	0	0	0	0	0	1	0	0	91.6662	1
1878	1	0	73	0	0	1	0	0	0	0	0	0	0	0	0	0	0	0	0	0	0	1	1	0	91.6662	1
1879	1	1	73	1	1	0	1	0	0	1	0	0	0	0	0	0	0	0	0	0	0	1	1	0	188.229	1
1880	1	1	73	1	0	1	0	0	0	1	0	0	0	0	0	0	0	0	0	0	0	1	1	0	174.076	1
1881	1	1	73	1	1	0	1	0	0	0	0	0	0	0	0	0	0	0	0	0	0	1	1	0	127.043	1
1882	1	1	73	0	0	0	0	0	0	0	0	0	0	0	0	0	0	0	0	0	0	1	1	0	91.6662	1
1883	1	0	73	0	0	0	0	0	0	0	0	0	0	1	0	0	0	0	0	0	0	0	0	0	111.342	1
1884	1	1	74	0	0	0	0	0	0	0	0	0	0	0	0	0	0	0	0	0	0	0	0	0	92.7773	1
1885	1	1	74	0	0	0	0	1	1	0	0	0	0	0	0	1	0	0	0	0	0	1	0	0	130.95	1
1886	1	0	74	0	0	0	0	0	0	0	0	0	1	0	0	0	0	0	0	0	0	1	0	0	92.7773	1
1887	1	1	74	0	0	1	0	0	0	0	0	1	0	0	0	0	0	0	0	0	0	1	1	0	123.886	1
1888	1	0	74	0	0	0	0	0	0	0	0	0	0	0	0	0	0	0	0	0	0	1	0	0	92.7773	1
1889	1	1	74	0	0	0	0	0	0	0	0	0	0	1	0	0	0	0	0	0	0	1	0	0	112.454	1
1890	1	1	74	0	0	0	0	0	0	0	0	1	0	0	0	0	0	0	0	0	0	0	0	0	123.886	1
1891	1	0	74	0	0	0	0	0	0	0	0	0	0	1	0	0	0	0	0	0	0	1	0	0	112.454	1
1892	1	0	74	0	0	0	0	0	0	0	0	0	0	1	0	0	0	0	0	0	0	1	0	0	112.454	1
1893	1	0	74	0	0	0	0	0	0	0	0	0	0	0	0	0	0	0	0	0	0	1	0	0	92.7773	1
1894	1	1	74	0	0	0	0	0	0	0	0	0	0	0	0	0	0	0	0	0	0	0	0	0	92.7773	1
1895	1	1	74	0	0	0	0	0	0	0	0	0	0	0	0	0	0	0	0	0	0	0	0	0	92.7773	1
1896	1	1	74	0	0	0	0	0	0	0	0	0	0	0	0	0	0	0	0	0	0	0	0	0	92.7773	1
1897	1	0	75	0	0	0	0	0	1	0	0	0	0	1	0	1	1	0	0	0	0	1	0	0	113.565	1
1898	1	1	75	1	1	0	1	0	0	0	0	0	1	0	0	0	0	0	0	0	0	1	0	0	129.265	1
1899	1	0	75	0	0	0	0	0	0	0	0	0	0	0	1	0	0	0	0	0	0	1	0	0	93.8884	1
1900	1	1	75	1	0	0	0	0	0	0	0	0	0	0	0	1	0	0	0	0	0	1	1	0	115.112	1
1901	0	1	75	0	0	0	0	0	0	0	0	0	0	1	1	0	0	0	0	0	0	0	0	0	91.8984	1
1902	1	1	75	0	0	0	0	0	0	0	0	0	0	0	0	0	0	0	0	0	0	0	0	0	93.8884	1
1903	1	0	75	0	0	0	0	0	1	0	0	1	0	0	1	0	0	0	0	0	0	1	1	0	124.997	1
1904	1	1	75	0	0	0	0	0	1	0	0	0	0	0	0	0	0	0	0	0	0	1	0	0	93.8884	1
1905	1	0	75	0	0	0	0	0	1	0	0	0	0	0	0	0	0	0	0	0	0	1	0	0	93.8884	1
1906	0	1	75	0	0	1	0	0	0	0	0	0	0	0	0	0	0	0	0	0	0	0	0	0	72.2222	0
1907	1	0	75	0	0	0	0	0	0	0	0	0	0	1	0	0	0	0	0	0	1	0	0	0	113.565	1
1908	1	0	75	1	1	0	1	0	0	0	0	0	0	0	0	0	0	0	0	0	0	1	1	0	129.265	1
1909	1	0	75	0	0	0	0	0	0	0	0	0	0	1	0	0	0	0	0	0	0	0	0	0	113.565	1
1910	1	0	76	0	0	0	1	0	0	0	0	0	0	1	0	0	0	0	0	0	0	1	1	0	128.829	1
1911	1	0	76	0	0	0	0	0	0	1	0	0	0	0	1	0	0	0	0	0	0	1	1	0	156.185	1
1912	1	0	76	0	0	0	0	0	0	0	0	0	0	0	0	0	0	0	0	0	0	1	0	0	94.9995	1
1913	1	0	76	0	0	1	0	0	0	0	0	0	0	0	0	0	0	0	0	0	0	1	0	0	94.9995	1
1914	1	0	76	0	0	0	0	0	0	0	0	0	0	0	0	0	0	0	0	0	0	1	0	0	94.9995	1
1915	1	0	76	1	1	0	1	0	0	0	0	0	0	0	0	1	0	0	0	0	0	1	1	0	130.376	1
1916	1	1	76	0	0	0	0	0	0	0	0	0	0	0	0	0	0	0	0	0	0	1	0	0	94.9995	1
1917	1	0	76	0	0	0	0	0	0	0	0	0	0	0	0	0	0	0	0	0	0	1	0	0	94.9995	1
1918	1	1	76	0	0	0	0	0	0	0	0	0	0	0	0	1	0	0	0	0	1	1	0	0	94.9995	1
1919	1	0	76	0	0	0	0	0	0	0	0	0	0	1	0	0	0	0	0	0	0	0	0	0	114.676	1
1920	1	1	77	1	1	0	1	0	1	0	0	1	0	1	1	0	0	0	0	0	0	1	1	0	182.273	1
1921	1	0	77	0	1	0	0	0	0	0	0	0	0	1	0	0	0	0	0	0	0	1	1	0	115.787	1
1922	1	1	77	0	0	0	0	0	0	0	0	0	0	1	0	0	0	0	0	0	0	0	0	0	115.787	1
1923	1	0	77	0	0	0	0	0	0	0	0	0	0	0	0	0	0	0	0	0	0	1	0	0	96.1107	1
1924	1	1	77	0	0	0	0	0	0	0	0	0	0	0	0	0	0	0	0	0	0	0	0	0	96.1107	1
1925	1	0	77	0	0	0	0	0	0	0	0	0	0	0	0	0	0	0	0	0	0	1	0	0	96.1107	1
1926	1	0	77	0	0	0	0	0	0	0	0	0	0	1	0	0	0	0	0	0	0	1	0	0	115.787	1
1927	1	1	77	0	0	1	0	0	0	0	0	0	0	0	0	0	0	0	0	0	0	1	0	0	96.1107	1
1928	1	0	77	0	0	0	0	0	0	0	0	0	0	0	0	0	0	0	0	0	0	1	0	0	96.1107	1
1929	1	1	77	0	0	1	1	0	0	0	0	0	0	0	0	0	0	0	0	0	0	0	0	0	110.264	1
1930	1	1	77	0	0	1	0	0	0	0	0	0	0	0	0	0	0	0	0	0	0	0	0	0	96.1107	1
1931	1	1	77	0	0	0	0	0	0	0	0	0	0	0	1	0	0	0	0	0	0	1	0	0	96.1107	1
1932	1	1	77	0	0	0	0	1	1	0	1	0	0	1	0	0	0	0	0	0	0	1	0	0	153.96	1
1933	1	0	78	0	0	0	0	0	0	0	0	0	0	1	1	0	0	0	0	0	0	1	1	0	116.898	1
1934	1	1	78	1	0	0	0	0	0	0	0	0	0	0	1	0	0	0	0	0	0	1	0	0	118.446	1
1935	1	0	78	1	0	0	0	0	0	1	0	0	0	1	0	0	0	0	0	0	0	1	1	0	199.308	1
1936	1	1	78	1	1	0	1	0	0	0	0	0	0	1	0	0	0	0	0	0	0	0	0	0	152.275	1
1937	1	0	78	0	0	0	0	0	0	0	0	0	0	0	0	0	0	0	0	0	0	1	1	0	97.2218	1
1938	1	1	78	0	0	0	0	0	0	0	0	1	0	0	0	0	0	0	0	0	0	1	1	0	128.331	1
1939	1	0	78	0	1	0	0	0	0	0	0	0	0	1	0	0	0	0	0	0	1	1	1	0	116.898	1
1940	1	1	78	0	0	0	0	0	0	0	0	0	0	0	0	0	0	0	0	0	0	1	0	0	97.2218	1
1941	1	1	78	0	0	1	0	0	1	0	0	0	0	1	0	0	0	0	0	0	1	0	0	0	116.898	1
1942	1	1	78	0	0	0	0	1	1	0	0	0	0	1	0	0	0	0	0	0	0	1	0	0	155.071	1	OR	7.10335975(CI: 5.10620249 9.96598773)
1943	1	1	78	0	0	0	0	0	0	0	0	0	0	0	0	0	0	0	0	0	0	0	0	0	97.2218	1
1944	0	0	78	0	0	1	0	0	0	0	0	0	0	0	0	0	0	0	0	0	0	1	1	0	75.5555	0
1945	1	0	78	0	0	0	0	0	0	0	0	0	0	1	0	0	0	0	0	0	0	1	0	0	116.898	1
1946	0	1	79	0	0	0	0	0	0	0	0	0	0	0	0	1	0	0	0	0	1	1	0	0	76.6667	1
1947	1	0	79	0	0	0	0	0	0	0	0	0	1	0	0	0	0	0	0	0	1	0	0	0	98.3329	1
1948	1	1	79	0	1	0	0	0	0	0	0	0	0	1	0	0	0	0	0	0	0	1	1	0	118.009	1
1949	1	1	79	0	0	1	0	0	0	0	1	0	0	0	0	0	0	0	0	0	0	0	0	0	98.3329	1
1950	1	0	79	0	0	0	0	0	0	0	0	0	0	0	0	0	0	0	0	0	0	1	1	0	98.3329	1
1951	1	0	79	0	0	0	0	0	0	0	0	0	0	0	0	0	0	0	0	0	0	0	0	0	98.3329	1
1952	1	0	80	0	0	0	0	0	0	0	0	0	0	1	0	0	0	0	0	0	0	1	1	0	119.12	1
1953	1	0	81	0	1	0	0	0	0	0	1	0	0	0	0	0	0	0	0	0	0	1	1	0	100.555	1
1954	1	0	81	0	0	0	0	0	0	0	0	0	0	0	0	1	0	0	0	0	0	1	1	0	100.555	1
1955	0	0	81	0	0	0	0	0	1	0	0	0	0	0	1	0	0	0	0	0	0	1	1	0	78.8889	1
1956	1	0	81	0	0	0	0	0	0	0	0	0	0	0	0	0	0	0	0	0	0	1	0	0	100.555	1
1957	1	0	81	0	0	0	0	0	0	0	0	1	0	0	1	0	0	0	0	0	0	0	0	0	131.664	1
1958	1	1	81	0	0	0	0	0	0	1	0	0	0	0	1	0	0	0	0	0	0	1	1	0	161.741	1
1959	1	1	81	1	0	0	0	0	1	0	0	0	0	1	0	0	0	0	0	0	0	0	0	0	141.455	1
1960	1	0	81	0	0	0	0	1	1	1	0	0	0	0	0	0	0	1	0	0	0	1	1	0	199.914	1
1961	1	1	81	0	0	0	0	0	0	0	0	0	0	0	0	0	1	0	0	0	0	1	0	0	100.555	1
1962	1	1	82	0	0	0	0	0	0	0	0	0	1	0	0	1	0	0	0	0	0	1	0	0	101.666	1
1963	1	0	82	0	0	0	0	0	0	0	0	0	0	1	0	0	0	0	0	0	0	1	1	0	121.342	1
1964	1	1	82	1	1	0	1	0	1	0	0	0	0	1	0	0	0	0	0	0	0	1	0	0	156.719	1
1965	1	0	82	0	0	0	0	0	0	0	0	0	0	0	0	0	0	0	0	0	0	1	0	0	101.666	1
1966	0	0	83	0	0	1	0	0	0	1	0	0	0	0	0	0	0	0	0	0	0	1	1	0	142.297	1
1967	1	1	83	0	0	0	0	0	0	1	0	0	0	0	0	0	0	0	0	0	0	1	0	0	163.963	1
1968	1	0	83	0	0	0	0	0	0	0	0	0	0	0	0	0	0	0	0	0	0	1	0	0	102.777	1
1969	1	0	83	0	0	0	0	0	1	0	0	0	0	0	0	0	0	0	0	0	0	1	0	0	102.777	1
1970	1	1	84	0	0	1	0	0	0	0	0	0	0	1	0	0	0	0	0	0	0	0	0	0	123.565	1
1971	1	1	84	1	1	0	1	0	0	1	0	0	0	1	0	0	0	0	0	0	0	1	1	0	220.127	1
1972	1	0	86	0	0	0	1	0	0	0	0	0	0	0	1	1	0	0	0	0	0	1	1	0	120.264	1
1973	1	0	86	0	0	0	0	0	0	0	0	0	0	0	0	0	0	0	0	0	0	0	0	0	106.111	1
1974	1	0	86	0	0	0	0	0	0	0	0	0	0	1	0	0	0	0	0	0	0	1	0	0	125.787	1
1975	1	0	86	1	1	0	1	0	0	0	0	0	1	1	0	1	1	0	0	0	1	1	1	0	161.164	1
1976	1	0	87	0	0	0	0	0	0	1	0	0	0	0	0	0	0	0	0	0	0	1	1	0	168.408	1
1977	1	0	88	0	0	0	0	0	0	0	0	0	0	1	0	0	0	0	0	0	0	1	1	0	128.009	1
1978	1	0	90	0	0	0	0	0	0	0	0	0	0	0	0	0	0	0	0	0	0	0	0	0	110.555	1
1979	1	0	90	0	0	1	0	0	0	0	0	0	1	0	0	0	0	0	0	0	0	0	0	0	110.555	1
1980	1	1	91	0	0	0	0	0	0	0	0	0	0	1	0	0	0	0	0	0	0	1	0	0	131.342	1
1981	1	1	94	1	0	0	0	0	0	0	0	0	0	1	0	0	0	0	0	0	0	1	1	0	155.9	1
