# Supplementary material for: Derivation and internal validation of prediction models for pulmonary hypertension risk assessment in a cohort inhabiting Tibet, China
Source: eLife journal article supplement (doi:10.7554/elife.98169), 2024-08-07
Supplement: fig3-data1 [file Figure3E.xlsx]

## Sheet: PH2_DEV_cutoff_75.829
	Tibetan	Gender	Age	RAD	CR	CCR	HVRV	IRBBB	CRBBB	AF	SA	ST	SB	TC	STC	APB	JPB	VPB	PP	CLBBB	IAB	PH	PH2	Set	points	risk
1	1	1	74	0	0	1	0	0	0	0	0	0	0	0	0	0	0	0	0	0	0	1	0	1	92.7773	1
2	1	0	81	0	0	1	0	0	0	0	0	0	0	0	0	0	0	0	0	0	0	1	0	1	100.555	1
3	0	1	58	0	0	0	0	0	0	0	0	0	0	0	0	0	0	0	0	0	0	1	1	1	53.3333	0
4	0	1	42	0	1	0	0	0	0	0	0	0	0	0	0	0	0	0	0	0	0	1	0	1	35.5556	0
5	0	1	23	0	0	0	0	0	0	0	0	0	0	0	0	0	0	0	0	0	0	0	0	1	14.4444	0
6	0	1	26	0	0	0	0	0	0	0	1	0	0	0	0	0	0	0	0	0	0	1	0	1	17.7778	0
7	0	1	23	0	0	0	0	0	0	0	0	0	0	0	0	0	0	0	0	0	0	0	0	1	14.4444	0
8	0	1	32	0	0	0	0	0	0	0	0	0	0	0	0	0	0	0	0	0	0	0	0	1	24.4444	0
9	1	1	20	0	0	0	0	0	0	0	0	0	1	0	0	0	0	0	0	0	0	0	0	1	32.7773	0
10	1	0	49	0	0	0	0	0	0	0	0	0	0	0	0	0	0	0	0	0	0	0	0	1	64.9995	0
11	0	0	73	0	0	0	0	0	0	0	0	0	0	1	0	0	0	0	0	0	0	1	1	1	89.6762	1
12	1	0	36	0	0	1	0	0	0	0	0	0	0	0	0	0	0	0	0	0	0	1	0	1	50.5551	0
13	0	1	36	0	0	0	0	0	0	0	0	0	0	0	0	0	0	0	0	0	0	0	0	1	28.8889	0
14	1	1	61	1	0	0	0	0	0	0	0	0	0	0	0	0	0	0	0	0	1	0	0	1	99.5567	1
15	1	0	56	0	0	1	1	0	0	0	0	0	0	1	0	0	0	0	0	0	0	1	1	1	106.606	1
16	0	1	38	0	0	0	0	0	0	0	0	0	0	0	0	0	0	0	0	0	0	0	0	1	31.1111	0
17	0	0	38	0	0	0	0	0	0	0	0	0	0	0	0	0	0	0	0	0	0	1	0	1	31.1111	0
18	0	1	21	0	1	0	0	0	0	0	0	0	0	0	1	0	0	0	0	0	0	0	0	1	12.2222	0
19	0	1	44	1	0	0	0	0	0	0	0	0	0	0	0	0	0	0	0	0	0	0	0	1	59.0016	0
20	0	1	51	0	0	0	0	0	0	0	0	0	0	0	0	0	0	0	0	0	0	0	0	1	45.5555	0
21	1	1	49	0	0	1	0	0	0	0	0	0	0	0	0	0	0	0	0	0	0	0	0	1	64.9995	0
22	0	1	30	0	1	0	0	0	0	0	0	0	0	0	0	0	0	0	0	0	0	1	0	1	22.2222	0
23	0	1	42	0	1	0	0	0	0	0	0	0	0	0	1	0	0	0	0	0	0	1	0	1	35.5556	0
24	1	0	70	0	0	1	0	1	1	0	0	0	0	0	0	0	0	0	0	0	0	1	0	1	126.506	1
25	1	1	77	0	0	0	0	0	0	0	0	0	0	0	0	0	0	0	0	0	1	1	1	1	96.1107	1
26	1	0	66	1	1	0	1	0	1	1	0	0	0	0	0	0	0	0	0	0	0	1	1	1	180.451	1
27	1	0	62	0	0	0	0	0	0	0	0	0	1	0	0	0	0	0	0	0	0	0	0	1	79.444	1
28	0	1	30	1	0	1	0	0	0	0	0	0	0	0	0	0	0	0	0	0	0	0	0	1	43.446	0
29	0	1	41	0	0	0	0	0	0	0	0	0	0	0	0	0	0	0	0	0	0	0	0	1	34.4444	0
30	1	1	75	0	0	1	0	0	0	0	0	0	0	0	0	0	0	0	0	0	0	1	0	1	93.8884	1
31	0	1	25	1	0	0	0	0	0	0	0	0	0	0	0	0	0	0	0	0	0	0	0	1	37.8904	0
32	0	1	19	0	0	0	0	0	0	0	0	0	0	0	0	0	0	0	0	0	0	0	0	1	10	0
33	0	1	58	0	0	0	0	0	0	0	0	0	0	0	0	0	0	0	0	0	0	0	0	1	53.3333	0
34	0	1	22	1	0	0	0	0	0	0	0	0	0	0	0	0	0	0	0	0	0	0	0	1	34.5571	0
35	1	1	40	0	0	0	0	0	0	0	0	0	1	0	0	0	0	0	0	0	0	0	0	1	54.9995	0
36	0	1	29	0	0	0	0	0	0	0	0	0	0	0	0	0	0	0	0	0	0	0	0	1	21.1111	0
37	0	1	28	1	0	0	0	0	0	0	0	0	0	0	0	0	0	0	0	0	0	0	0	1	41.2238	0
38	0	1	60	1	1	0	1	0	0	0	0	0	0	0	0	0	0	0	0	0	0	1	1	1	90.9322	1
39	1	1	20	0	0	0	0	0	0	0	1	0	0	0	0	0	0	0	0	0	0	0	0	1	32.7773	0
40	0	1	34	0	0	0	0	0	0	0	0	0	0	1	0	0	0	0	0	0	0	0	0	1	46.3429	0
41	0	1	34	0	0	0	0	0	0	0	0	0	0	0	0	0	0	0	0	0	0	1	0	1	26.6667	0
42	0	1	34	0	0	0	0	1	1	0	0	1	0	0	0	0	0	0	0	0	0	1	0	1	95.9486	1
43	0	1	48	0	0	1	0	0	0	0	0	0	0	0	0	0	0	0	0	0	0	0	0	1	42.2222	0
44	0	1	70	1	1	0	0	0	0	0	0	0	0	0	0	0	0	0	0	0	0	0	0	1	87.8904	1
45	0	0	55	0	0	0	0	0	0	0	0	0	0	1	0	0	0	0	0	0	0	1	0	1	69.6762	0
46	0	1	49	0	0	0	0	0	0	0	0	0	0	1	0	0	0	0	0	0	0	0	0	1	63.0096	0
47	1	1	71	0	0	0	0	0	0	1	0	0	0	1	0	0	0	0	0	0	0	0	0	1	170.306	1
48	0	1	28	0	0	0	0	0	0	0	0	0	0	0	0	0	0	0	0	0	0	0	0	1	20	0
49	0	1	72	0	1	0	0	0	0	0	0	0	0	1	0	0	0	0	0	0	0	1	0	1	88.5651	1
50	0	1	41	0	0	0	0	0	0	0	1	0	0	0	0	0	0	0	0	0	0	0	0	1	34.4444	0
51	0	1	36	0	0	1	0	0	0	0	0	0	0	0	0	0	0	0	0	0	0	0	0	1	28.8889	0
52	0	1	22	0	0	0	0	0	0	0	1	0	0	0	0	0	0	0	0	0	0	0	0	1	13.3333	0
53	0	1	30	0	0	0	0	0	0	0	0	0	0	0	0	0	0	0	0	0	0	1	0	1	22.2222	0
54	0	1	33	0	0	1	0	0	0	0	0	0	0	1	0	0	0	0	0	0	0	0	0	1	45.2318	0
55	0	1	39	0	0	0	0	0	0	0	0	0	0	0	0	0	0	0	0	0	0	0	0	1	32.2222	0
56	1	0	73	0	0	0	0	0	0	0	0	0	0	0	0	0	0	0	0	0	0	1	0	1	91.6662	1
57	1	1	74	0	0	1	0	0	0	0	0	0	1	0	0	0	0	0	0	0	0	0	0	1	92.7773	1
58	0	1	36	0	0	0	0	0	0	0	0	0	0	0	0	0	0	0	0	0	0	0	0	1	28.8889	0
59	1	1	50	0	0	0	0	0	0	0	0	0	0	0	0	0	0	0	0	0	0	1	0	1	66.1107	0
60	0	1	33	1	1	0	0	0	0	0	0	0	0	0	0	0	0	0	0	0	0	0	0	1	46.7793	0
61	0	0	22	1	1	0	0	0	0	0	0	0	0	0	0	0	0	0	0	0	0	1	0	1	34.5571	0
62	0	1	30	0	0	0	0	0	0	0	0	0	0	0	0	0	0	0	0	0	0	0	0	1	22.2222	0
63	0	1	24	0	0	0	0	0	0	0	0	0	0	0	0	0	0	0	0	0	0	0	0	1	15.5556	0
64	0	1	35	0	0	0	0	1	1	0	0	0	0	0	0	0	0	0	0	0	0	0	0	1	65.9507	0
65	0	1	24	0	0	0	0	0	0	0	0	0	0	0	0	0	0	0	0	0	0	0	0	1	15.5556	0
66	1	1	23	0	0	0	0	0	0	0	1	0	0	0	1	0	0	0	0	0	0	0	0	1	36.1107	0
67	1	1	20	0	0	0	1	0	0	0	0	0	0	0	0	0	0	0	0	0	0	1	0	1	46.9302	0
68	1	1	73	0	0	0	0	0	0	0	0	0	0	0	0	0	0	0	0	0	0	0	0	1	91.6662	1
69	0	1	26	0	0	1	0	0	0	0	0	0	0	0	0	0	0	0	0	0	0	0	0	1	17.7778	0
70	0	1	23	0	0	0	0	0	0	0	1	0	0	0	0	0	0	0	0	0	0	0	0	1	14.4444	0
71	1	1	71	0	0	0	0	0	0	0	0	0	0	0	0	0	0	0	0	0	0	1	0	1	89.444	1
72	0	1	51	0	0	0	0	0	0	0	0	0	0	0	0	0	0	0	0	0	0	0	0	1	45.5555	0
73	0	1	15	0	0	0	0	0	0	0	0	0	0	0	0	0	0	0	0	0	0	0	0	1	5.55555	0
74	0	1	53	0	0	0	0	0	0	0	0	0	0	0	0	0	0	0	0	0	0	0	0	1	47.7778	0
75	0	1	45	0	0	0	0	0	0	0	0	0	0	0	0	0	0	0	0	0	0	0	0	1	38.8889	0
76	0	1	61	0	1	0	0	0	0	0	0	0	0	0	0	0	0	0	0	0	0	0	0	1	56.6667	0
77	1	1	27	0	0	1	0	0	0	0	0	0	0	0	0	0	0	0	0	0	0	1	0	1	40.5551	0
78	0	1	39	0	1	0	0	0	0	0	0	0	0	0	0	0	0	0	0	0	0	0	0	1	32.2222	0
79	0	1	27	0	0	0	0	0	0	0	1	0	0	0	0	0	0	0	0	0	0	0	0	1	18.8889	0
80	1	1	35	0	0	0	0	0	0	0	0	1	0	0	0	0	0	0	0	0	0	0	0	1	80.553	1
81	1	0	28	0	0	1	0	0	0	0	0	0	0	0	0	0	0	0	0	0	0	0	0	1	41.6662	0
82	0	1	31	0	0	0	0	0	0	0	0	0	0	0	0	0	0	0	0	0	0	1	0	1	23.3333	0
83	0	1	21	0	0	1	0	0	0	0	0	0	0	0	0	0	0	0	0	0	0	0	0	1	12.2222	0
84	0	1	25	0	0	0	0	0	0	0	0	0	1	0	0	0	0	0	0	0	0	0	0	1	16.6667	0
85	1	0	65	0	0	0	0	0	0	0	0	0	0	0	0	0	0	0	0	0	0	1	0	1	82.7773	1
86	1	1	50	0	0	0	0	0	0	0	0	0	0	0	0	0	0	0	0	0	0	1	0	1	66.1107	0
87	0	1	46	0	0	0	1	0	0	0	0	0	0	0	0	0	0	0	0	0	0	1	0	1	54.1529	0
88	0	0	48	0	0	0	0	0	0	0	0	0	0	0	0	0	0	0	0	0	0	0	0	1	42.2222	0
89	0	1	21	0	0	0	0	0	0	0	0	0	0	0	0	0	0	0	0	0	0	0	0	1	12.2222	0
90	1	0	35	0	0	1	0	0	0	0	1	0	0	0	0	0	0	0	0	0	0	0	0	1	49.444	0
91	0	1	33	0	0	0	0	0	0	0	0	1	0	0	0	0	0	0	0	0	0	0	0	1	56.6646	0
92	1	0	80	0	0	0	0	0	0	0	0	0	0	1	0	0	0	0	0	0	0	1	1	1	119.12	1
93	1	1	86	0	0	0	0	0	0	0	0	0	0	0	0	0	0	0	0	0	0	1	0	1	106.111	1
94	0	1	28	0	0	0	0	0	0	0	0	0	0	0	0	0	0	0	0	0	0	0	0	1	20	0
95	0	0	45	1	1	0	1	0	0	0	0	0	0	0	0	0	0	0	0	0	0	1	0	1	74.2656	0
96	1	1	51	0	0	1	0	0	0	0	0	0	0	1	0	0	0	0	0	0	0	1	0	1	86.898	1
97	1	0	61	0	0	0	0	0	0	0	0	0	0	1	0	0	0	0	0	0	0	1	1	1	98.0091	1
98	0	1	35	0	0	0	1	0	0	0	0	0	0	0	0	0	0	0	0	0	0	1	0	1	41.9307	0
99	1	0	43	0	0	0	0	0	0	0	0	0	0	1	0	0	0	0	0	0	0	1	0	1	78.0091	1
100	0	1	33	0	0	0	0	0	0	0	0	0	0	0	0	0	0	0	0	0	0	0	0	1	25.5556	0
101	0	1	36	0	0	0	0	0	0	0	0	0	0	0	0	0	0	0	0	0	0	0	0	1	28.8889	0
102	1	0	50	0	0	0	0	0	0	0	0	0	0	0	0	0	0	0	0	0	0	0	0	1	66.1107	0
103	0	0	50	0	0	1	0	0	0	0	0	0	0	0	1	0	0	0	0	0	0	1	0	1	44.4444	0
104	0	1	22	0	0	0	0	0	0	0	0	0	1	0	0	0	0	0	0	0	0	0	0	1	13.3333	0
105	0	1	39	0	0	0	0	0	0	0	0	0	0	0	0	0	0	0	0	0	0	0	0	1	32.2222	0
106	0	1	18	0	0	0	0	0	0	0	0	0	0	0	0	0	0	0	0	0	0	0	0	1	8.88889	0
107	1	0	43	0	0	0	0	0	0	0	0	0	0	0	0	0	0	0	0	0	0	1	0	1	58.3329	0
108	1	1	46	0	0	0	0	0	0	0	0	0	0	0	0	0	0	0	0	0	0	1	1	1	61.6662	0
109	1	0	62	0	0	0	0	0	0	0	0	0	0	0	0	0	0	0	0	0	0	1	0	1	79.444	1
110	0	1	33	0	0	0	0	0	0	0	0	0	0	0	0	0	0	0	0	0	0	0	0	1	25.5556	0
111	0	1	21	1	1	0	0	0	0	0	0	0	1	0	0	0	0	0	0	0	0	1	0	1	33.446	0
112	0	0	53	0	0	0	0	0	0	0	0	0	0	0	1	0	0	0	0	0	0	1	0	1	47.7778	0
113	1	1	60	0	0	0	0	0	0	0	0	0	0	0	0	0	0	0	0	0	0	1	1	1	77.2218	1
114	1	0	49	0	0	0	0	0	0	0	0	0	0	0	0	0	0	0	0	0	0	0	0	1	64.9995	0
115	1	0	22	0	0	1	0	0	0	0	0	1	0	1	0	0	0	0	0	0	0	1	0	1	85.7848	1
116	1	1	68	0	0	1	0	0	0	0	0	0	0	0	0	0	0	0	0	0	0	0	0	1	86.1107	1
117	1	0	70	0	0	0	0	0	0	0	1	0	0	0	0	0	0	0	0	0	0	1	0	1	88.3329	1
118	0	1	35	0	0	0	0	0	0	0	0	0	0	0	0	0	0	0	0	0	0	0	0	1	27.7778	0
119	0	0	34	0	0	0	0	0	0	0	0	0	0	0	0	0	0	0	0	0	0	0	0	1	26.6667	0
120	0	1	33	0	0	0	0	0	0	0	0	0	1	0	0	0	0	0	0	0	0	1	0	1	25.5556	0
121	0	1	33	0	0	0	0	0	0	0	1	0	0	0	0	0	0	0	0	0	0	1	0	1	25.5556	0
122	0	1	36	0	0	0	0	0	0	0	0	0	0	0	0	0	0	0	0	0	0	0	0	1	28.8889	0
123	0	0	43	0	0	0	0	0	1	0	0	0	0	0	0	0	0	0	0	0	0	0	0	1	36.6667	0
124	0	1	36	0	0	0	0	0	0	0	0	0	1	0	0	0	0	0	0	0	0	0	0	1	28.8889	0
125	0	1	26	0	0	0	0	0	0	0	0	0	0	0	0	0	0	0	0	0	0	1	0	1	17.7778	0
126	1	0	84	0	0	0	0	1	1	0	0	0	0	0	1	0	0	0	0	0	1	1	1	1	142.061	1
127	1	0	37	0	0	1	0	0	0	0	0	0	0	0	0	0	0	0	0	0	0	0	0	1	51.6662	0
128	1	1	43	1	1	0	1	0	0	0	0	0	0	0	0	0	0	0	0	0	0	1	0	1	93.7096	1
129	0	1	34	0	1	0	0	0	0	0	0	0	1	0	0	0	0	0	0	0	0	1	0	1	26.6667	0
130	0	1	31	0	0	1	0	0	0	0	1	0	0	0	0	0	0	0	0	0	0	1	0	1	23.3333	0
131	0	1	31	0	0	0	0	0	0	0	0	0	0	0	0	0	0	0	0	0	0	0	0	1	23.3333	0
132	1	1	29	1	1	0	0	0	0	0	0	0	0	0	0	0	0	0	0	0	0	0	0	1	64.0011	0
133	0	0	53	0	0	1	0	0	0	0	0	0	0	0	0	0	0	0	0	0	0	1	0	1	47.7778	0
134	0	0	36	0	0	0	0	0	0	0	0	0	0	0	0	0	0	0	0	0	0	0	0	1	28.8889	0
135	1	0	45	0	0	0	0	0	0	0	0	0	0	0	0	0	0	0	0	0	0	0	0	1	60.5551	0
136	0	1	24	0	0	0	0	0	0	0	0	0	0	0	0	0	0	0	0	0	0	0	0	1	15.5556	0
137	0	1	29	1	1	0	1	0	0	0	0	0	1	0	0	0	0	0	0	0	0	1	0	1	56.4878	0
138	0	1	24	0	0	0	0	0	0	0	0	0	0	1	0	0	0	0	0	0	0	0	0	1	35.2318	0
139	0	1	22	0	0	0	0	0	0	0	1	0	0	0	0	0	0	0	0	0	0	0	0	1	13.3333	0
140	0	1	28	0	0	0	0	0	0	0	0	0	0	0	0	0	0	0	0	0	0	0	0	1	20	0
141	0	1	34	0	1	0	0	0	0	0	0	0	0	0	0	0	0	0	0	0	0	1	0	1	26.6667	0
142	1	0	60	0	0	0	0	0	0	0	0	1	0	0	0	0	0	0	1	0	0	1	1	1	145.271	1
143	1	0	37	0	0	0	0	0	0	0	0	0	0	1	0	0	0	0	0	0	0	1	0	1	71.3424	0
144	1	0	65	0	0	0	0	0	0	0	0	0	0	0	0	0	0	0	0	0	0	0	0	1	82.7773	1
145	1	1	56	1	0	0	0	0	0	0	0	1	0	1	0	0	0	0	0	0	0	1	1	1	144.786	1
146	1	0	30	0	0	1	0	0	0	0	0	0	0	0	0	0	0	0	0	0	0	1	0	1	43.8884	0
147	0	1	40	0	0	0	0	0	0	0	0	0	1	0	0	0	0	0	0	0	0	0	0	1	33.3333	0
148	0	1	30	1	1	0	1	0	0	0	0	0	0	0	0	0	0	0	0	0	0	1	0	1	57.5989	0
149	0	1	28	0	0	1	0	0	0	0	0	0	0	0	0	0	0	1	0	0	0	0	0	1	20	0
150	0	1	22	1	1	0	1	0	0	0	1	0	0	0	0	0	0	0	0	0	0	0	0	1	48.71	0
151	0	0	44	0	0	0	0	0	0	0	0	0	0	0	0	0	0	0	0	0	0	0	0	1	37.7778	0
152	1	1	67	0	0	1	0	0	1	0	0	0	0	0	0	0	0	0	0	0	0	0	0	1	84.9995	1
153	1	1	68	0	1	0	0	0	0	0	0	0	0	1	0	0	0	0	0	0	0	1	1	1	105.787	1
154	1	1	69	0	0	0	0	0	0	1	0	0	0	0	0	0	0	0	0	0	0	1	1	1	148.408	1
155	0	1	30	0	1	0	0	0	0	0	0	0	0	0	0	0	0	0	0	0	0	0	0	1	22.2222	0
156	1	0	52	0	0	0	0	0	0	0	0	0	0	0	0	0	0	0	0	0	1	1	1	1	68.3329	0
157	1	0	36	0	0	1	0	0	0	0	0	0	1	0	0	0	0	0	0	0	0	1	0	1	50.5551	0
158	0	1	30	0	0	0	0	0	0	0	0	0	0	0	0	0	0	0	0	0	0	0	0	1	22.2222	0
159	0	1	37	0	0	0	0	0	0	0	0	0	0	0	0	0	0	0	0	0	0	0	0	1	30	0
160	1	1	92	0	0	0	0	0	0	0	0	0	0	0	0	0	0	0	0	0	0	1	0	1	112.777	1
161	0	1	44	0	0	0	0	0	0	0	0	0	0	0	0	0	0	0	0	0	0	1	0	1	37.7778	0
162	1	1	22	0	0	0	0	0	0	0	0	0	0	0	0	0	0	0	0	0	0	0	0	1	34.9995	0
163	0	1	45	0	0	1	0	0	0	0	0	0	1	0	0	0	0	0	0	0	0	0	0	1	38.8889	0
164	0	1	21	0	0	0	0	0	0	0	0	0	1	1	0	0	0	0	0	0	0	1	0	1	31.8985	0
165	1	1	26	0	0	0	0	0	0	0	0	0	0	0	0	0	0	0	0	0	0	0	0	1	39.444	0
166	0	1	26	0	1	0	0	0	0	0	0	0	0	0	0	0	0	0	0	0	0	0	0	1	17.7778	0
167	0	1	33	0	1	0	0	0	0	0	0	0	0	0	0	0	0	0	0	0	0	0	0	1	25.5556	0
168	0	1	26	0	0	0	0	0	0	0	0	0	0	0	0	0	0	0	1	0	0	1	0	1	54.7183	0
169	1	1	78	0	0	0	0	0	1	0	0	0	0	1	0	0	0	0	0	0	0	1	1	1	116.898	1
170	0	1	49	0	0	0	0	0	0	0	0	0	0	0	0	0	0	0	0	0	0	0	0	1	43.3333	0
171	1	0	67	0	0	1	0	0	0	0	0	0	0	1	0	0	0	0	0	0	0	1	0	1	104.676	1
172	0	1	22	0	1	0	0	0	0	0	1	0	0	0	0	0	0	0	0	0	0	0	0	1	13.3333	0
173	1	1	56	1	1	0	1	0	0	0	0	1	0	0	0	0	0	0	0	0	0	0	0	1	139.263	1
174	1	1	73	0	0	0	0	0	0	0	0	0	0	0	0	0	0	0	0	0	0	1	0	1	91.6662	1
175	1	1	26	0	0	0	0	0	0	0	0	0	0	0	0	0	0	0	0	0	0	0	0	1	39.444	0
176	1	0	66	0	0	0	0	0	1	1	0	0	0	0	0	0	0	0	0	0	0	1	1	1	145.074	1
177	0	1	26	0	0	0	0	0	0	0	0	0	0	0	0	0	0	0	0	0	0	0	0	1	17.7778	0
178	1	1	70	0	0	1	0	0	0	0	0	0	0	0	0	0	0	0	0	0	0	1	0	1	88.3329	1
179	0	1	20	0	0	0	0	0	0	0	0	0	0	0	0	0	0	0	0	0	0	0	0	1	11.1111	0
180	0	1	50	0	0	0	0	0	0	0	0	0	0	0	0	0	0	0	0	0	0	0	0	1	44.4444	0
181	1	0	74	1	1	0	1	0	1	0	0	0	0	0	0	0	0	1	0	0	0	1	0	1	128.154	1
182	1	1	78	0	0	1	0	0	0	0	0	0	0	0	0	0	0	0	0	0	0	0	0	1	97.2218	1
183	0	0	23	0	0	0	0	0	0	0	0	0	0	0	0	0	0	0	0	0	0	1	0	1	14.4444	0
184	0	1	31	1	1	0	1	0	0	0	0	0	0	0	0	0	0	0	0	0	0	0	0	1	58.71	0
185	0	0	62	0	0	1	0	0	0	0	0	0	0	0	1	0	0	0	0	0	0	0	0	1	57.7778	0
186	0	0	23	0	0	0	0	0	0	0	0	1	0	0	0	0	0	0	0	0	0	0	0	1	45.5535	0
187	1	0	64	0	0	1	0	0	0	0	0	1	0	0	0	0	0	0	0	0	0	1	1	1	112.775	1
188	0	1	51	0	0	1	0	0	0	0	0	0	0	0	0	0	0	0	0	0	0	1	0	1	45.5555	0
189	1	1	81	0	1	0	0	0	0	0	0	0	0	0	0	0	0	0	0	0	1	0	0	1	100.555	1
190	0	1	33	0	0	1	0	0	0	0	1	0	0	0	0	0	0	0	0	0	0	0	0	1	25.5556	0
191	0	1	30	0	0	0	0	0	0	0	0	0	0	1	0	0	0	0	0	0	0	1	0	1	41.8985	0
192	1	0	44	0	0	0	1	0	0	0	0	0	0	1	0	0	0	0	0	0	0	0	0	1	93.2731	1
193	0	1	29	0	0	0	0	0	0	0	0	0	0	0	0	0	0	0	0	0	0	0	0	1	21.1111	0
194	1	1	52	0	0	0	0	0	0	0	0	0	0	0	0	0	0	0	0	0	0	0	0	1	68.3329	0
195	0	1	34	0	0	0	0	0	0	0	0	0	0	0	0	0	0	0	0	0	0	0	0	1	26.6667	0
196	1	1	40	0	0	0	0	0	0	0	0	0	1	0	0	0	0	0	0	0	0	1	0	1	54.9995	0
197	0	1	23	1	1	0	1	0	0	0	0	0	0	0	0	0	0	0	0	0	0	0	0	1	49.8211	0
198	1	0	41	0	0	1	0	0	0	0	0	0	0	0	0	0	0	0	0	0	0	0	0	1	56.1107	0
199	0	1	24	0	0	0	0	0	0	0	0	0	0	0	0	0	0	0	0	0	0	0	0	1	15.5556	0
200	0	1	46	0	0	0	0	0	0	0	0	0	0	0	0	0	0	0	0	0	0	1	0	1	40	0
201	0	1	26	0	0	0	0	0	0	0	0	0	0	0	0	0	0	0	0	0	0	0	0	1	17.7778	0
202	1	1	38	0	0	1	0	0	0	0	0	0	0	0	0	0	0	0	0	0	0	1	0	1	52.7773	0
203	0	1	35	0	0	0	0	0	0	0	0	0	0	0	0	0	0	0	0	0	0	1	0	1	27.7778	0
204	0	1	29	1	0	0	0	0	0	0	0	0	0	0	0	0	0	0	0	0	0	1	0	1	42.3349	0
205	1	1	53	1	1	0	1	0	0	0	0	0	0	1	0	0	0	0	0	0	0	1	0	1	124.497	1
206	0	1	34	0	0	0	0	0	0	0	0	0	0	0	0	0	0	0	0	0	0	1	0	1	26.6667	0
207	0	1	21	0	0	0	0	0	0	0	1	0	0	0	0	0	0	0	0	0	0	0	0	1	12.2222	0
208	1	0	62	0	0	1	0	0	0	0	0	0	0	0	0	0	0	0	0	0	0	0	0	1	79.444	1
209	0	1	30	0	0	1	0	0	0	0	0	0	0	0	0	0	0	0	0	0	0	0	0	1	22.2222	0
210	1	0	26	0	0	0	0	0	0	0	0	0	0	0	0	0	0	0	0	0	0	0	0	1	39.444	0
211	1	1	39	0	0	0	0	1	1	0	0	0	0	0	0	0	0	0	0	0	0	1	1	1	92.0614	1
212	1	1	63	1	1	0	0	1	1	0	0	1	0	0	0	0	0	0	0	0	0	1	0	1	171.061	1
213	1	0	50	0	0	1	0	0	0	0	0	0	0	0	0	0	0	0	0	0	0	1	0	1	66.1107	0
214	0	1	28	0	0	0	0	0	0	0	1	0	0	0	0	0	0	0	0	0	0	0	0	1	20	0
215	1	1	46	0	0	0	0	0	0	0	0	0	0	0	0	0	0	0	0	0	0	0	0	1	61.6662	0
216	0	0	20	0	0	0	0	0	0	0	1	0	0	0	0	0	0	0	0	0	0	0	0	1	11.1111	0
217	1	1	66	1	1	0	1	1	1	0	0	0	0	0	0	0	0	0	0	0	0	0	0	1	157.438	1
218	0	1	22	1	1	0	0	0	0	0	0	0	0	0	0	0	0	0	0	0	0	1	0	1	34.5571	0
219	0	1	47	1	1	0	1	0	0	0	0	0	0	0	0	0	0	0	0	0	0	1	1	1	76.4878	1
220	1	1	63	0	0	0	0	0	0	0	0	0	0	0	1	0	0	0	0	0	0	1	1	1	80.5551	1
221	0	1	56	0	0	0	0	0	0	0	0	0	0	0	0	0	0	0	0	0	1	1	0	1	51.1111	0
222	0	1	45	0	0	0	0	0	0	0	1	0	0	0	1	0	0	0	0	0	0	0	0	1	38.8889	0
223	0	0	52	0	1	0	0	0	0	0	0	0	0	0	0	0	0	0	0	0	0	1	0	1	46.6667	0
224	1	0	59	1	1	0	1	0	0	1	0	0	0	0	1	0	0	0	0	0	1	1	1	1	172.673	1
225	0	1	64	0	0	0	0	0	0	0	0	1	0	0	0	0	0	0	0	0	0	1	0	1	91.109	1
226	1	0	58	0	0	0	0	0	0	0	0	0	0	0	0	0	0	0	0	0	0	1	0	1	74.9995	0
227	0	1	53	0	0	0	0	0	0	0	1	0	0	0	0	0	0	0	0	0	0	1	0	1	47.7778	0
228	0	1	26	1	1	0	1	0	0	0	0	0	0	0	0	0	0	0	0	0	0	0	0	1	53.1545	0
229	1	1	33	0	0	0	0	0	0	0	0	0	0	0	0	0	0	0	0	0	0	0	0	1	47.2218	0
230	0	1	30	0	0	0	0	0	0	0	0	0	0	1	0	0	0	0	1	0	0	0	0	1	78.8389	1
231	0	1	42	1	0	0	0	0	0	0	0	0	0	0	0	0	0	0	0	0	0	0	0	1	56.7793	0
232	0	0	47	0	0	0	0	0	0	0	0	0	0	0	0	0	0	0	0	0	0	0	0	1	41.1111	0
233	0	1	44	0	0	0	0	0	0	0	0	0	0	0	0	0	0	0	0	0	0	1	0	1	37.7778	0
234	0	0	47	0	0	1	0	0	0	0	0	0	1	0	0	0	0	0	0	0	0	1	0	1	41.1111	0
235	0	1	54	0	0	0	0	0	0	0	0	1	0	0	1	0	0	0	0	0	0	1	0	1	79.9979	1
236	0	1	49	0	0	0	0	0	0	0	0	0	0	0	0	0	0	0	0	0	0	0	0	1	43.3333	0
237	1	0	54	0	0	0	0	0	0	0	0	0	0	0	0	0	0	0	0	0	0	0	0	1	70.5551	0
238	0	1	43	0	0	1	0	0	0	0	0	0	0	0	0	0	0	0	0	0	0	1	0	1	36.6667	0
239	1	0	56	0	0	1	0	0	0	0	0	0	0	0	0	0	0	0	0	0	0	0	0	1	72.7773	0
240	0	1	34	0	0	0	0	0	0	0	0	0	0	0	0	0	0	0	0	0	0	0	0	1	26.6667	0
241	0	1	64	0	0	1	0	0	0	0	0	0	0	0	1	0	0	0	0	0	0	0	0	1	60	0
242	0	1	31	0	0	0	0	0	0	0	0	0	0	0	1	0	0	0	0	0	0	0	0	1	23.3333	0
243	1	0	42	0	0	0	0	0	0	0	0	0	1	0	0	0	0	0	0	0	0	1	0	1	57.2218	0
244	1	1	37	0	0	0	0	0	0	0	0	0	0	1	0	0	0	0	0	0	0	1	0	1	71.3424	0
245	1	1	74	0	0	0	0	0	1	0	0	0	0	0	0	0	0	0	0	0	1	1	0	1	92.7773	1
246	1	0	62	0	0	0	0	0	0	0	0	0	0	1	0	0	0	0	0	0	0	1	0	1	99.1202	1
247	0	0	57	0	0	1	0	0	0	0	0	0	1	0	0	0	0	0	0	0	0	1	0	1	52.2222	0
248	0	1	44	0	0	0	0	0	0	0	0	0	0	0	1	0	0	0	0	0	0	0	0	1	37.7778	0
249	0	1	33	0	0	0	0	0	0	0	1	0	0	0	0	0	0	0	0	0	0	0	0	1	25.5556	0
250	1	1	55	0	0	0	0	0	0	0	0	0	0	0	1	0	0	0	0	0	0	0	0	1	71.6662	0
251	0	1	24	0	0	0	0	0	0	0	0	0	0	0	0	0	0	0	0	0	0	1	0	1	15.5556	0
252	1	1	24	0	0	0	0	0	0	0	0	0	0	0	0	0	0	0	0	0	0	0	0	1	37.2218	0
253	0	0	51	0	0	0	0	0	0	0	0	0	0	0	0	0	0	0	0	0	0	0	0	1	45.5555	0
254	0	1	34	0	0	0	0	0	0	0	0	0	0	1	0	0	0	0	0	0	0	0	0	1	46.3429	0
255	1	1	68	0	0	0	1	0	0	0	0	0	0	1	0	0	0	0	0	0	0	1	1	1	119.94	1
256	0	1	26	1	0	0	0	0	0	0	0	0	1	0	0	0	0	0	0	0	0	0	0	1	39.0016	0
257	0	1	26	0	0	0	0	0	0	0	0	0	0	0	0	0	0	0	0	0	0	1	0	1	17.7778	0
258	1	0	48	0	0	0	0	0	0	0	0	0	1	0	0	0	0	0	0	0	0	1	0	1	63.8884	0
259	0	1	46	0	0	0	0	0	0	0	0	0	0	0	0	0	0	0	0	0	0	0	0	1	40	0
260	1	1	66	0	0	0	0	0	0	0	0	0	0	0	0	0	0	0	0	0	0	0	0	1	83.8884	1
261	1	1	23	0	0	0	0	0	0	0	0	0	0	0	0	0	0	0	1	0	0	0	0	1	73.0512	0
262	0	1	40	0	0	0	0	0	0	0	0	0	0	0	0	0	0	0	0	0	0	0	0	1	33.3333	0
263	0	1	83	0	0	0	0	0	0	0	0	0	0	0	0	0	0	0	0	0	0	1	0	1	81.1111	1
264	1	1	71	0	0	0	0	0	0	0	0	0	0	0	0	0	0	0	0	0	0	0	0	1	89.444	1
265	0	1	43	0	0	1	0	0	0	0	0	1	0	0	0	0	0	0	0	0	0	1	0	1	67.7757	0
266	0	1	50	0	0	0	0	0	0	0	0	0	0	0	0	0	0	0	1	0	0	0	0	1	81.3849	1
267	1	1	69	0	0	0	0	0	0	1	0	0	0	0	0	0	0	0	0	0	0	1	1	1	148.408	1
268	0	1	40	0	0	0	0	0	0	0	0	0	0	0	0	0	0	0	0	0	0	1	0	1	33.3333	0
269	1	1	60	0	0	0	0	0	0	0	0	0	1	0	0	0	0	0	0	0	0	1	0	1	77.2218	1
270	0	1	41	0	0	0	0	0	0	0	0	0	0	0	0	0	0	0	0	0	0	0	0	1	34.4444	0
271	0	1	33	0	0	1	0	0	0	0	1	0	0	0	1	0	0	0	0	0	0	1	0	1	25.5556	0
272	0	1	43	0	0	0	0	0	0	0	0	0	0	0	0	0	0	0	0	0	0	0	0	1	36.6667	0
273	0	1	25	0	0	0	0	0	0	0	0	0	0	0	0	0	0	0	0	0	0	0	0	1	16.6667	0
274	0	1	50	0	0	1	0	0	0	0	0	0	0	0	0	0	0	0	0	0	0	0	0	1	44.4444	0
275	0	1	42	0	0	0	0	0	0	0	0	0	0	0	0	0	0	0	0	0	0	0	0	1	35.5556	0
276	1	0	68	0	0	0	0	0	0	0	0	0	0	1	0	0	0	0	0	0	0	1	0	1	105.787	1
277	0	1	29	0	0	1	0	0	0	0	0	0	0	0	0	0	0	0	0	0	0	1	0	1	21.1111	0
278	0	1	24	0	0	0	0	0	0	0	0	0	0	0	0	0	0	0	0	0	0	0	0	1	15.5556	0
279	0	1	42	0	0	0	0	0	0	0	0	0	1	0	0	0	0	0	0	0	0	0	0	1	35.5556	0
280	0	1	23	0	0	0	0	0	0	0	0	0	0	1	0	0	0	0	0	0	0	0	0	1	34.1207	0
281	0	1	38	1	1	0	0	0	0	0	1	0	0	0	0	0	0	0	0	0	0	1	0	1	52.3349	0
282	0	1	43	0	0	0	0	0	0	0	0	0	0	0	0	0	0	0	0	0	0	0	0	1	36.6667	0
283	0	1	38	1	0	0	0	0	0	0	1	0	0	0	1	0	0	0	0	0	0	1	0	1	52.3349	0
284	1	1	33	1	0	0	0	0	0	0	0	0	0	0	0	0	0	0	0	0	0	0	0	1	68.4456	0
285	0	1	30	0	0	0	0	0	0	0	0	0	0	1	0	0	0	0	0	0	0	0	0	1	41.8985	0
286	0	1	33	0	0	0	0	0	0	0	0	0	0	0	0	0	0	0	0	0	0	0	0	1	25.5556	0
287	1	0	29	0	0	1	0	0	0	0	0	0	0	0	0	0	0	0	0	0	0	0	0	1	42.7773	0
288	1	0	59	0	0	0	0	0	0	0	0	0	0	1	0	0	0	0	1	0	0	0	0	1	132.727	1
289	0	0	47	0	0	0	0	0	0	0	0	0	0	1	0	0	0	0	0	0	0	0	0	1	60.7873	0
290	1	0	75	1	1	0	1	0	1	1	0	0	0	0	0	0	0	0	0	0	0	1	1	1	190.451	1
291	1	1	82	0	1	0	0	0	0	0	0	0	0	1	0	0	0	0	0	0	0	1	1	1	121.342	1
292	0	0	26	1	0	0	1	0	0	0	0	0	0	1	0	0	0	0	0	0	0	0	0	1	72.8307	0
293	1	0	33	0	0	1	0	0	0	0	0	0	1	0	0	0	0	0	0	0	0	1	0	1	47.2218	0
294	0	1	23	1	1	0	0	0	0	0	0	0	0	0	0	0	0	0	0	0	0	0	0	1	35.6682	0
295	0	1	23	1	0	0	0	0	0	0	0	0	0	0	0	0	0	0	0	0	0	0	0	1	35.6682	0
296	1	0	66	0	0	0	0	0	0	0	0	0	0	0	0	0	0	0	0	0	0	0	0	1	83.8884	1
297	1	1	59	0	0	0	0	0	0	0	0	0	0	0	0	0	0	0	0	0	0	1	0	1	76.1107	1
298	1	0	75	0	0	1	0	0	0	0	0	0	0	0	0	0	0	0	0	0	0	0	0	1	93.8884	1
299	0	1	33	1	1	0	0	0	0	0	0	0	1	0	0	0	0	0	0	0	0	1	0	1	46.7793	0
300	1	1	55	0	0	0	0	1	1	0	0	0	1	0	0	0	0	0	0	0	0	1	1	1	109.839	1
301	0	1	45	0	0	0	0	0	0	0	0	0	0	0	0	0	0	0	0	0	0	0	0	1	38.8889	0
302	1	0	49	0	0	1	0	0	0	0	0	0	1	0	0	0	0	0	0	0	0	1	0	1	64.9995	0
303	0	1	27	0	0	0	0	0	0	0	0	0	0	0	0	0	0	0	0	0	0	0	0	1	18.8889	0
304	1	1	61	0	0	1	0	0	0	0	0	0	0	1	0	0	0	0	0	0	0	1	0	1	98.0091	1
305	0	1	32	0	0	0	0	0	0	0	0	0	0	0	0	0	0	0	0	0	0	0	0	1	24.4444	0
306	0	1	55	0	0	1	0	0	1	0	0	0	1	0	0	0	0	0	0	0	0	0	0	1	50	0
307	0	0	50	0	0	0	0	0	0	0	0	0	0	0	0	0	0	0	0	0	0	1	0	1	44.4444	0
308	1	0	46	0	0	0	0	0	0	0	0	0	0	0	0	0	0	0	0	0	0	0	0	1	61.6662	0
309	0	1	40	0	0	0	0	0	0	0	0	0	0	0	0	0	0	0	0	0	0	1	0	1	33.3333	0
310	1	1	69	1	1	0	1	0	0	0	0	0	0	0	0	0	0	0	0	0	0	1	1	1	122.598	1
311	1	0	65	0	0	1	0	0	0	0	0	0	0	0	0	0	0	0	0	0	0	0	0	1	82.7773	1
312	1	1	43	0	0	0	0	0	0	0	0	0	0	0	0	0	0	0	0	0	0	1	0	1	58.3329	0
313	1	1	50	0	0	1	0	0	0	0	0	0	1	1	0	0	0	0	0	0	0	0	0	1	85.7869	1
314	0	1	25	0	0	0	0	0	0	0	1	0	0	0	0	0	0	0	0	0	0	0	0	1	16.6667	0
315	0	0	46	0	0	0	0	0	0	0	0	0	0	1	0	0	0	0	0	0	0	0	0	1	59.6762	0
316	1	1	40	0	0	1	0	0	0	0	0	0	0	0	1	0	0	0	0	0	0	1	0	1	54.9995	0
317	1	0	77	0	0	0	0	0	0	0	0	0	0	0	0	0	0	0	0	0	0	1	0	1	96.1107	1
318	0	1	32	0	0	0	0	0	0	0	0	0	0	0	0	0	0	0	0	0	0	0	0	1	24.4444	0
319	0	0	38	0	0	1	0	0	0	0	0	0	0	0	0	0	0	0	0	0	0	0	0	1	31.1111	0
320	1	1	21	1	0	0	0	0	0	0	1	0	0	0	0	0	0	0	0	0	0	1	0	1	55.1122	0
321	0	1	34	0	0	1	0	0	0	0	0	0	0	0	0	0	0	0	0	0	0	1	0	1	26.6667	0
322	0	1	40	0	0	0	0	0	0	0	0	0	1	0	0	0	0	0	0	0	0	1	0	1	33.3333	0
323	0	1	37	0	0	0	0	0	0	0	0	0	0	0	0	0	0	0	0	0	0	0	0	1	30	0
324	0	0	56	0	0	0	0	0	0	0	0	1	0	1	0	0	0	0	0	0	0	0	0	1	101.896	1
325	0	1	31	0	0	1	0	0	0	0	1	0	0	0	0	0	0	0	0	0	0	0	0	1	23.3333	0
326	0	1	44	0	1	0	0	0	0	0	0	0	1	0	0	0	0	0	0	0	0	1	0	1	37.7778	0
327	0	0	34	0	0	0	0	0	0	0	0	0	0	0	0	0	0	0	0	0	0	0	0	1	26.6667	0
328	0	1	24	1	1	0	1	0	0	0	0	0	0	0	0	0	0	0	0	0	0	0	0	1	50.9322	0
329	0	1	20	1	0	0	0	0	0	0	0	0	0	0	0	0	0	0	0	0	0	0	0	1	32.3349	0
330	1	0	67	1	1	0	1	0	0	0	0	0	0	1	0	0	0	0	0	0	0	1	1	1	140.052	1
331	1	0	69	0	0	0	0	0	0	0	0	0	0	0	0	0	0	0	0	0	0	1	0	1	87.2218	1
332	1	1	65	0	0	0	0	0	0	1	0	0	0	0	0	0	0	0	0	0	0	1	1	1	143.963	1
333	1	0	40	0	0	0	0	0	0	0	0	0	0	1	0	0	0	0	0	0	0	0	0	1	74.6758	0
334	0	1	49	0	0	0	0	0	0	0	0	0	0	0	0	0	0	0	0	0	0	0	0	1	43.3333	0
335	0	1	46	0	0	0	0	0	0	0	0	0	0	0	0	0	0	0	0	0	0	1	0	1	40	0
336	0	1	48	0	0	1	0	0	0	0	0	0	0	0	0	0	0	0	0	0	0	1	0	1	42.2222	0
337	0	1	35	0	0	0	0	0	0	0	0	0	0	0	0	0	0	0	0	0	0	0	0	1	27.7778	0
338	0	1	25	0	0	0	0	0	0	0	1	0	0	0	0	0	0	0	0	0	0	0	0	1	16.6667	0
339	1	1	41	0	0	0	0	0	0	0	0	0	0	0	0	0	0	0	0	0	0	0	0	1	56.1107	0
340	0	1	36	1	1	0	0	0	0	0	0	0	0	0	0	0	0	0	0	0	0	0	0	1	50.1127	0
341	0	1	49	0	0	0	0	0	0	0	0	0	0	0	0	0	0	0	0	0	0	1	0	1	43.3333	0
342	0	1	36	1	1	0	1	0	0	0	0	0	0	0	0	0	0	0	0	0	0	1	0	1	64.2656	0
343	1	1	30	0	0	1	0	0	0	0	0	0	0	0	0	0	0	0	0	0	0	0	0	1	43.8884	0
344	0	1	31	0	0	0	0	0	0	0	0	0	0	0	0	0	0	0	0	0	0	0	0	1	23.3333	0
345	0	0	23	0	0	0	0	0	0	0	0	0	0	0	0	0	0	0	0	0	0	1	0	1	14.4444	0
346	0	1	49	0	1	0	0	0	0	0	0	0	0	0	0	0	0	0	0	0	0	0	0	1	43.3333	0
347	0	1	22	0	0	0	0	0	0	0	0	0	0	0	0	0	0	0	0	0	0	0	0	1	13.3333	0
348	0	0	26	0	0	1	0	0	0	0	0	0	1	0	0	0	0	0	0	0	0	0	0	1	17.7778	0
349	1	0	75	0	0	1	0	0	0	0	0	0	1	0	0	1	0	0	0	0	0	1	0	1	93.8884	1
350	1	1	64	0	0	0	0	0	0	0	0	0	0	0	0	0	0	1	0	0	0	1	1	1	81.6662	1
351	1	1	78	0	0	0	0	0	0	0	0	0	1	0	1	0	0	0	0	0	0	1	0	1	97.2218	1
352	0	1	41	0	0	0	0	0	0	0	0	0	0	0	0	0	0	0	0	0	0	1	0	1	34.4444	0
353	0	1	42	0	1	0	0	0	0	0	0	1	0	0	0	0	0	0	0	0	0	1	0	1	66.6646	0
354	1	0	51	0	0	1	0	0	0	0	0	0	0	0	0	0	0	0	0	0	0	0	0	1	67.2218	0
355	1	1	46	0	0	0	0	0	0	0	0	0	0	0	1	0	0	1	0	0	0	0	0	1	61.6662	0
356	1	0	68	1	0	0	0	0	0	0	0	0	0	0	0	0	0	0	0	0	0	1	0	1	107.334	1
357	1	0	60	0	0	0	0	0	0	0	0	0	1	1	0	0	0	0	0	0	0	1	0	1	96.898	1
358	0	1	52	0	0	1	0	0	0	0	0	0	0	0	0	0	0	0	0	0	0	0	0	1	46.6667	0
359	1	0	28	0	0	0	0	0	0	0	0	0	0	0	0	0	0	0	0	0	0	0	0	1	41.6662	0
360	1	1	31	1	1	0	1	0	0	0	1	0	0	0	0	0	0	0	0	0	0	0	0	1	80.3762	1
361	0	1	25	0	0	0	0	0	0	0	0	0	0	0	0	0	0	0	0	0	0	0	0	1	16.6667	0
362	1	1	17	1	1	0	1	0	0	0	0	1	0	0	0	0	0	0	0	0	0	0	0	1	95.9297	1
363	1	0	26	0	0	1	0	0	0	0	0	0	0	0	0	0	0	0	0	0	0	0	0	1	39.444	0
364	0	1	53	0	0	0	0	0	0	0	0	0	0	0	0	0	0	0	0	0	0	0	0	1	47.7778	0
365	1	0	73	0	0	0	0	0	0	0	0	0	0	0	0	0	0	0	0	0	0	1	0	1	91.6662	1
366	1	0	63	0	0	0	0	0	1	0	0	1	0	0	1	0	0	0	0	0	0	0	0	1	111.664	1
367	0	0	49	0	0	0	0	0	0	0	0	0	0	1	0	0	0	0	0	0	0	0	0	1	63.0096	0
368	0	1	39	0	0	0	0	0	0	0	0	0	0	0	0	0	0	0	0	0	0	0	0	1	32.2222	0
369	0	1	35	1	0	0	0	0	0	0	0	0	0	0	0	0	0	0	0	0	0	0	0	1	49.0016	0
370	0	1	46	0	1	0	0	0	0	0	0	0	1	1	0	0	0	0	0	0	0	1	0	1	59.6762	0
371	1	1	17	0	0	0	0	0	0	0	1	0	0	0	0	0	0	0	0	0	0	1	0	1	29.444	0
372	0	1	32	0	0	0	0	0	0	0	0	0	0	0	0	0	0	0	0	0	0	0	0	1	24.4444	0
373	0	1	76	0	0	1	0	0	0	0	0	0	0	0	1	0	0	0	0	0	0	1	0	1	73.3333	0
374	0	1	22	1	1	0	0	0	0	0	0	0	1	1	0	0	0	0	0	0	0	0	0	1	54.2333	0
375	1	1	68	0	0	0	0	0	0	0	0	0	0	0	0	0	0	0	0	0	0	1	0	1	86.1107	1
376	0	1	18	0	0	0	0	0	0	0	0	0	0	0	0	0	0	0	0	0	0	0	0	1	8.88889	0
377	1	0	80	0	0	0	0	0	0	0	0	0	0	1	0	0	0	0	0	1	0	1	1	1	119.12	1
378	0	1	25	1	1	0	1	0	0	0	0	0	0	0	0	0	0	0	0	0	0	0	0	1	52.0433	0
379	0	1	27	1	0	0	0	0	0	0	0	0	0	0	0	0	0	0	0	0	0	0	0	1	40.1127	0
380	0	1	25	0	0	0	0	0	0	0	0	0	0	0	0	0	0	0	0	0	0	0	0	1	16.6667	0
381	0	1	32	0	0	0	0	0	0	0	0	0	0	0	0	0	0	0	0	0	0	0	0	1	24.4444	0
382	0	1	33	0	0	0	0	0	0	0	0	0	0	0	0	0	0	0	0	0	0	0	0	1	25.5556	0
383	1	0	26	0	0	1	0	0	0	0	0	0	0	0	0	0	0	0	0	0	0	0	0	1	39.444	0
384	0	1	36	0	0	0	1	0	0	0	0	0	0	0	0	0	0	0	0	0	0	1	0	1	43.0418	0
385	0	1	35	0	0	1	0	0	0	0	0	0	0	0	0	0	0	0	0	0	0	0	0	1	27.7778	0
386	1	0	49	0	0	1	0	0	0	0	0	0	0	1	0	0	0	0	0	0	0	0	0	1	84.6758	1
387	1	1	54	1	1	0	1	0	0	0	0	0	0	0	1	0	0	0	0	0	0	1	1	1	105.932	1
388	1	1	37	0	0	0	0	0	0	0	0	0	0	0	0	0	0	0	0	0	0	0	0	1	51.6662	0
389	0	1	31	0	0	0	0	0	0	0	1	0	0	0	0	0	0	0	0	0	0	1	0	1	23.3333	0
390	0	1	25	1	0	0	0	0	0	0	0	0	0	0	0	0	0	0	0	0	0	1	0	1	37.8904	0
391	0	1	56	1	1	0	1	0	0	0	0	0	0	1	0	0	0	0	0	0	0	1	1	1	106.164	1
392	0	1	54	0	0	0	1	0	0	0	0	0	1	0	0	0	0	0	0	0	0	1	0	1	63.0418	0
393	1	1	79	0	0	0	0	0	1	0	0	0	0	0	0	1	1	0	0	0	0	1	0	1	98.3329	1
394	0	1	42	0	0	0	0	0	0	0	0	0	0	0	0	0	0	0	0	0	0	1	0	1	35.5556	0
395	0	1	30	0	1	0	0	0	0	0	0	0	0	0	0	0	0	0	0	0	0	0	0	1	22.2222	0
396	1	1	63	1	0	0	0	0	0	0	0	1	0	0	0	0	0	0	0	0	0	0	0	1	132.888	1
397	0	1	32	0	1	0	0	0	0	0	0	0	0	0	0	0	0	0	0	0	0	1	0	1	24.4444	0
398	0	1	35	0	0	0	0	0	0	0	0	0	0	0	0	0	0	0	0	0	0	0	0	1	27.7778	0
399	1	1	80	0	0	0	0	0	0	0	0	0	0	0	0	0	0	0	0	0	0	0	0	1	99.444	1
400	0	1	33	0	0	0	0	0	0	0	0	0	0	0	0	0	0	0	0	0	0	1	0	1	25.5556	0
401	1	1	51	0	0	0	0	0	0	0	0	0	0	0	0	0	0	0	0	0	1	1	0	1	67.2218	0
402	1	0	29	0	0	0	0	0	0	0	0	0	0	0	0	0	0	0	0	0	0	0	0	1	42.7773	0
403	1	0	35	0	0	0	0	0	0	0	0	0	0	0	0	0	0	0	0	0	0	1	0	1	49.444	0
404	0	1	38	0	0	0	0	0	0	0	0	0	0	0	0	0	0	0	0	0	0	1	0	1	31.1111	0
405	0	0	44	0	0	0	0	0	0	0	0	0	0	0	0	0	0	0	0	0	0	0	0	1	37.7778	0
406	0	1	31	1	1	0	1	0	0	0	0	0	0	0	0	0	0	0	0	0	0	0	0	1	58.71	0
407	0	1	46	0	0	0	0	0	0	0	0	0	0	0	0	0	0	0	0	0	0	0	0	1	40	0
408	1	0	52	0	0	0	0	0	0	0	0	1	0	0	0	0	0	0	0	0	0	1	0	1	99.4419	1
409	0	1	37	0	0	0	1	0	0	0	0	0	0	0	0	0	0	0	0	0	0	0	0	1	44.1529	0
410	0	1	47	0	0	0	0	0	0	0	0	0	1	0	1	0	0	0	0	0	0	1	0	1	41.1111	0
411	0	1	21	0	0	0	0	0	0	0	0	0	0	0	0	0	0	0	0	0	0	0	0	1	12.2222	0
412	1	1	41	0	0	0	0	0	0	0	0	0	1	0	0	0	0	0	0	0	0	0	0	1	56.1107	0
413	1	1	83	1	1	0	1	0	1	0	0	0	0	0	0	0	0	0	0	0	0	0	0	1	138.154	1
414	0	1	27	1	1	0	1	0	0	0	0	0	0	0	0	0	0	0	0	0	0	1	0	1	54.2656	0
415	1	0	31	0	0	1	0	1	1	0	0	0	1	0	0	0	0	0	0	0	0	1	0	1	83.1725	1
416	0	1	48	1	1	0	1	0	0	0	0	0	0	1	0	0	0	0	0	0	0	0	0	1	97.2751	1
417	0	1	19	0	0	0	0	0	0	0	0	0	0	0	0	0	0	0	0	0	0	0	0	1	10	0
418	0	1	31	0	0	0	0	0	0	0	0	0	0	0	0	0	0	0	0	0	0	1	0	1	23.3333	0
419	0	1	30	1	0	0	0	0	0	0	0	0	1	0	0	0	0	0	0	0	0	0	0	1	43.446	0
420	1	0	33	0	0	0	0	0	0	0	1	0	0	0	0	0	0	0	0	0	0	0	0	1	47.2218	0
421	1	0	27	0	0	0	0	0	0	0	0	0	0	0	0	0	0	0	0	0	0	1	0	1	40.5551	0
422	1	0	22	0	0	0	0	0	0	0	0	0	0	0	0	0	0	0	0	0	0	0	0	1	34.9995	0
423	0	1	59	0	0	0	0	0	0	0	0	0	0	0	0	0	0	0	0	0	0	1	0	1	54.4444	0
424	1	1	57	0	0	0	0	0	0	0	0	0	0	1	0	0	0	0	0	0	0	1	0	1	93.5647	1
425	0	1	23	0	0	0	0	0	0	0	0	0	0	0	0	0	0	0	0	0	0	1	0	1	14.4444	0
426	1	0	47	0	0	0	0	0	0	0	0	1	0	1	0	0	0	0	0	0	0	1	0	1	113.563	1
427	0	1	34	1	1	0	1	0	0	0	0	0	1	0	0	0	0	0	0	0	0	1	0	1	62.0433	0
428	0	1	30	0	0	0	0	0	0	0	0	0	0	0	0	0	0	0	0	0	0	0	0	1	22.2222	0
429	1	0	33	1	0	1	0	0	1	0	0	0	0	0	0	0	0	0	0	0	0	0	0	1	68.4456	0
430	0	0	25	0	0	0	0	0	0	0	1	0	0	0	0	0	0	0	0	0	0	0	0	1	16.6667	0
431	0	0	21	1	0	0	0	0	0	0	0	0	0	0	0	0	0	0	0	0	0	0	0	1	33.446	0
432	0	1	20	0	0	1	0	0	0	0	1	0	0	0	0	0	0	0	0	0	0	0	0	1	11.1111	0
433	0	1	34	0	0	0	0	0	0	0	1	0	0	1	0	0	0	0	0	0	0	0	0	1	46.3429	0
434	1	1	16	0	0	0	0	0	0	0	0	0	1	0	0	0	0	0	0	0	0	0	0	1	28.3329	0
435	1	1	72	0	0	0	0	0	1	0	0	0	0	0	0	0	0	0	0	0	0	0	0	1	90.5551	1
436	0	0	22	0	0	0	0	0	0	0	1	0	0	0	0	0	0	0	0	0	0	0	0	1	13.3333	0
437	0	0	30	0	0	0	0	0	0	0	0	0	0	1	0	0	0	0	0	0	0	1	0	1	41.8985	0
438	1	0	31	0	0	1	0	1	1	0	0	0	0	0	0	0	0	0	0	0	0	0	0	1	83.1725	1
439	0	1	31	0	0	0	0	0	0	0	0	0	0	1	0	0	0	0	0	0	0	0	0	1	43.0096	0
440	0	1	23	0	0	0	0	0	0	0	0	0	1	0	0	0	0	0	0	0	0	0	0	1	14.4444	0
441	0	1	46	1	0	0	1	0	0	0	0	0	0	1	0	0	0	0	0	0	0	1	0	1	95.0529	1
442	0	1	26	0	0	0	0	0	0	0	0	0	0	0	0	0	0	0	0	0	0	0	0	1	17.7778	0
443	0	1	40	0	0	0	0	0	0	0	0	0	0	0	0	0	0	0	0	0	0	0	0	1	33.3333	0
444	0	1	32	0	0	0	0	0	0	0	0	0	0	0	0	0	0	0	0	0	0	0	0	1	24.4444	0
445	1	1	56	0	0	0	0	0	0	0	0	0	0	0	1	0	0	0	0	0	0	1	1	1	72.7773	0
446	1	1	21	0	0	0	0	0	0	0	1	0	0	0	0	0	0	0	0	0	0	0	0	1	33.8884	0
447	0	1	19	1	1	0	1	0	0	0	1	0	0	0	0	0	0	0	0	0	0	1	0	1	45.3767	0
448	1	1	42	1	1	0	1	0	0	0	0	0	0	0	0	0	0	0	1	0	0	1	1	1	129.539	1
449	1	0	73	0	0	0	0	0	0	1	0	0	0	1	0	0	0	1	0	0	0	1	1	1	172.528	1
450	0	1	22	0	1	0	0	0	0	0	0	0	0	0	0	0	0	0	0	0	0	0	0	1	13.3333	0
451	1	0	58	0	0	0	0	0	0	0	0	0	0	0	1	0	0	0	0	0	0	0	0	1	74.9995	0
452	0	1	33	0	0	0	0	0	0	0	1	0	0	0	0	0	0	0	0	0	0	0	0	1	25.5556	0
453	1	0	77	0	0	0	0	0	0	0	0	0	0	0	0	0	0	0	0	0	1	0	0	1	96.1107	1
454	0	0	25	0	0	1	0	0	0	0	0	0	0	0	0	0	0	0	0	0	0	0	0	1	16.6667	0
455	0	1	54	0	0	0	0	0	0	0	0	0	0	0	0	0	0	0	0	0	0	0	0	1	48.8889	0
456	0	1	29	0	0	0	0	0	0	0	0	0	0	0	0	0	0	0	0	0	0	1	0	1	21.1111	0
457	0	1	55	0	0	0	0	0	0	0	1	0	0	0	0	0	0	0	0	0	0	0	0	1	50	0
458	0	1	22	0	0	0	0	0	0	0	1	0	0	0	0	0	0	0	0	0	0	0	0	1	13.3333	0
459	0	1	31	1	1	0	1	0	0	0	0	0	0	0	0	0	0	0	0	0	0	0	0	1	58.71	0
460	1	1	73	0	0	0	0	0	0	0	0	0	0	1	0	0	0	0	0	0	0	0	0	1	111.342	1
461	0	1	31	0	0	1	0	0	0	0	0	0	0	0	0	0	0	0	0	0	0	0	0	1	23.3333	0
462	0	1	23	1	0	0	0	0	0	0	0	0	0	0	0	0	0	0	0	0	0	0	0	1	35.6682	0
463	0	1	63	0	0	0	0	0	0	0	0	1	0	1	0	0	0	0	0	0	0	0	0	1	109.674	1
464	0	1	32	0	0	0	0	0	0	0	0	0	0	0	0	0	0	0	0	0	0	0	0	1	24.4444	0
465	0	0	40	0	0	1	0	0	0	0	0	0	0	0	0	0	0	0	0	0	0	0	0	1	33.3333	0
466	1	1	65	0	0	1	0	0	0	0	0	0	0	0	0	0	0	0	0	0	0	0	0	1	82.7773	1
467	0	1	26	0	0	0	0	0	0	0	0	0	0	0	0	0	0	0	0	0	0	0	0	1	17.7778	0
468	0	1	27	0	0	0	1	0	0	0	0	0	0	0	0	0	0	0	0	0	0	0	0	1	33.0418	0
469	1	1	23	0	0	0	0	0	0	0	0	0	0	0	0	0	0	0	0	0	0	0	0	1	36.1107	0
470	1	0	65	0	1	0	0	0	0	0	0	1	0	0	0	0	0	0	0	0	0	1	1	1	113.886	1
471	1	0	47	0	0	0	0	0	0	0	0	0	0	1	0	0	0	0	0	0	0	1	0	1	82.4536	1
472	0	1	48	0	0	0	0	0	0	0	1	0	0	0	0	0	0	0	0	0	0	0	0	1	42.2222	0
473	1	0	53	0	0	1	0	0	0	0	0	0	1	0	0	0	0	0	0	0	0	1	0	1	69.444	0
474	0	0	21	0	0	0	0	0	0	0	0	1	0	0	0	0	0	0	0	0	0	0	0	1	43.3313	0
475	0	1	21	0	0	1	0	0	0	0	0	0	0	0	0	0	0	0	0	0	0	1	0	1	12.2222	0
476	0	1	34	0	0	0	1	0	0	0	0	0	0	0	0	0	0	0	0	0	0	0	0	1	40.8196	0
477	0	1	58	0	0	1	0	0	0	0	0	0	0	0	0	0	0	0	0	0	0	0	0	1	53.3333	0
478	1	1	31	0	0	1	0	0	0	0	0	0	1	0	0	0	0	0	0	0	0	0	0	1	44.9995	0
479	0	1	21	1	1	0	1	0	0	0	1	0	0	0	0	0	0	0	0	0	0	0	0	1	47.5989	0
480	1	0	77	0	0	0	0	0	0	0	0	0	0	1	0	0	0	0	0	0	0	1	0	1	115.787	1
481	0	1	30	0	1	0	0	0	0	0	0	0	0	0	0	0	0	0	0	0	0	0	0	1	22.2222	0
482	1	1	47	0	0	0	0	0	0	0	0	0	0	0	0	0	0	0	0	0	0	1	0	1	62.7773	0
483	1	1	49	0	0	0	0	0	0	1	0	0	0	0	0	0	0	0	0	0	0	1	0	1	126.185	1
484	0	1	22	1	0	0	0	0	0	0	0	0	0	0	0	0	0	0	0	0	0	0	0	1	34.5571	0
485	1	1	70	0	0	1	0	0	0	0	0	0	0	0	0	0	0	0	0	0	0	0	0	1	88.3329	1
486	0	1	29	0	0	0	0	0	0	0	0	0	0	0	0	0	0	0	0	0	0	0	0	1	21.1111	0
487	1	1	48	0	0	0	0	0	0	0	0	0	0	0	0	0	0	0	0	0	0	1	1	1	63.8884	0
488	0	1	49	0	0	1	0	0	0	0	0	0	0	0	0	0	0	0	0	0	0	0	0	1	43.3333	0
489	0	1	29	0	0	0	0	0	0	0	0	0	0	0	0	0	0	0	0	0	0	0	0	1	21.1111	0
490	1	0	46	0	0	0	0	0	0	0	0	0	0	1	0	0	0	0	0	0	0	0	0	1	81.3424	1
491	0	1	33	0	0	0	0	0	0	0	0	0	0	0	0	0	0	0	0	0	0	0	0	1	25.5556	0
492	0	1	21	0	1	0	0	0	0	0	0	0	0	0	0	0	0	0	0	0	0	0	0	1	12.2222	0
493	0	1	31	1	0	0	1	0	0	0	0	0	0	0	0	0	0	0	0	0	0	0	0	1	58.71	0
494	0	1	27	0	0	0	0	0	0	0	0	0	0	1	0	0	0	0	0	0	0	0	0	1	38.5651	0
495	0	1	43	0	0	0	0	0	0	0	0	0	0	0	0	0	0	0	0	1	0	0	0	1	36.6667	0
496	0	1	52	0	0	1	0	0	0	0	0	1	0	0	1	0	0	0	0	0	0	0	0	1	77.7757	1
497	1	0	52	0	0	0	0	0	0	0	0	1	0	0	0	0	0	0	0	0	0	0	0	1	99.4419	1
498	1	1	78	1	0	0	0	0	0	0	0	0	0	1	0	0	0	0	0	0	0	1	0	1	138.122	1
499	0	1	23	1	0	0	0	0	0	0	1	0	0	0	0	0	0	0	0	0	0	1	0	1	35.6682	0
500	0	1	30	1	1	0	1	0	0	0	0	0	0	0	0	0	0	0	0	0	0	0	0	1	57.5989	0
501	0	1	42	0	0	0	0	0	0	0	0	0	0	0	0	0	0	0	0	0	0	0	0	1	35.5556	0
502	1	0	92	0	0	0	0	0	0	0	0	0	0	1	0	0	0	0	0	0	0	1	0	1	132.454	1
503	1	1	58	0	0	0	1	0	0	0	0	0	0	0	0	0	0	0	0	0	0	0	0	1	89.1524	1
504	0	1	41	0	0	0	0	0	0	0	0	0	0	0	0	0	0	0	0	0	0	1	0	1	34.4444	0
505	0	1	26	0	0	0	0	0	0	0	0	0	0	0	0	0	0	0	0	0	0	0	0	1	17.7778	0
506	0	1	33	1	1	0	1	0	0	0	0	1	0	0	0	0	0	0	0	0	0	0	0	1	92.0413	1
507	0	1	22	1	0	0	0	0	0	0	1	0	0	0	0	0	0	0	0	0	0	0	0	1	34.5571	0
508	0	1	30	0	0	0	0	0	0	0	0	0	0	0	0	0	0	0	0	0	0	0	0	1	22.2222	0
509	0	1	48	0	0	0	0	0	0	0	0	0	0	0	0	0	0	0	0	0	0	0	0	1	42.2222	0
510	0	1	28	0	0	0	0	0	0	0	0	0	0	0	0	0	0	0	0	0	0	0	0	1	20	0
511	0	1	33	1	1	0	1	0	0	0	0	0	0	0	0	0	0	0	0	0	0	1	0	1	60.9322	0
512	0	1	19	1	1	0	1	0	0	0	0	1	0	0	0	0	0	0	0	0	0	0	0	1	76.4857	1
513	0	1	45	0	0	0	0	0	0	0	0	0	0	0	0	0	0	0	0	0	0	1	0	1	38.8889	0
514	0	0	52	0	0	0	0	0	0	0	0	0	0	1	0	0	0	0	0	0	0	1	0	1	66.3429	0
515	1	1	61	0	0	0	0	0	0	0	0	0	0	0	0	0	0	0	0	0	0	0	0	1	78.3329	1
516	0	1	22	0	0	0	0	0	0	0	0	0	0	0	0	0	0	0	0	0	0	0	0	1	13.3333	0
517	0	1	48	1	1	0	0	0	0	0	0	0	0	0	0	0	0	0	0	0	0	0	0	1	63.446	0
518	1	1	76	0	0	0	0	0	0	0	0	0	0	1	0	0	0	0	0	0	0	1	1	1	114.676	1
519	0	0	51	0	0	0	0	0	0	0	0	0	0	0	1	0	0	0	0	0	0	1	0	1	45.5555	0
520	0	1	23	0	0	0	0	0	0	0	0	0	0	0	0	0	0	0	0	0	0	0	0	1	14.4444	0
521	0	1	22	0	1	0	0	0	0	0	0	0	0	0	0	0	0	0	0	0	0	0	0	1	13.3333	0
522	1	0	77	0	0	1	0	0	0	0	0	0	1	0	0	0	0	0	0	0	0	1	1	1	96.1107	1
523	0	0	49	0	0	0	0	0	0	0	0	0	0	0	0	0	0	0	0	0	0	0	0	1	43.3333	0
524	1	1	23	0	0	0	1	0	0	0	1	0	0	1	1	0	0	0	0	0	0	1	0	1	69.9398	0
525	1	0	69	0	0	0	0	0	0	0	0	0	0	0	0	0	0	0	0	0	0	0	0	1	87.2218	1
526	0	1	43	0	0	0	0	0	0	0	0	0	0	0	0	0	0	0	0	0	0	0	0	1	36.6667	0
527	0	0	46	0	0	0	0	0	0	0	0	0	0	0	0	0	0	0	0	0	0	0	0	1	40	0
528	1	1	61	0	0	0	0	0	0	0	0	1	0	1	0	0	0	0	0	0	0	1	0	1	129.118	1
529	1	1	42	0	0	0	0	0	0	0	0	0	1	0	0	0	0	0	0	0	0	1	1	1	57.2218	0
530	1	0	53	0	0	1	0	0	0	0	0	0	0	0	0	0	0	0	0	0	0	0	0	1	69.444	0
531	0	1	42	0	0	0	0	0	0	0	0	0	0	0	0	0	0	0	0	0	0	0	0	1	35.5556	0
532	1	0	59	0	0	0	0	0	0	0	0	0	0	1	0	0	0	0	0	0	0	1	1	1	95.7869	1
533	0	1	23	0	0	0	1	0	0	0	0	0	0	0	0	0	0	0	0	0	0	0	0	1	28.5973	0
534	0	1	18	0	0	0	0	0	0	0	0	0	0	0	0	0	0	0	0	0	0	0	0	1	8.88889	0
535	0	1	28	0	0	0	0	0	0	0	0	0	0	0	0	0	0	0	0	0	0	1	0	1	20	0
536	0	1	22	0	0	0	0	0	0	0	1	0	0	0	0	0	0	0	0	0	0	0	0	1	13.3333	0
537	0	1	21	0	1	0	0	0	0	0	0	0	0	0	0	0	0	0	0	0	0	0	0	1	12.2222	0
538	0	1	32	0	0	0	0	0	0	0	0	0	0	0	0	0	0	0	0	0	0	0	0	1	24.4444	0
539	1	0	61	0	0	0	0	0	0	0	0	0	0	0	0	0	0	0	0	0	0	0	0	1	78.3329	1
540	0	1	55	0	0	0	0	0	0	0	0	0	0	0	1	0	0	0	0	0	0	1	0	1	50	0
541	0	1	23	1	0	0	0	0	0	0	0	0	1	0	0	0	0	0	0	0	0	0	0	1	35.6682	0
542	0	1	28	0	0	0	0	0	0	0	0	0	1	0	0	0	0	0	0	0	0	0	0	1	20	0
543	0	1	34	0	0	0	0	0	0	0	0	0	0	1	0	0	0	0	0	0	0	0	0	1	46.3429	0
544	0	1	53	1	1	0	1	0	1	0	0	0	0	0	0	0	0	0	0	0	0	1	0	1	83.1544	1
545	1	0	78	0	0	0	0	0	0	1	0	0	0	1	0	0	0	0	0	0	0	1	1	1	178.084	1
546	1	0	55	0	0	0	0	0	0	0	0	1	0	0	0	0	0	0	1	0	0	1	1	1	139.716	1
547	1	0	76	1	0	0	0	0	0	0	0	0	0	0	0	0	0	0	0	0	0	1	1	1	116.223	1
548	0	1	34	0	0	0	0	0	0	0	0	0	0	0	0	0	0	0	0	0	0	0	0	1	26.6667	0
549	1	1	26	0	0	0	0	0	0	0	0	0	0	1	0	0	0	0	0	0	0	0	0	1	59.1202	0
550	0	1	23	0	0	0	0	0	0	0	0	0	0	0	0	0	0	0	0	0	0	0	0	1	14.4444	0
551	1	1	42	0	0	0	1	0	0	0	0	0	0	0	0	0	0	0	0	0	0	1	1	1	71.3747	0
552	0	1	59	0	0	0	0	0	0	0	0	0	0	0	0	0	0	0	0	0	0	1	0	1	54.4444	0
553	0	1	33	0	0	0	0	0	0	0	0	0	1	1	0	0	0	0	0	0	0	1	0	1	45.2318	0
554	0	1	45	0	0	0	0	0	0	0	0	0	0	0	0	0	0	0	0	0	0	0	0	1	38.8889	0
555	0	1	24	0	0	0	0	0	0	0	0	0	0	0	0	0	0	0	0	0	0	0	0	1	15.5556	0
556	1	0	34	0	0	1	0	0	0	0	0	0	0	1	0	0	0	0	0	0	0	1	0	1	68.0091	0
557	1	1	75	0	0	0	0	0	0	0	0	0	0	0	0	0	0	0	0	0	1	0	0	1	93.8884	1
558	1	1	25	0	0	1	0	0	0	0	0	0	1	0	0	0	0	0	0	0	0	0	0	1	38.3329	0
559	0	1	30	0	1	0	0	0	0	0	0	0	0	0	0	0	0	0	0	0	0	0	0	1	22.2222	0
560	0	1	73	0	0	0	0	0	0	0	0	0	0	0	0	0	0	0	0	0	0	1	0	1	70	0
561	1	0	73	0	0	0	0	0	0	0	0	0	0	0	0	0	0	1	0	0	0	1	0	1	91.6662	1
562	0	1	33	0	0	0	0	0	0	0	0	0	0	0	0	0	0	0	0	0	0	0	0	1	25.5556	0
563	1	0	72	1	0	0	0	0	0	0	1	0	0	0	0	0	0	0	0	0	0	1	0	1	111.779	1
564	0	1	48	0	0	0	1	0	0	0	0	0	0	0	0	0	0	0	0	0	0	0	0	1	56.3751	0
565	1	1	54	1	0	0	0	0	0	0	0	0	0	0	0	0	0	0	0	0	1	0	0	1	91.7789	1
566	1	0	51	0	0	0	0	0	0	0	0	0	0	0	0	0	0	0	1	0	0	1	1	1	104.162	1
567	0	1	52	1	1	0	1	0	0	0	0	0	0	0	0	0	0	0	0	0	0	1	0	1	82.0433	1
568	0	0	50	0	0	1	0	0	0	0	0	0	1	0	0	0	0	0	0	0	0	0	0	1	44.4444	0
569	1	0	31	0	0	0	0	0	0	0	0	0	0	0	0	0	0	0	0	0	0	0	0	1	44.9995	0
570	1	0	46	1	1	0	1	0	0	0	0	0	0	1	0	0	0	0	0	0	0	1	1	1	116.719	1
571	0	1	26	1	1	0	1	0	0	0	0	0	0	0	0	0	0	0	0	0	0	1	0	1	53.1545	0
572	1	0	66	0	0	1	0	0	0	0	0	0	0	0	0	0	0	0	0	0	0	1	0	1	83.8884	1
573	0	1	31	1	1	0	0	0	0	0	0	0	0	0	0	0	0	0	0	0	0	0	0	1	44.5571	0
574	0	1	31	0	0	0	0	0	0	0	0	0	0	0	0	0	0	0	0	0	0	0	0	1	23.3333	0
575	0	1	43	0	0	0	0	0	0	0	0	0	0	1	0	0	0	0	0	0	0	0	0	1	56.3429	0
576	0	1	36	0	0	0	0	0	0	0	0	0	0	0	0	0	0	0	0	0	0	0	0	1	28.8889	0
577	0	0	35	0	0	0	0	0	0	0	0	0	0	1	0	0	0	0	0	0	0	0	0	1	47.454	0
578	0	0	25	0	0	1	0	0	0	0	0	0	1	0	0	0	0	0	0	0	0	0	0	1	16.6667	0
579	1	0	49	0	0	1	0	0	0	0	0	0	0	0	0	0	0	0	0	0	0	1	0	1	64.9995	0
580	1	1	35	0	0	0	0	0	1	0	0	0	0	0	0	0	0	0	0	0	0	1	0	1	49.444	0
581	0	1	35	0	0	0	0	0	0	0	0	0	0	0	0	0	0	0	0	0	0	0	0	1	27.7778	0
582	1	1	74	0	0	0	0	0	0	0	0	0	0	0	0	0	0	0	1	0	0	1	1	1	129.718	1
583	0	1	25	0	0	0	0	0	0	0	0	0	1	0	0	0	0	0	0	0	0	0	0	1	16.6667	0
584	1	0	80	0	0	0	0	0	0	0	1	0	0	0	0	1	0	0	0	0	0	1	0	1	99.444	1
585	0	1	22	0	0	0	0	0	1	0	0	0	0	0	0	0	0	0	0	0	0	0	0	1	13.3333	0
586	1	1	56	0	0	0	0	0	0	0	1	0	0	0	1	0	0	0	0	0	0	1	0	1	72.7773	0
587	1	1	35	0	0	0	0	0	0	0	0	0	0	0	0	0	0	0	0	0	0	0	0	1	49.444	0
588	0	1	41	1	1	0	0	0	0	0	0	0	0	0	0	0	0	0	0	0	0	0	0	1	55.6682	0
589	0	1	47	1	0	0	0	0	0	0	1	0	0	0	0	0	0	0	0	0	0	0	0	1	62.3349	0
590	0	1	34	0	0	0	0	0	0	0	0	0	0	0	0	0	0	0	0	0	0	0	0	1	26.6667	0
591	0	1	29	0	1	0	0	0	0	0	0	0	0	0	0	0	0	0	0	0	0	0	0	1	21.1111	0
592	1	0	64	0	0	1	0	0	0	0	0	0	0	0	0	0	0	0	0	0	0	0	0	1	81.6662	1
593	1	1	77	0	0	0	0	0	0	0	0	0	0	0	0	0	0	0	1	0	0	1	1	1	133.051	1
594	0	1	29	0	0	0	0	0	0	0	0	0	0	0	0	0	0	0	0	0	0	0	0	1	21.1111	0
595	1	0	60	0	0	0	0	0	0	0	0	0	0	0	0	0	0	0	0	0	0	1	0	1	77.2218	1
596	0	0	30	1	0	0	1	0	0	0	0	0	0	0	0	0	0	0	0	0	0	0	0	1	57.5989	0
597	0	0	29	0	0	0	0	0	0	0	1	0	0	0	0	0	0	0	0	0	0	1	0	1	21.1111	0
598	0	1	42	0	0	0	0	0	0	0	0	0	0	0	0	0	0	0	0	0	0	1	0	1	35.5556	0
599	1	0	68	0	0	0	0	0	0	0	0	0	0	0	0	0	0	0	0	0	0	1	0	1	86.1107	1
600	0	1	33	0	0	0	0	0	0	0	0	0	0	0	0	0	0	0	0	0	0	1	0	1	25.5556	0
601	1	0	36	0	0	1	0	0	0	0	0	0	1	0	1	0	0	0	0	0	0	0	0	1	50.5551	0
602	0	1	51	1	1	0	1	0	0	0	0	0	0	0	0	0	0	0	0	0	0	0	0	1	80.9322	1
603	0	1	37	0	0	1	0	0	0	0	0	0	0	0	0	0	0	0	0	0	0	0	0	1	30	0
604	0	1	38	0	0	0	0	0	0	0	0	0	0	0	0	0	0	0	0	0	0	0	0	1	31.1111	0
605	1	1	22	1	0	0	1	0	0	0	0	0	1	0	1	0	0	0	0	0	0	0	0	1	70.3762	0
606	0	1	59	0	0	0	0	0	0	0	0	0	0	0	1	0	0	0	0	0	0	0	0	1	54.4444	0
607	0	1	36	0	0	0	0	0	0	0	0	0	0	0	0	0	0	1	0	0	0	0	0	1	28.8889	0
608	0	1	31	0	1	0	0	0	0	0	0	0	0	0	0	0	0	0	0	0	0	0	0	1	23.3333	0
609	1	0	48	0	0	0	0	0	0	0	0	0	0	0	0	0	0	0	0	0	0	0	0	1	63.8884	0
610	1	0	35	0	0	1	0	0	0	0	0	0	0	0	0	0	0	0	0	0	0	0	0	1	49.444	0
611	1	0	72	0	0	0	0	0	0	0	0	0	0	0	0	0	0	0	0	0	0	1	0	1	90.5551	1
612	0	1	21	0	0	0	0	0	0	0	1	0	0	0	0	0	0	0	0	0	0	1	0	1	12.2222	0
613	0	1	65	0	0	1	0	0	0	0	0	0	0	0	0	0	0	0	0	0	0	0	0	1	61.1111	0
614	1	0	49	0	0	0	0	0	0	0	0	0	1	0	0	0	0	0	0	0	0	1	0	1	64.9995	0
615	0	0	31	0	0	0	0	0	0	0	0	0	1	0	0	0	0	0	0	0	0	0	0	1	23.3333	0
616	0	1	25	0	1	0	0	0	0	0	0	0	0	1	0	0	0	0	0	0	0	0	0	1	36.3429	0
617	0	1	49	1	0	0	0	0	0	0	0	0	0	0	0	0	0	0	0	0	0	0	0	1	64.5571	0
618	1	1	21	0	0	0	0	0	0	0	0	0	0	0	0	0	0	0	0	0	0	1	0	1	33.8884	0
619	0	1	53	0	0	0	0	0	0	0	0	0	0	0	0	0	0	0	0	0	0	1	0	1	47.7778	0
620	0	1	31	0	0	0	1	0	0	0	0	0	0	0	0	0	0	0	0	0	0	1	1	1	37.4862	0
621	0	1	46	0	0	0	1	0	0	0	0	0	1	0	0	0	0	0	0	0	0	0	0	1	54.1529	0
622	0	1	53	1	1	0	0	0	0	0	0	0	0	0	0	0	0	0	0	0	0	1	0	1	69.0016	0
623	0	1	40	0	0	0	0	0	0	0	0	0	0	1	0	0	0	0	0	0	0	1	0	1	53.0096	0
624	0	1	38	0	0	0	0	0	0	0	0	0	0	0	0	0	0	0	0	0	0	0	0	1	31.1111	0
625	0	1	26	1	1	0	1	0	0	0	0	0	0	0	0	0	0	0	0	0	0	1	0	1	53.1545	0
626	0	0	32	0	0	0	0	0	0	0	0	0	0	0	0	0	0	0	0	0	0	0	0	1	24.4444	0
627	1	0	66	0	0	0	0	0	0	0	0	0	0	1	0	0	0	0	0	0	0	1	0	1	103.565	1
628	1	1	68	0	0	0	0	0	0	0	1	0	0	1	0	1	0	0	0	0	0	1	1	1	105.787	1
629	1	0	73	0	1	0	0	0	0	0	0	1	0	0	0	0	0	0	0	0	0	0	0	1	122.775	1
630	0	1	24	0	0	0	0	0	0	0	0	0	0	0	0	0	0	0	0	0	0	0	0	1	15.5556	0
631	0	1	26	1	1	0	1	0	0	0	0	0	0	0	0	0	0	0	0	0	0	0	0	1	53.1545	0
632	1	1	76	0	0	1	0	0	0	0	1	0	0	0	0	0	0	0	0	0	0	1	1	1	94.9995	1
633	1	1	65	0	0	1	0	0	0	0	0	0	0	0	0	0	0	0	0	0	0	1	0	1	82.7773	1
634	0	1	24	0	0	0	0	0	0	0	0	0	0	1	0	0	0	0	0	0	0	0	0	1	35.2318	0
635	0	1	34	0	0	0	0	0	0	0	0	0	0	0	0	0	0	0	0	0	0	0	0	1	26.6667	0
636	1	0	21	1	0	1	0	0	0	0	0	0	0	0	0	0	0	0	0	0	0	0	0	1	55.1122	0
637	0	1	19	0	0	0	0	0	0	0	0	0	0	0	0	0	0	0	0	0	0	0	0	1	10	0
638	0	1	36	0	0	1	0	0	0	0	0	0	0	0	1	0	0	0	0	0	0	0	0	1	28.8889	0
639	0	1	59	0	0	0	0	0	0	0	0	0	0	0	0	0	0	0	0	0	0	0	0	1	54.4444	0
640	0	1	24	0	0	0	0	0	0	0	0	0	0	0	0	0	0	0	0	0	0	0	0	1	15.5556	0
641	0	1	31	0	0	0	0	0	0	0	0	0	0	1	0	0	0	0	0	0	0	1	0	1	43.0096	0
642	1	0	54	0	0	0	0	0	0	0	0	0	0	1	0	0	0	0	0	0	0	1	0	1	90.2313	1
643	0	1	49	0	0	0	0	0	0	0	0	0	1	0	0	0	0	0	0	0	0	0	0	1	43.3333	0
644	1	0	89	0	0	0	0	0	0	0	0	0	0	1	0	0	0	0	0	0	0	1	0	1	129.12	1
645	0	1	31	0	0	0	0	0	0	0	1	0	0	0	0	0	0	0	0	0	0	0	0	1	23.3333	0
646	0	1	40	1	1	0	1	0	0	0	0	0	0	0	0	0	0	0	0	0	0	0	0	1	68.71	0
647	0	1	27	1	1	0	1	0	0	0	0	0	0	0	0	0	0	0	0	0	0	0	0	1	54.2656	0
648	0	0	52	0	0	0	0	0	0	0	0	0	0	0	0	0	0	0	0	0	1	1	0	1	46.6667	0
649	0	1	36	0	0	0	0	0	0	0	0	0	0	0	0	0	0	0	0	0	0	1	0	1	28.8889	0
650	0	1	20	1	1	0	1	0	1	0	0	0	0	0	0	0	0	0	0	0	0	0	0	1	46.4878	0
651	0	1	49	0	0	0	0	0	0	0	0	0	0	0	0	0	0	0	0	0	0	0	0	1	43.3333	0
652	1	0	60	1	0	1	0	0	0	0	0	0	0	0	0	0	0	0	0	0	0	1	0	1	98.4455	1
653	0	1	20	1	0	0	0	0	0	0	0	0	0	1	0	0	0	0	0	0	0	0	0	1	52.0111	0
654	0	1	39	0	0	0	0	0	0	0	0	0	0	0	0	0	0	0	0	0	0	0	0	1	32.2222	0
655	1	0	53	0	0	1	0	0	0	0	1	0	0	0	0	0	0	0	0	0	0	1	0	1	69.444	0
656	1	0	66	0	0	1	0	0	0	0	0	0	0	0	0	0	0	0	0	0	0	1	0	1	83.8884	1
657	1	1	60	1	1	0	1	0	0	1	0	0	0	0	1	0	0	0	0	0	0	1	1	1	173.784	1
658	0	1	22	0	0	0	0	0	0	0	0	0	0	1	0	0	0	0	0	0	0	1	0	1	33.0096	0
659	1	1	66	0	0	0	0	0	0	0	0	0	0	0	0	0	0	0	0	0	0	1	0	1	83.8884	1
660	0	1	24	0	0	0	0	0	0	0	0	0	1	0	0	0	0	0	0	0	0	1	0	1	15.5556	0
661	0	1	34	0	0	0	0	0	0	0	0	0	0	0	0	0	0	0	0	0	0	0	0	1	26.6667	0
662	0	1	36	0	0	0	0	0	0	0	0	0	0	0	0	0	0	0	0	0	0	1	1	1	28.8889	0
663	1	0	29	0	0	1	0	0	0	0	0	0	0	1	0	0	0	0	0	0	0	0	0	1	62.4536	0
664	0	1	31	0	0	0	0	0	0	0	0	0	0	0	0	0	0	0	0	0	0	0	0	1	23.3333	0
665	0	1	22	1	0	0	0	0	0	0	0	0	1	0	0	0	0	0	0	0	0	0	0	1	34.5571	0
666	1	0	74	0	0	1	0	0	0	0	0	0	0	0	0	1	0	0	0	0	0	1	0	1	92.7773	1
667	0	1	19	0	0	0	0	0	0	0	1	0	0	0	0	0	0	0	0	0	0	0	0	1	10	0
668	0	1	30	0	0	0	0	0	0	0	0	0	0	0	0	0	0	0	0	0	0	0	0	1	22.2222	0
669	1	0	36	0	0	0	0	0	0	0	0	0	0	0	0	0	0	0	0	0	0	1	0	1	50.5551	0
670	1	1	52	0	0	0	0	0	0	0	0	0	0	1	0	0	0	0	0	0	0	1	0	1	88.0091	1
671	0	1	28	0	0	0	0	0	0	0	1	0	0	0	0	0	0	0	0	0	0	0	0	1	20	0
672	0	0	39	0	0	0	0	0	0	0	0	0	0	0	0	0	0	0	0	0	0	0	0	1	32.2222	0
673	1	0	68	0	0	0	0	0	0	0	0	0	0	0	0	0	0	1	0	0	0	1	0	1	86.1107	1
674	1	0	34	0	0	0	0	0	0	0	0	0	0	0	0	0	0	0	0	0	0	1	0	1	48.3329	0
675	1	0	51	0	0	0	0	0	0	0	0	0	0	0	0	0	0	0	0	0	0	0	0	1	67.2218	0
676	1	1	82	0	0	0	0	0	0	0	1	0	0	0	0	0	0	0	0	0	0	1	0	1	101.666	1
677	0	1	30	0	0	0	0	0	0	0	0	0	0	0	0	0	0	0	0	0	0	1	0	1	22.2222	0
678	0	1	28	0	0	0	0	0	0	0	0	0	0	0	0	0	0	0	0	0	0	0	0	1	20	0
679	1	0	57	0	0	0	0	0	0	0	0	0	0	1	0	0	0	0	0	0	0	0	0	1	93.5647	1
680	0	1	53	0	0	0	0	0	0	0	0	0	0	0	1	0	0	0	0	0	0	0	0	1	47.7778	0
681	1	1	79	0	0	0	0	0	0	0	0	0	0	1	0	0	0	0	0	0	1	0	0	1	118.009	1
682	1	0	63	0	0	1	0	0	0	0	0	0	0	0	0	0	0	0	0	0	0	1	0	1	80.5551	1
683	0	1	23	1	1	0	1	0	0	0	0	0	0	0	0	0	0	0	0	0	0	0	0	1	49.8211	0
684	0	1	33	0	0	0	0	0	1	0	0	0	0	0	0	0	0	0	0	0	0	1	0	1	25.5556	0
685	0	1	25	0	0	0	0	0	0	0	0	0	0	0	0	0	0	0	0	0	0	1	0	1	16.6667	0
686	1	0	68	0	0	0	0	0	0	0	0	0	0	0	0	0	0	0	0	0	0	0	0	1	86.1107	1
687	1	0	68	0	0	0	0	0	0	0	0	0	0	0	0	0	0	0	0	0	0	1	0	1	86.1107	1
688	1	1	74	0	0	0	0	0	0	1	0	0	0	0	0	0	0	0	0	0	0	0	0	1	153.963	1
689	1	0	56	0	0	1	0	0	0	0	0	0	0	0	0	0	0	0	0	0	0	0	0	1	72.7773	0
690	1	0	36	0	0	0	0	0	0	0	0	0	0	1	0	0	0	0	0	0	0	0	0	1	70.2313	0
691	1	1	68	0	0	0	0	0	0	0	0	0	1	0	0	0	0	0	0	0	0	1	0	1	86.1107	1
692	0	1	39	1	0	0	0	0	0	0	0	0	0	0	0	0	0	0	0	0	0	1	0	1	53.446	0
693	0	1	21	0	0	1	0	0	0	0	0	0	1	0	0	0	0	0	0	0	0	0	0	1	12.2222	0
694	0	1	45	0	0	0	0	0	0	0	0	0	0	0	0	0	0	0	0	0	0	0	0	1	38.8889	0
695	0	0	35	1	1	0	0	0	0	0	0	0	0	0	0	0	0	0	0	0	0	1	0	1	49.0016	0
696	0	1	41	0	0	0	0	0	0	0	0	0	0	0	0	0	0	0	0	0	0	0	0	1	34.4444	0
697	0	1	29	0	0	0	0	0	0	0	0	0	0	0	0	0	0	0	0	0	0	0	0	1	21.1111	0
698	1	1	61	0	0	1	0	0	0	0	0	0	1	0	0	0	0	0	0	0	0	1	0	1	78.3329	1
699	0	1	29	1	1	0	0	0	0	0	0	0	0	0	0	0	0	0	0	0	0	1	0	1	42.3349	0
700	1	1	28	0	0	0	0	0	0	0	0	0	0	1	0	0	0	0	0	0	0	1	0	1	61.3424	0
701	1	1	44	0	0	0	0	0	0	0	0	0	0	0	0	0	0	0	0	0	0	0	0	1	59.444	0
702	0	1	25	1	1	0	1	0	0	0	0	0	0	0	0	0	0	0	0	0	0	0	0	1	52.0433	0
703	1	0	65	0	0	1	0	0	0	0	0	0	0	0	0	0	0	0	0	0	0	0	0	1	82.7773	1
704	0	1	40	0	0	0	0	0	0	0	0	0	0	0	0	0	0	0	0	0	0	1	0	1	33.3333	0
705	0	1	30	1	1	0	1	0	0	0	0	0	0	0	0	0	0	0	0	0	0	0	0	1	57.5989	0
706	1	1	43	0	0	0	0	0	0	0	0	0	0	0	0	0	0	0	0	0	0	1	0	1	58.3329	0
707	0	1	19	0	0	1	0	0	0	0	1	0	0	0	0	0	0	0	0	0	0	0	0	1	10	0
708	1	1	34	0	0	0	0	0	0	0	0	1	0	0	0	0	0	0	0	0	0	1	0	1	79.4419	1
709	0	1	39	0	1	0	0	0	0	0	0	0	0	0	0	0	0	0	0	0	0	0	0	1	32.2222	0
710	1	0	43	0	0	0	0	0	0	0	0	0	1	0	0	0	0	0	0	0	0	0	0	1	58.3329	0
711	1	0	74	0	0	0	0	0	0	0	0	0	0	0	0	0	0	0	0	0	0	1	0	1	92.7773	1
712	1	0	66	0	0	0	0	0	0	0	0	0	0	0	0	0	0	0	1	0	0	0	0	1	120.829	1
713	0	1	25	0	0	0	0	0	0	0	0	0	0	0	0	0	0	0	0	0	0	0	0	1	16.6667	0
714	0	1	34	0	0	0	0	0	0	0	0	1	0	1	0	0	0	0	0	0	0	0	0	1	77.4519	1
715	0	1	30	0	0	0	0	0	0	0	0	0	0	0	0	0	0	0	0	0	0	1	0	1	22.2222	0
716	0	1	41	0	0	0	0	0	0	0	0	0	0	0	0	0	0	0	0	0	0	0	0	1	34.4444	0
717	0	1	21	0	0	0	0	0	0	0	0	0	1	0	0	0	0	0	0	0	0	0	0	1	12.2222	0
718	0	1	36	1	1	0	0	0	0	0	0	0	0	0	0	0	0	0	0	0	0	0	0	1	50.1127	0
719	1	0	43	0	0	0	0	0	0	0	0	0	0	0	0	0	0	0	0	0	0	0	0	1	58.3329	0
720	0	1	21	0	0	0	0	0	0	0	0	0	0	0	0	0	0	0	0	0	0	0	0	1	12.2222	0
721	0	1	29	0	0	0	0	0	0	0	0	0	0	0	0	0	0	0	0	0	0	1	0	1	21.1111	0
722	1	0	54	0	0	1	0	0	0	0	0	0	0	0	0	0	0	0	0	0	0	1	0	1	70.5551	0
723	0	1	44	0	0	0	0	0	0	0	0	1	0	0	0	0	0	0	0	0	0	0	0	1	68.8868	0
724	1	0	77	0	0	1	0	0	0	0	0	0	1	0	0	0	0	0	0	0	0	1	0	1	96.1107	1
725	0	1	22	0	0	0	0	0	0	0	0	0	0	0	0	0	0	0	0	0	0	0	0	1	13.3333	0
726	0	1	31	0	0	0	0	0	0	0	0	0	0	0	0	0	0	0	0	0	0	0	0	1	23.3333	0
727	0	0	48	0	0	0	0	0	0	0	0	0	0	0	0	0	0	0	0	0	0	1	0	1	42.2222	0
728	1	1	65	1	0	0	0	0	0	0	0	0	1	0	0	0	0	0	0	0	0	0	0	1	104.001	1
729	1	0	26	0	0	0	0	0	0	0	0	0	0	0	0	0	0	0	0	0	0	0	0	1	39.444	0
730	1	0	49	0	0	0	0	0	0	0	0	0	0	0	0	0	0	0	0	0	0	0	0	1	64.9995	0
731	1	1	62	0	0	0	0	0	0	0	0	0	0	1	0	0	0	0	0	0	0	1	1	1	99.1202	1
732	0	1	45	0	0	1	0	0	0	0	0	0	0	0	0	0	0	0	0	0	0	0	0	1	38.8889	0
733	1	1	28	0	0	0	0	0	0	0	0	0	0	1	0	0	0	0	0	0	0	0	0	1	61.3424	0
734	1	1	68	0	0	0	0	0	0	0	0	0	0	0	0	0	0	0	0	0	0	1	1	1	86.1107	1
735	0	0	41	0	0	0	0	0	0	0	0	0	0	0	0	0	0	0	0	0	0	1	0	1	34.4444	0
736	0	1	36	0	0	0	0	0	0	0	0	0	0	0	0	0	0	0	0	0	0	1	0	1	28.8889	0
737	0	1	44	0	1	0	0	0	0	0	0	0	0	0	0	0	0	0	0	0	0	0	0	1	37.7778	0
738	1	1	48	0	0	0	0	0	0	0	0	0	0	0	0	0	0	0	0	0	0	0	0	1	63.8884	0
739	0	1	36	0	0	0	0	0	0	0	1	0	0	0	0	0	0	0	0	0	0	0	0	1	28.8889	0
740	0	1	31	1	1	0	0	0	0	0	0	0	0	0	0	0	0	0	0	0	0	0	0	1	44.5571	0
741	0	0	43	0	0	0	0	0	0	0	0	0	0	0	0	0	0	0	0	0	0	1	0	1	36.6667	0
742	1	0	44	0	0	1	0	0	0	0	0	0	0	0	0	0	0	0	0	0	0	1	0	1	59.444	0
743	1	0	54	0	0	0	0	0	0	0	0	0	0	1	0	0	0	0	0	0	0	0	0	1	90.2313	1
744	0	1	37	0	0	0	0	0	0	0	0	0	0	0	0	0	0	0	0	0	0	0	0	1	30	0
745	1	1	40	0	0	1	0	0	0	0	0	0	0	0	0	0	0	0	0	0	0	1	0	1	54.9995	0
746	0	1	23	0	0	0	0	0	0	0	0	0	0	0	1	0	0	0	0	0	0	0	0	1	14.4444	0
747	1	0	59	0	0	1	0	0	0	0	0	0	1	0	0	0	0	0	0	0	0	0	0	1	76.1107	1
748	0	1	26	0	0	0	0	0	1	0	0	0	0	0	0	0	0	0	0	0	0	0	0	1	17.7778	0
749	0	1	33	1	0	0	0	0	0	0	0	0	0	0	0	0	0	0	0	0	0	0	0	1	46.7793	0
750	1	1	72	0	0	0	0	0	0	1	0	0	0	1	0	0	0	1	0	0	0	1	1	1	171.417	1
751	0	0	31	1	0	0	0	0	0	0	0	0	0	1	0	0	0	0	0	0	0	0	0	1	64.2333	0
752	1	1	38	0	0	0	0	0	0	0	0	1	0	0	0	0	0	0	0	0	0	0	0	1	83.8864	1
753	1	0	68	1	1	0	1	0	0	1	0	0	0	1	0	0	0	1	0	0	0	1	1	1	202.35	1
754	0	0	25	0	0	0	0	0	0	0	0	0	0	0	0	0	0	0	0	0	0	0	0	1	16.6667	0
755	0	1	21	0	0	0	0	0	0	0	1	0	0	0	0	0	0	0	0	0	0	0	0	1	12.2222	0
756	1	1	40	0	0	0	0	0	0	0	0	0	0	0	0	0	0	0	0	0	0	0	0	1	54.9995	0
757	0	0	50	0	0	0	0	0	0	0	0	0	0	0	0	0	0	0	0	0	0	1	0	1	44.4444	0
758	0	1	41	0	0	1	0	0	0	0	0	0	1	0	0	0	0	0	0	0	0	0	0	1	34.4444	0
759	0	1	48	0	0	1	0	0	0	0	0	0	0	0	0	0	0	0	0	0	0	0	0	1	42.2222	0
760	1	0	34	0	0	0	0	0	0	0	0	0	0	0	0	0	0	0	0	0	0	0	0	1	48.3329	0
761	1	0	38	0	0	0	0	0	0	0	0	0	0	1	0	0	0	0	0	0	0	0	0	1	72.4536	0
762	0	1	23	0	0	0	0	0	0	0	0	0	0	0	0	0	0	0	0	0	0	0	0	1	14.4444	0
763	0	1	45	0	0	0	0	0	0	0	0	0	0	0	0	0	0	0	0	0	0	1	0	1	38.8889	0
764	0	1	31	0	0	0	0	0	0	0	0	0	1	0	0	0	0	0	0	0	0	0	0	1	23.3333	0
765	0	1	52	0	0	1	0	0	0	0	0	0	0	0	0	0	0	0	0	0	0	0	0	1	46.6667	0
766	0	1	48	1	0	1	0	0	0	0	0	0	0	0	0	0	0	0	0	0	0	0	0	1	63.446	0
767	0	1	22	0	0	0	0	0	0	0	0	0	0	0	0	0	0	0	1	0	0	0	0	1	50.2738	0
768	1	0	73	0	0	0	0	0	1	0	0	0	0	0	0	0	1	0	0	0	0	1	0	1	91.6662	1
769	0	1	30	0	0	1	0	0	0	0	0	0	0	0	0	0	0	0	0	0	0	0	0	1	22.2222	0
770	1	0	65	0	0	1	0	0	0	0	0	0	0	0	0	0	0	0	0	0	0	0	0	1	82.7773	1
771	1	1	16	0	0	0	0	0	0	0	0	0	1	0	0	0	0	0	0	0	0	1	0	1	28.3329	0
772	0	1	23	1	1	0	1	0	0	0	0	0	0	0	0	0	0	0	0	0	0	0	0	1	49.8211	0
773	1	1	37	0	0	0	0	0	0	0	0	0	0	0	0	0	0	0	1	0	0	0	0	1	88.6067	1
774	0	1	20	0	0	0	0	0	0	0	0	0	0	0	0	0	0	0	0	0	0	0	0	1	11.1111	0
775	1	0	60	0	0	0	0	0	0	0	0	0	0	1	0	0	0	0	0	0	0	1	0	1	96.898	1
776	1	0	70	1	0	0	0	0	0	0	0	0	1	1	0	0	0	0	0	0	0	1	1	1	129.233	1
777	0	1	32	0	0	0	0	0	0	0	0	0	0	0	0	0	0	0	0	0	0	0	0	1	24.4444	0
778	0	1	23	0	0	0	0	0	0	0	0	0	0	1	0	0	0	0	0	0	0	0	0	1	34.1207	0
779	0	1	34	0	0	0	0	0	0	0	0	0	0	0	0	0	0	0	0	0	0	0	0	1	26.6667	0
780	0	1	35	0	0	0	0	0	0	0	0	0	0	0	0	0	0	0	0	0	0	0	0	1	27.7778	0
781	0	1	71	0	0	0	0	0	0	0	0	0	0	0	0	0	0	0	1	0	0	1	0	1	104.718	1
782	1	1	24	0	0	0	0	0	0	0	0	0	1	0	0	0	0	0	0	0	0	1	0	1	37.2218	0
783	0	1	39	0	0	0	0	0	0	0	0	0	0	0	0	0	0	0	0	0	0	0	0	1	32.2222	0
784	0	0	25	0	0	0	0	0	0	0	0	0	0	0	0	0	0	0	0	0	0	1	0	1	16.6667	0
785	0	1	21	0	0	0	0	0	0	0	1	0	0	0	0	0	0	0	0	0	0	0	0	1	12.2222	0
786	0	1	31	0	0	0	0	0	0	0	1	0	0	0	0	0	0	0	0	0	0	0	0	1	23.3333	0
787	1	1	78	1	1	0	0	1	1	1	0	0	0	0	0	0	0	0	0	0	0	1	0	1	217.804	1
788	0	1	22	0	0	0	0	0	0	0	0	0	0	0	0	0	0	0	0	0	0	0	0	1	13.3333	0
789	1	1	57	0	0	0	0	0	0	0	0	1	0	0	0	0	0	0	0	0	0	1	1	1	104.997	1
790	0	1	29	1	0	0	0	0	0	0	1	0	0	1	0	0	0	0	0	0	0	1	0	1	62.0111	0
791	0	1	33	0	0	0	0	0	0	0	1	0	0	0	0	0	0	0	0	0	0	1	0	1	25.5556	0
792	0	1	29	0	0	0	0	0	0	0	0	0	0	0	0	0	0	0	0	0	0	0	0	1	21.1111	0
793	0	1	38	0	0	0	0	0	0	0	0	0	0	0	0	1	0	0	0	0	0	0	0	1	31.1111	0
794	1	0	15	0	0	0	0	0	0	0	0	0	1	0	0	0	0	0	0	0	0	0	0	1	27.2218	0
795	0	1	42	0	0	0	1	0	0	0	0	0	0	0	0	0	0	0	0	0	0	1	0	1	49.7084	0
796	0	1	24	1	1	0	1	0	0	0	0	0	0	0	0	0	0	0	0	0	0	0	0	1	50.9322	0
797	0	0	24	0	0	0	0	0	0	0	0	1	0	1	0	0	0	0	0	0	0	0	0	1	66.3408	0
798	0	1	39	0	1	0	0	0	0	0	0	0	0	0	0	0	0	0	0	0	0	0	0	1	32.2222	0
799	0	1	36	0	0	0	0	0	0	0	0	0	0	0	0	0	0	0	1	0	0	1	1	1	65.8294	0
800	1	1	51	1	1	0	1	0	0	0	0	0	0	0	1	0	0	0	0	0	0	0	0	1	102.598	1
801	0	0	53	0	0	1	0	0	0	0	0	0	0	0	0	0	0	0	0	0	0	1	0	1	47.7778	0
802	1	1	70	0	0	0	0	0	0	0	0	0	0	0	0	0	0	0	0	0	0	1	1	1	88.3329	1
803	0	1	27	0	0	0	0	0	0	0	0	0	0	0	0	0	0	0	0	0	0	0	0	1	18.8889	0
804	1	0	84	0	0	0	0	0	0	0	0	0	0	0	0	0	0	0	0	0	0	0	0	1	103.888	1
805	1	0	62	0	0	1	0	0	0	0	0	0	0	0	0	0	0	0	0	0	0	1	0	1	79.444	1
806	1	1	62	0	0	0	0	0	0	0	0	0	0	0	0	0	0	0	0	0	0	1	0	1	79.444	1
807	1	1	51	0	0	0	0	0	0	0	0	0	0	0	0	0	0	0	0	0	0	0	0	1	67.2218	0
808	1	1	74	0	0	0	0	0	0	0	0	0	0	0	0	0	0	0	0	0	0	1	0	1	92.7773	1
809	1	0	68	0	0	0	0	0	0	0	0	0	0	0	0	0	0	0	0	0	0	1	0	1	86.1107	1
810	0	1	44	0	0	0	0	0	0	0	0	0	0	0	0	0	0	0	1	0	0	0	0	1	74.7183	0
811	1	0	89	0	0	0	0	0	0	0	0	0	0	0	0	0	0	0	0	0	0	0	0	1	109.444	1
812	0	1	32	0	0	0	0	0	0	0	0	0	0	0	0	0	0	0	0	0	0	0	0	1	24.4444	0
813	1	1	32	1	0	0	0	0	0	0	0	0	1	0	0	0	0	0	0	0	0	0	0	1	67.3344	0
814	1	1	79	1	0	0	1	0	0	0	0	0	0	0	0	0	0	0	0	0	0	1	0	1	133.71	1
815	0	1	32	0	0	0	0	0	0	0	1	0	0	0	0	0	0	0	0	0	0	1	0	1	24.4444	0
816	1	0	55	0	0	0	0	0	0	0	0	0	0	0	0	0	0	0	0	0	0	0	0	1	71.6662	0
817	0	1	20	0	1	0	0	0	0	0	1	0	0	0	0	0	0	0	0	0	0	0	0	1	11.1111	0
818	1	1	19	1	0	0	0	0	0	0	0	0	0	0	0	0	0	0	1	0	0	0	0	1	89.8305	1
819	0	1	31	0	0	0	0	0	0	0	0	0	0	0	0	0	0	0	0	0	0	0	0	1	23.3333	0
820	0	1	21	0	0	0	0	0	0	0	1	0	0	0	0	0	0	0	0	0	0	1	0	1	12.2222	0
821	1	1	68	0	0	0	0	0	0	0	0	0	0	0	0	0	1	0	0	0	0	1	0	1	86.1107	1
822	0	1	23	0	0	0	0	0	0	0	1	0	0	0	0	0	0	0	0	0	0	0	0	1	14.4444	0
823	0	1	26	1	1	0	1	0	0	0	0	0	0	0	0	0	0	0	0	0	0	0	0	1	53.1545	0
824	1	0	39	0	0	0	0	0	0	0	0	0	0	0	0	0	0	0	0	0	0	1	0	1	53.8884	0
825	0	1	41	0	0	1	0	0	0	0	0	0	0	0	0	0	0	0	0	0	0	0	0	1	34.4444	0
826	0	1	22	1	1	0	1	0	0	0	1	0	0	0	0	0	0	0	0	0	0	0	0	1	48.71	0
827	0	1	47	0	0	0	0	0	0	0	0	0	0	0	0	0	0	0	0	0	0	1	0	1	41.1111	0
828	0	0	49	0	0	0	0	0	0	0	0	1	0	0	0	0	0	0	0	0	0	0	0	1	74.4424	0
829	0	1	27	0	0	0	0	0	0	0	0	0	0	1	0	0	0	0	0	0	0	0	0	1	38.5651	0
830	1	1	67	0	0	0	0	0	0	0	0	0	0	0	1	0	0	0	0	0	0	1	0	1	84.9995	1
831	0	1	27	0	0	0	0	0	0	0	1	0	0	1	0	0	0	0	0	0	0	0	0	1	38.5651	0
832	0	0	25	0	0	1	0	0	0	0	0	0	0	0	0	0	0	0	0	0	0	1	0	1	16.6667	0
833	0	1	56	0	0	0	0	0	0	0	0	0	0	0	0	0	0	0	0	0	0	0	0	1	51.1111	0
834	1	1	51	0	0	1	0	0	0	0	0	0	0	0	0	0	0	0	0	0	0	1	0	1	67.2218	0
835	0	1	23	0	1	0	0	0	0	0	0	0	0	0	0	0	1	0	0	0	0	0	0	1	14.4444	0
836	0	1	20	1	1	0	1	0	0	0	1	0	0	0	0	0	0	0	0	0	0	0	0	1	46.4878	0
837	1	0	51	0	0	1	0	0	0	0	0	0	1	1	0	0	0	0	0	0	0	1	0	1	86.898	1
838	1	0	69	0	0	0	0	0	0	0	0	1	0	0	0	0	0	0	0	0	0	1	0	1	118.331	1
839	1	1	67	0	0	0	0	0	0	0	0	0	0	0	0	0	0	0	0	0	0	0	0	1	84.9995	1
840	1	1	61	1	1	0	1	0	0	1	0	0	0	0	0	0	0	0	0	0	0	1	1	1	174.895	1
841	1	1	25	1	0	0	0	0	0	0	0	0	0	0	0	0	0	0	0	0	0	0	0	1	59.5567	0
842	0	1	22	1	1	0	1	0	0	0	0	0	0	0	0	0	0	0	0	0	0	0	0	1	48.71	0
843	1	0	51	0	0	0	0	0	0	0	0	0	0	0	0	1	0	0	0	0	0	0	0	1	67.2218	0
844	0	1	53	0	0	1	0	0	0	0	0	0	0	0	0	0	0	0	0	0	0	0	0	1	47.7778	0
845	1	0	36	0	0	0	0	0	0	0	0	0	1	0	0	0	0	0	0	0	0	0	0	1	50.5551	0
846	1	1	67	0	0	0	0	0	0	0	0	0	0	0	0	0	0	1	0	0	0	1	0	1	84.9995	1
847	0	1	25	0	0	0	0	0	0	0	1	0	0	0	0	0	0	0	0	0	0	1	0	1	16.6667	0
848	0	0	34	0	0	0	0	0	0	0	0	0	0	0	0	0	0	0	0	0	0	0	0	1	26.6667	0
849	0	1	25	0	0	0	0	0	0	0	0	0	0	0	0	0	0	0	0	0	0	0	0	1	16.6667	0
850	1	0	67	0	0	0	0	0	0	0	0	0	0	0	0	0	0	0	0	0	0	1	0	1	84.9995	1
851	0	1	29	0	0	0	0	0	0	0	0	0	0	0	0	0	0	0	0	0	0	1	0	1	21.1111	0
852	0	1	35	0	0	0	0	0	0	0	0	0	0	1	0	0	0	0	0	0	0	0	0	1	47.454	0
853	1	0	59	0	0	0	0	0	0	0	0	0	0	0	0	0	0	0	0	0	0	1	0	1	76.1107	1
854	1	1	61	0	0	0	0	0	0	0	0	0	0	0	0	0	0	0	0	0	0	0	0	1	78.3329	1
855	1	1	64	0	0	0	0	0	0	0	0	0	0	0	0	0	0	0	0	0	1	1	1	1	81.6662	1
856	1	0	59	0	0	1	0	0	0	0	0	0	0	1	0	0	0	0	0	0	0	1	0	1	95.7869	1
857	0	0	28	0	0	0	0	0	0	0	0	0	0	1	0	0	0	0	0	0	0	0	0	1	39.6762	0
858	1	1	46	0	0	1	0	0	1	0	0	0	0	0	0	0	0	0	0	0	0	0	0	1	61.6662	0
859	0	1	35	1	1	0	0	0	0	0	0	1	0	0	0	0	0	0	1	0	0	0	0	1	117.051	1
860	0	1	36	0	0	0	0	0	0	0	0	0	0	0	0	0	0	0	0	0	0	1	1	1	28.8889	0
861	1	0	70	1	0	0	0	0	0	0	0	0	0	0	0	0	0	0	0	0	0	1	0	1	109.557	1
862	0	1	39	1	1	0	1	0	0	0	0	0	0	1	0	0	0	0	0	0	0	0	0	1	87.2751	1
863	0	1	28	0	0	0	0	0	0	0	1	0	0	0	0	0	0	0	0	0	0	0	0	1	20	0
864	1	1	56	0	0	0	0	0	0	0	0	0	0	0	1	0	0	0	0	0	0	0	0	1	72.7773	0
865	0	1	45	0	0	1	0	0	0	0	0	0	0	0	0	0	0	0	0	0	0	0	0	1	38.8889	0
866	0	1	30	0	0	0	0	0	0	0	0	0	0	0	0	0	0	0	0	0	0	0	0	1	22.2222	0
867	0	1	37	0	0	0	0	0	0	0	0	0	0	0	0	0	0	0	0	0	0	1	0	1	30	0
868	0	1	53	0	0	0	0	0	0	0	0	0	0	0	1	0	0	0	0	0	0	1	0	1	47.7778	0
869	1	0	62	0	0	1	0	0	0	0	0	0	0	0	0	0	0	0	0	0	0	1	0	1	79.444	1
870	0	1	48	0	0	0	0	0	0	0	0	0	0	0	0	0	0	0	0	0	0	0	0	1	42.2222	0
871	1	1	54	0	1	0	0	0	0	0	0	0	0	0	0	0	0	0	0	0	0	0	0	1	70.5551	0
872	1	1	37	0	0	0	0	0	0	0	0	0	1	0	0	0	0	0	0	0	0	0	0	1	51.6662	0
873	0	1	47	0	0	0	0	0	0	0	0	0	0	1	0	0	0	0	0	0	0	1	0	1	60.7873	0
874	0	1	20	1	1	0	1	0	0	0	0	0	0	0	1	0	0	0	0	0	0	1	0	1	46.4878	0
875	0	1	32	0	0	0	0	0	0	0	0	0	0	0	0	0	0	0	0	0	0	0	0	1	24.4444	0
876	0	1	33	0	0	0	0	0	0	0	0	0	1	0	0	0	0	0	0	0	0	0	0	1	25.5556	0
877	1	0	69	0	0	0	0	0	0	0	0	0	0	0	0	0	0	0	0	0	0	1	0	1	87.2218	1
878	0	1	24	1	1	0	1	0	0	0	1	0	0	0	1	0	0	0	0	0	0	0	0	1	50.9322	0
879	0	1	36	0	0	0	0	0	0	0	0	0	0	0	0	0	0	0	0	0	0	0	0	1	28.8889	0
880	0	1	40	0	0	1	0	0	0	0	0	0	1	0	0	0	0	0	0	0	0	0	0	1	33.3333	0
881	0	1	37	0	0	0	0	0	0	0	0	0	0	1	0	0	0	0	0	0	0	1	0	1	49.6762	0
882	0	1	32	0	0	0	0	0	0	0	0	1	0	0	1	0	0	0	0	0	0	1	0	1	55.5535	0
883	0	1	35	0	1	0	0	0	0	0	0	0	0	0	0	0	0	0	0	0	0	1	0	1	27.7778	0
884	0	1	26	0	1	0	1	0	0	0	0	0	0	1	0	0	0	0	0	0	0	0	0	1	51.6069	0
885	0	1	23	1	1	0	1	0	0	0	0	0	0	0	0	0	0	0	0	0	0	1	0	1	49.8211	0
886	0	0	29	0	1	0	0	0	0	0	0	1	0	0	0	0	0	0	1	0	0	0	0	1	89.1606	1
887	0	0	23	1	1	0	0	0	0	0	0	0	0	0	0	0	0	0	0	0	0	0	0	1	35.6682	0
888	1	0	54	0	0	1	0	1	1	0	0	0	1	0	0	0	0	0	0	0	0	1	0	1	108.728	1
889	0	0	27	0	0	0	0	0	0	0	0	0	0	0	0	0	0	0	0	0	0	0	0	1	18.8889	0
890	1	0	50	0	0	1	0	0	0	0	0	0	0	1	0	0	0	0	0	0	0	0	0	1	85.7869	1
891	0	1	48	0	0	0	0	0	0	0	0	0	0	0	0	0	0	0	0	0	0	0	0	1	42.2222	0
892	0	1	55	0	0	1	0	0	0	0	0	0	0	0	0	0	0	0	0	0	0	1	0	1	50	0
893	0	1	44	0	0	0	0	0	0	0	0	0	0	1	0	0	0	0	0	0	0	0	0	1	57.454	0
894	0	0	32	0	0	0	0	0	0	0	0	0	1	1	0	0	0	0	0	0	0	0	0	1	44.1207	0
895	0	1	27	1	1	0	1	0	0	0	0	1	0	0	0	0	0	0	0	0	0	0	0	1	85.3746	1
896	0	1	36	0	0	0	0	0	0	0	0	0	0	0	0	0	0	0	0	0	0	0	0	1	28.8889	0
897	1	0	55	0	0	0	0	0	0	0	0	0	0	0	0	0	0	1	0	0	0	0	0	1	71.6662	0
898	1	0	75	0	0	1	0	0	0	0	0	0	0	0	0	0	0	0	0	0	0	0	0	1	93.8884	1
899	0	1	26	0	0	0	0	0	0	0	0	0	0	0	0	0	0	0	0	0	0	1	1	1	17.7778	0
900	0	1	25	1	1	0	0	0	0	0	0	0	0	0	0	0	0	0	0	0	0	0	0	1	37.8904	0
901	0	0	50	0	0	0	0	0	0	0	0	0	0	0	0	0	0	0	0	0	0	1	0	1	44.4444	0
902	1	0	68	0	0	0	0	0	0	0	0	0	0	0	0	0	0	0	0	0	0	0	0	1	86.1107	1
903	0	1	40	0	0	1	0	0	0	0	0	0	0	0	0	0	0	0	0	0	0	1	0	1	33.3333	0
904	1	0	23	0	0	0	0	0	0	0	0	0	1	0	0	0	0	0	0	0	0	1	0	1	36.1107	0
905	0	0	30	0	0	0	0	0	0	0	0	0	0	1	0	0	0	0	0	0	0	0	0	1	41.8985	0
906	1	1	62	1	0	0	0	0	0	0	0	1	0	0	0	0	0	0	0	0	0	0	0	1	131.777	1
907	1	0	33	0	0	0	0	0	0	0	0	0	0	0	0	0	0	0	0	0	0	1	0	1	47.2218	0
908	0	0	22	0	0	0	0	0	0	0	1	0	0	0	0	0	0	0	0	0	0	0	0	1	13.3333	0
909	1	1	41	0	0	0	0	0	0	0	0	1	0	0	1	0	0	0	0	0	0	0	0	1	87.2197	1
910	0	0	40	1	0	0	0	0	0	0	1	0	0	0	0	0	0	0	0	0	0	0	0	1	54.5571	0
911	0	1	51	0	0	0	0	0	0	0	0	0	0	0	0	0	0	0	0	0	0	1	0	1	45.5555	0
912	1	0	36	0	0	1	0	0	0	0	0	0	0	0	0	0	0	0	0	0	0	1	0	1	50.5551	0
913	0	1	32	0	0	1	0	0	0	0	0	0	0	0	0	0	0	0	0	0	0	1	0	1	24.4444	0
914	0	1	33	0	0	0	0	0	0	0	0	0	0	0	0	0	0	0	0	0	0	0	0	1	25.5556	0
915	0	1	54	0	0	0	0	0	0	0	0	1	0	0	0	0	0	0	0	0	0	1	1	1	79.9979	1
916	0	1	35	0	0	0	0	0	0	0	0	0	0	0	0	0	0	0	0	0	0	0	0	1	27.7778	0
917	1	0	65	0	0	0	0	0	0	0	0	0	0	1	0	0	0	0	0	0	0	1	0	1	102.454	1
918	0	1	28	0	0	0	0	0	0	0	0	0	0	0	0	0	0	0	0	0	0	1	0	1	20	0
919	0	1	33	0	0	0	0	0	0	0	0	0	0	0	0	0	0	0	0	0	0	0	0	1	25.5556	0
920	1	0	17	0	0	0	0	0	0	0	1	0	0	0	0	0	0	0	0	0	0	0	0	1	29.444	0
921	0	1	34	0	0	0	0	0	0	0	0	0	0	0	0	0	0	0	0	0	0	0	0	1	26.6667	0
922	0	1	27	0	0	1	0	0	0	0	1	0	0	0	0	0	0	0	0	0	0	0	0	1	18.8889	0
923	0	0	32	0	0	0	0	0	0	0	0	0	0	0	0	0	0	0	0	0	0	0	0	1	24.4444	0
924	0	0	36	0	0	1	0	0	0	0	0	0	0	0	0	0	0	0	0	0	0	1	0	1	28.8889	0
925	0	1	37	0	0	0	0	0	0	0	0	0	0	0	0	0	0	0	0	0	0	0	0	1	30	0
926	0	1	35	0	0	0	0	0	0	0	0	0	0	0	0	0	0	0	0	0	0	0	0	1	27.7778	0
927	0	1	27	0	0	0	0	0	0	0	0	0	0	0	0	0	0	0	0	0	0	0	0	1	18.8889	0
928	1	1	23	0	0	0	0	0	0	0	0	0	1	0	0	0	0	0	0	0	0	1	0	1	36.1107	0
929	0	1	22	0	0	0	0	0	0	0	1	0	0	0	0	0	0	0	0	0	0	0	0	1	13.3333	0
930	1	0	80	0	0	0	0	0	0	0	0	0	0	0	0	0	0	0	0	0	0	1	0	1	99.444	1
931	0	1	51	0	0	0	0	0	0	0	0	0	0	0	0	0	0	0	0	0	0	1	0	1	45.5555	0
932	0	1	36	0	0	0	0	0	0	0	0	0	1	0	0	0	0	0	0	0	0	0	0	1	28.8889	0
933	0	1	30	0	0	0	0	0	0	0	0	0	0	0	0	0	0	0	0	0	0	0	0	1	22.2222	0
934	1	1	62	0	0	0	0	0	1	0	0	0	0	0	0	0	0	0	0	0	0	1	0	1	79.444	1
935	0	1	21	0	0	0	0	0	0	0	0	0	0	0	0	0	0	0	0	0	0	1	0	1	12.2222	0
936	0	1	33	0	0	0	0	0	0	0	0	0	0	0	0	0	0	0	0	0	0	0	0	1	25.5556	0
937	0	1	33	0	0	0	0	0	0	0	0	0	0	0	0	0	0	0	0	0	0	0	0	1	25.5556	0
938	0	1	27	1	1	0	1	0	0	0	0	0	0	0	0	0	0	0	1	0	0	1	0	1	91.2061	1
939	1	1	60	0	0	1	0	0	0	0	0	0	1	0	0	0	0	0	0	0	0	0	0	1	77.2218	1
940	1	1	83	0	0	0	0	0	0	0	0	0	0	0	0	0	0	0	0	0	0	1	1	1	102.777	1
941	0	1	25	0	1	0	0	0	0	0	0	0	1	0	0	0	0	0	0	0	0	0	0	1	16.6667	0
942	0	1	32	0	0	0	0	0	0	0	0	0	1	0	0	0	0	0	0	0	0	0	0	1	24.4444	0
943	1	1	57	0	1	0	0	0	0	1	0	0	0	0	1	0	0	0	0	0	0	1	0	1	135.074	1
944	1	1	58	0	0	0	0	0	0	0	0	0	0	1	0	0	0	0	0	0	0	0	0	1	94.6758	1
945	0	1	37	0	0	0	0	0	0	0	0	0	0	0	0	0	0	0	0	0	0	0	0	1	30	0
946	0	1	54	0	1	0	0	0	0	0	0	0	0	0	0	0	0	0	0	0	0	1	1	1	48.8889	0
947	0	1	24	0	0	0	0	1	1	0	0	0	1	0	0	0	0	0	0	0	0	1	0	1	53.7285	0
948	0	1	21	1	1	0	1	0	0	0	0	0	0	0	0	0	0	0	0	0	0	1	0	1	47.5989	0
949	1	0	51	0	0	1	0	0	0	0	0	0	0	0	0	0	0	0	0	0	0	0	0	1	67.2218	0
950	0	1	25	0	0	0	0	0	0	0	0	0	0	0	0	0	0	0	0	0	0	0	0	1	16.6667	0
951	0	1	48	0	0	1	0	0	0	0	0	0	0	0	0	0	0	0	0	0	0	0	0	1	42.2222	0
952	1	0	74	0	0	0	0	0	0	0	0	1	0	0	1	0	0	0	0	0	0	1	0	1	123.886	1
953	0	1	54	0	0	0	0	0	0	0	0	0	0	0	0	0	0	0	0	0	0	1	0	1	48.8889	0
954	0	1	35	0	0	0	0	0	0	0	0	0	0	0	0	0	0	0	0	0	0	0	0	1	27.7778	0
955	0	1	23	0	1	0	0	0	0	0	0	0	0	0	0	0	0	0	0	0	0	0	0	1	14.4444	0
956	1	0	78	0	0	1	0	0	0	0	0	0	0	0	0	0	0	0	0	0	0	0	0	1	97.2218	1
957	1	1	33	0	0	0	0	0	0	0	0	1	0	0	0	0	0	0	0	0	0	1	0	1	78.3308	1
958	1	0	68	0	0	1	0	0	0	0	0	0	0	0	0	0	0	0	0	0	0	0	0	1	86.1107	1
959	1	1	48	0	0	1	0	0	0	0	0	0	1	0	1	0	0	0	0	0	0	0	0	1	63.8884	0
960	0	1	37	0	0	0	0	0	0	0	0	0	0	0	0	0	0	0	0	0	0	0	0	1	30	0
961	1	1	77	0	0	0	0	0	0	0	0	0	0	0	0	0	0	0	0	0	0	1	1	1	96.1107	1
962	0	1	40	0	1	0	0	0	0	0	0	0	0	0	0	0	0	0	0	0	0	1	0	1	33.3333	0
963	1	0	57	0	0	0	0	0	0	1	0	0	0	0	0	0	0	0	0	0	0	1	1	1	135.074	1
964	0	0	48	1	1	0	1	0	0	0	0	0	0	0	0	0	0	0	0	0	0	0	0	1	77.5989	1
965	1	1	18	0	0	0	0	0	0	0	0	0	0	0	0	0	0	0	0	0	0	0	0	1	30.5551	0
966	0	1	53	0	0	0	0	0	0	0	0	0	0	0	0	0	0	0	0	0	0	0	0	1	47.7778	0
967	0	1	35	1	1	0	0	0	0	0	1	0	0	0	0	0	0	0	0	0	0	0	0	1	49.0016	0
968	0	1	31	0	0	0	0	0	0	0	0	0	0	0	0	0	0	0	0	0	0	0	0	1	23.3333	0
969	1	1	24	0	0	0	0	0	0	0	1	0	0	0	0	0	0	0	0	0	0	0	0	1	37.2218	0
970	0	0	39	0	0	0	0	0	0	0	1	0	0	0	0	0	0	0	0	0	0	0	0	1	32.2222	0
971	1	0	37	0	0	1	0	0	0	0	0	0	0	0	0	0	0	0	0	0	0	0	0	1	51.6662	0
972	0	1	34	0	0	0	0	0	0	0	0	0	0	0	0	0	0	0	0	0	0	0	0	1	26.6667	0
973	0	1	32	0	0	0	0	0	0	0	0	0	0	0	0	0	0	0	0	0	0	0	0	1	24.4444	0
974	0	1	34	1	0	0	0	0	0	0	1	0	0	0	1	0	0	0	0	0	0	0	0	1	47.8904	0
975	1	1	58	0	0	0	0	0	1	0	0	1	0	0	0	0	0	0	0	0	0	1	1	1	106.109	1
976	0	0	33	0	0	0	0	0	0	0	0	0	0	0	0	0	0	0	0	0	0	0	0	1	25.5556	0
977	0	1	39	0	0	0	0	0	0	0	0	0	0	0	0	0	0	0	0	0	0	0	0	1	32.2222	0
978	1	0	52	0	0	0	0	0	1	0	0	0	1	1	0	0	0	0	0	0	0	1	0	1	88.0091	1
979	1	0	66	0	0	0	0	0	0	0	0	0	0	1	0	0	0	0	0	0	0	1	0	1	103.565	1
980	0	1	56	0	0	0	0	0	0	0	0	0	0	0	0	0	0	0	0	0	0	0	0	1	51.1111	0
981	0	1	22	1	0	0	0	0	0	0	0	0	0	1	0	0	0	0	0	0	0	0	0	1	54.2333	0
982	1	0	72	0	0	0	0	0	0	0	0	0	1	0	0	0	0	0	0	0	0	1	0	1	90.5551	1
983	1	0	60	0	0	0	0	0	0	0	0	0	0	0	0	0	0	0	0	0	1	1	0	1	77.2218	1
984	0	0	52	0	0	0	0	0	0	0	0	0	0	1	0	0	0	0	0	0	0	0	0	1	66.3429	0
985	0	1	20	1	0	0	0	0	0	0	0	0	1	0	0	0	0	0	0	0	0	0	0	1	32.3349	0
986	0	1	30	1	0	0	0	0	0	0	0	0	0	0	0	0	0	0	0	0	0	0	0	1	43.446	0
987	1	0	37	0	1	0	0	1	1	0	0	1	0	0	0	0	0	0	0	0	0	1	1	1	120.948	1
988	0	1	24	0	0	0	0	0	0	0	0	0	0	0	0	0	0	0	0	0	0	0	0	1	15.5556	0
989	0	1	34	0	0	0	0	0	0	0	0	0	0	0	0	0	0	0	0	0	0	1	0	1	26.6667	0
990	0	1	22	0	0	0	0	0	0	0	1	0	0	0	0	0	0	0	0	0	0	0	0	1	13.3333	0
991	0	0	28	0	0	0	0	0	0	0	0	0	0	0	0	0	0	0	0	0	0	1	0	1	20	0
992	0	1	20	0	0	0	0	0	0	0	0	0	0	0	0	0	0	0	0	0	0	0	0	1	11.1111	0
993	1	0	53	0	0	0	0	0	0	0	0	0	0	0	0	0	0	0	0	0	0	0	0	1	69.444	0
994	1	0	55	0	0	1	0	0	0	0	0	0	0	1	0	0	0	0	0	0	0	1	1	1	91.3424	1
995	0	1	27	1	1	0	1	0	0	0	0	0	0	0	0	0	0	0	0	0	0	0	0	1	54.2656	0
996	0	1	44	0	0	0	0	0	0	0	0	0	0	0	0	0	0	0	0	0	0	0	0	1	37.7778	0
997	0	1	48	0	0	0	0	0	0	0	0	0	0	0	0	0	0	0	0	0	0	0	0	1	42.2222	0
998	1	0	64	0	0	0	0	0	0	0	0	0	0	1	0	0	0	0	0	0	0	1	0	1	101.342	1
999	0	1	31	0	0	0	0	0	0	0	0	0	0	0	0	0	0	0	0	0	0	0	0	1	23.3333	0
1000	1	0	24	0	0	0	0	0	0	0	0	0	0	0	0	0	0	0	0	0	0	0	0	1	37.2218	0
1001	1	0	42	0	0	0	0	0	0	0	0	0	0	1	0	0	0	0	0	0	0	1	0	1	76.898	1
1002	0	1	28	0	0	0	0	0	0	0	0	0	0	0	0	0	0	0	0	0	0	0	0	1	20	0
1003	0	0	38	0	0	0	0	0	0	0	0	0	0	0	0	0	0	0	0	0	0	1	0	1	31.1111	0
1004	0	1	32	0	0	0	0	0	0	0	0	0	0	0	0	0	0	0	0	0	0	0	0	1	24.4444	0
1005	1	0	70	0	0	0	0	0	0	0	0	0	0	0	0	0	0	0	0	0	0	1	0	1	88.3329	1
1006	1	0	45	0	0	0	0	0	0	0	0	0	1	0	0	0	0	0	0	0	0	1	0	1	60.5551	0
1007	0	1	30	0	0	0	0	0	0	0	0	0	0	0	0	0	0	0	0	0	0	0	0	1	22.2222	0
1008	0	1	24	0	0	0	0	0	0	0	0	0	0	1	0	0	0	0	0	0	0	0	0	1	35.2318	0
1009	0	1	26	0	0	0	0	0	0	0	0	0	0	0	0	0	0	0	0	0	0	0	0	1	17.7778	0
1010	1	1	72	0	0	1	0	1	1	0	0	0	0	0	0	0	0	0	0	0	0	1	1	1	128.728	1
1011	1	1	60	0	0	1	0	0	0	0	0	0	0	0	0	0	0	0	0	0	0	0	0	1	77.2218	1
1012	0	1	26	1	0	0	0	0	0	0	0	0	0	0	0	0	0	0	0	0	0	0	0	1	39.0016	0
1013	0	1	29	0	0	0	0	0	0	0	1	0	0	1	0	0	0	0	0	0	0	0	0	1	40.7873	0
1014	1	0	63	0	0	1	0	0	0	0	0	0	0	1	0	0	0	0	0	0	0	1	0	1	100.231	1
1015	0	1	33	1	1	0	1	0	0	0	0	0	0	0	0	0	0	0	0	0	0	1	0	1	60.9322	0
1016	0	1	33	0	0	1	0	0	0	0	1	0	0	0	0	0	0	0	0	0	0	1	0	1	25.5556	0
1017	1	0	67	0	0	0	0	0	1	1	0	0	0	0	0	0	0	0	0	0	0	1	1	1	146.185	1
1018	1	1	45	0	0	0	0	0	0	0	0	0	0	0	0	0	0	0	0	0	0	0	0	1	60.5551	0
1019	0	1	38	0	1	0	0	0	0	0	0	0	0	0	0	0	0	0	0	0	0	0	0	1	31.1111	0
1020	0	1	28	0	0	0	0	0	0	0	1	0	0	0	0	0	0	0	0	0	0	1	0	1	20	0
1021	1	1	76	0	0	1	0	0	0	0	0	0	0	0	0	0	0	0	0	0	0	1	0	1	94.9995	1
1022	0	1	38	0	0	0	0	0	0	0	1	0	0	0	0	0	0	0	0	0	0	0	0	1	31.1111	0
1023	0	1	43	0	0	0	0	0	0	0	0	0	0	0	0	0	0	0	0	0	0	1	0	1	36.6667	0
1024	0	1	29	1	0	0	0	0	0	0	0	0	0	0	0	0	0	0	1	0	0	0	0	1	79.2754	1
1025	1	1	22	1	0	0	0	0	0	0	1	0	0	0	0	0	0	0	0	0	0	0	0	1	56.2233	0
1026	1	1	66	0	0	0	0	0	0	0	0	0	0	0	0	0	0	0	0	0	0	0	0	1	83.8884	1
1027	0	1	36	0	0	0	0	0	0	0	0	0	0	0	0	0	0	0	0	0	0	0	0	1	28.8889	0
1028	0	1	25	1	0	0	0	0	0	0	0	0	0	0	0	0	0	0	0	0	0	0	0	1	37.8904	0
1029	0	1	38	0	0	1	0	0	0	0	0	0	0	0	0	0	0	0	0	0	0	1	0	1	31.1111	0
1030	0	1	36	0	0	0	0	0	0	0	0	0	0	0	0	0	0	0	0	0	0	0	0	1	28.8889	0
1031	0	1	31	0	0	0	0	0	0	0	0	0	0	0	0	0	0	0	0	0	0	0	0	1	23.3333	0
1032	1	1	70	0	0	0	0	0	0	0	0	0	0	0	1	0	0	0	0	0	0	1	1	1	88.3329	1
1033	1	1	61	0	0	0	0	0	0	0	0	0	0	0	0	0	0	0	0	1	0	1	1	1	78.3329	1
1034	0	1	28	0	0	0	0	0	0	0	0	0	0	0	0	0	0	0	0	0	0	0	0	1	20	0
1035	0	1	48	0	0	0	0	0	0	0	0	0	0	0	0	0	0	0	0	0	1	1	0	1	42.2222	0
1036	1	0	34	0	0	0	0	0	0	0	0	1	0	1	0	0	0	0	0	0	0	1	1	1	99.1181	1
1037	1	0	59	1	0	0	0	0	0	0	0	0	0	0	0	0	0	0	0	0	0	1	1	1	97.3344	1
1038	1	1	49	1	1	0	1	0	0	0	0	0	0	0	0	0	0	0	0	0	0	1	0	1	100.376	1
1039	0	1	41	1	1	0	0	0	0	0	0	0	0	0	0	0	0	0	0	0	0	1	0	1	55.6682	0
1040	0	1	35	0	0	1	0	0	0	0	0	0	0	1	0	0	0	0	0	0	0	0	0	1	47.454	0
1041	0	0	77	0	0	0	0	0	0	0	0	0	0	0	0	0	0	0	0	0	0	1	0	1	74.4444	0
1042	0	1	53	0	0	0	0	0	0	0	0	0	0	0	0	0	0	0	0	0	0	0	0	1	47.7778	0
1043	0	1	35	1	0	0	0	0	0	0	0	0	0	0	0	0	0	0	0	0	0	0	0	1	49.0016	0
1044	0	1	23	1	0	0	0	0	0	0	0	0	0	0	0	0	0	0	0	0	0	0	0	1	35.6682	0
1045	0	1	37	0	0	0	0	0	0	0	0	0	0	0	0	0	0	0	0	0	0	1	0	1	30	0
1046	1	1	75	0	0	0	0	0	0	0	0	0	0	0	0	0	0	0	0	0	0	1	0	1	93.8884	1
1047	1	0	77	0	0	0	0	0	0	0	0	0	1	0	0	0	0	0	0	0	0	1	1	1	96.1107	1
1048	0	1	23	0	0	0	0	0	0	0	1	0	0	0	0	0	0	0	0	0	0	1	0	1	14.4444	0
1049	0	0	46	0	0	0	0	0	0	0	0	0	0	0	0	0	0	0	0	0	0	0	0	1	40	0
1050	1	1	54	0	0	0	0	0	0	0	0	0	0	0	0	0	0	0	0	0	1	1	0	1	70.5551	0
1051	1	1	78	0	0	0	0	0	0	0	0	0	0	0	0	0	0	0	0	0	0	1	0	1	97.2218	1
1052	1	0	16	0	0	1	0	0	0	0	0	0	0	0	0	0	0	0	0	0	0	1	0	1	28.3329	0
1053	1	0	68	0	0	0	0	0	0	0	0	0	0	1	0	0	0	0	0	0	0	0	0	1	105.787	1
1054	1	1	32	0	0	0	1	0	0	0	1	0	0	0	0	0	0	0	0	0	0	1	0	1	60.2636	0
1055	1	0	36	0	0	1	0	0	0	0	0	0	0	0	0	0	0	0	0	0	0	1	0	1	50.5551	0
1056	1	0	57	0	0	0	0	0	1	0	0	0	0	0	0	0	0	0	0	0	0	1	0	1	73.8884	0
1057	0	1	37	0	0	0	0	0	0	0	0	0	0	0	0	0	0	0	0	0	0	0	0	1	30	0
1058	0	1	24	1	1	0	0	0	0	0	0	0	0	0	0	0	0	0	0	0	0	0	0	1	36.7793	0
1059	0	0	28	1	1	0	1	0	0	0	0	1	0	0	0	0	0	0	0	0	0	0	0	1	86.4857	1
1060	1	0	60	0	0	0	0	0	0	0	0	0	0	0	1	0	0	0	0	0	0	1	0	1	77.2218	1
1061	1	1	27	0	0	0	0	0	0	0	0	0	0	0	0	0	0	0	0	0	0	0	0	1	40.5551	0
1062	0	0	48	0	0	0	0	0	0	0	0	0	0	0	0	0	0	0	0	0	0	1	1	1	42.2222	0
1063	1	0	57	0	0	0	0	0	0	0	0	0	0	1	0	0	0	0	0	0	0	1	1	1	93.5647	1
1064	0	1	24	0	0	0	0	0	0	0	0	0	0	0	0	0	0	0	0	0	0	0	0	1	15.5556	0
1065	1	1	33	0	0	0	0	0	0	0	0	0	1	0	0	0	0	0	0	0	0	0	0	1	47.2218	0
1066	0	1	33	0	0	1	0	0	0	0	0	0	0	0	0	0	0	0	0	0	0	0	0	1	25.5556	0
1067	0	1	37	0	0	0	0	0	0	0	1	0	0	0	0	0	0	0	0	0	0	0	0	1	30	0
1068	0	1	47	0	0	0	0	0	0	0	0	0	0	1	0	0	0	0	0	0	0	0	0	1	60.7873	0
1069	0	0	55	0	0	0	0	0	0	0	0	0	0	0	0	0	0	0	0	0	0	1	0	1	50	0
1070	1	0	78	0	0	0	0	0	0	0	0	0	0	0	0	0	0	0	0	0	0	1	0	1	97.2218	1
1071	0	1	45	1	1	0	1	0	0	0	0	0	0	0	0	0	0	0	0	0	0	0	0	1	74.2656	0
1072	0	0	26	0	0	0	0	0	0	0	0	0	0	0	0	0	0	0	0	0	0	0	0	1	17.7778	0
1073	0	1	28	1	1	0	1	0	0	0	0	0	0	0	0	0	0	0	0	0	0	0	0	1	55.3767	0
1074	0	1	21	0	0	0	0	0	0	0	0	0	0	1	0	0	0	0	0	0	0	1	0	1	31.8985	0
1075	1	0	47	0	0	0	0	0	0	0	0	0	0	0	0	0	0	0	0	0	0	0	0	1	62.7773	0
1076	1	0	52	0	0	0	0	0	0	0	0	0	0	0	0	0	0	0	0	0	0	0	0	1	68.3329	0
1077	0	1	31	0	0	1	0	0	0	0	0	0	0	0	0	0	0	0	0	0	0	1	0	1	23.3333	0
1078	0	1	69	0	1	0	0	0	0	0	0	0	0	0	0	0	0	0	1	0	0	0	0	1	102.496	1
1079	1	1	54	0	0	0	0	0	0	0	0	0	0	0	0	0	0	0	0	0	0	1	0	1	70.5551	0
1080	0	0	45	0	0	0	0	0	0	0	0	0	0	0	0	0	0	0	1	0	0	1	1	1	75.8294	0
1081	1	1	68	0	0	0	0	0	0	0	0	1	0	0	0	0	0	0	0	0	0	0	0	1	117.22	1
1082	0	1	36	1	0	0	0	0	0	0	0	0	0	0	0	0	0	0	0	0	0	1	1	1	50.1127	0
1083	0	1	38	0	0	0	0	0	0	0	0	0	0	0	0	0	0	0	0	0	0	0	0	1	31.1111	0
1084	0	1	31	1	0	0	0	0	0	0	0	0	0	0	0	0	0	0	0	0	0	1	0	1	44.5571	0
1085	0	0	78	1	1	0	1	0	0	0	0	0	0	0	0	0	0	0	0	0	0	1	1	1	110.932	1
1086	1	1	26	0	0	0	0	0	0	0	0	0	0	0	0	0	0	0	0	0	0	1	0	1	39.444	0
1087	0	1	34	1	1	0	1	0	0	0	0	0	0	0	0	0	0	0	0	0	0	1	0	1	62.0433	0
1088	1	1	64	1	1	0	1	0	0	0	0	0	0	1	0	0	0	0	1	0	0	1	1	1	173.66	1
1089	0	0	26	0	0	0	0	0	0	0	0	1	0	0	0	0	0	0	1	0	0	0	0	1	85.8273	1
1090	1	0	62	0	0	1	0	0	0	0	0	0	1	0	1	0	0	0	0	0	0	1	0	1	79.444	1
1091	0	1	52	0	0	0	0	0	0	0	0	0	0	0	1	0	0	0	0	0	0	0	0	1	46.6667	0
1092	0	0	40	0	0	0	0	0	0	0	0	0	0	0	0	0	0	0	0	0	0	1	0	1	33.3333	0
1093	1	1	73	0	0	0	0	0	0	0	0	0	0	0	0	0	0	0	1	0	0	0	0	1	128.607	1
1094	1	0	78	0	0	0	0	0	0	0	0	0	0	1	0	0	0	0	0	0	0	0	0	1	116.898	1
1095	0	1	41	0	0	0	0	0	0	0	0	0	0	0	0	0	0	0	0	0	0	1	0	1	34.4444	0
1096	0	1	28	0	0	0	0	0	0	0	0	0	0	0	0	0	0	0	0	0	0	0	0	1	20	0
1097	0	0	44	1	1	0	1	0	0	0	0	0	0	0	0	0	0	0	0	0	0	0	0	1	73.1544	0
1098	1	1	64	0	0	0	0	0	0	0	0	0	0	0	0	0	0	0	1	0	0	1	1	1	118.607	1
1099	1	0	67	0	0	1	0	0	0	0	0	0	0	0	0	0	0	0	0	0	0	1	0	1	84.9995	1
1100	1	0	68	0	0	0	0	0	0	0	0	0	0	0	0	0	0	0	0	0	0	0	0	1	86.1107	1
1101	0	1	26	1	1	0	0	0	0	0	0	0	0	0	0	0	0	0	0	0	0	0	0	1	39.0016	0
1102	0	1	22	1	1	0	0	0	0	0	1	0	0	0	0	0	0	0	0	0	0	0	0	1	34.5571	0
1103	1	0	55	0	0	0	0	0	0	0	1	0	0	0	0	0	0	0	0	0	0	0	0	1	71.6662	0
1104	1	1	84	0	0	0	1	0	0	0	0	1	0	0	0	0	0	0	0	0	0	1	1	1	149.15	1
1105	1	0	55	0	0	1	0	0	0	0	0	0	0	0	0	0	0	0	0	0	0	0	0	1	71.6662	0
1106	1	0	65	0	0	0	0	0	0	0	0	0	0	1	0	0	0	0	0	0	0	1	0	1	102.454	1
1107	0	1	25	0	0	0	0	0	0	0	0	0	0	0	0	0	0	0	0	0	0	0	0	1	16.6667	0
1108	0	0	21	0	0	0	0	0	0	0	1	0	0	1	0	0	0	0	0	0	0	0	0	1	31.8985	0
1109	1	1	49	0	0	0	0	0	0	0	0	0	0	0	0	0	0	0	0	0	0	0	0	1	64.9995	0
1110	1	0	83	0	0	0	0	0	0	0	0	0	0	0	0	0	0	0	0	0	0	1	0	1	102.777	1
1111	1	1	27	0	0	0	0	0	0	0	0	0	1	0	1	0	0	0	0	0	0	0	0	1	40.5551	0
1112	0	1	26	0	0	0	0	0	0	0	0	0	0	0	0	0	0	0	0	0	0	1	0	1	17.7778	0
1113	1	0	47	1	1	0	1	0	0	0	0	0	0	0	0	0	0	0	0	0	0	1	1	1	98.154	1
1114	1	1	42	0	0	0	0	0	0	0	0	0	0	0	0	0	0	0	0	0	0	0	0	1	57.2218	0
1115	1	1	38	0	0	0	0	0	0	0	0	0	0	0	0	0	0	0	0	0	0	0	0	1	52.7773	0
1116	0	1	22	1	0	0	1	0	0	0	0	0	0	0	0	0	0	0	0	0	0	0	0	1	48.71	0
1117	0	1	20	0	0	0	0	0	0	0	0	0	0	0	1	0	0	0	0	0	0	1	0	1	11.1111	0
1118	1	1	84	0	0	0	0	0	0	0	0	1	0	0	0	0	0	1	0	0	0	0	0	1	134.997	1
1119	0	1	44	0	0	0	0	0	0	0	0	0	0	0	0	0	0	0	0	0	0	1	0	1	37.7778	0
1120	1	0	66	0	0	0	0	0	0	0	0	0	0	0	0	0	0	0	0	0	0	1	0	1	83.8884	1
1121	0	1	69	0	0	0	0	0	0	0	0	0	1	1	0	0	0	0	0	0	0	0	0	1	85.2318	1
1122	1	0	74	0	0	0	0	0	0	0	0	0	0	1	0	0	1	0	0	0	0	1	0	1	112.454	1
1123	1	0	57	0	0	1	0	0	0	0	0	0	0	0	0	0	0	0	0	0	0	0	0	1	73.8884	0
1124	1	0	25	0	0	0	0	0	0	0	0	0	1	0	0	0	0	0	0	0	0	1	0	1	38.3329	0
1125	1	0	69	0	0	0	0	0	0	0	0	0	0	0	0	0	0	0	0	0	0	0	0	1	87.2218	1
1126	0	1	25	0	0	0	0	0	0	0	0	0	0	1	0	0	0	0	0	0	0	0	0	1	36.3429	0
1127	1	0	70	0	0	1	0	0	0	0	0	0	0	0	0	0	0	0	0	0	0	1	0	1	88.3329	1
1128	1	0	47	0	0	0	0	0	0	0	0	0	0	0	1	0	0	0	0	0	0	0	0	1	62.7773	0
1129	0	1	52	0	0	0	0	0	0	0	0	1	0	0	0	0	0	0	1	0	0	1	0	1	114.716	1
1130	1	1	40	0	0	0	0	0	0	0	0	0	0	0	0	0	0	0	0	0	0	0	0	1	54.9995	0
1131	0	0	48	0	0	0	1	0	0	0	0	0	0	0	0	0	0	0	0	0	0	1	1	1	56.3751	0
1132	0	1	24	1	1	0	1	0	0	0	1	0	0	1	0	0	0	0	0	0	0	0	0	1	70.6085	0
1133	0	1	26	0	0	0	0	0	0	0	1	0	0	0	0	0	0	0	0	0	0	0	0	1	17.7778	0
1134	0	1	25	0	0	0	0	0	0	0	0	0	0	0	0	0	0	0	0	0	0	0	0	1	16.6667	0
1135	1	1	74	1	1	0	1	0	0	0	0	0	0	0	0	0	0	0	0	0	0	1	1	1	128.154	1
1136	1	1	62	0	0	0	0	0	0	0	0	0	0	0	0	0	0	0	0	0	0	0	0	1	79.444	1
1137	0	1	43	0	1	0	0	0	0	0	0	0	0	0	0	0	0	0	0	0	0	0	0	1	36.6667	0
1138	0	0	54	0	0	0	0	0	0	0	1	0	0	1	0	0	0	0	0	0	0	0	0	1	68.5651	0
1139	1	0	74	0	0	0	0	0	0	0	0	0	0	0	0	0	0	0	0	0	0	0	0	1	92.7773	1
1140	0	1	28	0	0	0	0	0	0	0	0	0	0	0	0	0	0	0	0	0	0	0	0	1	20	0
1141	0	0	21	0	0	0	0	0	0	0	0	0	0	0	0	0	0	0	0	0	0	0	0	1	12.2222	0
1142	0	0	33	0	0	0	0	0	0	0	0	0	0	0	0	0	0	0	0	0	0	0	0	1	25.5556	0
1143	0	1	23	0	0	0	0	0	0	0	1	0	0	0	0	0	0	0	0	0	0	0	0	1	14.4444	0
1144	1	0	65	0	0	0	0	0	0	0	0	0	0	0	0	0	0	0	0	0	0	1	1	1	82.7773	1
1145	1	1	28	0	0	0	0	0	0	0	0	1	0	0	0	0	0	0	0	0	0	0	0	1	72.7752	0
1146	0	1	33	1	1	0	0	0	0	0	0	0	0	0	0	0	0	0	0	0	0	1	0	1	46.7793	0
1147	0	1	54	0	0	0	0	0	0	0	0	0	0	0	0	0	0	0	0	0	0	0	0	1	48.8889	0
1148	1	1	31	0	0	0	0	0	0	0	0	0	0	0	0	0	0	0	0	0	0	0	0	1	44.9995	0
1149	0	1	23	0	0	0	0	0	0	0	0	0	0	0	0	0	0	1	0	0	0	0	0	1	14.4444	0
1150	0	1	35	0	0	0	0	0	0	0	1	0	0	0	0	0	0	0	0	0	0	0	0	1	27.7778	0
1151	0	1	27	0	0	0	0	0	0	0	0	0	0	0	0	0	0	0	0	0	0	0	0	1	18.8889	0
1152	0	1	28	1	1	0	1	0	0	0	0	0	0	0	0	0	0	0	0	0	0	0	0	1	55.3767	0
1153	0	1	26	0	0	0	0	0	0	0	0	0	0	0	0	0	0	0	0	0	0	1	0	1	17.7778	0
1154	1	0	57	0	0	1	0	0	0	0	0	1	0	1	0	0	0	0	0	0	0	1	0	1	124.674	1
1155	0	1	25	0	0	0	0	0	0	0	0	0	0	0	0	0	0	0	0	0	0	0	0	1	16.6667	0
1156	0	1	41	0	0	0	0	0	0	0	0	0	1	0	0	0	0	0	0	0	0	0	0	1	34.4444	0
1157	1	0	22	0	0	0	0	0	0	0	1	0	0	0	0	0	0	0	0	0	0	0	0	1	34.9995	0
1158	1	0	34	0	0	0	0	0	0	0	0	0	0	0	0	0	0	0	0	0	0	0	0	1	48.3329	0
1159	0	1	24	0	0	0	0	0	1	0	1	0	0	0	0	0	0	0	0	0	0	0	0	1	15.5556	0
1160	0	1	44	0	0	0	0	0	0	0	0	0	0	0	0	0	0	0	0	0	0	1	0	1	37.7778	0
1161	1	1	33	0	1	0	0	0	0	0	0	0	0	0	0	0	0	0	0	0	0	1	0	1	47.2218	0
1162	0	1	34	1	1	0	1	0	0	0	0	0	1	0	0	0	0	0	0	0	0	0	0	1	62.0433	0
1163	1	0	69	0	0	0	0	0	0	0	0	0	0	0	0	0	0	0	0	0	0	1	1	1	87.2218	1
1164	0	0	54	0	0	0	0	0	0	0	0	0	0	0	0	0	0	0	0	0	0	0	0	1	48.8889	0
1165	0	1	39	0	0	0	1	0	0	0	0	1	0	0	0	0	0	0	0	0	0	1	0	1	77.4841	1
1166	1	1	26	1	0	0	0	0	0	0	0	0	0	0	0	0	0	0	0	0	0	0	0	1	60.6678	0
1167	1	1	35	1	1	0	1	0	0	0	0	1	0	0	0	0	0	0	0	0	0	1	1	1	115.93	1
1168	1	0	63	0	0	0	0	0	0	0	0	0	0	0	0	0	0	0	0	0	0	0	0	1	80.5551	1
1169	1	1	21	0	0	0	0	0	0	0	0	0	0	0	1	0	0	0	0	0	0	0	0	1	33.8884	0
1170	0	1	35	0	0	0	0	0	0	0	0	0	0	0	0	0	0	0	0	0	0	0	0	1	27.7778	0
1171	1	0	56	0	0	0	0	0	0	0	0	0	0	0	0	0	0	0	0	0	0	0	0	1	72.7773	0
1172	1	1	84	0	0	0	0	0	0	0	0	0	0	0	0	0	0	0	0	0	0	1	1	1	103.888	1
1173	0	1	20	1	1	0	1	0	0	0	0	0	0	0	0	0	0	0	0	0	0	0	0	1	46.4878	0
1174	0	0	25	0	0	0	0	0	0	0	0	0	0	0	0	0	0	0	0	0	0	0	0	1	16.6667	0
1175	0	0	65	0	0	1	0	0	0	0	0	0	0	0	0	0	0	0	0	0	0	0	0	1	61.1111	0
1176	0	1	41	0	0	0	0	0	0	0	0	0	0	0	0	0	0	0	0	0	0	0	0	1	34.4444	0
1177	1	1	22	1	1	0	1	0	1	0	1	0	0	0	0	0	0	0	1	0	0	1	1	1	107.317	1
1178	0	1	25	0	0	0	0	0	0	0	1	0	0	0	1	0	0	0	0	0	0	0	0	1	16.6667	0
1179	0	1	40	0	0	0	0	0	0	0	0	0	0	0	0	0	0	0	0	0	0	0	0	1	33.3333	0
1180	0	1	33	0	0	0	0	0	0	0	0	0	0	0	0	0	0	0	0	0	0	1	0	1	25.5556	0
1181	0	1	31	0	0	0	0	0	0	0	1	0	0	0	0	0	0	0	0	0	0	0	0	1	23.3333	0
1182	0	1	22	1	1	0	0	0	0	0	0	0	1	0	0	0	0	0	0	0	0	0	0	1	34.5571	0
1183	1	0	65	0	0	0	0	0	0	0	1	0	0	0	1	0	0	0	0	0	0	1	0	1	82.7773	1
1184	0	1	28	1	1	0	1	0	0	0	0	0	0	0	0	0	0	0	0	0	0	1	0	1	55.3767	0
1185	0	1	26	0	0	1	0	0	0	0	0	0	0	0	0	0	0	0	0	0	0	0	0	1	17.7778	0
1186	1	0	41	0	0	0	0	0	0	0	0	0	0	1	0	0	0	0	0	0	0	1	0	1	75.7869	0
1187	1	0	70	0	0	1	0	0	0	0	0	0	0	1	0	0	0	0	0	0	0	1	1	1	108.009	1
1188	1	1	59	0	0	0	0	0	0	0	0	0	1	0	0	0	0	0	0	0	0	1	0	1	76.1107	1
1189	0	1	23	0	0	0	0	0	0	0	0	0	0	0	0	0	0	0	0	0	0	0	0	1	14.4444	0
1190	0	1	41	0	0	0	0	0	0	0	1	0	0	0	0	0	0	0	0	0	0	0	0	1	34.4444	0
1191	0	1	22	0	0	0	0	0	0	0	1	0	0	0	0	0	0	0	0	0	0	0	0	1	13.3333	0
1192	0	1	40	0	0	0	0	0	0	0	0	0	0	0	0	0	0	0	0	0	0	0	0	1	33.3333	0
1193	0	1	48	0	0	0	0	0	0	1	0	0	0	0	0	0	0	0	0	0	0	1	0	1	103.408	1
1194	1	0	48	0	0	0	0	0	0	0	0	0	0	1	0	0	0	0	0	0	0	1	0	1	83.5647	1
1195	1	1	45	0	0	0	0	0	0	0	0	0	0	0	0	0	0	0	0	0	0	1	0	1	60.5551	0
1196	1	0	61	0	0	0	0	0	0	0	0	0	1	0	0	0	0	0	0	0	0	1	0	1	78.3329	1
1197	0	1	41	0	0	1	0	0	0	0	1	0	0	0	0	0	0	0	0	0	0	0	0	1	34.4444	0
1198	1	1	68	0	0	0	0	0	0	0	0	0	0	0	0	0	0	0	0	0	0	0	0	1	86.1107	1
1199	0	1	35	0	0	0	0	0	0	0	0	0	0	0	0	0	0	0	0	0	0	0	0	1	27.7778	0
1200	1	1	20	0	0	0	1	0	0	0	1	0	0	0	0	0	0	0	0	0	0	1	0	1	46.9302	0
1201	1	1	33	0	0	0	0	0	0	0	0	0	0	0	0	0	0	0	0	0	0	0	0	1	47.2218	0
1202	1	0	22	0	0	0	0	0	0	0	0	0	0	0	0	0	0	0	0	0	0	0	0	1	34.9995	0
1203	0	1	44	0	0	0	0	0	0	0	0	0	0	0	0	0	0	0	0	0	0	1	0	1	37.7778	0
1204	1	1	42	1	1	0	1	0	0	0	0	0	0	1	0	0	0	0	0	0	0	0	0	1	112.275	1
1205	0	1	43	0	0	0	0	0	0	0	0	0	0	0	0	0	0	0	0	0	0	1	0	1	36.6667	0
1206	1	1	65	1	0	0	0	0	0	0	0	0	0	1	0	0	0	0	0	0	0	0	0	1	123.677	1
1207	0	1	48	0	0	0	0	0	0	0	0	0	0	0	0	0	0	0	0	0	0	0	0	1	42.2222	0
1208	0	1	39	0	0	0	0	0	0	0	0	0	0	0	0	0	0	0	0	0	0	0	0	1	32.2222	0
1209	0	1	24	0	0	0	0	0	0	0	0	0	0	0	0	0	0	0	0	0	0	0	0	1	15.5556	0
1210	1	1	61	0	0	0	0	0	0	0	0	0	0	0	0	0	0	0	0	0	0	0	0	1	78.3329	1
1211	0	0	24	1	1	0	0	0	0	0	0	0	0	0	0	0	0	0	0	0	0	0	0	1	36.7793	0
1212	1	0	81	0	0	0	0	0	0	0	0	1	0	1	0	0	0	0	0	0	0	1	0	1	151.34	1
1213	0	1	24	0	0	0	0	1	1	0	1	0	0	0	0	0	0	0	0	0	0	0	0	1	53.7285	0
1214	0	1	31	0	0	0	0	0	0	0	0	0	0	1	0	0	0	0	0	0	0	0	0	1	43.0096	0
1215	1	0	55	0	0	1	0	0	0	0	0	0	0	0	0	0	0	0	0	0	0	0	0	1	71.6662	0
1216	0	1	34	0	0	0	0	0	0	0	0	0	0	0	0	0	0	0	0	0	0	0	0	1	26.6667	0
1217	0	1	26	1	1	0	1	0	0	0	1	0	0	0	0	0	0	0	0	0	0	0	0	1	53.1545	0
1218	0	1	42	0	0	0	0	0	0	0	0	0	0	0	0	0	0	0	0	0	0	0	0	1	35.5556	0
1219	0	1	34	0	0	0	0	0	0	0	0	0	0	0	0	0	0	0	0	0	0	0	0	1	26.6667	0
1220	1	0	49	0	0	0	0	0	0	0	0	0	1	0	0	0	0	0	0	0	0	1	1	1	64.9995	0
1221	1	1	74	0	0	0	1	0	0	0	0	0	0	0	0	0	0	0	0	0	0	0	0	1	106.93	1
1222	1	1	50	1	1	0	1	0	0	0	1	0	0	0	0	0	0	0	0	0	0	1	0	1	101.487	1
1223	1	1	41	1	1	0	1	0	0	0	0	0	0	1	0	0	0	0	0	0	0	1	1	1	111.164	1
1224	1	0	58	1	0	0	0	0	0	0	0	0	0	0	0	0	0	0	0	0	0	0	0	1	96.2233	1
1225	0	1	40	0	0	0	0	0	0	0	0	0	0	0	0	0	0	0	0	0	0	1	0	1	33.3333	0
1226	1	0	70	0	0	0	0	0	0	0	0	0	0	0	0	0	0	0	0	0	0	1	0	1	88.3329	1
1227	0	0	43	0	0	0	0	0	0	0	0	0	0	1	0	0	0	0	0	0	0	1	1	1	56.3429	0
1228	0	1	18	0	0	0	0	0	0	0	0	0	0	1	0	0	0	0	0	0	0	0	0	1	28.5651	0
1229	0	1	32	1	0	0	0	0	0	0	0	0	0	0	0	0	0	0	0	0	0	0	0	1	45.6682	0
1230	1	1	29	0	0	1	0	0	0	0	0	0	0	0	0	0	0	0	0	0	0	0	0	1	42.7773	0
1231	1	1	34	0	0	0	0	0	0	0	0	0	0	0	0	0	0	0	0	0	0	0	0	1	48.3329	0
1232	1	1	61	0	0	1	0	0	0	0	0	0	0	0	0	0	0	0	0	0	0	1	0	1	78.3329	1
1233	0	0	45	0	0	0	0	0	0	0	1	0	0	1	0	0	0	0	0	0	0	1	0	1	58.5651	0
1234	0	0	47	0	0	0	0	0	0	0	0	0	0	1	0	0	0	0	0	0	0	1	0	1	60.7873	0
1235	0	1	28	0	0	1	0	0	0	0	0	0	0	0	0	0	0	0	0	0	0	0	0	1	20	0
1236	1	1	37	0	0	0	0	0	0	0	0	0	0	1	0	0	0	0	0	0	0	1	0	1	71.3424	0
1237	1	1	67	0	0	0	0	0	0	0	0	1	0	0	0	0	0	0	0	0	0	1	1	1	116.109	1
1238	0	1	50	0	0	0	0	0	0	0	1	0	0	0	0	0	0	0	0	0	0	1	0	1	44.4444	0
1239	1	0	64	0	0	0	0	0	0	0	0	0	0	1	0	0	0	0	0	0	0	1	0	1	101.342	1
1240	0	1	37	0	0	0	0	0	0	0	0	0	0	0	0	0	0	0	0	0	0	0	0	1	30	0
1241	0	1	33	0	0	1	0	0	0	0	0	0	0	0	0	0	0	0	0	0	0	0	0	1	25.5556	0
1242	1	1	59	0	0	0	0	1	1	0	0	0	0	0	1	1	0	1	0	0	0	1	1	1	114.284	1
1243	1	1	74	0	0	0	0	0	0	0	0	0	0	0	0	0	0	0	0	0	0	1	0	1	92.7773	1
1244	0	0	30	0	0	0	0	0	0	0	0	0	0	0	0	0	0	0	0	0	0	0	0	1	22.2222	0
1245	1	0	67	0	0	1	0	0	0	0	0	0	0	0	0	0	0	0	0	0	0	1	0	1	84.9995	1
1246	0	0	40	0	0	0	0	0	0	0	0	0	0	1	0	0	0	0	0	0	0	1	0	1	53.0096	0
1247	0	1	32	0	0	0	0	0	0	0	0	0	0	0	0	0	0	0	0	0	0	0	0	1	24.4444	0
1248	0	1	25	0	0	0	0	0	0	0	0	1	0	0	0	0	0	0	0	0	0	0	0	1	47.7757	0
1249	0	1	47	0	0	0	0	0	0	0	0	0	0	0	0	0	0	0	0	0	0	0	0	1	41.1111	0
1250	0	1	41	0	0	0	0	0	0	0	0	0	0	0	0	0	0	0	0	0	0	0	0	1	34.4444	0
1251	0	1	34	1	1	0	1	0	0	0	0	0	0	0	0	0	0	0	0	0	0	0	0	1	62.0433	0
1252	1	0	52	0	0	0	0	0	0	0	0	0	1	0	0	0	0	0	0	0	0	0	0	1	68.3329	0
1253	0	1	47	0	0	0	0	0	0	0	0	0	0	0	0	0	0	0	0	0	0	0	0	1	41.1111	0
1254	0	1	59	1	1	0	1	0	0	0	0	0	0	0	0	0	0	0	0	0	0	0	0	1	89.8211	1
1255	0	1	35	1	0	0	0	0	0	0	0	0	0	0	0	0	0	0	0	0	0	0	0	1	49.0016	0
1256	1	1	44	1	1	0	1	0	0	0	0	0	0	1	0	0	0	0	0	0	0	0	0	1	114.497	1
1257	0	1	27	0	0	0	0	0	0	0	0	0	0	0	0	0	0	0	0	0	0	0	0	1	18.8889	0
1258	1	1	53	0	0	0	0	0	0	0	0	0	0	0	0	0	0	0	0	0	0	0	0	1	69.444	0
1259	0	1	19	1	1	0	0	0	0	0	0	0	0	0	0	0	0	0	0	0	0	0	0	1	31.2238	0
1260	1	1	75	0	0	0	0	0	0	0	0	0	0	1	0	0	0	0	0	0	0	0	0	1	113.565	1
1261	0	1	22	1	1	0	0	0	0	0	0	0	0	0	0	0	0	0	0	0	0	0	0	1	34.5571	0
1262	1	1	21	1	1	0	1	0	0	0	0	0	0	0	0	0	0	0	0	0	0	0	0	1	69.2651	0
1263	0	0	41	0	0	0	0	0	0	0	0	0	0	0	0	0	0	0	0	0	0	0	0	1	34.4444	0
1264	0	1	41	0	1	0	0	0	0	0	0	0	0	1	0	0	0	0	0	0	0	1	0	1	54.1207	0
1265	1	1	55	0	0	1	0	0	0	0	0	0	0	0	0	0	0	0	0	0	0	1	0	1	71.6662	0
1266	1	0	50	0	0	0	0	0	0	0	0	0	0	0	0	0	0	0	0	0	0	1	0	1	66.1107	0
1267	0	1	28	0	0	0	0	0	0	0	0	0	0	0	0	0	0	0	0	0	0	0	0	1	20	0
1268	1	0	48	0	0	0	0	0	0	0	0	0	0	0	0	0	0	0	0	0	0	0	0	1	63.8884	0
1269	1	0	52	0	0	0	0	0	0	0	0	0	0	1	0	0	0	0	0	0	0	0	0	1	88.0091	1
1270	1	0	74	0	0	1	0	0	0	0	0	0	1	0	0	0	0	0	0	0	0	1	1	1	92.7773	1
1271	0	1	31	0	0	0	0	0	0	0	0	0	0	0	0	0	0	0	0	0	0	0	0	1	23.3333	0
1272	0	0	49	0	0	0	0	0	0	0	0	0	0	0	0	0	0	0	0	0	0	1	0	1	43.3333	0
1273	1	1	78	0	0	0	0	0	0	0	0	0	0	0	0	0	0	0	0	0	0	1	0	1	97.2218	1
1274	0	0	42	0	0	0	0	0	0	0	0	0	1	0	0	0	0	0	0	0	0	0	0	1	35.5556	0
1275	0	1	25	0	0	1	0	0	0	0	0	0	0	0	0	0	0	0	0	0	0	0	0	1	16.6667	0
1276	0	1	33	0	0	1	0	0	0	0	0	0	1	0	0	0	0	0	0	0	0	0	0	1	25.5556	0
1277	0	1	37	0	0	0	0	0	0	0	0	0	0	0	0	0	0	0	0	0	0	0	0	1	30	0
1278	1	1	60	0	0	0	0	0	0	0	0	0	0	0	0	0	0	0	0	0	0	1	0	1	77.2218	1
1279	1	0	33	0	0	1	0	0	0	0	0	0	0	0	0	0	0	0	0	0	0	0	0	1	47.2218	0
1280	1	1	69	0	1	0	1	0	0	0	0	0	0	0	0	0	0	0	0	0	0	1	0	1	101.375	1
1281	1	1	56	0	0	0	0	0	0	0	0	0	0	0	0	0	0	0	0	0	0	0	0	1	72.7773	0
1282	0	1	22	0	0	0	0	0	0	0	0	0	0	0	0	0	0	0	0	0	0	0	0	1	13.3333	0
1283	1	1	75	0	0	0	0	0	0	0	0	0	0	0	0	0	0	1	0	0	0	1	0	1	93.8884	1
1284	0	1	26	1	0	0	0	0	0	0	0	0	0	0	0	0	0	0	0	0	0	0	0	1	39.0016	0
1285	1	1	69	0	0	0	0	0	0	0	0	0	0	0	0	0	0	0	0	0	0	1	0	1	87.2218	1
1286	0	1	28	1	1	0	1	0	1	0	0	0	0	0	0	0	0	0	0	0	0	0	0	1	55.3767	0
1287	0	0	74	0	0	1	0	0	0	0	0	0	0	0	0	0	0	0	0	0	0	1	0	1	71.1111	0
1288	0	1	56	0	0	0	0	0	0	0	0	0	0	0	0	0	0	0	0	0	0	1	0	1	51.1111	0
1289	0	1	23	0	0	0	0	0	0	0	1	0	0	0	0	0	0	0	0	0	0	0	0	1	14.4444	0
1290	1	0	32	0	0	0	0	0	0	0	0	0	0	0	0	0	0	0	0	0	0	0	0	1	46.1107	0
1291	1	1	58	0	0	0	0	0	0	0	0	0	0	0	1	0	0	0	0	0	0	1	0	1	74.9995	0
1292	1	1	78	0	0	0	0	0	0	0	0	0	0	0	0	0	0	0	0	0	0	0	0	1	97.2218	1
1293	1	0	40	0	0	1	0	0	0	0	0	0	1	0	0	0	0	0	0	0	0	1	0	1	54.9995	0
1294	0	0	21	1	1	0	1	0	0	0	0	0	0	0	0	0	0	0	0	0	0	1	0	1	47.5989	0
1295	1	1	43	0	0	1	0	0	0	0	0	0	0	0	0	0	0	0	0	0	1	1	0	1	58.3329	0
1296	1	0	71	0	0	1	0	0	0	0	0	0	0	0	0	0	0	0	0	0	0	0	0	1	89.444	1
1297	0	0	22	1	1	0	1	0	0	0	0	0	0	0	0	0	0	0	0	0	0	1	0	1	48.71	0
1298	0	0	36	0	0	0	0	0	0	0	0	0	0	0	0	0	0	0	0	0	0	0	0	1	28.8889	0
1299	0	0	53	0	0	0	0	0	0	0	0	0	0	0	0	0	0	0	0	0	0	1	0	1	47.7778	0
1300	1	0	90	0	0	0	0	0	0	1	0	0	0	0	1	0	0	0	0	0	0	1	1	1	171.741	1
1301	0	0	29	0	0	0	0	0	0	0	0	0	0	0	0	0	0	0	0	0	0	1	0	1	21.1111	0
1302	1	1	58	0	0	0	0	0	0	0	0	0	0	1	0	0	0	0	1	0	0	1	0	1	131.616	1
1303	0	1	21	1	0	0	0	0	0	0	0	0	0	0	1	0	0	0	0	0	0	0	0	1	33.446	0
1304	0	1	34	0	0	0	0	0	0	0	0	0	0	1	0	0	0	0	0	0	0	0	0	1	46.3429	0
1305	0	1	33	0	0	0	0	0	1	0	0	0	0	0	0	0	0	0	0	0	0	1	0	1	25.5556	0
1306	1	1	63	0	0	0	0	0	0	0	0	0	0	0	0	0	0	0	0	0	0	0	0	1	80.5551	1
1307	0	1	39	0	1	0	0	0	0	0	0	0	0	0	0	0	0	0	0	0	0	0	0	1	32.2222	0
1308	1	0	77	0	0	0	0	0	0	0	0	0	0	1	0	0	0	0	0	0	0	1	1	1	115.787	1
1309	0	1	34	0	0	0	0	0	0	0	0	0	0	0	0	0	0	0	0	0	0	0	0	1	26.6667	0
1310	1	1	52	0	0	0	0	0	0	1	0	0	0	1	0	0	0	0	0	0	0	1	1	1	149.195	1
1311	0	1	37	0	0	0	0	0	0	0	1	0	0	0	0	0	0	0	0	0	0	0	0	1	30	0
1312	1	0	48	0	0	0	0	0	0	0	0	0	0	1	0	0	0	0	0	0	0	1	0	1	83.5647	1
1313	1	0	75	0	0	0	0	0	0	0	0	0	0	1	0	0	0	0	0	0	0	1	0	1	113.565	1
1314	1	0	55	0	0	0	0	0	0	0	0	0	0	0	0	0	0	0	0	0	0	1	0	1	71.6662	0
1315	1	0	64	0	0	0	0	0	0	0	0	0	0	0	0	0	0	0	1	0	0	0	0	1	118.607	1
1316	1	0	74	0	0	0	0	0	0	0	0	1	0	0	0	0	0	0	0	0	0	0	0	1	123.886	1
1317	0	1	25	0	0	0	0	0	0	0	0	0	0	0	0	0	0	0	0	0	0	0	0	1	16.6667	0
1318	1	0	33	0	0	1	0	1	1	0	1	0	0	0	0	0	0	0	0	0	0	1	1	1	85.3947	1
1319	0	1	40	0	0	0	0	0	0	0	0	0	0	0	0	0	0	0	0	0	0	1	0	1	33.3333	0
1320	1	0	63	1	0	0	0	0	0	0	0	1	0	1	0	0	0	0	1	0	0	1	1	1	189.505	1
1321	0	1	22	0	0	0	0	0	0	0	0	0	0	0	0	0	0	0	0	0	0	0	0	1	13.3333	0
1322	0	1	34	0	0	0	0	0	0	0	0	0	0	0	0	0	0	0	0	0	0	0	0	1	26.6667	0
1323	0	1	34	0	0	0	0	0	0	0	0	0	0	0	0	0	0	0	0	0	0	0	0	1	26.6667	0
1324	0	1	25	0	0	0	0	0	0	0	0	0	0	0	0	0	0	0	0	0	0	0	0	1	16.6667	0
1325	0	1	29	0	0	0	0	0	0	0	0	0	0	0	0	0	0	0	0	0	0	0	0	1	21.1111	0
1326	0	1	33	0	0	0	0	0	0	0	0	0	0	0	0	0	0	0	0	0	0	0	0	1	25.5556	0
1327	1	1	64	0	0	0	0	0	0	0	0	0	0	0	1	0	0	0	0	0	0	1	0	1	81.6662	1
1328	1	0	45	1	0	0	1	0	0	0	0	0	0	0	0	0	0	0	1	0	0	1	1	1	132.872	1
1329	0	0	68	0	0	0	0	0	0	0	0	0	0	0	0	0	0	0	0	0	0	1	0	1	64.4444	0
1330	0	0	54	0	0	0	0	0	0	0	0	0	0	0	0	0	0	0	0	0	0	1	0	1	48.8889	0
1331	0	1	26	0	0	0	0	0	0	0	0	0	0	0	0	0	0	0	0	1	0	0	0	1	17.7778	0
1332	0	1	21	0	0	0	0	0	0	0	0	1	0	0	0	0	0	0	1	0	0	0	0	1	80.2717	1
1333	0	1	24	0	0	0	0	0	0	0	0	0	0	0	0	0	0	0	0	0	0	0	0	1	15.5556	0
1334	1	1	68	0	0	0	0	0	0	0	0	0	0	0	0	0	0	0	0	0	0	0	0	1	86.1107	1
1335	1	1	38	0	0	0	0	0	0	0	0	0	0	0	0	0	0	0	0	0	0	0	0	1	52.7773	0
1336	0	0	29	0	0	1	1	0	0	0	0	0	0	0	1	0	0	0	0	0	0	0	0	1	35.264	0
1337	0	1	22	0	0	0	0	0	0	0	0	0	0	0	0	0	0	0	0	0	0	0	0	1	13.3333	0
1338	0	1	49	0	0	0	0	0	0	0	0	0	0	0	0	0	0	0	0	0	0	1	0	1	43.3333	0
1339	0	0	41	0	0	0	0	0	0	0	0	0	0	1	0	0	0	0	0	0	0	0	0	1	54.1207	0
1340	0	1	48	0	0	0	0	0	0	0	0	0	0	0	0	0	0	0	0	0	0	0	0	1	42.2222	0
1341	0	1	30	0	0	0	0	0	0	0	1	0	0	0	0	0	0	0	0	0	0	0	0	1	22.2222	0
1342	0	1	23	0	0	0	0	0	0	0	0	0	1	0	1	0	0	0	0	0	0	0	0	1	14.4444	0
1343	1	1	54	1	1	0	1	0	1	0	0	1	0	0	0	0	0	0	0	0	0	0	0	1	137.041	1
1344	1	1	64	0	0	0	0	0	0	0	0	0	0	0	0	0	0	0	0	0	0	0	0	1	81.6662	1
1345	1	0	22	0	0	0	0	0	0	0	0	0	0	0	0	0	0	0	0	0	0	1	0	1	34.9995	0
1346	1	1	69	0	0	0	0	0	0	0	0	0	1	1	0	0	0	0	0	0	0	1	0	1	106.898	1
1347	1	0	62	1	0	0	0	0	0	0	0	0	0	1	0	1	0	0	0	0	0	1	1	1	120.344	1
1348	0	1	20	1	0	0	0	0	0	0	0	0	0	0	0	0	0	0	0	0	0	0	0	1	32.3349	0
1349	1	1	78	0	0	1	0	0	0	0	0	0	0	0	0	0	0	0	0	0	1	1	0	1	97.2218	1
1350	0	0	22	0	0	1	0	0	0	0	0	1	0	0	0	0	0	0	0	0	0	0	0	1	44.4424	0
1351	0	1	59	0	0	0	0	0	0	0	0	1	0	0	0	0	0	0	0	0	0	1	0	1	85.5535	1
1352	0	1	25	0	0	0	0	0	0	0	0	0	0	0	0	0	0	0	0	0	0	0	0	1	16.6667	0
1353	1	1	55	0	0	0	0	0	0	0	0	0	0	0	0	0	0	0	0	0	0	1	0	1	71.6662	0
1354	1	1	68	0	0	1	0	0	0	0	0	0	0	1	0	0	0	0	0	0	0	0	0	1	105.787	1
1355	1	0	59	0	0	1	0	0	0	0	0	0	0	0	0	0	0	0	0	0	0	0	0	1	76.1107	1
1356	1	1	32	0	0	1	0	0	0	0	0	0	0	0	0	0	0	0	0	0	0	0	0	1	46.1107	0
1357	0	1	27	1	1	0	1	0	0	0	0	0	0	0	0	0	0	0	0	0	0	0	0	1	54.2656	0
1358	0	1	23	0	0	0	1	0	0	0	0	0	0	0	0	0	0	0	0	0	0	0	0	1	28.5973	0
1359	0	1	29	1	0	0	0	0	0	0	1	0	0	0	0	0	0	0	0	0	0	0	0	1	42.3349	0
1360	0	1	35	0	0	0	0	0	0	0	0	0	0	0	0	0	0	0	0	0	0	0	0	1	27.7778	0
1361	0	1	39	0	0	0	0	0	0	0	0	0	0	0	0	0	0	0	0	0	0	0	0	1	32.2222	0
1362	1	1	39	0	0	0	0	0	0	0	0	0	0	0	0	0	0	0	0	0	0	1	0	1	53.8884	0
1363	1	1	54	0	0	0	1	0	0	0	0	0	0	1	0	0	0	0	0	0	0	1	0	1	104.384	1
1364	0	1	25	1	1	0	1	0	0	0	1	0	0	0	0	0	0	0	0	0	0	0	0	1	52.0433	0
1365	0	1	54	0	0	0	1	1	1	0	0	0	0	0	0	0	0	0	0	0	0	1	0	1	101.215	1
1366	1	1	68	0	0	0	0	0	0	0	0	0	0	0	0	0	0	0	0	0	0	0	0	1	86.1107	1
1367	0	1	40	0	0	0	0	0	0	0	0	0	0	0	0	0	0	0	0	0	0	0	0	1	33.3333	0
1368	0	0	37	0	0	0	0	0	0	0	0	0	0	0	0	0	0	0	0	0	0	0	0	1	30	0
1369	0	1	29	0	0	0	0	0	1	0	1	0	0	0	0	0	0	0	0	0	0	0	0	1	21.1111	0
1370	0	0	44	1	1	0	1	0	0	0	0	1	0	1	0	0	0	0	0	0	0	1	0	1	123.94	1
1371	1	1	61	0	0	0	0	0	0	0	0	1	0	0	0	0	0	0	0	0	0	1	1	1	109.442	1
1372	0	1	23	0	1	0	0	0	0	0	1	0	0	0	0	0	0	0	0	0	0	0	0	1	14.4444	0
1373	0	1	34	0	0	1	0	0	0	0	0	0	0	0	0	0	0	0	0	0	0	0	0	1	26.6667	0
1374	0	1	29	0	0	0	0	0	0	0	0	0	0	0	0	0	0	0	0	0	0	0	0	1	21.1111	0
1375	0	1	44	0	0	0	0	0	0	0	0	0	0	0	0	0	0	0	0	0	0	1	0	1	37.7778	0
1376	0	1	36	0	0	1	0	0	0	0	0	0	0	0	0	0	0	0	0	0	0	0	0	1	28.8889	0
1377	1	0	45	0	0	0	0	0	0	0	0	0	1	0	0	0	0	0	0	0	0	0	0	1	60.5551	0
1378	1	1	52	0	0	0	0	0	0	0	0	0	1	0	0	0	0	0	0	0	0	1	0	1	68.3329	0
1379	0	1	52	1	1	0	1	0	0	0	0	0	0	0	0	0	0	0	1	0	0	1	1	1	118.984	1
1380	1	1	28	0	0	1	0	0	0	0	0	1	0	1	0	0	0	0	0	0	0	0	0	1	92.4515	1
1381	0	1	54	0	0	0	0	0	0	0	0	0	0	1	0	0	0	0	0	1	0	1	1	1	68.5651	0
1382	0	1	32	0	1	0	0	0	0	0	0	0	0	0	0	0	0	0	0	0	0	0	0	1	24.4444	0
1383	0	1	48	0	0	0	0	0	0	0	0	0	0	1	0	0	0	0	0	0	0	0	0	1	61.8984	0
1384	1	1	52	0	0	0	0	0	0	0	0	0	0	0	0	0	0	0	0	0	0	0	0	1	68.3329	0
1385	0	1	30	0	0	0	0	0	0	0	0	0	0	0	0	0	0	0	0	0	0	0	0	1	22.2222	0
1386	0	1	19	0	0	0	0	0	0	0	1	0	0	0	0	0	1	0	0	0	0	0	0	1	10	0
1387	0	1	20	0	0	0	0	0	0	0	1	0	0	0	0	0	0	0	0	0	0	0	0	1	11.1111	0
1388	1	0	41	0	0	0	0	0	0	0	0	0	0	0	0	0	0	0	1	0	0	0	0	1	93.0512	1
1389	1	1	77	0	0	0	0	0	0	0	0	0	1	1	0	0	0	0	0	0	0	1	1	1	115.787	1
1390	1	0	61	0	0	0	0	0	0	0	0	1	0	0	0	0	0	0	0	0	0	1	1	1	109.442	1
1391	1	0	52	0	0	1	0	0	0	0	0	0	0	0	0	0	0	0	0	0	0	1	0	1	68.3329	0
1392	0	1	48	0	0	1	0	0	0	0	0	0	0	0	0	0	0	0	0	0	0	0	0	1	42.2222	0
1393	0	1	32	1	0	0	0	0	0	0	0	0	0	0	0	0	0	0	0	0	0	0	0	1	45.6682	0
1394	1	0	24	0	0	1	0	0	0	0	0	0	0	0	0	0	0	0	0	0	0	0	0	1	37.2218	0
1395	1	1	26	0	0	1	0	0	0	0	0	0	0	0	0	0	0	0	0	0	0	1	0	1	39.444	0
1396	0	0	47	0	0	0	0	0	0	0	0	0	0	0	0	0	0	0	0	0	0	0	0	1	41.1111	0
1397	1	1	67	0	0	0	0	0	0	0	0	0	1	0	1	0	0	0	0	0	0	1	0	1	84.9995	1
1398	1	0	70	0	0	0	0	0	0	0	0	0	0	1	0	0	0	0	0	0	0	0	0	1	108.009	1
1399	1	1	31	0	0	1	1	0	0	0	0	0	0	0	0	0	0	0	0	0	0	1	0	1	59.1524	0
1400	1	1	30	1	0	0	0	0	0	0	0	0	0	0	0	0	0	0	0	0	0	0	0	1	65.1122	0
1401	0	1	47	1	1	0	1	0	0	0	0	0	0	1	0	0	0	0	0	0	0	1	0	1	96.164	1
1402	0	1	38	0	0	0	0	0	0	0	0	0	0	0	0	0	0	0	0	0	0	0	0	1	31.1111	0
1403	1	0	60	0	0	1	0	0	0	0	0	0	0	0	0	0	0	0	0	0	0	0	0	1	77.2218	1
1404	0	1	26	1	0	0	0	0	0	0	0	0	0	0	0	0	0	0	0	0	0	0	0	1	39.0016	0
1405	1	1	69	1	0	0	0	0	0	0	0	0	0	0	0	0	0	0	0	0	0	0	0	1	108.446	1
1406	1	1	20	1	1	0	0	0	0	0	1	0	0	0	0	0	0	0	0	0	0	0	0	1	54.0011	0
1407	1	1	74	0	0	0	0	0	0	0	0	1	0	0	0	0	0	0	0	0	0	0	0	1	123.886	1
1408	0	1	25	0	0	0	0	0	0	0	0	0	0	0	0	0	0	0	0	0	0	0	0	1	16.6667	0
1409	1	1	56	0	0	0	0	0	1	0	0	0	0	0	1	0	0	0	0	0	0	1	1	1	72.7773	0
1410	1	1	19	1	1	0	1	0	0	0	0	0	0	0	0	0	0	0	0	0	0	0	0	1	67.0429	0
1411	0	1	28	1	0	0	0	0	0	0	0	0	0	0	0	0	0	0	0	0	0	0	0	1	41.2238	0
1412	1	1	42	0	0	0	0	0	0	0	0	0	0	0	0	0	0	0	0	0	0	0	0	1	57.2218	0
1413	0	1	29	1	0	0	0	0	0	0	1	0	0	0	0	0	0	0	0	0	0	1	0	1	42.3349	0
1414	0	1	45	0	0	0	0	0	0	0	0	0	0	0	0	0	0	0	0	0	0	1	0	1	38.8889	0
1415	0	1	23	1	1	0	1	0	0	0	0	0	0	0	0	0	0	0	0	0	0	1	0	1	49.8211	0
1416	0	1	39	0	0	0	0	0	0	0	0	0	0	0	0	0	0	0	0	0	0	0	0	1	32.2222	0
1417	1	1	61	0	0	0	0	0	0	1	0	0	0	0	0	0	0	0	0	0	0	1	1	1	139.519	1
1418	0	1	31	0	0	0	0	0	0	0	0	0	1	0	0	0	0	0	0	0	0	0	0	1	23.3333	0
1419	1	0	33	0	0	0	0	0	0	0	0	0	0	0	0	0	0	0	0	0	0	0	0	1	47.2218	0
1420	1	0	46	0	0	1	0	0	0	0	0	0	0	0	0	0	0	0	0	0	0	1	0	1	61.6662	0
1421	0	1	30	1	0	0	0	0	0	0	0	0	0	0	0	0	0	0	0	0	0	0	0	1	43.446	0
1422	1	1	40	0	0	0	0	0	0	0	0	0	0	0	0	0	0	0	0	0	0	0	0	1	54.9995	0
1423	1	1	37	0	0	1	0	0	0	0	0	0	0	0	0	0	0	0	0	0	0	1	0	1	51.6662	0
1424	0	1	26	0	0	0	0	0	0	0	0	0	0	0	0	0	0	0	0	0	0	0	0	1	17.7778	0
1425	1	0	28	0	0	1	0	0	0	0	0	0	0	1	0	0	0	0	0	0	0	0	0	1	61.3424	0
1426	0	1	33	0	0	1	0	0	0	0	0	0	0	0	0	0	0	0	0	0	0	0	0	1	25.5556	0
1427	0	1	31	0	0	0	0	0	0	0	0	0	0	0	0	0	0	0	0	0	0	0	0	1	23.3333	0
1428	1	1	75	0	0	1	0	0	0	0	0	0	0	0	0	0	0	0	0	0	0	1	0	1	93.8884	1
1429	0	1	45	0	0	0	0	0	0	0	0	0	0	0	0	0	0	0	0	0	0	0	0	1	38.8889	0
1430	1	1	41	0	0	0	0	0	0	0	1	0	0	0	0	0	0	0	0	0	0	0	0	1	56.1107	0
1431	0	1	44	0	0	0	0	0	0	0	0	0	0	0	0	0	0	0	0	0	0	0	0	1	37.7778	0
1432	0	0	22	0	0	0	0	0	0	0	0	1	0	0	0	0	0	0	0	0	0	0	0	1	44.4424	0
1433	0	1	35	0	0	1	0	0	0	0	0	0	0	0	1	0	0	0	0	0	0	1	0	1	27.7778	0
1434	1	0	43	0	0	1	0	0	0	0	0	0	0	0	0	0	0	0	0	0	0	0	0	1	58.3329	0
1435	0	1	26	0	0	0	0	0	0	0	0	0	0	1	0	0	0	0	0	0	0	0	0	1	37.454	0
1436	0	1	24	0	0	0	0	0	0	0	0	0	1	0	0	0	0	0	0	0	0	1	1	1	15.5556	0
1437	0	1	20	0	0	0	0	0	0	0	0	0	0	0	0	0	0	0	0	0	0	0	0	1	11.1111	0
1438	0	1	28	0	0	0	0	0	0	0	0	0	0	0	0	0	0	0	0	0	0	0	0	1	20	0
1439	1	1	79	0	0	0	0	0	0	0	0	0	0	1	0	0	0	0	0	0	1	1	0	1	118.009	1
1440	0	1	40	0	0	0	0	0	0	0	0	0	0	0	0	0	0	0	0	0	0	0	0	1	33.3333	0
1441	0	1	48	0	0	0	0	0	0	0	0	0	0	0	0	0	0	0	0	0	0	1	1	1	42.2222	0
1442	0	1	27	0	0	0	0	0	0	0	0	0	0	0	0	0	0	0	0	0	0	0	0	1	18.8889	0
1443	0	1	35	0	0	0	0	0	0	0	0	0	0	0	0	0	0	0	0	0	0	0	0	1	27.7778	0
1444	0	1	46	0	0	1	0	0	0	0	0	0	0	1	0	0	0	0	0	0	0	0	0	1	59.6762	0
1445	1	0	66	0	0	0	0	0	0	0	1	0	0	0	0	0	0	0	0	0	0	1	0	1	83.8884	1
1446	1	0	47	1	1	0	1	0	0	0	0	0	0	1	0	0	0	0	0	0	0	1	1	1	117.83	1
1447	0	1	26	1	0	0	0	0	0	0	0	0	0	0	0	0	0	0	0	0	0	0	0	1	39.0016	0
1448	0	1	24	0	0	0	0	0	0	0	0	0	0	0	0	0	0	0	0	0	0	0	0	1	15.5556	0
1449	1	0	72	1	0	0	0	0	0	0	0	0	0	0	0	0	0	0	0	0	0	1	0	1	111.779	1
1450	1	1	20	1	1	0	1	0	0	0	0	0	1	0	0	0	0	0	0	0	0	0	0	1	68.154	0
1451	0	1	21	0	0	0	0	0	0	0	0	0	0	0	0	0	0	0	0	0	0	0	0	1	12.2222	0
1452	0	1	64	0	0	0	0	0	0	0	0	0	0	1	0	0	0	0	0	0	0	0	0	1	79.6762	1
1453	0	1	30	0	0	0	0	0	0	0	0	0	0	0	0	0	0	0	0	0	0	1	1	1	22.2222	0
1454	1	1	68	0	0	0	0	0	0	0	0	0	0	0	0	0	0	0	0	0	0	1	0	1	86.1107	1
1455	0	0	26	1	1	0	1	0	0	0	0	1	0	0	0	0	0	0	0	0	0	0	0	1	84.2635	1
1456	1	1	39	0	0	0	0	0	0	0	0	0	0	0	0	0	0	0	0	0	0	0	0	1	53.8884	0
1457	0	1	33	0	0	0	0	0	0	0	0	0	0	0	0	0	0	0	0	0	0	1	0	1	25.5556	0
1458	1	1	51	0	0	0	0	0	0	0	0	0	0	0	0	0	0	0	0	0	0	1	0	1	67.2218	0
1459	1	0	65	0	0	0	0	0	0	0	0	0	0	0	0	0	0	0	0	0	0	0	0	1	82.7773	1
1460	0	1	36	0	0	0	0	0	0	0	0	0	0	0	0	0	0	0	0	0	0	0	0	1	28.8889	0
1461	1	0	46	0	0	1	0	0	0	0	0	1	0	0	0	0	0	0	0	0	0	1	0	1	92.7752	1
1462	1	0	77	0	0	0	0	0	0	0	0	0	0	1	0	1	0	0	0	0	0	1	0	1	115.787	1
1463	0	1	28	0	0	0	0	0	0	0	0	0	0	0	0	0	0	0	0	0	0	0	0	1	20	0
1464	0	1	47	1	0	0	0	0	0	0	0	0	0	0	0	0	0	0	0	0	0	1	0	1	62.3349	0
1465	0	1	34	0	0	0	0	0	0	0	0	0	0	0	0	0	0	0	0	0	0	0	0	1	26.6667	0
1466	0	1	31	0	0	0	0	0	0	0	0	0	0	0	0	0	0	0	0	0	0	0	0	1	23.3333	0
1467	1	1	26	1	0	0	0	0	0	0	0	0	0	1	0	0	0	0	0	0	0	0	0	1	80.344	1
1468	1	1	52	0	0	0	0	0	0	0	0	0	0	0	0	0	0	0	0	0	0	1	1	1	68.3329	0
1469	1	1	57	0	0	0	0	0	0	0	0	1	0	0	0	0	0	0	0	0	0	0	0	1	104.997	1
1470	1	0	53	0	0	0	0	0	0	0	0	0	0	0	0	0	0	0	0	0	0	0	0	1	69.444	0
1471	0	1	21	0	0	1	0	0	0	0	0	0	1	0	0	0	0	0	0	0	0	0	0	1	12.2222	0
1472	0	0	45	0	0	0	0	0	0	0	0	0	0	1	0	0	0	0	0	0	0	1	0	1	58.5651	0
1473	0	1	34	0	0	0	0	0	0	0	1	0	0	0	0	0	0	0	0	0	0	0	0	1	26.6667	0
1474	0	1	29	0	0	0	0	0	0	0	0	0	0	0	0	0	0	0	0	0	0	0	0	1	21.1111	0
1475	1	1	63	0	0	0	0	0	0	0	0	0	0	0	0	0	0	0	0	0	0	1	0	1	80.5551	1
1476	0	0	28	0	0	0	0	0	0	0	0	0	0	0	0	0	0	0	0	0	0	0	0	1	20	0
1477	1	1	55	0	0	0	0	0	0	0	0	0	0	0	0	0	0	0	0	0	0	0	0	1	71.6662	0
1478	0	1	40	0	0	0	0	0	0	0	0	0	0	0	0	0	0	0	0	0	0	0	0	1	33.3333	0
1479	0	1	27	0	0	0	0	0	0	0	1	0	0	0	1	0	0	0	0	0	0	0	0	1	18.8889	0
1480	0	1	41	0	0	0	0	0	0	0	0	0	0	0	0	0	0	0	0	0	0	0	0	1	34.4444	0
1481	0	1	44	0	0	0	0	0	0	0	0	0	0	0	0	0	0	0	0	0	0	0	0	1	37.7778	0
1482	0	1	34	1	1	0	1	0	0	0	0	0	0	0	0	0	0	0	0	0	0	0	0	1	62.0433	0
1483	1	0	64	0	0	0	0	0	0	1	0	0	0	1	0	0	0	0	0	0	0	1	1	1	162.528	1
1484	0	1	44	0	0	0	0	0	0	0	0	0	0	0	0	0	0	0	0	0	0	0	0	1	37.7778	0
1485	0	1	26	1	0	0	0	0	1	0	0	0	0	0	0	0	0	0	0	0	0	1	0	1	39.0016	0
1486	1	0	54	0	0	0	0	0	0	0	0	0	0	0	0	0	0	0	0	0	0	1	1	1	70.5551	0
1487	0	1	24	0	0	0	0	0	0	0	0	0	0	0	0	0	0	0	1	0	0	0	0	1	52.496	0
1488	0	1	35	0	0	0	0	0	0	0	0	0	0	0	0	0	0	0	0	0	0	0	0	1	27.7778	0
1489	1	1	38	0	0	0	0	0	0	0	0	0	0	0	0	0	0	1	0	0	0	1	0	1	52.7773	0
1490	0	1	26	0	0	0	0	0	0	0	0	0	0	0	0	0	0	0	0	0	0	0	0	1	17.7778	0
1491	0	1	45	0	0	0	0	0	0	0	0	0	0	0	0	0	0	0	0	0	0	1	0	1	38.8889	0
1492	0	1	20	0	0	0	0	0	0	0	0	0	0	0	0	0	0	0	0	0	0	0	0	1	11.1111	0
1493	0	0	22	1	0	0	0	0	0	0	0	0	1	0	0	0	0	0	0	0	0	1	0	1	34.5571	0
1494	0	1	53	0	0	0	0	0	0	0	0	0	0	0	0	0	0	0	0	0	0	0	0	1	47.7778	0
1495	0	0	52	0	0	0	0	0	0	0	0	0	0	1	0	0	0	0	0	0	0	0	0	1	66.3429	0
1496	0	1	37	0	0	1	1	0	0	0	0	0	0	1	0	0	0	0	0	0	0	0	0	1	63.8291	0
1497	1	1	20	1	1	0	1	0	1	0	0	0	0	0	0	0	0	0	0	0	0	0	0	1	68.154	0
1498	0	1	35	1	1	0	1	0	0	0	0	0	0	0	0	0	0	0	0	0	0	1	0	1	63.1545	0
1499	0	1	46	0	0	0	0	0	0	0	0	0	0	0	0	0	0	0	0	0	0	0	0	1	40	0
1500	1	1	77	0	0	0	0	0	0	0	0	0	0	0	0	0	0	0	0	0	0	0	0	1	96.1107	1
1501	0	1	32	0	0	1	0	0	0	0	0	0	0	0	0	0	0	0	0	0	0	1	0	1	24.4444	0
1502	0	1	54	0	0	1	0	0	1	0	0	0	0	0	0	0	0	0	0	0	0	0	0	1	48.8889	0
1503	0	1	33	0	0	0	0	0	0	0	0	0	0	0	0	0	0	0	0	0	0	1	0	1	25.5556	0
1504	0	1	19	0	0	0	0	0	0	0	0	0	0	0	0	0	0	0	0	0	0	0	0	1	10	0
1505	0	0	46	0	0	0	0	0	0	0	0	0	0	1	0	0	0	0	0	0	0	1	0	1	59.6762	0
1506	0	1	39	0	0	0	0	0	0	0	0	0	0	0	0	0	0	0	0	0	0	0	0	1	32.2222	0
1507	0	1	41	0	0	0	0	0	0	0	0	0	0	0	0	0	0	0	0	0	0	0	0	1	34.4444	0
1508	0	1	40	0	0	0	0	0	0	0	0	0	0	0	0	0	0	0	0	0	0	0	0	1	33.3333	0
1509	0	1	54	0	0	0	0	0	0	0	0	0	0	0	0	0	0	0	0	0	0	0	0	1	48.8889	0
1510	0	1	48	0	0	0	0	0	0	0	0	0	0	0	0	0	0	0	0	0	0	0	0	1	42.2222	0
1511	0	1	32	0	0	0	0	0	0	0	1	0	0	1	0	0	0	0	0	0	0	0	0	1	44.1207	0
1512	0	0	47	0	0	0	0	0	0	0	0	0	1	1	0	0	0	0	0	0	0	0	0	1	60.7873	0
1513	1	0	50	0	0	1	0	0	0	0	0	0	0	0	0	0	0	0	0	0	0	1	0	1	66.1107	0
1514	0	1	55	0	0	0	0	0	0	0	0	0	0	0	0	0	0	0	0	0	0	0	0	1	50	0
1515	0	1	20	0	0	0	0	0	0	0	0	0	0	0	0	0	0	0	0	0	0	0	0	1	11.1111	0
1516	1	1	80	0	0	0	0	0	0	0	0	0	0	0	0	0	0	0	0	0	0	0	0	1	99.444	1
1517	1	1	76	0	0	1	0	0	0	0	0	1	0	0	0	0	0	0	0	0	0	1	0	1	126.109	1
1518	0	1	24	0	1	0	0	0	0	0	0	0	0	0	0	0	0	0	0	0	0	0	0	1	15.5556	0
1519	0	1	49	0	0	0	0	0	0	0	0	0	0	0	0	0	0	0	0	0	0	1	0	1	43.3333	0
1520	1	0	33	0	1	0	0	0	0	0	0	1	0	0	0	0	0	0	0	0	0	1	1	1	78.3308	1
1521	1	1	73	0	1	0	0	0	0	0	1	0	0	0	0	0	0	0	0	0	0	1	0	1	91.6662	1
1522	0	1	51	0	0	0	0	0	0	0	0	0	0	0	0	0	0	0	0	0	0	1	0	1	45.5555	0
1523	0	1	41	0	0	0	0	0	0	0	0	0	0	0	0	0	0	0	0	0	0	0	0	1	34.4444	0
1524	0	1	55	0	0	0	0	0	0	0	0	0	0	0	0	0	0	0	0	0	0	0	0	1	50	0
1525	0	1	27	0	0	0	0	0	0	0	0	0	0	0	1	0	0	0	0	0	0	1	0	1	18.8889	0
1526	1	0	68	0	0	0	0	1	1	0	0	1	0	0	0	0	0	0	0	0	0	1	0	1	155.393	1
1527	1	0	23	0	0	0	0	0	0	0	0	1	0	0	0	0	0	0	0	0	0	1	1	1	67.2197	0
1528	0	1	28	0	0	1	0	0	0	0	0	0	0	0	0	0	0	0	0	0	0	0	0	1	20	0
1529	0	1	22	0	0	0	0	0	0	0	1	0	0	0	0	0	0	0	0	0	0	0	0	1	13.3333	0
1530	1	1	42	0	0	0	0	0	0	0	0	0	1	1	0	0	0	0	0	0	0	1	1	1	76.898	1
1531	0	1	45	0	0	0	0	0	0	0	0	0	0	0	0	0	0	0	0	0	0	0	0	1	38.8889	0
1532	0	1	33	0	0	0	0	0	0	0	0	0	0	0	0	0	0	0	0	0	0	0	0	1	25.5556	0
1533	0	1	36	1	0	0	0	0	0	0	0	0	0	0	0	0	0	0	0	0	0	0	0	1	50.1127	0
1534	0	1	26	0	0	0	0	0	0	0	0	0	1	0	0	0	0	0	0	0	0	0	0	1	17.7778	0
1535	0	0	36	0	0	0	0	0	0	0	0	0	0	0	0	0	0	0	0	0	0	0	0	1	28.8889	0
1536	1	1	37	0	0	1	0	0	0	0	0	0	0	0	0	0	0	0	0	0	0	0	0	1	51.6662	0
1537	0	1	37	0	0	0	0	0	0	0	0	0	0	0	0	0	0	0	0	0	0	0	0	1	30	0
1538	1	0	69	0	0	0	1	0	0	0	0	0	0	1	0	0	0	0	0	0	0	0	0	1	121.051	1
1539	0	0	21	0	0	0	0	0	0	0	0	0	0	0	0	0	0	0	0	0	0	0	0	1	12.2222	0
1540	1	0	42	0	0	1	0	0	0	0	0	0	0	0	1	0	0	0	0	0	0	1	0	1	57.2218	0
1541	1	1	76	0	0	0	0	0	0	0	0	0	0	0	0	0	0	0	0	0	0	0	0	1	94.9995	1
1542	1	1	68	1	1	0	1	0	0	0	0	0	0	1	0	0	0	0	0	0	0	0	0	1	141.164	1
1543	1	1	50	0	0	0	0	0	0	0	0	0	0	0	0	0	0	0	0	0	0	0	0	1	66.1107	0
1544	0	1	27	0	0	0	0	0	0	0	0	0	0	0	0	0	0	0	0	0	0	0	0	1	18.8889	0
1545	0	1	45	0	0	0	0	0	0	0	0	0	0	0	0	0	0	0	0	0	0	0	0	1	38.8889	0
1546	0	1	41	0	1	0	0	0	0	0	0	0	0	0	0	0	0	0	0	0	0	0	0	1	34.4444	0
1547	0	1	32	0	0	0	0	0	0	0	0	0	0	0	0	0	0	0	0	0	0	0	0	1	24.4444	0
1548	0	0	24	1	0	0	0	0	0	0	1	0	0	1	0	0	0	0	0	0	0	1	0	1	56.4556	0
1549	1	1	71	0	0	0	0	0	0	0	0	1	0	0	0	0	0	0	1	0	0	1	0	1	157.494	1
1550	0	1	51	0	0	0	0	0	0	0	0	0	0	0	0	0	0	0	0	0	0	1	1	1	45.5555	0
1551	0	1	48	0	0	1	0	0	0	0	0	0	0	0	1	0	0	0	0	0	0	0	0	1	42.2222	0
1552	1	0	73	0	0	0	0	0	0	0	0	0	0	1	0	1	0	0	0	0	0	1	0	1	111.342	1
1553	0	1	37	0	0	0	0	0	0	0	0	0	0	0	0	0	0	0	0	0	0	0	0	1	30	0
1554	0	1	48	0	0	0	0	0	0	0	0	0	0	0	0	0	0	0	0	0	0	0	0	1	42.2222	0
1555	1	0	79	0	0	1	1	0	1	0	0	0	0	0	0	0	0	0	0	0	0	1	0	1	112.486	1
1556	0	1	36	0	0	0	0	0	0	0	0	0	0	0	0	0	0	0	0	0	0	0	0	1	28.8889	0
1557	0	1	47	0	0	0	0	0	0	0	0	0	0	0	0	0	0	0	0	0	0	0	0	1	41.1111	0
1558	1	0	53	0	0	0	0	0	0	0	0	0	0	0	0	0	0	0	0	0	0	0	0	1	69.444	0
1559	1	1	67	0	0	1	0	0	0	0	0	0	0	0	0	0	0	0	0	0	0	1	0	1	84.9995	1
1560	0	1	33	0	0	0	0	0	0	0	0	0	0	1	0	0	0	0	0	0	0	1	0	1	45.2318	0
1561	0	1	35	0	0	0	0	0	0	0	0	0	0	0	0	0	0	0	0	0	0	0	0	1	27.7778	0
1562	0	1	50	0	0	0	0	0	0	0	0	0	0	0	0	0	0	0	0	0	0	0	0	1	44.4444	0
1563	1	1	41	0	0	1	0	0	0	0	0	0	1	0	0	0	0	0	0	0	0	0	0	1	56.1107	0
1564	1	0	48	0	0	0	0	0	0	0	0	0	0	0	0	0	0	0	0	0	0	1	0	1	63.8884	0
1565	0	1	23	0	0	0	0	0	0	0	1	0	0	0	0	0	0	0	0	0	0	1	0	1	14.4444	0
1566	1	0	43	0	0	0	0	0	0	0	0	0	0	1	0	0	0	0	0	0	0	0	0	1	78.0091	1
1567	0	1	33	0	0	0	0	0	0	0	0	0	0	0	0	0	0	0	0	0	0	0	0	1	25.5556	0
1568	0	1	40	0	0	0	0	0	0	0	0	0	0	0	0	0	0	0	0	0	0	1	0	1	33.3333	0
1569	1	1	35	0	0	0	0	0	0	0	0	0	0	0	0	0	0	0	0	0	0	0	0	1	49.444	0
1570	1	0	62	0	1	0	0	1	1	0	0	0	1	0	0	0	0	0	0	0	0	0	0	1	117.617	1
1571	1	0	70	0	0	0	0	0	0	0	0	0	0	1	0	0	0	0	0	0	0	1	0	1	108.009	1
1572	1	1	58	0	0	0	0	0	0	0	0	0	0	0	0	0	0	0	0	0	0	0	0	1	74.9995	0
1573	0	1	50	1	1	0	1	0	0	0	0	0	0	0	0	0	0	0	0	0	0	0	0	1	79.8211	1
1574	0	1	27	1	1	0	1	0	0	0	0	0	0	0	0	0	0	0	0	0	0	0	0	1	54.2656	0
1575	0	1	21	1	1	0	1	0	0	0	0	0	0	0	0	0	0	0	0	0	0	0	0	1	47.5989	0
1576	1	0	47	1	0	1	0	0	0	0	0	0	0	1	0	0	0	0	0	0	0	0	0	1	103.677	1
1577	1	1	55	0	0	0	0	0	0	0	0	0	0	0	0	0	0	0	0	0	0	0	0	1	71.6662	0
1578	1	1	67	0	0	0	0	1	1	0	0	0	0	0	0	0	0	0	0	0	0	1	0	1	123.172	1
1579	0	1	22	1	0	0	0	0	0	0	0	0	0	0	0	0	0	0	0	0	0	1	0	1	34.5571	0
1580	0	1	29	0	0	1	1	0	0	0	0	0	0	1	0	0	0	0	0	0	0	0	0	1	54.9402	0
1581	0	1	28	0	0	0	0	0	0	0	0	0	0	0	0	0	0	0	0	0	0	0	0	1	20	0
1582	0	0	36	0	0	0	0	0	0	0	0	0	0	0	0	0	0	0	0	0	0	1	0	1	28.8889	0
1583	0	1	26	0	0	1	0	0	0	0	1	0	0	0	0	0	0	0	0	0	0	1	0	1	17.7778	0
1584	0	0	28	0	0	0	0	0	0	0	0	0	0	0	0	0	0	0	0	0	0	0	0	1	20	0
1585	0	1	22	0	1	0	0	0	0	0	1	0	0	0	0	0	0	0	0	0	0	0	0	1	13.3333	0
1586	0	1	46	0	0	0	0	0	0	0	0	0	0	0	0	0	0	0	0	0	0	1	0	1	40	0
1587	0	1	26	0	0	0	0	0	0	0	0	0	0	0	0	0	0	0	0	0	0	0	0	1	17.7778	0
1588	0	1	21	0	0	0	0	0	0	0	1	0	0	0	0	0	0	0	0	0	0	0	0	1	12.2222	0
1589	1	1	74	0	0	0	0	0	0	0	0	0	0	1	0	0	0	0	0	0	0	1	1	1	112.454	1
1590	0	1	20	0	0	0	0	0	0	0	1	0	0	0	0	0	0	0	0	0	0	0	0	1	11.1111	0
1591	1	1	66	0	0	0	0	0	0	0	0	0	0	1	0	0	0	0	0	0	0	0	0	1	103.565	1
1592	1	1	22	0	0	1	0	0	0	0	0	0	0	0	0	0	0	0	0	0	0	1	0	1	34.9995	0
1593	0	1	79	0	0	0	0	1	1	0	0	0	0	1	0	0	0	0	0	0	0	1	1	1	134.516	1
1594	1	1	43	0	0	0	1	0	0	0	0	0	0	0	0	0	0	0	0	0	0	0	0	1	72.4858	0
1595	0	1	27	0	0	0	0	0	0	0	1	0	0	0	0	0	0	0	0	0	0	1	0	1	18.8889	0
1596	1	0	25	0	0	0	0	0	0	0	0	0	0	0	0	0	0	0	0	0	0	0	0	1	38.3329	0
1597	1	1	59	0	0	1	0	0	0	0	0	0	0	0	0	0	0	0	0	0	1	0	0	1	76.1107	1
1598	1	1	63	0	0	0	0	0	0	0	0	0	1	0	0	0	0	0	0	0	0	0	0	1	80.5551	1
1599	1	0	51	0	0	0	0	0	0	0	1	0	0	0	0	0	0	0	0	0	0	0	0	1	67.2218	0
1600	1	1	48	0	1	0	0	0	0	0	0	1	0	0	0	0	0	0	0	0	0	1	0	1	94.9975	1
1601	1	0	76	0	0	1	0	0	0	0	0	0	0	0	1	0	0	0	0	0	0	1	0	1	94.9995	1
1602	1	0	44	0	0	0	0	0	0	0	0	0	0	0	0	0	0	0	0	0	0	1	0	1	59.444	0
1603	0	1	45	0	0	0	0	0	0	0	0	0	0	0	0	0	0	0	0	0	0	0	0	1	38.8889	0
1604	0	1	48	0	0	0	0	0	0	0	0	0	0	0	0	0	0	0	0	0	0	0	0	1	42.2222	0
1605	0	0	37	0	0	0	0	0	0	0	0	0	0	1	0	0	0	0	0	0	0	0	0	1	49.6762	0
1606	1	1	45	0	0	0	0	0	0	0	0	0	0	0	0	0	0	0	0	0	0	0	0	1	60.5551	0
1607	1	1	67	0	0	0	0	0	0	0	0	0	0	0	0	0	0	0	0	0	0	0	0	1	84.9995	1
1608	1	0	38	0	0	0	0	0	0	0	0	0	1	0	0	0	0	0	0	0	0	0	0	1	52.7773	0
1609	0	1	35	0	0	0	0	0	0	0	0	0	0	0	0	1	0	0	0	0	0	1	0	1	27.7778	0
1610	0	1	21	0	0	0	0	0	0	0	0	0	0	0	0	0	0	0	0	0	0	1	0	1	12.2222	0
1611	0	1	25	0	1	0	0	0	0	0	0	0	1	0	0	0	0	0	0	0	0	0	0	1	16.6667	0
1612	1	0	65	0	0	1	0	0	0	0	0	0	0	0	0	0	0	0	0	0	0	0	0	1	82.7773	1
1613	1	0	83	0	0	0	0	0	1	0	0	0	0	0	0	0	0	0	0	0	0	1	0	1	102.777	1
1614	0	1	35	0	0	0	0	0	0	0	0	0	0	0	0	0	0	0	0	0	0	0	0	1	27.7778	0
1615	1	1	67	0	0	1	0	0	0	0	0	0	0	1	1	0	0	0	0	0	0	0	0	1	104.676	1
1616	1	0	16	0	1	0	0	0	0	0	0	1	0	1	0	0	0	0	0	0	0	1	0	1	79.1181	1
1617	1	1	73	0	0	0	0	0	0	0	0	0	0	0	0	0	0	0	0	0	0	0	0	1	91.6662	1
1618	1	0	57	0	0	0	0	0	0	0	0	0	0	0	0	0	0	0	0	0	0	1	0	1	73.8884	0
1619	0	1	46	0	0	0	0	0	0	0	0	0	0	0	0	0	0	0	0	0	0	1	0	1	40	0
1620	0	1	25	0	0	0	0	0	0	0	0	0	0	0	0	0	0	0	0	0	0	0	0	1	16.6667	0
1621	1	0	73	0	0	0	0	0	0	1	0	0	0	1	0	0	0	1	0	0	0	1	1	1	172.528	1
1622	0	1	35	0	0	0	0	0	0	0	0	0	0	0	0	0	0	0	0	0	0	1	0	1	27.7778	0
1623	1	0	71	0	0	1	0	0	0	0	0	0	0	0	0	0	0	0	0	0	0	1	0	1	89.444	1
1624	0	1	21	0	0	0	0	0	0	0	0	0	0	0	0	0	0	0	0	0	0	0	0	1	12.2222	0
1625	1	0	71	0	0	0	0	0	0	0	0	0	1	0	1	0	0	0	0	0	0	1	0	1	89.444	1
1626	0	1	33	0	0	0	0	0	0	0	0	0	0	0	0	0	0	0	0	0	0	0	0	1	25.5556	0
1627	1	0	57	0	0	1	0	0	0	0	1	0	0	1	0	0	0	0	0	0	0	0	0	1	93.5647	1
1628	0	1	21	0	0	0	0	0	0	0	1	0	0	0	0	0	0	0	0	0	0	0	0	1	12.2222	0
1629	0	1	27	0	0	0	0	0	0	0	0	0	0	0	1	0	0	0	0	0	0	1	0	1	18.8889	0
1630	1	0	39	0	0	0	0	0	0	0	0	0	0	0	0	0	0	0	0	0	0	0	0	1	53.8884	0
1631	1	0	66	0	0	0	0	0	0	0	0	0	1	0	0	0	0	0	0	0	0	1	0	1	83.8884	1
1632	0	1	36	0	0	1	0	0	0	0	0	0	0	0	0	0	0	0	0	0	0	0	0	1	28.8889	0
1633	0	1	31	0	0	0	0	0	0	0	0	0	0	1	0	0	0	0	1	0	0	0	0	1	79.9501	1
1634	0	1	32	0	0	0	0	0	0	0	0	0	0	0	0	0	0	0	0	0	0	0	0	1	24.4444	0
1635	0	1	40	0	0	1	0	0	0	0	0	0	0	0	0	0	0	0	0	0	0	0	0	1	33.3333	0
1636	0	1	39	0	0	0	0	0	0	0	0	0	0	0	0	0	0	0	0	0	0	1	0	1	32.2222	0
1637	0	1	33	0	0	0	0	0	0	0	0	0	0	0	0	0	0	0	1	0	0	0	0	1	62.496	0
1638	0	1	21	1	1	0	1	0	0	0	0	0	0	0	0	0	0	0	0	0	0	0	0	1	47.5989	0
1639	0	1	25	0	0	0	0	0	0	0	0	0	0	0	0	0	0	0	0	0	0	0	0	1	16.6667	0
1640	0	1	37	0	0	0	0	0	0	0	0	0	0	0	0	0	0	0	0	0	0	0	0	1	30	0
1641	0	1	27	0	0	1	0	1	1	0	0	0	0	0	0	0	0	0	0	0	0	1	0	1	57.0618	0
1642	1	0	56	0	0	0	0	0	0	0	0	0	0	0	0	0	0	0	0	0	0	1	1	1	72.7773	0
1643	0	1	20	0	0	0	1	0	0	0	1	0	0	0	0	0	0	0	0	0	0	0	0	1	25.264	0
1644	0	0	33	0	0	1	0	0	0	0	0	0	0	0	0	0	0	0	0	0	0	1	0	1	25.5556	0
1645	0	0	34	0	0	0	0	0	0	0	0	0	0	1	0	0	0	0	0	0	0	1	0	1	46.3429	0
1646	0	1	48	0	0	0	0	0	0	0	0	0	0	0	0	0	0	0	0	0	0	0	0	1	42.2222	0
1647	0	1	20	0	0	0	0	0	0	0	0	0	1	0	0	0	0	0	0	0	0	1	0	1	11.1111	0
1648	1	1	44	0	0	1	0	0	0	0	0	0	0	1	0	0	0	0	0	0	0	1	0	1	79.1202	1
1649	1	0	50	1	0	0	0	0	0	0	0	0	0	1	0	0	0	0	0	0	0	0	0	1	107.011	1
1650	0	1	35	1	0	0	0	0	0	0	0	0	1	0	0	0	0	0	0	0	0	0	0	1	49.0016	0
1651	1	1	43	1	1	0	1	0	0	0	0	1	0	1	0	0	0	1	0	0	0	1	1	1	144.495	1
1652	0	1	36	0	0	1	0	0	0	0	0	0	0	0	0	0	0	0	0	0	0	0	0	1	28.8889	0
1653	1	0	60	0	0	1	0	0	0	1	0	0	0	1	0	0	0	0	0	0	0	1	0	1	158.084	1
1654	0	1	51	0	0	0	0	0	0	0	0	0	0	0	0	0	0	0	0	0	0	0	0	1	45.5555	0
1655	0	1	42	0	0	0	0	0	0	0	0	0	0	0	0	0	0	0	0	0	0	1	0	1	35.5556	0
1656	1	0	72	0	0	0	0	0	0	0	0	0	0	0	0	0	0	0	0	0	0	0	0	1	90.5551	1
1657	1	0	32	0	0	0	0	0	0	0	0	0	0	1	0	0	0	0	0	0	0	0	0	1	65.7869	0
1658	0	1	50	1	0	0	0	0	0	0	0	0	0	0	0	0	0	0	0	0	0	0	0	1	65.6682	0
1659	1	0	65	0	0	0	0	0	0	0	0	0	0	1	0	0	0	0	0	0	0	1	0	1	102.454	1
1660	0	1	28	0	0	0	1	0	1	0	0	0	1	0	0	0	0	0	0	0	0	1	0	1	34.1529	0
1661	0	1	23	0	0	0	0	0	0	0	0	0	0	0	0	0	0	0	0	0	0	0	0	1	14.4444	0
1662	0	1	53	0	0	0	0	0	0	0	0	0	0	0	0	0	0	0	0	0	0	0	0	1	47.7778	0
1663	0	1	37	0	1	0	0	0	0	0	0	0	0	0	0	0	0	0	0	0	0	1	0	1	30	0
1664	0	1	21	0	0	0	0	0	0	0	0	0	0	0	0	0	0	0	0	0	0	0	0	1	12.2222	0
1665	1	1	61	0	0	0	0	0	0	0	0	0	0	1	0	0	0	0	0	0	0	1	1	1	98.0091	1
1666	1	1	65	0	0	1	0	0	0	0	0	1	0	0	1	0	0	0	0	0	0	0	0	1	113.886	1
1667	1	0	62	0	0	1	0	0	0	0	0	0	0	0	0	0	0	0	0	0	0	1	0	1	79.444	1
1668	0	1	54	0	0	0	0	0	0	0	0	0	0	0	0	0	0	0	0	0	0	1	0	1	48.8889	0
1669	0	1	23	1	0	0	0	0	0	0	0	0	0	0	0	0	1	0	0	0	0	0	0	1	35.6682	0
1670	0	1	21	1	0	0	0	0	0	0	0	0	0	0	0	0	0	0	0	0	0	1	0	1	33.446	0
1671	1	0	22	0	0	0	0	0	0	0	0	0	1	1	0	0	0	0	0	0	0	1	0	1	54.6758	0
1672	0	1	37	1	0	0	0	0	0	0	0	0	1	0	0	0	0	0	0	0	0	0	0	1	51.2238	0
1673	0	1	39	0	0	0	0	0	0	0	0	0	0	0	0	0	0	0	0	0	0	0	0	1	32.2222	0
1674	0	1	38	0	0	0	0	0	0	0	0	0	0	0	0	0	0	0	0	0	0	1	0	1	31.1111	0
1675	1	0	41	0	0	0	0	0	1	0	0	0	1	1	0	0	0	0	0	0	1	0	0	1	75.7869	0
1676	0	1	23	0	0	0	0	0	0	0	0	0	0	0	0	0	0	0	0	0	0	0	0	1	14.4444	0
1677	0	1	27	0	0	0	0	0	0	0	0	0	0	0	0	0	0	0	0	0	0	0	0	1	18.8889	0
1678	1	1	49	0	0	0	0	0	0	0	0	0	0	0	0	0	0	0	0	0	0	0	0	1	64.9995	0
1679	0	1	22	1	1	0	1	0	0	0	1	0	0	0	0	0	0	0	0	0	0	1	0	1	48.71	0
1680	0	0	29	0	0	1	0	0	0	0	0	0	0	0	0	0	0	0	0	0	0	0	0	1	21.1111	0
1681	1	1	71	0	0	0	0	0	0	0	0	1	0	0	0	0	0	0	0	0	1	1	0	1	120.553	1
1682	0	1	24	0	0	0	0	0	0	0	0	0	0	0	0	0	0	0	0	0	0	0	0	1	15.5556	0
1683	0	1	32	0	0	0	0	0	0	0	0	0	1	0	0	0	0	0	0	0	0	1	0	1	24.4444	0
1684	1	1	61	0	0	0	0	0	0	0	0	0	1	0	0	0	0	0	0	0	0	1	0	1	78.3329	1
1685	0	1	38	0	0	0	0	0	0	0	0	0	0	0	0	0	0	0	0	0	0	0	0	1	31.1111	0
1686	0	1	28	1	0	0	0	0	0	0	0	0	1	0	0	0	0	0	0	0	0	0	0	1	41.2238	0
1687	0	1	24	0	0	0	0	0	0	0	0	0	0	0	0	0	0	0	0	0	0	0	0	1	15.5556	0
1688	0	0	30	0	0	0	0	0	0	0	0	0	0	0	0	0	0	0	0	0	0	0	0	1	22.2222	0
1689	0	1	27	0	0	0	0	0	0	0	0	0	0	0	0	0	0	0	0	0	0	0	0	1	18.8889	0
1690	0	1	36	1	0	1	0	0	0	0	0	0	1	0	0	0	0	0	0	0	0	1	0	1	50.1127	0
1691	1	1	73	0	0	0	0	0	0	0	0	0	0	0	0	0	0	0	0	0	0	1	1	1	91.6662	1
1692	1	0	58	0	0	0	0	0	0	0	0	1	0	0	0	0	0	0	0	0	0	0	0	1	106.109	1
1693	1	0	82	0	0	0	0	0	1	0	0	0	0	1	0	0	0	0	0	0	0	1	0	1	121.342	1
1694	0	1	39	0	0	0	0	0	0	0	0	0	1	0	0	0	0	0	0	0	0	0	0	1	32.2222	0
1695	0	1	55	0	0	1	0	0	0	0	0	0	0	0	0	0	0	0	0	0	0	1	0	1	50	0
1696	1	0	59	0	0	1	0	0	0	0	0	0	0	0	0	0	0	0	0	0	0	1	0	1	76.1107	1
1697	0	1	19	0	0	0	0	0	0	0	0	0	0	0	0	0	0	0	0	0	0	1	0	1	10	0
1698	1	0	34	0	0	1	0	0	0	0	0	0	0	0	0	0	0	0	0	0	0	0	0	1	48.3329	0
1699	0	1	35	0	0	0	0	0	0	0	0	0	0	1	0	0	0	0	0	0	0	0	0	1	47.454	0
1700	0	1	34	0	0	0	0	0	0	0	0	1	0	0	0	0	0	0	0	0	0	0	0	1	57.7757	0
1701	1	1	43	0	0	0	0	0	0	0	0	0	0	0	0	0	0	0	0	0	0	1	0	1	58.3329	0
1702	0	0	50	0	0	0	0	0	0	0	0	0	0	0	0	0	0	0	0	0	0	1	0	1	44.4444	0
1703	0	1	25	1	1	0	1	0	0	0	0	0	0	0	0	0	0	0	0	0	0	1	0	1	52.0433	0
1704	1	0	52	0	0	1	0	0	0	0	0	0	0	0	0	0	0	0	0	0	0	0	0	1	68.3329	0
1705	0	1	21	0	0	0	0	0	0	0	0	0	1	0	0	0	0	0	0	0	0	1	1	1	12.2222	0
1706	0	1	59	0	0	1	0	0	0	0	0	0	0	1	0	0	0	0	0	0	0	0	0	1	74.1207	0
1707	0	0	31	0	0	0	0	0	0	0	0	1	0	0	0	0	0	0	0	0	0	0	0	1	54.4424	0
1708	1	1	32	0	0	1	0	0	0	0	0	1	0	1	0	0	0	0	0	0	0	0	0	1	96.8959	1
1709	1	0	44	0	0	1	0	0	0	0	0	0	0	0	0	0	0	0	0	0	0	1	0	1	59.444	0
1710	0	1	34	1	0	0	0	0	1	0	0	0	0	0	0	0	0	0	0	0	0	0	0	1	47.8904	0
1711	1	0	70	0	0	0	0	0	0	0	0	0	0	0	0	0	0	0	0	0	0	1	0	1	88.3329	1
1712	0	0	57	0	0	0	0	0	0	0	0	0	1	0	0	0	0	0	0	0	0	1	0	1	52.2222	0
1713	0	1	34	0	0	0	0	0	0	0	0	0	0	0	0	0	0	0	0	0	0	0	0	1	26.6667	0
1714	0	1	22	0	0	0	0	0	0	0	0	0	0	0	0	0	0	0	0	0	0	1	0	1	13.3333	0
1715	1	0	72	0	0	1	0	0	0	0	0	0	0	0	0	1	0	0	0	0	0	1	0	1	90.5551	1
1716	1	0	59	0	0	0	0	0	0	0	0	0	0	0	0	0	0	0	0	0	0	1	0	1	76.1107	1
1717	0	1	68	0	0	0	0	0	0	0	0	0	0	0	0	0	0	0	0	0	0	1	0	1	64.4444	0
1718	1	0	68	0	0	0	0	0	0	0	0	0	0	0	0	0	0	0	0	0	0	1	0	1	86.1107	1
1719	0	1	29	1	1	0	1	0	0	0	0	0	0	0	0	0	0	0	0	0	0	0	0	1	56.4878	0
1720	1	0	62	0	0	0	0	0	0	0	0	0	1	1	0	0	0	0	0	0	0	1	0	1	99.1202	1
1721	1	1	41	0	0	1	0	0	0	0	0	0	0	0	0	0	0	1	0	0	0	1	0	1	56.1107	0
1722	0	1	24	1	1	0	1	0	0	0	1	0	0	0	0	0	0	0	0	0	0	0	0	1	50.9322	0
1723	0	1	32	0	0	0	0	0	0	0	0	0	0	0	0	0	0	0	0	0	0	0	0	1	24.4444	0
1724	0	0	63	1	1	0	0	0	0	0	0	0	1	0	0	0	0	0	0	0	1	1	1	1	80.1127	1
1725	0	1	50	0	0	0	0	0	0	0	0	0	0	0	0	0	0	0	0	0	0	0	0	1	44.4444	0
1726	0	0	48	0	0	0	0	0	0	0	0	0	0	0	0	0	0	0	0	0	0	0	0	1	42.2222	0
1727	0	1	36	0	0	0	0	0	0	0	0	0	0	0	0	0	0	0	0	0	0	1	0	1	28.8889	0
1728	0	0	40	0	0	0	0	0	0	0	0	0	0	0	0	0	0	0	0	0	0	1	0	1	33.3333	0
1729	0	1	48	0	0	0	0	0	1	1	0	0	0	0	1	0	0	0	0	0	0	1	1	1	103.408	1
1730	0	1	29	0	0	0	0	0	0	0	1	0	0	0	0	0	0	0	0	0	0	1	0	1	21.1111	0
1731	0	1	32	0	0	0	0	0	0	0	1	0	0	0	0	0	0	0	0	0	0	1	0	1	24.4444	0
1732	1	0	63	0	0	0	0	0	0	0	0	0	1	1	0	0	0	0	0	0	0	0	0	1	100.231	1
1733	1	0	70	0	0	0	0	0	0	0	0	0	0	0	0	0	0	0	0	0	0	0	0	1	88.3329	1
1734	1	1	41	0	0	0	0	0	0	0	0	0	1	0	0	0	0	0	0	0	0	0	0	1	56.1107	0
1735	0	1	32	0	0	0	0	0	0	0	0	0	0	1	0	0	0	0	0	0	0	0	0	1	44.1207	0
1736	1	1	50	0	0	0	0	0	0	0	0	0	0	0	0	0	0	0	0	0	0	1	0	1	66.1107	0
1737	1	1	67	0	0	1	0	0	0	0	0	0	0	0	0	1	0	0	0	0	0	0	0	1	84.9995	1
1738	0	1	64	0	0	1	0	0	0	0	0	0	0	0	0	0	0	0	0	0	0	0	0	1	60	0
1739	1	0	38	0	0	1	0	0	0	0	0	0	1	0	0	0	0	0	0	0	0	1	0	1	52.7773	0
1740	0	0	68	0	0	1	0	0	0	0	0	0	0	0	1	0	0	0	0	0	0	1	1	1	64.4444	0
1741	0	1	24	0	0	0	0	0	0	0	0	0	1	0	0	0	0	0	0	0	0	0	0	1	15.5556	0
1742	0	1	23	0	0	0	0	0	0	0	1	0	0	0	0	0	0	0	0	0	0	1	0	1	14.4444	0
1743	0	1	23	1	1	0	1	0	0	0	0	0	1	0	0	0	0	0	0	0	0	0	0	1	49.8211	0
1744	0	1	35	0	0	0	0	0	0	0	0	0	0	0	0	0	0	0	0	0	0	1	0	1	27.7778	0
1745	0	1	44	0	0	0	0	0	0	0	0	0	0	0	0	0	0	0	0	0	0	0	0	1	37.7778	0
1746	0	1	32	0	0	0	0	0	0	0	0	0	1	0	0	0	0	0	0	0	0	0	0	1	24.4444	0
1747	0	1	42	0	0	0	0	0	0	0	0	0	0	0	0	0	0	0	0	0	0	0	0	1	35.5556	0
1748	0	1	22	1	1	0	1	0	0	0	1	0	0	0	0	0	0	0	0	0	0	0	0	1	48.71	0
1749	0	0	36	0	0	0	0	0	0	0	0	0	0	0	0	0	0	0	0	0	0	0	0	1	28.8889	0
1750	0	1	40	0	0	1	0	0	0	0	0	0	0	0	0	0	0	0	0	0	0	1	0	1	33.3333	0
1751	1	0	23	0	0	0	0	0	0	0	0	0	0	0	1	0	0	0	0	0	0	1	0	1	36.1107	0
1752	1	1	75	0	0	0	0	0	0	0	0	0	0	0	0	0	0	0	0	0	0	0	0	1	93.8884	1
1753	0	0	54	0	0	0	0	0	0	0	0	0	1	1	0	0	0	0	0	0	0	0	0	1	68.5651	0
1754	1	1	59	0	0	1	0	0	0	0	0	0	0	0	0	0	0	1	0	0	0	0	0	1	76.1107	1
1755	0	1	23	1	1	0	1	0	0	0	0	0	0	0	0	0	0	0	0	0	0	0	0	1	49.8211	0
1756	1	1	82	0	0	0	0	0	0	0	0	0	0	1	0	0	0	0	0	0	0	1	1	1	121.342	1
1757	0	1	32	1	1	0	0	0	0	0	0	0	0	0	0	0	0	0	0	0	0	0	0	1	45.6682	0
1758	0	1	32	1	0	0	0	0	0	0	0	0	0	0	0	0	0	0	0	0	0	0	0	1	45.6682	0
1759	0	1	22	0	0	1	0	0	0	0	0	0	1	0	0	0	0	0	0	0	0	0	0	1	13.3333	0
1760	0	1	41	0	1	0	0	0	0	0	0	0	0	0	0	0	0	0	1	0	0	0	0	1	71.3849	0
1761	0	1	18	1	0	0	0	0	0	0	1	0	0	0	0	0	0	0	0	0	0	0	0	1	30.1127	0
1762	1	1	51	0	0	0	0	0	0	0	0	0	0	0	0	0	0	0	0	0	0	1	0	1	67.2218	0
1763	1	1	64	0	0	0	0	0	0	0	0	0	0	0	1	0	0	0	0	0	0	0	0	1	81.6662	1
1764	1	1	59	0	0	1	0	0	0	0	0	0	0	0	0	0	0	0	0	0	0	1	0	1	76.1107	1
1765	1	1	53	0	0	0	0	0	0	0	0	0	1	0	0	0	0	0	0	0	0	0	0	1	69.444	0
1766	0	1	24	0	0	0	0	0	0	0	0	0	0	0	0	0	0	0	0	0	0	0	0	1	15.5556	0
1767	0	0	71	0	0	0	0	0	0	0	0	0	0	0	0	0	0	0	0	0	0	0	0	1	67.7778	0
1768	0	1	24	1	1	0	1	0	0	0	0	1	0	0	0	0	0	0	0	0	0	1	0	1	82.0413	1
1769	0	1	32	0	0	0	0	0	0	0	0	0	0	0	0	0	0	0	0	0	0	0	0	1	24.4444	0
1770	1	0	60	0	0	0	0	0	0	0	0	0	0	0	0	0	0	0	0	0	0	1	0	1	77.2218	1
1771	0	1	35	0	0	0	0	0	0	0	0	0	0	0	0	0	0	0	0	0	0	0	0	1	27.7778	0
1772	0	1	38	0	0	0	0	0	0	0	0	0	0	0	0	0	0	0	0	0	0	0	0	1	31.1111	0
1773	0	1	36	0	0	0	0	0	0	0	0	0	0	0	0	0	0	0	0	0	0	1	1	1	28.8889	0
1774	1	1	76	0	0	0	0	0	0	0	0	0	0	0	0	0	0	0	0	0	0	1	1	1	94.9995	1
1775	1	1	23	0	0	0	0	0	0	0	1	0	0	0	0	0	0	0	0	0	0	0	0	1	36.1107	0
1776	1	0	23	0	0	1	0	0	0	0	0	0	0	0	0	0	0	0	0	0	0	1	0	1	36.1107	0
1777	0	1	39	0	0	0	0	0	0	0	0	0	0	0	0	0	0	0	0	0	0	0	0	1	32.2222	0
1778	0	1	44	0	0	0	0	0	0	0	0	0	0	0	0	0	0	0	0	0	0	0	0	1	37.7778	0
1779	0	1	33	0	0	0	0	0	0	0	0	0	0	0	0	0	0	0	0	0	0	0	0	1	25.5556	0
1780	1	0	48	0	0	0	0	0	0	0	0	0	0	0	0	0	0	0	0	0	0	0	0	1	63.8884	0
1781	1	1	70	0	0	0	0	0	0	0	0	0	0	0	0	0	0	0	0	0	0	1	0	1	88.3329	1
1782	0	1	44	0	0	0	0	0	0	0	0	0	0	0	0	0	0	0	0	0	0	1	0	1	37.7778	0
1783	1	1	72	0	0	1	0	0	0	0	0	0	0	0	1	0	0	0	0	0	0	1	0	1	90.5551	1
1784	0	1	28	0	0	0	0	0	0	0	0	0	0	0	0	0	0	0	0	0	0	0	0	1	20	0
1785	0	1	52	0	1	0	0	0	0	0	0	0	0	0	0	0	0	0	1	0	0	1	0	1	83.6072	1
1786	1	0	36	0	0	0	0	0	0	0	0	0	0	0	0	0	0	0	0	0	0	0	0	1	50.5551	0
1787	0	1	29	0	0	0	0	0	0	0	0	0	0	0	0	0	0	0	0	0	0	0	0	1	21.1111	0
1788	1	0	73	0	0	0	0	0	0	0	0	0	0	0	0	0	0	0	0	0	1	1	0	1	91.6662	1
1789	0	1	30	0	1	0	0	0	0	0	0	0	0	0	0	0	0	0	0	0	0	1	0	1	22.2222	0
1790	0	1	22	1	1	0	1	0	0	0	0	0	0	0	0	0	0	0	0	0	0	0	0	1	48.71	0
1791	1	0	65	0	0	1	0	0	0	0	0	0	0	0	0	0	0	0	0	0	0	0	0	1	82.7773	1
1792	0	1	30	0	0	0	0	0	0	0	0	0	1	0	0	0	0	0	0	0	0	0	0	1	22.2222	0
1793	0	1	29	0	0	0	0	0	0	0	0	0	0	0	0	0	0	0	0	0	0	1	0	1	21.1111	0
1794	1	1	32	0	0	0	0	0	0	0	0	0	0	0	0	0	0	0	0	0	0	0	0	1	46.1107	0
1795	0	1	23	0	0	0	0	0	0	0	0	0	0	0	1	0	0	0	0	0	0	0	0	1	14.4444	0
1796	0	1	20	0	0	0	0	0	0	0	1	0	0	0	0	0	0	0	0	0	0	0	0	1	11.1111	0
1797	1	1	81	0	0	0	0	0	0	0	0	0	0	0	0	0	0	0	0	0	0	1	0	1	100.555	1
1798	0	1	28	0	0	0	0	0	0	0	0	0	0	0	0	0	0	0	0	0	0	1	0	1	20	0
1799	0	1	57	0	0	0	0	0	0	0	0	0	0	0	0	0	0	0	0	0	0	0	0	1	52.2222	0
1800	1	0	42	0	0	0	0	0	0	0	0	0	0	0	0	0	0	0	0	0	0	0	0	1	57.2218	0
1801	0	0	31	0	0	0	0	0	0	0	0	0	0	0	0	0	0	0	0	0	0	0	0	1	23.3333	0
1802	1	0	81	0	0	0	0	0	0	0	0	0	0	1	0	0	0	0	0	0	0	1	1	1	120.231	1
1803	0	1	26	1	1	0	1	0	0	0	0	0	0	0	0	0	0	0	0	0	0	0	0	1	53.1545	0
1804	1	1	17	1	1	0	1	0	0	0	0	0	1	0	0	0	0	0	0	0	0	0	0	1	64.8207	0
1805	0	1	44	0	0	0	0	0	0	0	0	0	0	0	0	0	0	0	0	0	0	0	0	1	37.7778	0
1806	0	1	34	1	1	0	0	0	0	0	0	0	0	0	0	0	0	0	0	0	0	0	0	1	47.8904	0
1807	0	1	96	0	0	0	0	0	0	0	0	0	0	0	0	0	0	0	0	0	1	1	1	1	95.5555	1
1808	1	1	60	1	1	0	1	0	1	0	0	0	0	0	0	0	0	0	1	0	0	0	0	1	149.539	1
1809	1	1	21	0	0	0	0	0	0	0	0	0	0	0	0	0	0	0	0	0	0	1	0	1	33.8884	0
1810	0	1	37	0	0	0	0	0	0	0	0	0	0	0	1	0	0	0	0	0	0	0	0	1	30	0
1811	1	0	57	0	0	1	0	0	0	0	0	0	0	0	0	0	0	0	0	0	0	0	0	1	73.8884	0
1812	1	0	77	0	0	0	0	0	0	0	0	0	0	0	0	0	0	0	0	0	0	1	0	1	96.1107	1
1813	0	1	49	0	0	0	0	0	0	0	0	0	0	0	0	0	0	0	0	0	0	1	0	1	43.3333	0
1814	0	1	19	0	0	0	0	0	0	0	0	0	0	0	0	0	0	0	0	0	0	1	0	1	10	0
1815	0	1	29	0	0	0	0	0	0	0	0	0	0	0	0	0	0	0	0	0	0	1	0	1	21.1111	0
1816	0	0	31	0	0	1	0	0	0	0	0	0	0	0	0	0	0	0	0	0	0	1	0	1	23.3333	0
1817	1	1	43	0	0	1	0	0	0	0	0	0	0	0	0	0	0	0	0	0	0	0	0	1	58.3329	0
1818	0	1	38	0	0	0	0	0	0	0	0	0	0	0	0	0	0	0	0	0	0	0	0	1	31.1111	0
1819	0	1	27	0	0	0	0	0	0	0	0	0	0	0	0	0	0	0	0	0	0	0	0	1	18.8889	0
1820	0	0	58	0	0	1	0	0	0	0	0	0	0	1	0	0	0	0	0	0	0	1	0	1	73.0096	0
1821	0	1	43	0	0	0	0	0	0	0	1	0	0	0	0	0	0	0	0	0	0	1	0	1	36.6667	0
1822	1	1	34	1	0	1	0	0	0	0	0	0	0	0	0	0	0	0	0	0	0	1	0	1	69.5567	0
1823	0	1	19	0	0	0	0	0	0	0	1	0	0	0	0	0	0	0	0	0	0	1	0	1	10	0
1824	0	1	21	0	0	0	0	0	0	0	1	0	0	0	0	0	0	0	0	0	0	0	0	1	12.2222	0
1825	0	1	52	1	1	0	1	0	0	0	0	0	0	0	0	0	0	0	0	0	0	1	0	1	82.0433	1
1826	0	1	33	0	0	0	0	0	0	0	0	0	1	0	0	0	0	0	0	0	0	0	0	1	25.5556	0
1827	0	1	32	0	0	1	0	0	0	0	0	0	0	0	0	0	0	0	0	0	0	0	0	1	24.4444	0
1828	1	0	77	0	0	0	0	0	0	1	0	0	0	0	0	0	0	0	0	0	0	1	1	1	157.297	1
1829	0	1	59	0	0	0	0	0	0	0	0	0	0	0	0	0	0	0	0	0	0	1	0	1	54.4444	0
1830	0	1	43	0	1	0	0	0	0	0	0	0	0	0	0	0	0	0	0	0	0	1	0	1	36.6667	0
1831	1	1	58	0	0	0	0	0	0	0	0	0	0	0	0	0	0	0	0	0	0	1	0	1	74.9995	0
1832	0	1	44	0	0	0	0	0	0	0	0	0	0	0	0	0	0	0	0	0	0	1	0	1	37.7778	0
1833	1	0	45	1	1	0	1	0	0	0	0	0	0	0	0	0	0	0	0	0	0	1	0	1	95.9318	1
1834	0	1	42	0	0	0	0	0	0	0	0	0	0	1	0	0	0	1	0	0	0	1	0	1	55.2318	0
1835	1	1	67	0	0	0	0	0	0	0	0	0	0	0	0	0	0	0	0	0	0	1	0	1	84.9995	1
1836	0	1	25	0	0	0	0	0	0	0	0	0	0	0	0	0	0	0	0	0	0	0	0	1	16.6667	0
1837	0	1	45	0	0	0	0	0	0	0	0	0	0	0	0	0	0	0	0	0	0	0	0	1	38.8889	0
1838	0	1	28	0	0	0	0	0	0	0	0	0	0	0	0	0	0	0	0	0	0	0	0	1	20	0
1839	0	1	40	0	0	0	0	0	0	0	0	0	0	0	0	0	0	0	0	0	0	0	0	1	33.3333	0
1840	0	1	47	0	0	0	0	0	0	0	0	0	0	0	0	0	0	0	0	0	0	0	0	1	41.1111	0
1841	0	1	35	0	0	0	0	0	0	0	0	0	0	0	0	0	0	0	0	0	0	0	0	1	27.7778	0
1842	0	1	19	1	1	0	0	0	0	0	0	0	0	0	0	0	0	0	0	0	0	1	0	1	31.2238	0
1843	0	1	30	0	0	0	0	0	0	0	0	0	0	0	0	0	0	0	0	0	0	0	0	1	22.2222	0
1844	0	1	35	1	0	1	0	0	0	0	0	0	0	0	0	0	0	0	0	0	0	0	0	1	49.0016	0
1845	0	1	48	0	0	0	0	0	0	0	0	0	0	0	0	0	0	0	0	0	0	0	0	1	42.2222	0
1846	1	0	69	0	0	0	0	0	0	0	1	0	0	0	0	0	0	0	0	0	0	0	0	1	87.2218	1
1847	0	1	58	0	0	0	0	0	0	0	0	0	0	0	0	0	1	0	0	0	0	0	0	1	53.3333	0
1848	1	0	62	0	0	0	0	0	0	0	0	0	0	1	0	0	0	0	0	0	0	1	0	1	99.1202	1
1849	1	0	31	0	0	0	0	0	0	0	0	0	1	0	0	0	0	0	0	0	0	0	0	1	44.9995	0
1850	0	1	23	0	0	0	0	0	0	0	0	0	0	0	0	0	0	0	0	0	0	0	0	1	14.4444	0
1851	0	1	20	0	0	0	0	0	0	0	0	0	0	0	0	0	0	0	0	0	0	0	0	1	11.1111	0
1852	0	1	29	0	0	0	0	0	0	0	0	0	0	0	0	0	0	0	0	0	0	0	0	1	21.1111	0
1853	1	1	77	1	1	0	1	0	0	0	0	0	0	1	0	0	0	0	0	0	0	1	1	1	151.164	1
1854	1	0	60	0	0	0	0	0	0	0	0	0	0	1	0	0	0	0	0	0	0	1	0	1	96.898	1
1855	0	1	31	0	0	0	0	0	0	0	0	0	0	0	0	0	0	0	0	0	0	0	0	1	23.3333	0
1856	1	1	46	0	0	0	0	0	0	0	0	0	0	1	0	0	0	0	0	0	0	1	1	1	81.3424	1
1857	0	1	38	0	0	0	0	0	0	0	0	0	0	0	0	0	0	0	0	0	0	1	0	1	31.1111	0
1858	0	1	55	0	0	0	0	0	0	0	0	0	0	0	0	0	0	0	0	0	0	1	0	1	50	0
1859	1	1	46	0	0	0	0	0	0	0	0	0	0	0	1	0	0	0	0	0	0	0	0	1	61.6662	0
1860	0	1	29	0	1	0	0	0	0	0	0	0	0	0	0	0	0	0	0	0	0	0	0	1	21.1111	0
1861	0	1	25	0	0	0	0	0	0	0	0	0	0	0	0	0	0	0	0	0	0	0	0	1	16.6667	0
1862	0	0	19	0	0	0	0	0	0	0	0	0	0	0	0	0	0	0	0	0	0	0	0	1	10	0
1863	0	1	59	0	0	0	0	0	0	0	0	0	0	0	0	0	0	0	0	0	0	1	0	1	54.4444	0
1864	0	1	18	0	0	0	0	0	0	0	0	0	0	0	0	0	0	0	0	0	0	0	0	1	8.88889	0
1865	1	1	68	0	0	0	0	0	0	0	0	0	0	0	0	0	0	0	0	0	0	0	0	1	86.1107	1
1866	0	1	31	0	0	0	0	0	0	0	1	0	0	0	0	0	0	0	0	0	0	0	0	1	23.3333	0
1867	1	1	72	0	0	0	0	0	0	0	0	0	0	1	0	0	0	0	0	0	0	0	0	1	110.231	1
1868	0	1	46	0	0	1	0	0	0	0	0	0	0	0	1	0	0	0	0	0	0	0	0	1	40	0
1869	1	1	43	0	0	0	0	0	0	0	0	0	0	0	0	0	0	0	0	0	0	0	0	1	58.3329	0
1870	0	1	21	0	0	0	0	0	0	0	0	0	1	1	0	0	0	0	0	0	0	0	0	1	31.8985	0
1871	0	1	25	0	1	0	0	0	0	0	0	0	1	0	0	0	0	0	0	0	0	0	0	1	16.6667	0
1872	1	1	67	0	0	0	0	0	0	0	0	0	0	0	0	0	0	0	0	0	0	1	0	1	84.9995	1
1873	1	0	79	0	0	1	0	0	0	0	0	0	0	0	0	0	0	0	0	0	0	0	0	1	98.3329	1
1874	1	1	52	0	1	0	0	0	0	0	0	0	0	0	0	0	0	0	0	0	0	1	0	1	68.3329	0
1875	1	1	69	1	1	0	1	0	0	0	0	0	0	1	0	0	0	0	1	0	0	1	1	1	179.215	1
1876	0	1	24	0	0	0	0	0	0	0	0	0	0	0	0	0	0	0	0	0	0	0	0	1	15.5556	0
1877	0	0	34	0	0	0	0	0	0	0	0	1	0	0	0	0	0	0	0	0	0	0	0	1	57.7757	0
1878	0	1	22	1	1	0	1	0	0	0	0	0	0	0	0	0	0	0	0	0	0	0	0	1	48.71	0
1879	0	1	31	0	0	0	0	0	0	0	1	0	0	0	0	0	0	0	0	0	0	0	0	1	23.3333	0
1880	1	0	25	0	0	0	0	0	0	0	0	0	0	0	0	0	0	0	0	0	0	0	0	1	38.3329	0
1881	1	1	59	0	0	1	0	0	0	0	0	0	0	0	0	0	0	0	0	0	0	1	0	1	76.1107	1
1882	0	0	43	0	0	0	0	0	0	0	0	0	0	0	0	0	0	0	0	0	0	1	0	1	36.6667	0
1883	0	0	22	0	0	0	0	0	0	0	0	0	0	0	0	1	0	0	0	0	0	1	0	1	13.3333	0
1884	0	1	33	0	0	0	0	0	0	0	0	0	0	0	0	0	0	0	0	0	0	0	0	1	25.5556	0
1885	1	0	62	0	1	0	0	0	0	1	0	0	0	0	0	0	0	0	0	0	0	1	1	1	140.63	1
1886	0	1	21	0	0	0	0	0	0	0	0	0	0	0	1	0	0	0	0	0	0	0	0	1	12.2222	0
1887	1	0	22	1	1	0	1	0	0	0	0	1	0	0	0	0	0	0	0	0	0	1	1	1	101.485	1
1888	0	0	20	0	0	0	0	0	0	0	0	0	0	0	0	0	0	0	0	0	0	1	0	1	11.1111	0
1889	0	1	29	0	0	0	0	0	0	0	0	0	0	0	0	0	0	0	0	0	0	0	0	1	21.1111	0
1890	1	1	71	0	0	0	0	0	1	0	0	0	0	0	1	0	0	0	0	0	1	1	0	1	89.444	1
1891	0	1	56	0	0	0	0	0	0	0	0	0	0	0	0	0	0	0	0	0	0	0	0	1	51.1111	0
1892	1	1	73	0	0	0	0	0	0	0	0	1	0	0	0	0	0	0	0	0	0	1	0	1	122.775	1
1893	0	1	53	0	0	0	0	0	0	0	0	0	0	0	0	0	0	0	0	0	0	0	0	1	47.7778	0
1894	0	1	57	0	0	0	0	0	0	0	0	0	0	0	0	0	0	0	0	0	0	0	0	1	52.2222	0
1895	1	1	55	0	0	1	0	0	0	0	0	0	0	0	1	0	0	0	0	0	0	0	0	1	71.6662	0
1896	0	1	25	0	0	0	0	0	0	0	0	0	1	0	0	0	0	0	0	0	0	1	0	1	16.6667	0
1897	0	1	22	0	1	0	0	0	0	0	0	0	0	0	0	0	0	0	0	0	0	0	0	1	13.3333	0
1898	1	1	40	1	0	0	0	0	0	0	0	0	0	1	0	0	0	0	0	0	0	1	1	1	95.8996	1
1899	0	1	40	0	0	0	0	0	0	0	0	0	0	0	0	0	0	0	0	0	0	1	0	1	33.3333	0
1900	1	0	64	0	0	0	0	0	0	1	0	0	0	0	0	0	0	0	0	0	0	1	1	1	142.852	1
1901	0	1	29	0	0	0	0	0	0	0	0	0	0	0	0	0	0	0	0	0	0	0	0	1	21.1111	0
1902	1	0	62	0	0	0	0	0	0	0	0	0	1	0	0	0	0	0	0	0	0	1	1	1	79.444	1
1903	0	1	39	0	0	0	0	0	0	0	0	0	0	0	0	0	0	0	0	0	0	0	0	1	32.2222	0
1904	1	1	62	0	0	0	0	0	0	0	0	0	0	0	0	0	0	0	0	0	0	1	0	1	79.444	1
1905	0	1	44	0	0	0	0	0	0	0	0	0	0	0	0	0	0	0	0	0	0	1	0	1	37.7778	0
1906	0	1	24	0	0	0	0	0	0	0	0	0	0	0	0	0	0	0	0	0	0	1	0	1	15.5556	0
1907	0	1	60	0	1	0	0	0	0	0	0	0	0	0	0	0	0	0	0	0	0	0	0	1	55.5555	0
1908	0	0	47	0	0	0	0	0	0	0	0	0	0	0	0	0	0	0	0	0	0	1	0	1	41.1111	0
1909	1	0	37	0	0	0	0	0	0	0	0	0	1	1	0	0	0	0	0	0	0	0	0	1	71.3424	0
1910	0	1	29	0	0	0	0	0	0	0	0	0	0	0	0	0	0	0	0	0	0	0	0	1	21.1111	0
1911	1	0	47	0	0	0	0	0	0	0	0	0	0	0	0	0	0	0	0	0	0	1	0	1	62.7773	0
1912	1	0	77	0	0	0	0	0	0	0	0	1	0	0	0	0	0	1	0	0	0	1	1	1	127.22	1
1913	1	1	72	0	0	0	0	0	0	0	0	0	0	0	0	0	0	0	0	0	0	1	0	1	90.5551	1
1914	0	1	33	0	0	0	0	0	0	0	0	0	0	0	0	0	0	0	0	0	0	0	0	1	25.5556	0
1915	1	0	48	0	0	0	1	0	0	0	0	0	0	0	0	0	0	0	0	0	0	0	0	1	78.0413	1
1916	0	1	22	0	0	0	0	0	1	0	0	0	0	0	0	0	0	0	0	0	0	0	0	1	13.3333	0
1917	1	1	62	0	0	0	0	0	0	0	0	0	0	0	0	0	0	0	0	0	0	1	0	1	79.444	1
1918	0	1	25	0	0	0	0	0	0	0	0	0	0	1	0	0	0	0	0	0	0	0	0	1	36.3429	0
1919	0	0	23	0	1	0	0	0	0	0	0	0	0	0	0	0	0	0	0	0	0	0	0	1	14.4444	0
1920	1	1	40	0	0	0	0	0	0	0	0	0	0	0	0	0	0	0	0	0	0	0	0	1	54.9995	0
1921	1	1	39	0	0	0	0	0	0	0	0	0	0	1	0	0	0	0	0	0	0	1	0	1	73.5647	0
1922	0	0	45	0	0	0	0	0	0	0	0	0	0	0	0	0	0	0	0	0	0	0	0	1	38.8889	0
1923	1	0	49	0	0	0	0	0	0	0	0	0	1	1	0	0	0	0	0	0	0	1	0	1	84.6758	1
1924	1	1	80	0	0	0	0	0	0	0	0	0	0	0	0	0	0	0	0	0	0	1	0	1	99.444	1
1925	1	0	67	0	0	1	0	1	1	0	0	0	0	0	0	0	0	0	0	0	0	0	0	1	123.172	1
1926	0	1	40	0	0	0	0	0	0	0	0	0	0	0	1	0	0	0	0	0	0	0	0	1	33.3333	0
1927	0	1	34	0	0	0	0	0	0	0	0	0	0	0	1	0	0	0	0	0	0	0	0	1	26.6667	0
1928	0	1	53	0	0	0	0	0	0	0	0	0	0	0	0	0	0	0	0	0	0	1	0	1	47.7778	0
1929	1	0	80	0	0	0	0	0	0	0	0	0	1	0	0	0	0	0	0	0	0	1	0	1	99.444	1
1930	0	1	33	0	1	0	0	0	0	0	0	0	0	0	0	0	0	0	0	0	0	0	0	1	25.5556	0
1931	0	0	30	0	0	1	0	0	0	0	0	0	0	0	0	0	0	0	0	0	0	0	0	1	22.2222	0
1932	1	1	77	0	0	0	0	0	0	1	0	0	0	0	0	0	0	0	0	0	0	1	1	1	157.297	1
1933	0	0	27	0	0	0	0	0	0	0	1	0	0	0	0	0	0	0	0	0	0	0	0	1	18.8889	0
1934	0	1	45	0	0	0	0	0	0	0	0	0	0	0	0	0	0	0	0	0	0	0	0	1	38.8889	0
1935	0	1	29	0	0	0	0	0	0	0	0	0	0	0	0	0	0	0	0	0	0	0	0	1	21.1111	0
1936	0	0	66	0	0	0	0	0	0	0	0	0	0	0	0	0	0	0	0	0	0	0	0	1	62.2222	0
1937	1	0	68	0	0	1	0	0	0	0	0	0	0	1	0	0	0	0	0	0	0	1	0	1	105.787	1
1938	0	1	48	0	0	0	0	0	0	0	0	0	0	0	1	0	0	0	0	0	0	0	0	1	42.2222	0
1939	0	1	34	1	1	0	0	0	0	0	0	0	0	0	0	0	0	0	0	0	0	0	0	1	47.8904	0
1940	0	1	28	0	0	1	0	0	0	0	0	1	0	0	0	0	0	0	1	0	0	0	0	1	88.0495	1
1941	0	0	24	0	0	0	0	0	0	0	0	0	0	0	0	0	0	0	0	0	0	0	0	1	15.5556	0
1942	0	1	29	0	0	1	0	0	0	0	1	0	0	0	0	0	0	0	0	0	0	0	0	1	21.1111	0
1943	0	1	22	1	1	0	1	0	0	0	0	0	0	0	0	0	0	0	0	0	0	0	0	1	48.71	0
1944	0	0	21	0	1	0	0	0	0	0	0	0	0	0	0	0	0	0	0	0	0	0	0	1	12.2222	0
1945	0	1	22	1	1	0	1	0	0	0	0	0	0	0	0	0	0	0	0	0	0	0	0	1	48.71	0
1946	0	0	49	0	0	0	0	0	0	0	0	0	0	1	0	0	0	0	0	0	0	1	0	1	63.0096	0
1947	0	1	24	0	0	0	0	0	0	0	0	0	0	0	0	0	0	0	0	0	0	0	0	1	15.5556	0
1948	0	1	35	1	0	0	0	0	0	0	0	0	0	0	0	0	0	0	0	0	0	0	0	1	49.0016	0
1949	0	0	49	0	0	0	0	0	0	0	0	0	0	0	0	0	0	0	0	0	0	0	0	1	43.3333	0
1950	0	1	36	0	0	1	0	0	0	0	0	0	0	0	0	0	0	0	0	0	0	0	0	1	28.8889	0
1951	0	1	26	0	0	0	0	0	0	0	0	0	0	0	0	0	0	0	0	0	0	0	0	1	17.7778	0
1952	0	1	60	0	0	1	0	0	0	0	0	0	0	0	0	0	0	0	0	0	0	1	0	1	55.5555	0
1953	1	1	35	0	0	0	0	0	0	0	0	0	1	0	0	0	0	0	0	0	0	1	0	1	49.444	0
1954	1	1	35	0	0	0	0	0	1	0	0	0	0	0	1	0	0	0	1	0	0	1	1	1	86.3845	1
1955	0	1	47	0	0	0	0	0	0	0	0	0	0	0	0	0	0	0	0	0	0	1	0	1	41.1111	0
1956	0	1	36	0	0	0	0	0	0	0	0	0	0	0	0	0	0	0	0	0	0	0	0	1	28.8889	0
1957	1	0	72	0	0	0	0	0	0	0	0	0	0	0	0	0	0	0	0	0	0	0	0	1	90.5551	1
1958	0	1	21	1	0	0	0	0	0	0	0	0	0	0	0	0	0	0	0	0	0	0	0	1	33.446	0
1959	0	1	28	0	0	0	0	0	0	0	1	0	0	0	0	0	0	0	0	0	0	0	0	1	20	0
1960	0	1	20	0	0	0	0	0	0	0	0	0	0	0	0	0	0	0	0	0	0	0	0	1	11.1111	0
1961	0	0	23	0	0	0	0	0	0	0	0	0	0	0	0	0	0	0	0	0	0	0	0	1	14.4444	0
1962	0	1	34	0	0	0	0	0	0	0	0	0	0	0	0	0	0	0	0	0	0	1	0	1	26.6667	0
1963	1	1	20	0	0	0	0	0	0	0	0	0	0	0	0	0	0	0	0	0	0	0	0	1	32.7773	0
1964	0	1	29	1	1	0	1	0	0	0	0	0	0	0	0	0	0	0	0	0	0	0	0	1	56.4878	0
1965	1	1	44	1	0	0	0	0	0	0	0	0	1	1	0	0	0	0	0	0	0	1	0	1	100.344	1
1966	0	1	42	0	0	0	0	0	0	0	0	0	0	0	0	0	0	0	0	0	0	0	0	1	35.5556	0
1967	0	1	40	0	0	0	0	0	0	0	0	0	0	0	0	0	0	0	0	0	0	1	0	1	33.3333	0
1968	0	1	61	0	1	0	0	0	0	0	0	0	0	0	0	0	0	0	1	0	0	1	0	1	93.6072	1
1969	0	1	39	0	0	0	0	0	0	0	0	0	0	0	0	0	0	0	0	0	0	1	0	1	32.2222	0
1970	0	1	50	0	0	0	0	0	0	0	0	0	0	0	0	0	0	0	0	0	0	1	0	1	44.4444	0
1971	0	1	53	0	0	0	0	0	0	0	0	1	0	1	0	0	0	0	0	0	0	1	0	1	98.563	1
1972	1	0	48	0	0	0	0	0	0	0	0	0	0	0	0	0	0	0	0	0	0	1	1	1	63.8884	0
1973	0	1	34	0	0	0	0	0	0	0	0	0	0	0	0	0	0	0	0	0	0	0	0	1	26.6667	0
1974	0	1	21	1	1	0	1	0	0	0	0	0	0	0	0	0	0	0	0	0	1	0	0	1	47.5989	0
1975	1	0	24	0	0	0	0	0	0	0	0	0	0	0	0	0	0	0	0	0	0	0	0	1	37.2218	0
1976	1	0	61	1	0	1	0	0	0	0	1	0	0	1	0	0	0	0	0	0	0	0	0	1	119.233	1
1977	1	1	69	0	0	0	0	0	0	0	0	0	0	0	0	0	0	0	0	0	0	1	0	1	87.2218	1
1978	1	0	52	0	0	0	0	0	0	0	0	0	1	0	0	0	0	0	0	0	0	1	1	1	68.3329	0
1979	0	1	22	1	1	0	1	0	0	0	0	1	0	0	0	0	0	0	0	0	0	0	0	1	79.819	1
1980	1	1	76	0	0	0	0	0	1	0	0	0	0	1	0	0	0	0	0	0	0	1	1	1	114.676	1
1981	0	0	29	0	0	1	0	0	0	0	0	0	0	0	0	0	0	0	0	0	0	0	0	1	21.1111	0
1982	0	1	45	0	0	0	0	0	0	0	0	0	0	0	0	0	0	0	0	0	0	0	0	1	38.8889	0
1983	1	0	70	1	1	0	1	0	0	0	0	0	0	1	0	1	0	0	0	0	0	1	1	1	143.386	1
1984	1	0	58	0	0	0	0	0	0	0	0	0	1	0	0	0	0	0	0	0	0	0	0	1	74.9995	0
1985	0	1	33	0	0	0	0	0	0	0	0	0	0	0	0	0	0	0	0	0	0	0	0	1	25.5556	0
1986	0	1	19	0	0	1	0	0	0	0	0	0	0	0	0	0	0	0	0	0	0	0	0	1	10	0
1987	0	0	48	0	0	0	0	0	0	0	0	0	0	0	0	0	0	0	0	0	0	0	0	1	42.2222	0
1988	0	1	20	0	0	1	0	0	0	0	1	0	0	0	0	0	0	0	0	0	0	0	0	1	11.1111	0
1989	0	1	28	1	1	0	1	0	0	0	0	0	0	0	0	0	0	0	1	0	0	1	0	1	92.3172	1
1990	0	1	26	0	0	0	0	0	0	0	0	0	0	0	0	0	0	0	0	0	0	0	0	1	17.7778	0
1991	0	0	26	0	0	0	0	0	0	0	1	0	0	0	0	0	0	0	0	0	0	0	0	1	17.7778	0
1992	0	1	28	0	0	0	0	0	0	0	0	0	0	0	0	0	0	0	0	0	0	0	0	1	20	0
1993	0	1	43	0	0	0	0	0	0	0	0	0	0	0	0	0	0	0	0	0	0	0	0	1	36.6667	0
1994	0	1	28	0	0	1	0	0	0	0	0	0	0	0	0	0	0	0	0	0	0	0	0	1	20	0
1995	0	1	27	1	1	0	1	0	0	0	0	0	0	0	0	0	0	0	0	0	0	0	0	1	54.2656	0
1996	0	1	48	0	0	0	0	0	0	0	0	1	0	1	0	0	0	0	0	0	0	1	1	1	93.0075	1
1997	1	0	51	0	0	0	0	0	0	0	0	0	0	0	0	0	0	0	0	0	0	0	0	1	67.2218	0
1998	0	1	30	0	0	0	0	1	1	0	0	0	1	0	0	0	0	0	0	0	0	0	0	1	60.3951	0
1999	0	1	31	0	0	0	0	0	0	0	0	0	0	0	0	0	0	0	0	0	0	0	0	1	23.3333	0
[truncated: 2,623 more rows]
[truncated: 1 more columns]
