# Supplementary material for: Derivation and internal validation of prediction models for pulmonary hypertension risk assessment in a cohort inhabiting Tibet, China
Source: eLife journal article supplement (doi:10.7554/elife.98169), 2024-08-07
Supplement: fig3-data1 [file the data of importing to R-FIgure3-ADG.xlsx]

## Sheet: import data
Tibetan	Gender	Age	RAD	CR	CCR	HVRV	IRBBB	CRBBB	AF	SA	ST	SB	TC	STC	APB	JPB	VPB	PP	CLBBB	IAB	PH	PH2	Set
1	1	74	0	0	1	0	0	0	0	0	0	0	0	0	0	0	0	0	0	0	1	0	1
1	0	81	0	0	1	0	0	0	0	0	0	0	0	0	0	0	0	0	0	0	1	0	1
0	1	58	0	0	0	0	0	0	0	0	0	0	0	0	0	0	0	0	0	0	1	1	1
0	1	42	0	1	0	0	0	0	0	0	0	0	0	0	0	0	0	0	0	0	1	0	1
0	1	23	0	0	0	0	0	0	0	0	0	0	0	0	0	0	0	0	0	0	0	0	1
0	1	26	0	0	0	0	0	0	0	1	0	0	0	0	0	0	0	0	0	0	1	0	1
0	1	23	0	0	0	0	0	0	0	0	0	0	0	0	0	0	0	0	0	0	0	0	1
0	1	32	0	0	0	0	0	0	0	0	0	0	0	0	0	0	0	0	0	0	0	0	1
1	1	20	0	0	0	0	0	0	0	0	0	1	0	0	0	0	0	0	0	0	0	0	1
1	0	49	0	0	0	0	0	0	0	0	0	0	0	0	0	0	0	0	0	0	0	0	1
0	0	73	0	0	0	0	0	0	0	0	0	0	1	0	0	0	0	0	0	0	1	1	1
1	0	36	0	0	1	0	0	0	0	0	0	0	0	0	0	0	0	0	0	0	1	0	1
0	1	36	0	0	0	0	0	0	0	0	0	0	0	0	0	0	0	0	0	0	0	0	1
1	1	61	1	0	0	0	0	0	0	0	0	0	0	0	0	0	0	0	0	1	0	0	1
1	0	56	0	0	1	1	0	0	0	0	0	0	1	0	0	0	0	0	0	0	1	1	1
0	1	38	0	0	0	0	0	0	0	0	0	0	0	0	0	0	0	0	0	0	0	0	1
0	0	38	0	0	0	0	0	0	0	0	0	0	0	0	0	0	0	0	0	0	1	0	1
0	1	21	0	1	0	0	0	0	0	0	0	0	0	1	0	0	0	0	0	0	0	0	1
0	1	44	1	0	0	0	0	0	0	0	0	0	0	0	0	0	0	0	0	0	0	0	1
0	1	51	0	0	0	0	0	0	0	0	0	0	0	0	0	0	0	0	0	0	0	0	1
1	1	49	0	0	1	0	0	0	0	0	0	0	0	0	0	0	0	0	0	0	0	0	1
0	1	30	0	1	0	0	0	0	0	0	0	0	0	0	0	0	0	0	0	0	1	0	1
0	1	42	0	1	0	0	0	0	0	0	0	0	0	1	0	0	0	0	0	0	1	0	1
1	0	70	0	0	1	0	1	1	0	0	0	0	0	0	0	0	0	0	0	0	1	0	1
1	1	77	0	0	0	0	0	0	0	0	0	0	0	0	0	0	0	0	0	1	1	1	1
1	0	66	1	1	0	1	0	1	1	0	0	0	0	0	0	0	0	0	0	0	1	1	1
1	0	62	0	0	0	0	0	0	0	0	0	1	0	0	0	0	0	0	0	0	0	0	1
0	1	30	1	0	1	0	0	0	0	0	0	0	0	0	0	0	0	0	0	0	0	0	1
0	1	41	0	0	0	0	0	0	0	0	0	0	0	0	0	0	0	0	0	0	0	0	1
1	1	75	0	0	1	0	0	0	0	0	0	0	0	0	0	0	0	0	0	0	1	0	1
0	1	25	1	0	0	0	0	0	0	0	0	0	0	0	0	0	0	0	0	0	0	0	1
0	1	19	0	0	0	0	0	0	0	0	0	0	0	0	0	0	0	0	0	0	0	0	1
0	1	58	0	0	0	0	0	0	0	0	0	0	0	0	0	0	0	0	0	0	0	0	1
0	1	22	1	0	0	0	0	0	0	0	0	0	0	0	0	0	0	0	0	0	0	0	1
1	1	40	0	0	0	0	0	0	0	0	0	1	0	0	0	0	0	0	0	0	0	0	1
0	1	29	0	0	0	0	0	0	0	0	0	0	0	0	0	0	0	0	0	0	0	0	1
0	1	28	1	0	0	0	0	0	0	0	0	0	0	0	0	0	0	0	0	0	0	0	1
0	1	60	1	1	0	1	0	0	0	0	0	0	0	0	0	0	0	0	0	0	1	1	1
1	1	20	0	0	0	0	0	0	0	1	0	0	0	0	0	0	0	0	0	0	0	0	1
0	1	34	0	0	0	0	0	0	0	0	0	0	1	0	0	0	0	0	0	0	0	0	1
0	1	34	0	0	0	0	0	0	0	0	0	0	0	0	0	0	0	0	0	0	1	0	1
0	1	34	0	0	0	0	1	1	0	0	1	0	0	0	0	0	0	0	0	0	1	0	1
0	1	48	0	0	1	0	0	0	0	0	0	0	0	0	0	0	0	0	0	0	0	0	1
0	1	70	1	1	0	0	0	0	0	0	0	0	0	0	0	0	0	0	0	0	0	0	1
0	0	55	0	0	0	0	0	0	0	0	0	0	1	0	0	0	0	0	0	0	1	0	1
0	1	49	0	0	0	0	0	0	0	0	0	0	1	0	0	0	0	0	0	0	0	0	1
1	1	71	0	0	0	0	0	0	1	0	0	0	1	0	0	0	0	0	0	0	0	0	1
0	1	28	0	0	0	0	0	0	0	0	0	0	0	0	0	0	0	0	0	0	0	0	1
0	1	72	0	1	0	0	0	0	0	0	0	0	1	0	0	0	0	0	0	0	1	0	1
0	1	41	0	0	0	0	0	0	0	1	0	0	0	0	0	0	0	0	0	0	0	0	1
0	1	36	0	0	1	0	0	0	0	0	0	0	0	0	0	0	0	0	0	0	0	0	1
0	1	22	0	0	0	0	0	0	0	1	0	0	0	0	0	0	0	0	0	0	0	0	1
0	1	30	0	0	0	0	0	0	0	0	0	0	0	0	0	0	0	0	0	0	1	0	1
0	1	33	0	0	1	0	0	0	0	0	0	0	1	0	0	0	0	0	0	0	0	0	1
0	1	39	0	0	0	0	0	0	0	0	0	0	0	0	0	0	0	0	0	0	0	0	1
1	0	73	0	0	0	0	0	0	0	0	0	0	0	0	0	0	0	0	0	0	1	0	1
1	1	74	0	0	1	0	0	0	0	0	0	1	0	0	0	0	0	0	0	0	0	0	1
0	1	36	0	0	0	0	0	0	0	0	0	0	0	0	0	0	0	0	0	0	0	0	1
1	1	50	0	0	0	0	0	0	0	0	0	0	0	0	0	0	0	0	0	0	1	0	1
0	1	33	1	1	0	0	0	0	0	0	0	0	0	0	0	0	0	0	0	0	0	0	1
0	0	22	1	1	0	0	0	0	0	0	0	0	0	0	0	0	0	0	0	0	1	0	1
0	1	30	0	0	0	0	0	0	0	0	0	0	0	0	0	0	0	0	0	0	0	0	1
0	1	24	0	0	0	0	0	0	0	0	0	0	0	0	0	0	0	0	0	0	0	0	1
0	1	35	0	0	0	0	1	1	0	0	0	0	0	0	0	0	0	0	0	0	0	0	1
0	1	24	0	0	0	0	0	0	0	0	0	0	0	0	0	0	0	0	0	0	0	0	1
1	1	23	0	0	0	0	0	0	0	1	0	0	0	1	0	0	0	0	0	0	0	0	1
1	1	20	0	0	0	1	0	0	0	0	0	0	0	0	0	0	0	0	0	0	1	0	1
1	1	73	0	0	0	0	0	0	0	0	0	0	0	0	0	0	0	0	0	0	0	0	1
0	1	26	0	0	1	0	0	0	0	0	0	0	0	0	0	0	0	0	0	0	0	0	1
0	1	23	0	0	0	0	0	0	0	1	0	0	0	0	0	0	0	0	0	0	0	0	1
1	1	71	0	0	0	0	0	0	0	0	0	0	0	0	0	0	0	0	0	0	1	0	1
0	1	51	0	0	0	0	0	0	0	0	0	0	0	0	0	0	0	0	0	0	0	0	1
0	1	15	0	0	0	0	0	0	0	0	0	0	0	0	0	0	0	0	0	0	0	0	1
0	1	53	0	0	0	0	0	0	0	0	0	0	0	0	0	0	0	0	0	0	0	0	1
0	1	45	0	0	0	0	0	0	0	0	0	0	0	0	0	0	0	0	0	0	0	0	1
0	1	61	0	1	0	0	0	0	0	0	0	0	0	0	0	0	0	0	0	0	0	0	1
1	1	27	0	0	1	0	0	0	0	0	0	0	0	0	0	0	0	0	0	0	1	0	1
0	1	39	0	1	0	0	0	0	0	0	0	0	0	0	0	0	0	0	0	0	0	0	1
0	1	27	0	0	0	0	0	0	0	1	0	0	0	0	0	0	0	0	0	0	0	0	1
1	1	35	0	0	0	0	0	0	0	0	1	0	0	0	0	0	0	0	0	0	0	0	1
1	0	28	0	0	1	0	0	0	0	0	0	0	0	0	0	0	0	0	0	0	0	0	1
0	1	31	0	0	0	0	0	0	0	0	0	0	0	0	0	0	0	0	0	0	1	0	1
0	1	21	0	0	1	0	0	0	0	0	0	0	0	0	0	0	0	0	0	0	0	0	1
0	1	25	0	0	0	0	0	0	0	0	0	1	0	0	0	0	0	0	0	0	0	0	1
1	0	65	0	0	0	0	0	0	0	0	0	0	0	0	0	0	0	0	0	0	1	0	1
1	1	50	0	0	0	0	0	0	0	0	0	0	0	0	0	0	0	0	0	0	1	0	1
0	1	46	0	0	0	1	0	0	0	0	0	0	0	0	0	0	0	0	0	0	1	0	1
0	0	48	0	0	0	0	0	0	0	0	0	0	0	0	0	0	0	0	0	0	0	0	1
0	1	21	0	0	0	0	0	0	0	0	0	0	0	0	0	0	0	0	0	0	0	0	1
1	0	35	0	0	1	0	0	0	0	1	0	0	0	0	0	0	0	0	0	0	0	0	1
0	1	33	0	0	0	0	0	0	0	0	1	0	0	0	0	0	0	0	0	0	0	0	1
1	0	80	0	0	0	0	0	0	0	0	0	0	1	0	0	0	0	0	0	0	1	1	1
1	1	86	0	0	0	0	0	0	0	0	0	0	0	0	0	0	0	0	0	0	1	0	1
0	1	28	0	0	0	0	0	0	0	0	0	0	0	0	0	0	0	0	0	0	0	0	1
0	0	45	1	1	0	1	0	0	0	0	0	0	0	0	0	0	0	0	0	0	1	0	1
1	1	51	0	0	1	0	0	0	0	0	0	0	1	0	0	0	0	0	0	0	1	0	1
1	0	61	0	0	0	0	0	0	0	0	0	0	1	0	0	0	0	0	0	0	1	1	1
0	1	35	0	0	0	1	0	0	0	0	0	0	0	0	0	0	0	0	0	0	1	0	1
1	0	43	0	0	0	0	0	0	0	0	0	0	1	0	0	0	0	0	0	0	1	0	1
0	1	33	0	0	0	0	0	0	0	0	0	0	0	0	0	0	0	0	0	0	0	0	1
0	1	36	0	0	0	0	0	0	0	0	0	0	0	0	0	0	0	0	0	0	0	0	1
1	0	50	0	0	0	0	0	0	0	0	0	0	0	0	0	0	0	0	0	0	0	0	1
0	0	50	0	0	1	0	0	0	0	0	0	0	0	1	0	0	0	0	0	0	1	0	1
0	1	22	0	0	0	0	0	0	0	0	0	1	0	0	0	0	0	0	0	0	0	0	1
0	1	39	0	0	0	0	0	0	0	0	0	0	0	0	0	0	0	0	0	0	0	0	1
0	1	18	0	0	0	0	0	0	0	0	0	0	0	0	0	0	0	0	0	0	0	0	1
1	0	43	0	0	0	0	0	0	0	0	0	0	0	0	0	0	0	0	0	0	1	0	1
1	1	46	0	0	0	0	0	0	0	0	0	0	0	0	0	0	0	0	0	0	1	1	1
1	0	62	0	0	0	0	0	0	0	0	0	0	0	0	0	0	0	0	0	0	1	0	1
0	1	33	0	0	0	0	0	0	0	0	0	0	0	0	0	0	0	0	0	0	0	0	1
0	1	21	1	1	0	0	0	0	0	0	0	1	0	0	0	0	0	0	0	0	1	0	1
0	0	53	0	0	0	0	0	0	0	0	0	0	0	1	0	0	0	0	0	0	1	0	1
1	1	60	0	0	0	0	0	0	0	0	0	0	0	0	0	0	0	0	0	0	1	1	1
1	0	49	0	0	0	0	0	0	0	0	0	0	0	0	0	0	0	0	0	0	0	0	1
1	0	22	0	0	1	0	0	0	0	0	1	0	1	0	0	0	0	0	0	0	1	0	1
1	1	68	0	0	1	0	0	0	0	0	0	0	0	0	0	0	0	0	0	0	0	0	1
1	0	70	0	0	0	0	0	0	0	1	0	0	0	0	0	0	0	0	0	0	1	0	1
0	1	35	0	0	0	0	0	0	0	0	0	0	0	0	0	0	0	0	0	0	0	0	1
0	0	34	0	0	0	0	0	0	0	0	0	0	0	0	0	0	0	0	0	0	0	0	1
0	1	33	0	0	0	0	0	0	0	0	0	1	0	0	0	0	0	0	0	0	1	0	1
0	1	33	0	0	0	0	0	0	0	1	0	0	0	0	0	0	0	0	0	0	1	0	1
0	1	36	0	0	0	0	0	0	0	0	0	0	0	0	0	0	0	0	0	0	0	0	1
0	0	43	0	0	0	0	0	1	0	0	0	0	0	0	0	0	0	0	0	0	0	0	1
0	1	36	0	0	0	0	0	0	0	0	0	1	0	0	0	0	0	0	0	0	0	0	1
0	1	26	0	0	0	0	0	0	0	0	0	0	0	0	0	0	0	0	0	0	1	0	1
1	0	84	0	0	0	0	1	1	0	0	0	0	0	1	0	0	0	0	0	1	1	1	1
1	0	37	0	0	1	0	0	0	0	0	0	0	0	0	0	0	0	0	0	0	0	0	1
1	1	43	1	1	0	1	0	0	0	0	0	0	0	0	0	0	0	0	0	0	1	0	1
0	1	34	0	1	0	0	0	0	0	0	0	1	0	0	0	0	0	0	0	0	1	0	1
0	1	31	0	0	1	0	0	0	0	1	0	0	0	0	0	0	0	0	0	0	1	0	1
0	1	31	0	0	0	0	0	0	0	0	0	0	0	0	0	0	0	0	0	0	0	0	1
1	1	29	1	1	0	0	0	0	0	0	0	0	0	0	0	0	0	0	0	0	0	0	1
0	0	53	0	0	1	0	0	0	0	0	0	0	0	0	0	0	0	0	0	0	1	0	1
0	0	36	0	0	0	0	0	0	0	0	0	0	0	0	0	0	0	0	0	0	0	0	1
1	0	45	0	0	0	0	0	0	0	0	0	0	0	0	0	0	0	0	0	0	0	0	1
0	1	24	0	0	0	0	0	0	0	0	0	0	0	0	0	0	0	0	0	0	0	0	1
0	1	29	1	1	0	1	0	0	0	0	0	1	0	0	0	0	0	0	0	0	1	0	1
0	1	24	0	0	0	0	0	0	0	0	0	0	1	0	0	0	0	0	0	0	0	0	1
0	1	22	0	0	0	0	0	0	0	1	0	0	0	0	0	0	0	0	0	0	0	0	1
0	1	28	0	0	0	0	0	0	0	0	0	0	0	0	0	0	0	0	0	0	0	0	1
0	1	34	0	1	0	0	0	0	0	0	0	0	0	0	0	0	0	0	0	0	1	0	1
1	0	60	0	0	0	0	0	0	0	0	1	0	0	0	0	0	0	1	0	0	1	1	1
1	0	37	0	0	0	0	0	0	0	0	0	0	1	0	0	0	0	0	0	0	1	0	1
1	0	65	0	0	0	0	0	0	0	0	0	0	0	0	0	0	0	0	0	0	0	0	1
1	1	56	1	0	0	0	0	0	0	0	1	0	1	0	0	0	0	0	0	0	1	1	1
1	0	30	0	0	1	0	0	0	0	0	0	0	0	0	0	0	0	0	0	0	1	0	1
0	1	40	0	0	0	0	0	0	0	0	0	1	0	0	0	0	0	0	0	0	0	0	1
0	1	30	1	1	0	1	0	0	0	0	0	0	0	0	0	0	0	0	0	0	1	0	1
0	1	28	0	0	1	0	0	0	0	0	0	0	0	0	0	0	1	0	0	0	0	0	1
0	1	22	1	1	0	1	0	0	0	1	0	0	0	0	0	0	0	0	0	0	0	0	1
0	0	44	0	0	0	0	0	0	0	0	0	0	0	0	0	0	0	0	0	0	0	0	1
1	1	67	0	0	1	0	0	1	0	0	0	0	0	0	0	0	0	0	0	0	0	0	1
1	1	68	0	1	0	0	0	0	0	0	0	0	1	0	0	0	0	0	0	0	1	1	1
1	1	69	0	0	0	0	0	0	1	0	0	0	0	0	0	0	0	0	0	0	1	1	1
0	1	30	0	1	0	0	0	0	0	0	0	0	0	0	0	0	0	0	0	0	0	0	1
1	0	52	0	0	0	0	0	0	0	0	0	0	0	0	0	0	0	0	0	1	1	1	1
1	0	36	0	0	1	0	0	0	0	0	0	1	0	0	0	0	0	0	0	0	1	0	1
0	1	30	0	0	0	0	0	0	0	0	0	0	0	0	0	0	0	0	0	0	0	0	1
0	1	37	0	0	0	0	0	0	0	0	0	0	0	0	0	0	0	0	0	0	0	0	1
1	1	92	0	0	0	0	0	0	0	0	0	0	0	0	0	0	0	0	0	0	1	0	1
0	1	44	0	0	0	0	0	0	0	0	0	0	0	0	0	0	0	0	0	0	1	0	1
1	1	22	0	0	0	0	0	0	0	0	0	0	0	0	0	0	0	0	0	0	0	0	1
0	1	45	0	0	1	0	0	0	0	0	0	1	0	0	0	0	0	0	0	0	0	0	1
0	1	21	0	0	0	0	0	0	0	0	0	1	1	0	0	0	0	0	0	0	1	0	1
1	1	26	0	0	0	0	0	0	0	0	0	0	0	0	0	0	0	0	0	0	0	0	1
0	1	26	0	1	0	0	0	0	0	0	0	0	0	0	0	0	0	0	0	0	0	0	1
0	1	33	0	1	0	0	0	0	0	0	0	0	0	0	0	0	0	0	0	0	0	0	1
0	1	26	0	0	0	0	0	0	0	0	0	0	0	0	0	0	0	1	0	0	1	0	1
1	1	78	0	0	0	0	0	1	0	0	0	0	1	0	0	0	0	0	0	0	1	1	1
0	1	49	0	0	0	0	0	0	0	0	0	0	0	0	0	0	0	0	0	0	0	0	1
1	0	67	0	0	1	0	0	0	0	0	0	0	1	0	0	0	0	0	0	0	1	0	1
0	1	22	0	1	0	0	0	0	0	1	0	0	0	0	0	0	0	0	0	0	0	0	1
1	1	56	1	1	0	1	0	0	0	0	1	0	0	0	0	0	0	0	0	0	0	0	1
1	1	73	0	0	0	0	0	0	0	0	0	0	0	0	0	0	0	0	0	0	1	0	1
1	1	26	0	0	0	0	0	0	0	0	0	0	0	0	0	0	0	0	0	0	0	0	1
1	0	66	0	0	0	0	0	1	1	0	0	0	0	0	0	0	0	0	0	0	1	1	1
0	1	26	0	0	0	0	0	0	0	0	0	0	0	0	0	0	0	0	0	0	0	0	1
1	1	70	0	0	1	0	0	0	0	0	0	0	0	0	0	0	0	0	0	0	1	0	1
0	1	20	0	0	0	0	0	0	0	0	0	0	0	0	0	0	0	0	0	0	0	0	1
0	1	50	0	0	0	0	0	0	0	0	0	0	0	0	0	0	0	0	0	0	0	0	1
1	0	74	1	1	0	1	0	1	0	0	0	0	0	0	0	0	1	0	0	0	1	0	1
1	1	78	0	0	1	0	0	0	0	0	0	0	0	0	0	0	0	0	0	0	0	0	1
0	0	23	0	0	0	0	0	0	0	0	0	0	0	0	0	0	0	0	0	0	1	0	1
0	1	31	1	1	0	1	0	0	0	0	0	0	0	0	0	0	0	0	0	0	0	0	1
0	0	62	0	0	1	0	0	0	0	0	0	0	0	1	0	0	0	0	0	0	0	0	1
0	0	23	0	0	0	0	0	0	0	0	1	0	0	0	0	0	0	0	0	0	0	0	1
1	0	64	0	0	1	0	0	0	0	0	1	0	0	0	0	0	0	0	0	0	1	1	1
0	1	51	0	0	1	0	0	0	0	0	0	0	0	0	0	0	0	0	0	0	1	0	1
1	1	81	0	1	0	0	0	0	0	0	0	0	0	0	0	0	0	0	0	1	0	0	1
0	1	33	0	0	1	0	0	0	0	1	0	0	0	0	0	0	0	0	0	0	0	0	1
0	1	30	0	0	0	0	0	0	0	0	0	0	1	0	0	0	0	0	0	0	1	0	1
1	0	44	0	0	0	1	0	0	0	0	0	0	1	0	0	0	0	0	0	0	0	0	1
0	1	29	0	0	0	0	0	0	0	0	0	0	0	0	0	0	0	0	0	0	0	0	1
1	1	52	0	0	0	0	0	0	0	0	0	0	0	0	0	0	0	0	0	0	0	0	1
0	1	34	0	0	0	0	0	0	0	0	0	0	0	0	0	0	0	0	0	0	0	0	1
1	1	40	0	0	0	0	0	0	0	0	0	1	0	0	0	0	0	0	0	0	1	0	1
0	1	23	1	1	0	1	0	0	0	0	0	0	0	0	0	0	0	0	0	0	0	0	1
1	0	41	0	0	1	0	0	0	0	0	0	0	0	0	0	0	0	0	0	0	0	0	1
0	1	24	0	0	0	0	0	0	0	0	0	0	0	0	0	0	0	0	0	0	0	0	1
0	1	46	0	0	0	0	0	0	0	0	0	0	0	0	0	0	0	0	0	0	1	0	1
0	1	26	0	0	0	0	0	0	0	0	0	0	0	0	0	0	0	0	0	0	0	0	1
1	1	38	0	0	1	0	0	0	0	0	0	0	0	0	0	0	0	0	0	0	1	0	1
0	1	35	0	0	0	0	0	0	0	0	0	0	0	0	0	0	0	0	0	0	1	0	1
0	1	29	1	0	0	0	0	0	0	0	0	0	0	0	0	0	0	0	0	0	1	0	1
1	1	53	1	1	0	1	0	0	0	0	0	0	1	0	0	0	0	0	0	0	1	0	1
0	1	34	0	0	0	0	0	0	0	0	0	0	0	0	0	0	0	0	0	0	1	0	1
0	1	21	0	0	0	0	0	0	0	1	0	0	0	0	0	0	0	0	0	0	0	0	1
1	0	62	0	0	1	0	0	0	0	0	0	0	0	0	0	0	0	0	0	0	0	0	1
0	1	30	0	0	1	0	0	0	0	0	0	0	0	0	0	0	0	0	0	0	0	0	1
1	0	26	0	0	0	0	0	0	0	0	0	0	0	0	0	0	0	0	0	0	0	0	1
1	1	39	0	0	0	0	1	1	0	0	0	0	0	0	0	0	0	0	0	0	1	1	1
1	1	63	1	1	0	0	1	1	0	0	1	0	0	0	0	0	0	0	0	0	1	0	1
1	0	50	0	0	1	0	0	0	0	0	0	0	0	0	0	0	0	0	0	0	1	0	1
0	1	28	0	0	0	0	0	0	0	1	0	0	0	0	0	0	0	0	0	0	0	0	1
1	1	46	0	0	0	0	0	0	0	0	0	0	0	0	0	0	0	0	0	0	0	0	1
0	0	20	0	0	0	0	0	0	0	1	0	0	0	0	0	0	0	0	0	0	0	0	1
1	1	66	1	1	0	1	1	1	0	0	0	0	0	0	0	0	0	0	0	0	0	0	1
0	1	22	1	1	0	0	0	0	0	0	0	0	0	0	0	0	0	0	0	0	1	0	1
0	1	47	1	1	0	1	0	0	0	0	0	0	0	0	0	0	0	0	0	0	1	1	1
1	1	63	0	0	0	0	0	0	0	0	0	0	0	1	0	0	0	0	0	0	1	1	1
0	1	56	0	0	0	0	0	0	0	0	0	0	0	0	0	0	0	0	0	1	1	0	1
0	1	45	0	0	0	0	0	0	0	1	0	0	0	1	0	0	0	0	0	0	0	0	1
0	0	52	0	1	0	0	0	0	0	0	0	0	0	0	0	0	0	0	0	0	1	0	1
1	0	59	1	1	0	1	0	0	1	0	0	0	0	1	0	0	0	0	0	1	1	1	1
0	1	64	0	0	0	0	0	0	0	0	1	0	0	0	0	0	0	0	0	0	1	0	1
1	0	58	0	0	0	0	0	0	0	0	0	0	0	0	0	0	0	0	0	0	1	0	1
0	1	53	0	0	0	0	0	0	0	1	0	0	0	0	0	0	0	0	0	0	1	0	1
0	1	26	1	1	0	1	0	0	0	0	0	0	0	0	0	0	0	0	0	0	0	0	1
1	1	33	0	0	0	0	0	0	0	0	0	0	0	0	0	0	0	0	0	0	0	0	1
0	1	30	0	0	0	0	0	0	0	0	0	0	1	0	0	0	0	1	0	0	0	0	1
0	1	42	1	0	0	0	0	0	0	0	0	0	0	0	0	0	0	0	0	0	0	0	1
0	0	47	0	0	0	0	0	0	0	0	0	0	0	0	0	0	0	0	0	0	0	0	1
0	1	44	0	0	0	0	0	0	0	0	0	0	0	0	0	0	0	0	0	0	1	0	1
0	0	47	0	0	1	0	0	0	0	0	0	1	0	0	0	0	0	0	0	0	1	0	1
0	1	54	0	0	0	0	0	0	0	0	1	0	0	1	0	0	0	0	0	0	1	0	1
0	1	49	0	0	0	0	0	0	0	0	0	0	0	0	0	0	0	0	0	0	0	0	1
1	0	54	0	0	0	0	0	0	0	0	0	0	0	0	0	0	0	0	0	0	0	0	1
0	1	43	0	0	1	0	0	0	0	0	0	0	0	0	0	0	0	0	0	0	1	0	1
1	0	56	0	0	1	0	0	0	0	0	0	0	0	0	0	0	0	0	0	0	0	0	1
0	1	34	0	0	0	0	0	0	0	0	0	0	0	0	0	0	0	0	0	0	0	0	1
0	1	64	0	0	1	0	0	0	0	0	0	0	0	1	0	0	0	0	0	0	0	0	1
0	1	31	0	0	0	0	0	0	0	0	0	0	0	1	0	0	0	0	0	0	0	0	1
1	0	42	0	0	0	0	0	0	0	0	0	1	0	0	0	0	0	0	0	0	1	0	1
1	1	37	0	0	0	0	0	0	0	0	0	0	1	0	0	0	0	0	0	0	1	0	1
1	1	74	0	0	0	0	0	1	0	0	0	0	0	0	0	0	0	0	0	1	1	0	1
1	0	62	0	0	0	0	0	0	0	0	0	0	1	0	0	0	0	0	0	0	1	0	1
0	0	57	0	0	1	0	0	0	0	0	0	1	0	0	0	0	0	0	0	0	1	0	1
0	1	44	0	0	0	0	0	0	0	0	0	0	0	1	0	0	0	0	0	0	0	0	1
0	1	33	0	0	0	0	0	0	0	1	0	0	0	0	0	0	0	0	0	0	0	0	1
1	1	55	0	0	0	0	0	0	0	0	0	0	0	1	0	0	0	0	0	0	0	0	1
0	1	24	0	0	0	0	0	0	0	0	0	0	0	0	0	0	0	0	0	0	1	0	1
1	1	24	0	0	0	0	0	0	0	0	0	0	0	0	0	0	0	0	0	0	0	0	1
0	0	51	0	0	0	0	0	0	0	0	0	0	0	0	0	0	0	0	0	0	0	0	1
0	1	34	0	0	0	0	0	0	0	0	0	0	1	0	0	0	0	0	0	0	0	0	1
1	1	68	0	0	0	1	0	0	0	0	0	0	1	0	0	0	0	0	0	0	1	1	1
0	1	26	1	0	0	0	0	0	0	0	0	1	0	0	0	0	0	0	0	0	0	0	1
0	1	26	0	0	0	0	0	0	0	0	0	0	0	0	0	0	0	0	0	0	1	0	1
1	0	48	0	0	0	0	0	0	0	0	0	1	0	0	0	0	0	0	0	0	1	0	1
0	1	46	0	0	0	0	0	0	0	0	0	0	0	0	0	0	0	0	0	0	0	0	1
1	1	66	0	0	0	0	0	0	0	0	0	0	0	0	0	0	0	0	0	0	0	0	1
1	1	23	0	0	0	0	0	0	0	0	0	0	0	0	0	0	0	1	0	0	0	0	1
0	1	40	0	0	0	0	0	0	0	0	0	0	0	0	0	0	0	0	0	0	0	0	1
0	1	83	0	0	0	0	0	0	0	0	0	0	0	0	0	0	0	0	0	0	1	0	1
1	1	71	0	0	0	0	0	0	0	0	0	0	0	0	0	0	0	0	0	0	0	0	1
0	1	43	0	0	1	0	0	0	0	0	1	0	0	0	0	0	0	0	0	0	1	0	1
0	1	50	0	0	0	0	0	0	0	0	0	0	0	0	0	0	0	1	0	0	0	0	1
1	1	69	0	0	0	0	0	0	1	0	0	0	0	0	0	0	0	0	0	0	1	1	1
0	1	40	0	0	0	0	0	0	0	0	0	0	0	0	0	0	0	0	0	0	1	0	1
1	1	60	0	0	0	0	0	0	0	0	0	1	0	0	0	0	0	0	0	0	1	0	1
0	1	41	0	0	0	0	0	0	0	0	0	0	0	0	0	0	0	0	0	0	0	0	1
0	1	33	0	0	1	0	0	0	0	1	0	0	0	1	0	0	0	0	0	0	1	0	1
0	1	43	0	0	0	0	0	0	0	0	0	0	0	0	0	0	0	0	0	0	0	0	1
0	1	25	0	0	0	0	0	0	0	0	0	0	0	0	0	0	0	0	0	0	0	0	1
0	1	50	0	0	1	0	0	0	0	0	0	0	0	0	0	0	0	0	0	0	0	0	1
0	1	42	0	0	0	0	0	0	0	0	0	0	0	0	0	0	0	0	0	0	0	0	1
1	0	68	0	0	0	0	0	0	0	0	0	0	1	0	0	0	0	0	0	0	1	0	1
0	1	29	0	0	1	0	0	0	0	0	0	0	0	0	0	0	0	0	0	0	1	0	1
0	1	24	0	0	0	0	0	0	0	0	0	0	0	0	0	0	0	0	0	0	0	0	1
0	1	42	0	0	0	0	0	0	0	0	0	1	0	0	0	0	0	0	0	0	0	0	1
0	1	23	0	0	0	0	0	0	0	0	0	0	1	0	0	0	0	0	0	0	0	0	1
0	1	38	1	1	0	0	0	0	0	1	0	0	0	0	0	0	0	0	0	0	1	0	1
0	1	43	0	0	0	0	0	0	0	0	0	0	0	0	0	0	0	0	0	0	0	0	1
0	1	38	1	0	0	0	0	0	0	1	0	0	0	1	0	0	0	0	0	0	1	0	1
1	1	33	1	0	0	0	0	0	0	0	0	0	0	0	0	0	0	0	0	0	0	0	1
0	1	30	0	0	0	0	0	0	0	0	0	0	1	0	0	0	0	0	0	0	0	0	1
0	1	33	0	0	0	0	0	0	0	0	0	0	0	0	0	0	0	0	0	0	0	0	1
1	0	29	0	0	1	0	0	0	0	0	0	0	0	0	0	0	0	0	0	0	0	0	1
1	0	59	0	0	0	0	0	0	0	0	0	0	1	0	0	0	0	1	0	0	0	0	1
0	0	47	0	0	0	0	0	0	0	0	0	0	1	0	0	0	0	0	0	0	0	0	1
1	0	75	1	1	0	1	0	1	1	0	0	0	0	0	0	0	0	0	0	0	1	1	1
1	1	82	0	1	0	0	0	0	0	0	0	0	1	0	0	0	0	0	0	0	1	1	1
0	0	26	1	0	0	1	0	0	0	0	0	0	1	0	0	0	0	0	0	0	0	0	1
1	0	33	0	0	1	0	0	0	0	0	0	1	0	0	0	0	0	0	0	0	1	0	1
0	1	23	1	1	0	0	0	0	0	0	0	0	0	0	0	0	0	0	0	0	0	0	1
0	1	23	1	0	0	0	0	0	0	0	0	0	0	0	0	0	0	0	0	0	0	0	1
1	0	66	0	0	0	0	0	0	0	0	0	0	0	0	0	0	0	0	0	0	0	0	1
1	1	59	0	0	0	0	0	0	0	0	0	0	0	0	0	0	0	0	0	0	1	0	1
1	0	75	0	0	1	0	0	0	0	0	0	0	0	0	0	0	0	0	0	0	0	0	1
0	1	33	1	1	0	0	0	0	0	0	0	1	0	0	0	0	0	0	0	0	1	0	1
1	1	55	0	0	0	0	1	1	0	0	0	1	0	0	0	0	0	0	0	0	1	1	1
0	1	45	0	0	0	0	0	0	0	0	0	0	0	0	0	0	0	0	0	0	0	0	1
1	0	49	0	0	1	0	0	0	0	0	0	1	0	0	0	0	0	0	0	0	1	0	1
0	1	27	0	0	0	0	0	0	0	0	0	0	0	0	0	0	0	0	0	0	0	0	1
1	1	61	0	0	1	0	0	0	0	0	0	0	1	0	0	0	0	0	0	0	1	0	1
0	1	32	0	0	0	0	0	0	0	0	0	0	0	0	0	0	0	0	0	0	0	0	1
0	1	55	0	0	1	0	0	1	0	0	0	1	0	0	0	0	0	0	0	0	0	0	1
0	0	50	0	0	0	0	0	0	0	0	0	0	0	0	0	0	0	0	0	0	1	0	1
1	0	46	0	0	0	0	0	0	0	0	0	0	0	0	0	0	0	0	0	0	0	0	1
0	1	40	0	0	0	0	0	0	0	0	0	0	0	0	0	0	0	0	0	0	1	0	1
1	1	69	1	1	0	1	0	0	0	0	0	0	0	0	0	0	0	0	0	0	1	1	1
1	0	65	0	0	1	0	0	0	0	0	0	0	0	0	0	0	0	0	0	0	0	0	1
1	1	43	0	0	0	0	0	0	0	0	0	0	0	0	0	0	0	0	0	0	1	0	1
1	1	50	0	0	1	0	0	0	0	0	0	1	1	0	0	0	0	0	0	0	0	0	1
0	1	25	0	0	0	0	0	0	0	1	0	0	0	0	0	0	0	0	0	0	0	0	1
0	0	46	0	0	0	0	0	0	0	0	0	0	1	0	0	0	0	0	0	0	0	0	1
1	1	40	0	0	1	0	0	0	0	0	0	0	0	1	0	0	0	0	0	0	1	0	1
1	0	77	0	0	0	0	0	0	0	0	0	0	0	0	0	0	0	0	0	0	1	0	1
0	1	32	0	0	0	0	0	0	0	0	0	0	0	0	0	0	0	0	0	0	0	0	1
0	0	38	0	0	1	0	0	0	0	0	0	0	0	0	0	0	0	0	0	0	0	0	1
1	1	21	1	0	0	0	0	0	0	1	0	0	0	0	0	0	0	0	0	0	1	0	1
0	1	34	0	0	1	0	0	0	0	0	0	0	0	0	0	0	0	0	0	0	1	0	1
0	1	40	0	0	0	0	0	0	0	0	0	1	0	0	0	0	0	0	0	0	1	0	1
0	1	37	0	0	0	0	0	0	0	0	0	0	0	0	0	0	0	0	0	0	0	0	1
0	0	56	0	0	0	0	0	0	0	0	1	0	1	0	0	0	0	0	0	0	0	0	1
0	1	31	0	0	1	0	0	0	0	1	0	0	0	0	0	0	0	0	0	0	0	0	1
0	1	44	0	1	0	0	0	0	0	0	0	1	0	0	0	0	0	0	0	0	1	0	1
0	0	34	0	0	0	0	0	0	0	0	0	0	0	0	0	0	0	0	0	0	0	0	1
0	1	24	1	1	0	1	0	0	0	0	0	0	0	0	0	0	0	0	0	0	0	0	1
0	1	20	1	0	0	0	0	0	0	0	0	0	0	0	0	0	0	0	0	0	0	0	1
1	0	67	1	1	0	1	0	0	0	0	0	0	1	0	0	0	0	0	0	0	1	1	1
1	0	69	0	0	0	0	0	0	0	0	0	0	0	0	0	0	0	0	0	0	1	0	1
1	1	65	0	0	0	0	0	0	1	0	0	0	0	0	0	0	0	0	0	0	1	1	1
1	0	40	0	0	0	0	0	0	0	0	0	0	1	0	0	0	0	0	0	0	0	0	1
0	1	49	0	0	0	0	0	0	0	0	0	0	0	0	0	0	0	0	0	0	0	0	1
0	1	46	0	0	0	0	0	0	0	0	0	0	0	0	0	0	0	0	0	0	1	0	1
0	1	48	0	0	1	0	0	0	0	0	0	0	0	0	0	0	0	0	0	0	1	0	1
0	1	35	0	0	0	0	0	0	0	0	0	0	0	0	0	0	0	0	0	0	0	0	1
0	1	25	0	0	0	0	0	0	0	1	0	0	0	0	0	0	0	0	0	0	0	0	1
1	1	41	0	0	0	0	0	0	0	0	0	0	0	0	0	0	0	0	0	0	0	0	1
0	1	36	1	1	0	0	0	0	0	0	0	0	0	0	0	0	0	0	0	0	0	0	1
0	1	49	0	0	0	0	0	0	0	0	0	0	0	0	0	0	0	0	0	0	1	0	1
0	1	36	1	1	0	1	0	0	0	0	0	0	0	0	0	0	0	0	0	0	1	0	1
1	1	30	0	0	1	0	0	0	0	0	0	0	0	0	0	0	0	0	0	0	0	0	1
0	1	31	0	0	0	0	0	0	0	0	0	0	0	0	0	0	0	0	0	0	0	0	1
0	0	23	0	0	0	0	0	0	0	0	0	0	0	0	0	0	0	0	0	0	1	0	1
0	1	49	0	1	0	0	0	0	0	0	0	0	0	0	0	0	0	0	0	0	0	0	1
0	1	22	0	0	0	0	0	0	0	0	0	0	0	0	0	0	0	0	0	0	0	0	1
0	0	26	0	0	1	0	0	0	0	0	0	1	0	0	0	0	0	0	0	0	0	0	1
1	0	75	0	0	1	0	0	0	0	0	0	1	0	0	1	0	0	0	0	0	1	0	1
1	1	64	0	0	0	0	0	0	0	0	0	0	0	0	0	0	1	0	0	0	1	1	1
1	1	78	0	0	0	0	0	0	0	0	0	1	0	1	0	0	0	0	0	0	1	0	1
0	1	41	0	0	0	0	0	0	0	0	0	0	0	0	0	0	0	0	0	0	1	0	1
0	1	42	0	1	0	0	0	0	0	0	1	0	0	0	0	0	0	0	0	0	1	0	1
1	0	51	0	0	1	0	0	0	0	0	0	0	0	0	0	0	0	0	0	0	0	0	1
1	1	46	0	0	0	0	0	0	0	0	0	0	0	1	0	0	1	0	0	0	0	0	1
1	0	68	1	0	0	0	0	0	0	0	0	0	0	0	0	0	0	0	0	0	1	0	1
1	0	60	0	0	0	0	0	0	0	0	0	1	1	0	0	0	0	0	0	0	1	0	1
0	1	52	0	0	1	0	0	0	0	0	0	0	0	0	0	0	0	0	0	0	0	0	1
1	0	28	0	0	0	0	0	0	0	0	0	0	0	0	0	0	0	0	0	0	0	0	1
1	1	31	1	1	0	1	0	0	0	1	0	0	0	0	0	0	0	0	0	0	0	0	1
0	1	25	0	0	0	0	0	0	0	0	0	0	0	0	0	0	0	0	0	0	0	0	1
1	1	17	1	1	0	1	0	0	0	0	1	0	0	0	0	0	0	0	0	0	0	0	1
1	0	26	0	0	1	0	0	0	0	0	0	0	0	0	0	0	0	0	0	0	0	0	1
0	1	53	0	0	0	0	0	0	0	0	0	0	0	0	0	0	0	0	0	0	0	0	1
1	0	73	0	0	0	0	0	0	0	0	0	0	0	0	0	0	0	0	0	0	1	0	1
1	0	63	0	0	0	0	0	1	0	0	1	0	0	1	0	0	0	0	0	0	0	0	1
0	0	49	0	0	0	0	0	0	0	0	0	0	1	0	0	0	0	0	0	0	0	0	1
0	1	39	0	0	0	0	0	0	0	0	0	0	0	0	0	0	0	0	0	0	0	0	1
0	1	35	1	0	0	0	0	0	0	0	0	0	0	0	0	0	0	0	0	0	0	0	1
0	1	46	0	1	0	0	0	0	0	0	0	1	1	0	0	0	0	0	0	0	1	0	1
1	1	17	0	0	0	0	0	0	0	1	0	0	0	0	0	0	0	0	0	0	1	0	1
0	1	32	0	0	0	0	0	0	0	0	0	0	0	0	0	0	0	0	0	0	0	0	1
0	1	76	0	0	1	0	0	0	0	0	0	0	0	1	0	0	0	0	0	0	1	0	1
0	1	22	1	1	0	0	0	0	0	0	0	1	1	0	0	0	0	0	0	0	0	0	1
1	1	68	0	0	0	0	0	0	0	0	0	0	0	0	0	0	0	0	0	0	1	0	1
0	1	18	0	0	0	0	0	0	0	0	0	0	0	0	0	0	0	0	0	0	0	0	1
1	0	80	0	0	0	0	0	0	0	0	0	0	1	0	0	0	0	0	1	0	1	1	1
0	1	25	1	1	0	1	0	0	0	0	0	0	0	0	0	0	0	0	0	0	0	0	1
0	1	27	1	0	0	0	0	0	0	0	0	0	0	0	0	0	0	0	0	0	0	0	1
0	1	25	0	0	0	0	0	0	0	0	0	0	0	0	0	0	0	0	0	0	0	0	1
0	1	32	0	0	0	0	0	0	0	0	0	0	0	0	0	0	0	0	0	0	0	0	1
0	1	33	0	0	0	0	0	0	0	0	0	0	0	0	0	0	0	0	0	0	0	0	1
1	0	26	0	0	1	0	0	0	0	0	0	0	0	0	0	0	0	0	0	0	0	0	1
0	1	36	0	0	0	1	0	0	0	0	0	0	0	0	0	0	0	0	0	0	1	0	1
0	1	35	0	0	1	0	0	0	0	0	0	0	0	0	0	0	0	0	0	0	0	0	1
1	0	49	0	0	1	0	0	0	0	0	0	0	1	0	0	0	0	0	0	0	0	0	1
1	1	54	1	1	0	1	0	0	0	0	0	0	0	1	0	0	0	0	0	0	1	1	1
1	1	37	0	0	0	0	0	0	0	0	0	0	0	0	0	0	0	0	0	0	0	0	1
0	1	31	0	0	0	0	0	0	0	1	0	0	0	0	0	0	0	0	0	0	1	0	1
0	1	25	1	0	0	0	0	0	0	0	0	0	0	0	0	0	0	0	0	0	1	0	1
0	1	56	1	1	0	1	0	0	0	0	0	0	1	0	0	0	0	0	0	0	1	1	1
0	1	54	0	0	0	1	0	0	0	0	0	1	0	0	0	0	0	0	0	0	1	0	1
1	1	79	0	0	0	0	0	1	0	0	0	0	0	0	1	1	0	0	0	0	1	0	1
0	1	42	0	0	0	0	0	0	0	0	0	0	0	0	0	0	0	0	0	0	1	0	1
0	1	30	0	1	0	0	0	0	0	0	0	0	0	0	0	0	0	0	0	0	0	0	1
1	1	63	1	0	0	0	0	0	0	0	1	0	0	0	0	0	0	0	0	0	0	0	1
0	1	32	0	1	0	0	0	0	0	0	0	0	0	0	0	0	0	0	0	0	1	0	1
0	1	35	0	0	0	0	0	0	0	0	0	0	0	0	0	0	0	0	0	0	0	0	1
1	1	80	0	0	0	0	0	0	0	0	0	0	0	0	0	0	0	0	0	0	0	0	1
0	1	33	0	0	0	0	0	0	0	0	0	0	0	0	0	0	0	0	0	0	1	0	1
1	1	51	0	0	0	0	0	0	0	0	0	0	0	0	0	0	0	0	0	1	1	0	1
1	0	29	0	0	0	0	0	0	0	0	0	0	0	0	0	0	0	0	0	0	0	0	1
1	0	35	0	0	0	0	0	0	0	0	0	0	0	0	0	0	0	0	0	0	1	0	1
0	1	38	0	0	0	0	0	0	0	0	0	0	0	0	0	0	0	0	0	0	1	0	1
0	0	44	0	0	0	0	0	0	0	0	0	0	0	0	0	0	0	0	0	0	0	0	1
0	1	31	1	1	0	1	0	0	0	0	0	0	0	0	0	0	0	0	0	0	0	0	1
0	1	46	0	0	0	0	0	0	0	0	0	0	0	0	0	0	0	0	0	0	0	0	1
1	0	52	0	0	0	0	0	0	0	0	1	0	0	0	0	0	0	0	0	0	1	0	1
0	1	37	0	0	0	1	0	0	0	0	0	0	0	0	0	0	0	0	0	0	0	0	1
0	1	47	0	0	0	0	0	0	0	0	0	1	0	1	0	0	0	0	0	0	1	0	1
0	1	21	0	0	0	0	0	0	0	0	0	0	0	0	0	0	0	0	0	0	0	0	1
1	1	41	0	0	0	0	0	0	0	0	0	1	0	0	0	0	0	0	0	0	0	0	1
1	1	83	1	1	0	1	0	1	0	0	0	0	0	0	0	0	0	0	0	0	0	0	1
0	1	27	1	1	0	1	0	0	0	0	0	0	0	0	0	0	0	0	0	0	1	0	1
1	0	31	0	0	1	0	1	1	0	0	0	1	0	0	0	0	0	0	0	0	1	0	1
0	1	48	1	1	0	1	0	0	0	0	0	0	1	0	0	0	0	0	0	0	0	0	1
0	1	19	0	0	0	0	0	0	0	0	0	0	0	0	0	0	0	0	0	0	0	0	1
0	1	31	0	0	0	0	0	0	0	0	0	0	0	0	0	0	0	0	0	0	1	0	1
0	1	30	1	0	0	0	0	0	0	0	0	1	0	0	0	0	0	0	0	0	0	0	1
1	0	33	0	0	0	0	0	0	0	1	0	0	0	0	0	0	0	0	0	0	0	0	1
1	0	27	0	0	0	0	0	0	0	0	0	0	0	0	0	0	0	0	0	0	1	0	1
1	0	22	0	0	0	0	0	0	0	0	0	0	0	0	0	0	0	0	0	0	0	0	1
0	1	59	0	0	0	0	0	0	0	0	0	0	0	0	0	0	0	0	0	0	1	0	1
1	1	57	0	0	0	0	0	0	0	0	0	0	1	0	0	0	0	0	0	0	1	0	1
0	1	23	0	0	0	0	0	0	0	0	0	0	0	0	0	0	0	0	0	0	1	0	1
1	0	47	0	0	0	0	0	0	0	0	1	0	1	0	0	0	0	0	0	0	1	0	1
0	1	34	1	1	0	1	0	0	0	0	0	1	0	0	0	0	0	0	0	0	1	0	1
0	1	30	0	0	0	0	0	0	0	0	0	0	0	0	0	0	0	0	0	0	0	0	1
1	0	33	1	0	1	0	0	1	0	0	0	0	0	0	0	0	0	0	0	0	0	0	1
0	0	25	0	0	0	0	0	0	0	1	0	0	0	0	0	0	0	0	0	0	0	0	1
0	0	21	1	0	0	0	0	0	0	0	0	0	0	0	0	0	0	0	0	0	0	0	1
0	1	20	0	0	1	0	0	0	0	1	0	0	0	0	0	0	0	0	0	0	0	0	1
0	1	34	0	0	0	0	0	0	0	1	0	0	1	0	0	0	0	0	0	0	0	0	1
1	1	16	0	0	0	0	0	0	0	0	0	1	0	0	0	0	0	0	0	0	0	0	1
1	1	72	0	0	0	0	0	1	0	0	0	0	0	0	0	0	0	0	0	0	0	0	1
0	0	22	0	0	0	0	0	0	0	1	0	0	0	0	0	0	0	0	0	0	0	0	1
0	0	30	0	0	0	0	0	0	0	0	0	0	1	0	0	0	0	0	0	0	1	0	1
1	0	31	0	0	1	0	1	1	0	0	0	0	0	0	0	0	0	0	0	0	0	0	1
0	1	31	0	0	0	0	0	0	0	0	0	0	1	0	0	0	0	0	0	0	0	0	1
0	1	23	0	0	0	0	0	0	0	0	0	1	0	0	0	0	0	0	0	0	0	0	1
0	1	46	1	0	0	1	0	0	0	0	0	0	1	0	0	0	0	0	0	0	1	0	1
0	1	26	0	0	0	0	0	0	0	0	0	0	0	0	0	0	0	0	0	0	0	0	1
0	1	40	0	0	0	0	0	0	0	0	0	0	0	0	0	0	0	0	0	0	0	0	1
0	1	32	0	0	0	0	0	0	0	0	0	0	0	0	0	0	0	0	0	0	0	0	1
1	1	56	0	0	0	0	0	0	0	0	0	0	0	1	0	0	0	0	0	0	1	1	1
1	1	21	0	0	0	0	0	0	0	1	0	0	0	0	0	0	0	0	0	0	0	0	1
0	1	19	1	1	0	1	0	0	0	1	0	0	0	0	0	0	0	0	0	0	1	0	1
1	1	42	1	1	0	1	0	0	0	0	0	0	0	0	0	0	0	1	0	0	1	1	1
1	0	73	0	0	0	0	0	0	1	0	0	0	1	0	0	0	1	0	0	0	1	1	1
0	1	22	0	1	0	0	0	0	0	0	0	0	0	0	0	0	0	0	0	0	0	0	1
1	0	58	0	0	0	0	0	0	0	0	0	0	0	1	0	0	0	0	0	0	0	0	1
0	1	33	0	0	0	0	0	0	0	1	0	0	0	0	0	0	0	0	0	0	0	0	1
1	0	77	0	0	0	0	0	0	0	0	0	0	0	0	0	0	0	0	0	1	0	0	1
0	0	25	0	0	1	0	0	0	0	0	0	0	0	0	0	0	0	0	0	0	0	0	1
0	1	54	0	0	0	0	0	0	0	0	0	0	0	0	0	0	0	0	0	0	0	0	1
0	1	29	0	0	0	0	0	0	0	0	0	0	0	0	0	0	0	0	0	0	1	0	1
0	1	55	0	0	0	0	0	0	0	1	0	0	0	0	0	0	0	0	0	0	0	0	1
0	1	22	0	0	0	0	0	0	0	1	0	0	0	0	0	0	0	0	0	0	0	0	1
0	1	31	1	1	0	1	0	0	0	0	0	0	0	0	0	0	0	0	0	0	0	0	1
1	1	73	0	0	0	0	0	0	0	0	0	0	1	0	0	0	0	0	0	0	0	0	1
0	1	31	0	0	1	0	0	0	0	0	0	0	0	0	0	0	0	0	0	0	0	0	1
0	1	23	1	0	0	0	0	0	0	0	0	0	0	0	0	0	0	0	0	0	0	0	1
0	1	63	0	0	0	0	0	0	0	0	1	0	1	0	0	0	0	0	0	0	0	0	1
0	1	32	0	0	0	0	0	0	0	0	0	0	0	0	0	0	0	0	0	0	0	0	1
0	0	40	0	0	1	0	0	0	0	0	0	0	0	0	0	0	0	0	0	0	0	0	1
1	1	65	0	0	1	0	0	0	0	0	0	0	0	0	0	0	0	0	0	0	0	0	1
0	1	26	0	0	0	0	0	0	0	0	0	0	0	0	0	0	0	0	0	0	0	0	1
0	1	27	0	0	0	1	0	0	0	0	0	0	0	0	0	0	0	0	0	0	0	0	1
1	1	23	0	0	0	0	0	0	0	0	0	0	0	0	0	0	0	0	0	0	0	0	1
1	0	65	0	1	0	0	0	0	0	0	1	0	0	0	0	0	0	0	0	0	1	1	1
1	0	47	0	0	0	0	0	0	0	0	0	0	1	0	0	0	0	0	0	0	1	0	1
0	1	48	0	0	0	0	0	0	0	1	0	0	0	0	0	0	0	0	0	0	0	0	1
1	0	53	0	0	1	0	0	0	0	0	0	1	0	0	0	0	0	0	0	0	1	0	1
0	0	21	0	0	0	0	0	0	0	0	1	0	0	0	0	0	0	0	0	0	0	0	1
0	1	21	0	0	1	0	0	0	0	0	0	0	0	0	0	0	0	0	0	0	1	0	1
0	1	34	0	0	0	1	0	0	0	0	0	0	0	0	0	0	0	0	0	0	0	0	1
0	1	58	0	0	1	0	0	0	0	0	0	0	0	0	0	0	0	0	0	0	0	0	1
1	1	31	0	0	1	0	0	0	0	0	0	1	0	0	0	0	0	0	0	0	0	0	1
0	1	21	1	1	0	1	0	0	0	1	0	0	0	0	0	0	0	0	0	0	0	0	1
1	0	77	0	0	0	0	0	0	0	0	0	0	1	0	0	0	0	0	0	0	1	0	1
0	1	30	0	1	0	0	0	0	0	0	0	0	0	0	0	0	0	0	0	0	0	0	1
1	1	47	0	0	0	0	0	0	0	0	0	0	0	0	0	0	0	0	0	0	1	0	1
1	1	49	0	0	0	0	0	0	1	0	0	0	0	0	0	0	0	0	0	0	1	0	1
0	1	22	1	0	0	0	0	0	0	0	0	0	0	0	0	0	0	0	0	0	0	0	1
1	1	70	0	0	1	0	0	0	0	0	0	0	0	0	0	0	0	0	0	0	0	0	1
0	1	29	0	0	0	0	0	0	0	0	0	0	0	0	0	0	0	0	0	0	0	0	1
1	1	48	0	0	0	0	0	0	0	0	0	0	0	0	0	0	0	0	0	0	1	1	1
0	1	49	0	0	1	0	0	0	0	0	0	0	0	0	0	0	0	0	0	0	0	0	1
0	1	29	0	0	0	0	0	0	0	0	0	0	0	0	0	0	0	0	0	0	0	0	1
1	0	46	0	0	0	0	0	0	0	0	0	0	1	0	0	0	0	0	0	0	0	0	1
0	1	33	0	0	0	0	0	0	0	0	0	0	0	0	0	0	0	0	0	0	0	0	1
0	1	21	0	1	0	0	0	0	0	0	0	0	0	0	0	0	0	0	0	0	0	0	1
0	1	31	1	0	0	1	0	0	0	0	0	0	0	0	0	0	0	0	0	0	0	0	1
0	1	27	0	0	0	0	0	0	0	0	0	0	1	0	0	0	0	0	0	0	0	0	1
0	1	43	0	0	0	0	0	0	0	0	0	0	0	0	0	0	0	0	1	0	0	0	1
0	1	52	0	0	1	0	0	0	0	0	1	0	0	1	0	0	0	0	0	0	0	0	1
1	0	52	0	0	0	0	0	0	0	0	1	0	0	0	0	0	0	0	0	0	0	0	1
1	1	78	1	0	0	0	0	0	0	0	0	0	1	0	0	0	0	0	0	0	1	0	1
0	1	23	1	0	0	0	0	0	0	1	0	0	0	0	0	0	0	0	0	0	1	0	1
0	1	30	1	1	0	1	0	0	0	0	0	0	0	0	0	0	0	0	0	0	0	0	1
0	1	42	0	0	0	0	0	0	0	0	0	0	0	0	0	0	0	0	0	0	0	0	1
1	0	92	0	0	0	0	0	0	0	0	0	0	1	0	0	0	0	0	0	0	1	0	1
1	1	58	0	0	0	1	0	0	0	0	0	0	0	0	0	0	0	0	0	0	0	0	1
0	1	41	0	0	0	0	0	0	0	0	0	0	0	0	0	0	0	0	0	0	1	0	1
0	1	26	0	0	0	0	0	0	0	0	0	0	0	0	0	0	0	0	0	0	0	0	1
0	1	33	1	1	0	1	0	0	0	0	1	0	0	0	0	0	0	0	0	0	0	0	1
0	1	22	1	0	0	0	0	0	0	1	0	0	0	0	0	0	0	0	0	0	0	0	1
0	1	30	0	0	0	0	0	0	0	0	0	0	0	0	0	0	0	0	0	0	0	0	1
0	1	48	0	0	0	0	0	0	0	0	0	0	0	0	0	0	0	0	0	0	0	0	1
0	1	28	0	0	0	0	0	0	0	0	0	0	0	0	0	0	0	0	0	0	0	0	1
0	1	33	1	1	0	1	0	0	0	0	0	0	0	0	0	0	0	0	0	0	1	0	1
0	1	19	1	1	0	1	0	0	0	0	1	0	0	0	0	0	0	0	0	0	0	0	1
0	1	45	0	0	0	0	0	0	0	0	0	0	0	0	0	0	0	0	0	0	1	0	1
0	0	52	0	0	0	0	0	0	0	0	0	0	1	0	0	0	0	0	0	0	1	0	1
1	1	61	0	0	0	0	0	0	0	0	0	0	0	0	0	0	0	0	0	0	0	0	1
0	1	22	0	0	0	0	0	0	0	0	0	0	0	0	0	0	0	0	0	0	0	0	1
0	1	48	1	1	0	0	0	0	0	0	0	0	0	0	0	0	0	0	0	0	0	0	1
1	1	76	0	0	0	0	0	0	0	0	0	0	1	0	0	0	0	0	0	0	1	1	1
0	0	51	0	0	0	0	0	0	0	0	0	0	0	1	0	0	0	0	0	0	1	0	1
0	1	23	0	0	0	0	0	0	0	0	0	0	0	0	0	0	0	0	0	0	0	0	1
0	1	22	0	1	0	0	0	0	0	0	0	0	0	0	0	0	0	0	0	0	0	0	1
1	0	77	0	0	1	0	0	0	0	0	0	1	0	0	0	0	0	0	0	0	1	1	1
0	0	49	0	0	0	0	0	0	0	0	0	0	0	0	0	0	0	0	0	0	0	0	1
1	1	23	0	0	0	1	0	0	0	1	0	0	1	1	0	0	0	0	0	0	1	0	1
1	0	69	0	0	0	0	0	0	0	0	0	0	0	0	0	0	0	0	0	0	0	0	1
0	1	43	0	0	0	0	0	0	0	0	0	0	0	0	0	0	0	0	0	0	0	0	1
0	0	46	0	0	0	0	0	0	0	0	0	0	0	0	0	0	0	0	0	0	0	0	1
1	1	61	0	0	0	0	0	0	0	0	1	0	1	0	0	0	0	0	0	0	1	0	1
1	1	42	0	0	0	0	0	0	0	0	0	1	0	0	0	0	0	0	0	0	1	1	1
1	0	53	0	0	1	0	0	0	0	0	0	0	0	0	0	0	0	0	0	0	0	0	1
0	1	42	0	0	0	0	0	0	0	0	0	0	0	0	0	0	0	0	0	0	0	0	1
1	0	59	0	0	0	0	0	0	0	0	0	0	1	0	0	0	0	0	0	0	1	1	1
0	1	23	0	0	0	1	0	0	0	0	0	0	0	0	0	0	0	0	0	0	0	0	1
0	1	18	0	0	0	0	0	0	0	0	0	0	0	0	0	0	0	0	0	0	0	0	1
0	1	28	0	0	0	0	0	0	0	0	0	0	0	0	0	0	0	0	0	0	1	0	1
0	1	22	0	0	0	0	0	0	0	1	0	0	0	0	0	0	0	0	0	0	0	0	1
0	1	21	0	1	0	0	0	0	0	0	0	0	0	0	0	0	0	0	0	0	0	0	1
0	1	32	0	0	0	0	0	0	0	0	0	0	0	0	0	0	0	0	0	0	0	0	1
1	0	61	0	0	0	0	0	0	0	0	0	0	0	0	0	0	0	0	0	0	0	0	1
0	1	55	0	0	0	0	0	0	0	0	0	0	0	1	0	0	0	0	0	0	1	0	1
0	1	23	1	0	0	0	0	0	0	0	0	1	0	0	0	0	0	0	0	0	0	0	1
0	1	28	0	0	0	0	0	0	0	0	0	1	0	0	0	0	0	0	0	0	0	0	1
0	1	34	0	0	0	0	0	0	0	0	0	0	1	0	0	0	0	0	0	0	0	0	1
0	1	53	1	1	0	1	0	1	0	0	0	0	0	0	0	0	0	0	0	0	1	0	1
1	0	78	0	0	0	0	0	0	1	0	0	0	1	0	0	0	0	0	0	0	1	1	1
1	0	55	0	0	0	0	0	0	0	0	1	0	0	0	0	0	0	1	0	0	1	1	1
1	0	76	1	0	0	0	0	0	0	0	0	0	0	0	0	0	0	0	0	0	1	1	1
0	1	34	0	0	0	0	0	0	0	0	0	0	0	0	0	0	0	0	0	0	0	0	1
1	1	26	0	0	0	0	0	0	0	0	0	0	1	0	0	0	0	0	0	0	0	0	1
0	1	23	0	0	0	0	0	0	0	0	0	0	0	0	0	0	0	0	0	0	0	0	1
1	1	42	0	0	0	1	0	0	0	0	0	0	0	0	0	0	0	0	0	0	1	1	1
0	1	59	0	0	0	0	0	0	0	0	0	0	0	0	0	0	0	0	0	0	1	0	1
0	1	33	0	0	0	0	0	0	0	0	0	1	1	0	0	0	0	0	0	0	1	0	1
0	1	45	0	0	0	0	0	0	0	0	0	0	0	0	0	0	0	0	0	0	0	0	1
0	1	24	0	0	0	0	0	0	0	0	0	0	0	0	0	0	0	0	0	0	0	0	1
1	0	34	0	0	1	0	0	0	0	0	0	0	1	0	0	0	0	0	0	0	1	0	1
1	1	75	0	0	0	0	0	0	0	0	0	0	0	0	0	0	0	0	0	1	0	0	1
1	1	25	0	0	1	0	0	0	0	0	0	1	0	0	0	0	0	0	0	0	0	0	1
0	1	30	0	1	0	0	0	0	0	0	0	0	0	0	0	0	0	0	0	0	0	0	1
0	1	73	0	0	0	0	0	0	0	0	0	0	0	0	0	0	0	0	0	0	1	0	1
1	0	73	0	0	0	0	0	0	0	0	0	0	0	0	0	0	1	0	0	0	1	0	1
0	1	33	0	0	0	0	0	0	0	0	0	0	0	0	0	0	0	0	0	0	0	0	1
1	0	72	1	0	0	0	0	0	0	1	0	0	0	0	0	0	0	0	0	0	1	0	1
0	1	48	0	0	0	1	0	0	0	0	0	0	0	0	0	0	0	0	0	0	0	0	1
1	1	54	1	0	0	0	0	0	0	0	0	0	0	0	0	0	0	0	0	1	0	0	1
1	0	51	0	0	0	0	0	0	0	0	0	0	0	0	0	0	0	1	0	0	1	1	1
0	1	52	1	1	0	1	0	0	0	0	0	0	0	0	0	0	0	0	0	0	1	0	1
0	0	50	0	0	1	0	0	0	0	0	0	1	0	0	0	0	0	0	0	0	0	0	1
1	0	31	0	0	0	0	0	0	0	0	0	0	0	0	0	0	0	0	0	0	0	0	1
1	0	46	1	1	0	1	0	0	0	0	0	0	1	0	0	0	0	0	0	0	1	1	1
0	1	26	1	1	0	1	0	0	0	0	0	0	0	0	0	0	0	0	0	0	1	0	1
1	0	66	0	0	1	0	0	0	0	0	0	0	0	0	0	0	0	0	0	0	1	0	1
0	1	31	1	1	0	0	0	0	0	0	0	0	0	0	0	0	0	0	0	0	0	0	1
0	1	31	0	0	0	0	0	0	0	0	0	0	0	0	0	0	0	0	0	0	0	0	1
0	1	43	0	0	0	0	0	0	0	0	0	0	1	0	0	0	0	0	0	0	0	0	1
0	1	36	0	0	0	0	0	0	0	0	0	0	0	0	0	0	0	0	0	0	0	0	1
0	0	35	0	0	0	0	0	0	0	0	0	0	1	0	0	0	0	0	0	0	0	0	1
0	0	25	0	0	1	0	0	0	0	0	0	1	0	0	0	0	0	0	0	0	0	0	1
1	0	49	0	0	1	0	0	0	0	0	0	0	0	0	0	0	0	0	0	0	1	0	1
1	1	35	0	0	0	0	0	1	0	0	0	0	0	0	0	0	0	0	0	0	1	0	1
0	1	35	0	0	0	0	0	0	0	0	0	0	0	0	0	0	0	0	0	0	0	0	1
1	1	74	0	0	0	0	0	0	0	0	0	0	0	0	0	0	0	1	0	0	1	1	1
0	1	25	0	0	0	0	0	0	0	0	0	1	0	0	0	0	0	0	0	0	0	0	1
1	0	80	0	0	0	0	0	0	0	1	0	0	0	0	1	0	0	0	0	0	1	0	1
0	1	22	0	0	0	0	0	1	0	0	0	0	0	0	0	0	0	0	0	0	0	0	1
1	1	56	0	0	0	0	0	0	0	1	0	0	0	1	0	0	0	0	0	0	1	0	1
1	1	35	0	0	0	0	0	0	0	0	0	0	0	0	0	0	0	0	0	0	0	0	1
0	1	41	1	1	0	0	0	0	0	0	0	0	0	0	0	0	0	0	0	0	0	0	1
0	1	47	1	0	0	0	0	0	0	1	0	0	0	0	0	0	0	0	0	0	0	0	1
0	1	34	0	0	0	0	0	0	0	0	0	0	0	0	0	0	0	0	0	0	0	0	1
0	1	29	0	1	0	0	0	0	0	0	0	0	0	0	0	0	0	0	0	0	0	0	1
1	0	64	0	0	1	0	0	0	0	0	0	0	0	0	0	0	0	0	0	0	0	0	1
1	1	77	0	0	0	0	0	0	0	0	0	0	0	0	0	0	0	1	0	0	1	1	1
0	1	29	0	0	0	0	0	0	0	0	0	0	0	0	0	0	0	0	0	0	0	0	1
1	0	60	0	0	0	0	0	0	0	0	0	0	0	0	0	0	0	0	0	0	1	0	1
0	0	30	1	0	0	1	0	0	0	0	0	0	0	0	0	0	0	0	0	0	0	0	1
0	0	29	0	0	0	0	0	0	0	1	0	0	0	0	0	0	0	0	0	0	1	0	1
0	1	42	0	0	0	0	0	0	0	0	0	0	0	0	0	0	0	0	0	0	1	0	1
1	0	68	0	0	0	0	0	0	0	0	0	0	0	0	0	0	0	0	0	0	1	0	1
0	1	33	0	0	0	0	0	0	0	0	0	0	0	0	0	0	0	0	0	0	1	0	1
1	0	36	0	0	1	0	0	0	0	0	0	1	0	1	0	0	0	0	0	0	0	0	1
0	1	51	1	1	0	1	0	0	0	0	0	0	0	0	0	0	0	0	0	0	0	0	1
0	1	37	0	0	1	0	0	0	0	0	0	0	0	0	0	0	0	0	0	0	0	0	1
0	1	38	0	0	0	0	0	0	0	0	0	0	0	0	0	0	0	0	0	0	0	0	1
1	1	22	1	0	0	1	0	0	0	0	0	1	0	1	0	0	0	0	0	0	0	0	1
0	1	59	0	0	0	0	0	0	0	0	0	0	0	1	0	0	0	0	0	0	0	0	1
0	1	36	0	0	0	0	0	0	0	0	0	0	0	0	0	0	1	0	0	0	0	0	1
0	1	31	0	1	0	0	0	0	0	0	0	0	0	0	0	0	0	0	0	0	0	0	1
1	0	48	0	0	0	0	0	0	0	0	0	0	0	0	0	0	0	0	0	0	0	0	1
1	0	35	0	0	1	0	0	0	0	0	0	0	0	0	0	0	0	0	0	0	0	0	1
1	0	72	0	0	0	0	0	0	0	0	0	0	0	0	0	0	0	0	0	0	1	0	1
0	1	21	0	0	0	0	0	0	0	1	0	0	0	0	0	0	0	0	0	0	1	0	1
0	1	65	0	0	1	0	0	0	0	0	0	0	0	0	0	0	0	0	0	0	0	0	1
1	0	49	0	0	0	0	0	0	0	0	0	1	0	0	0	0	0	0	0	0	1	0	1
0	0	31	0	0	0	0	0	0	0	0	0	1	0	0	0	0	0	0	0	0	0	0	1
0	1	25	0	1	0	0	0	0	0	0	0	0	1	0	0	0	0	0	0	0	0	0	1
0	1	49	1	0	0	0	0	0	0	0	0	0	0	0	0	0	0	0	0	0	0	0	1
1	1	21	0	0	0	0	0	0	0	0	0	0	0	0	0	0	0	0	0	0	1	0	1
0	1	53	0	0	0	0	0	0	0	0	0	0	0	0	0	0	0	0	0	0	1	0	1
0	1	31	0	0	0	1	0	0	0	0	0	0	0	0	0	0	0	0	0	0	1	1	1
0	1	46	0	0	0	1	0	0	0	0	0	1	0	0	0	0	0	0	0	0	0	0	1
0	1	53	1	1	0	0	0	0	0	0	0	0	0	0	0	0	0	0	0	0	1	0	1
0	1	40	0	0	0	0	0	0	0	0	0	0	1	0	0	0	0	0	0	0	1	0	1
0	1	38	0	0	0	0	0	0	0	0	0	0	0	0	0	0	0	0	0	0	0	0	1
0	1	26	1	1	0	1	0	0	0	0	0	0	0	0	0	0	0	0	0	0	1	0	1
0	0	32	0	0	0	0	0	0	0	0	0	0	0	0	0	0	0	0	0	0	0	0	1
1	0	66	0	0	0	0	0	0	0	0	0	0	1	0	0	0	0	0	0	0	1	0	1
1	1	68	0	0	0	0	0	0	0	1	0	0	1	0	1	0	0	0	0	0	1	1	1
1	0	73	0	1	0	0	0	0	0	0	1	0	0	0	0	0	0	0	0	0	0	0	1
0	1	24	0	0	0	0	0	0	0	0	0	0	0	0	0	0	0	0	0	0	0	0	1
0	1	26	1	1	0	1	0	0	0	0	0	0	0	0	0	0	0	0	0	0	0	0	1
1	1	76	0	0	1	0	0	0	0	1	0	0	0	0	0	0	0	0	0	0	1	1	1
1	1	65	0	0	1	0	0	0	0	0	0	0	0	0	0	0	0	0	0	0	1	0	1
0	1	24	0	0	0	0	0	0	0	0	0	0	1	0	0	0	0	0	0	0	0	0	1
0	1	34	0	0	0	0	0	0	0	0	0	0	0	0	0	0	0	0	0	0	0	0	1
1	0	21	1	0	1	0	0	0	0	0	0	0	0	0	0	0	0	0	0	0	0	0	1
0	1	19	0	0	0	0	0	0	0	0	0	0	0	0	0	0	0	0	0	0	0	0	1
0	1	36	0	0	1	0	0	0	0	0	0	0	0	1	0	0	0	0	0	0	0	0	1
0	1	59	0	0	0	0	0	0	0	0	0	0	0	0	0	0	0	0	0	0	0	0	1
0	1	24	0	0	0	0	0	0	0	0	0	0	0	0	0	0	0	0	0	0	0	0	1
0	1	31	0	0	0	0	0	0	0	0	0	0	1	0	0	0	0	0	0	0	1	0	1
1	0	54	0	0	0	0	0	0	0	0	0	0	1	0	0	0	0	0	0	0	1	0	1
0	1	49	0	0	0	0	0	0	0	0	0	1	0	0	0	0	0	0	0	0	0	0	1
1	0	89	0	0	0	0	0	0	0	0	0	0	1	0	0	0	0	0	0	0	1	0	1
0	1	31	0	0	0	0	0	0	0	1	0	0	0	0	0	0	0	0	0	0	0	0	1
0	1	40	1	1	0	1	0	0	0	0	0	0	0	0	0	0	0	0	0	0	0	0	1
0	1	27	1	1	0	1	0	0	0	0	0	0	0	0	0	0	0	0	0	0	0	0	1
0	0	52	0	0	0	0	0	0	0	0	0	0	0	0	0	0	0	0	0	1	1	0	1
0	1	36	0	0	0	0	0	0	0	0	0	0	0	0	0	0	0	0	0	0	1	0	1
0	1	20	1	1	0	1	0	1	0	0	0	0	0	0	0	0	0	0	0	0	0	0	1
0	1	49	0	0	0	0	0	0	0	0	0	0	0	0	0	0	0	0	0	0	0	0	1
1	0	60	1	0	1	0	0	0	0	0	0	0	0	0	0	0	0	0	0	0	1	0	1
0	1	20	1	0	0	0	0	0	0	0	0	0	1	0	0	0	0	0	0	0	0	0	1
0	1	39	0	0	0	0	0	0	0	0	0	0	0	0	0	0	0	0	0	0	0	0	1
1	0	53	0	0	1	0	0	0	0	1	0	0	0	0	0	0	0	0	0	0	1	0	1
1	0	66	0	0	1	0	0	0	0	0	0	0	0	0	0	0	0	0	0	0	1	0	1
1	1	60	1	1	0	1	0	0	1	0	0	0	0	1	0	0	0	0	0	0	1	1	1
0	1	22	0	0	0	0	0	0	0	0	0	0	1	0	0	0	0	0	0	0	1	0	1
1	1	66	0	0	0	0	0	0	0	0	0	0	0	0	0	0	0	0	0	0	1	0	1
0	1	24	0	0	0	0	0	0	0	0	0	1	0	0	0	0	0	0	0	0	1	0	1
0	1	34	0	0	0	0	0	0	0	0	0	0	0	0	0	0	0	0	0	0	0	0	1
0	1	36	0	0	0	0	0	0	0	0	0	0	0	0	0	0	0	0	0	0	1	1	1
1	0	29	0	0	1	0	0	0	0	0	0	0	1	0	0	0	0	0	0	0	0	0	1
0	1	31	0	0	0	0	0	0	0	0	0	0	0	0	0	0	0	0	0	0	0	0	1
0	1	22	1	0	0	0	0	0	0	0	0	1	0	0	0	0	0	0	0	0	0	0	1
1	0	74	0	0	1	0	0	0	0	0	0	0	0	0	1	0	0	0	0	0	1	0	1
0	1	19	0	0	0	0	0	0	0	1	0	0	0	0	0	0	0	0	0	0	0	0	1
0	1	30	0	0	0	0	0	0	0	0	0	0	0	0	0	0	0	0	0	0	0	0	1
1	0	36	0	0	0	0	0	0	0	0	0	0	0	0	0	0	0	0	0	0	1	0	1
1	1	52	0	0	0	0	0	0	0	0	0	0	1	0	0	0	0	0	0	0	1	0	1
0	1	28	0	0	0	0	0	0	0	1	0	0	0	0	0	0	0	0	0	0	0	0	1
0	0	39	0	0	0	0	0	0	0	0	0	0	0	0	0	0	0	0	0	0	0	0	1
1	0	68	0	0	0	0	0	0	0	0	0	0	0	0	0	0	1	0	0	0	1	0	1
1	0	34	0	0	0	0	0	0	0	0	0	0	0	0	0	0	0	0	0	0	1	0	1
1	0	51	0	0	0	0	0	0	0	0	0	0	0	0	0	0	0	0	0	0	0	0	1
1	1	82	0	0	0	0	0	0	0	1	0	0	0	0	0	0	0	0	0	0	1	0	1
0	1	30	0	0	0	0	0	0	0	0	0	0	0	0	0	0	0	0	0	0	1	0	1
0	1	28	0	0	0	0	0	0	0	0	0	0	0	0	0	0	0	0	0	0	0	0	1
1	0	57	0	0	0	0	0	0	0	0	0	0	1	0	0	0	0	0	0	0	0	0	1
0	1	53	0	0	0	0	0	0	0	0	0	0	0	1	0	0	0	0	0	0	0	0	1
1	1	79	0	0	0	0	0	0	0	0	0	0	1	0	0	0	0	0	0	1	0	0	1
1	0	63	0	0	1	0	0	0	0	0	0	0	0	0	0	0	0	0	0	0	1	0	1
0	1	23	1	1	0	1	0	0	0	0	0	0	0	0	0	0	0	0	0	0	0	0	1
0	1	33	0	0	0	0	0	1	0	0	0	0	0	0	0	0	0	0	0	0	1	0	1
0	1	25	0	0	0	0	0	0	0	0	0	0	0	0	0	0	0	0	0	0	1	0	1
1	0	68	0	0	0	0	0	0	0	0	0	0	0	0	0	0	0	0	0	0	0	0	1
1	0	68	0	0	0	0	0	0	0	0	0	0	0	0	0	0	0	0	0	0	1	0	1
1	1	74	0	0	0	0	0	0	1	0	0	0	0	0	0	0	0	0	0	0	0	0	1
1	0	56	0	0	1	0	0	0	0	0	0	0	0	0	0	0	0	0	0	0	0	0	1
1	0	36	0	0	0	0	0	0	0	0	0	0	1	0	0	0	0	0	0	0	0	0	1
1	1	68	0	0	0	0	0	0	0	0	0	1	0	0	0	0	0	0	0	0	1	0	1
0	1	39	1	0	0	0	0	0	0	0	0	0	0	0	0	0	0	0	0	0	1	0	1
0	1	21	0	0	1	0	0	0	0	0	0	1	0	0	0	0	0	0	0	0	0	0	1
0	1	45	0	0	0	0	0	0	0	0	0	0	0	0	0	0	0	0	0	0	0	0	1
0	0	35	1	1	0	0	0	0	0	0	0	0	0	0	0	0	0	0	0	0	1	0	1
0	1	41	0	0	0	0	0	0	0	0	0	0	0	0	0	0	0	0	0	0	0	0	1
0	1	29	0	0	0	0	0	0	0	0	0	0	0	0	0	0	0	0	0	0	0	0	1
1	1	61	0	0	1	0	0	0	0	0	0	1	0	0	0	0	0	0	0	0	1	0	1
0	1	29	1	1	0	0	0	0	0	0	0	0	0	0	0	0	0	0	0	0	1	0	1
1	1	28	0	0	0	0	0	0	0	0	0	0	1	0	0	0	0	0	0	0	1	0	1
1	1	44	0	0	0	0	0	0	0	0	0	0	0	0	0	0	0	0	0	0	0	0	1
0	1	25	1	1	0	1	0	0	0	0	0	0	0	0	0	0	0	0	0	0	0	0	1
1	0	65	0	0	1	0	0	0	0	0	0	0	0	0	0	0	0	0	0	0	0	0	1
0	1	40	0	0	0	0	0	0	0	0	0	0	0	0	0	0	0	0	0	0	1	0	1
0	1	30	1	1	0	1	0	0	0	0	0	0	0	0	0	0	0	0	0	0	0	0	1
1	1	43	0	0	0	0	0	0	0	0	0	0	0	0	0	0	0	0	0	0	1	0	1
0	1	19	0	0	1	0	0	0	0	1	0	0	0	0	0	0	0	0	0	0	0	0	1
1	1	34	0	0	0	0	0	0	0	0	1	0	0	0	0	0	0	0	0	0	1	0	1
0	1	39	0	1	0	0	0	0	0	0	0	0	0	0	0	0	0	0	0	0	0	0	1
1	0	43	0	0	0	0	0	0	0	0	0	1	0	0	0	0	0	0	0	0	0	0	1
1	0	74	0	0	0	0	0	0	0	0	0	0	0	0	0	0	0	0	0	0	1	0	1
1	0	66	0	0	0	0	0	0	0	0	0	0	0	0	0	0	0	1	0	0	0	0	1
0	1	25	0	0	0	0	0	0	0	0	0	0	0	0	0	0	0	0	0	0	0	0	1
0	1	34	0	0	0	0	0	0	0	0	1	0	1	0	0	0	0	0	0	0	0	0	1
0	1	30	0	0	0	0	0	0	0	0	0	0	0	0	0	0	0	0	0	0	1	0	1
0	1	41	0	0	0	0	0	0	0	0	0	0	0	0	0	0	0	0	0	0	0	0	1
0	1	21	0	0	0	0	0	0	0	0	0	1	0	0	0	0	0	0	0	0	0	0	1
0	1	36	1	1	0	0	0	0	0	0	0	0	0	0	0	0	0	0	0	0	0	0	1
1	0	43	0	0	0	0	0	0	0	0	0	0	0	0	0	0	0	0	0	0	0	0	1
0	1	21	0	0	0	0	0	0	0	0	0	0	0	0	0	0	0	0	0	0	0	0	1
0	1	29	0	0	0	0	0	0	0	0	0	0	0	0	0	0	0	0	0	0	1	0	1
1	0	54	0	0	1	0	0	0	0	0	0	0	0	0	0	0	0	0	0	0	1	0	1
0	1	44	0	0	0	0	0	0	0	0	1	0	0	0	0	0	0	0	0	0	0	0	1
1	0	77	0	0	1	0	0	0	0	0	0	1	0	0	0	0	0	0	0	0	1	0	1
0	1	22	0	0	0	0	0	0	0	0	0	0	0	0	0	0	0	0	0	0	0	0	1
0	1	31	0	0	0	0	0	0	0	0	0	0	0	0	0	0	0	0	0	0	0	0	1
0	0	48	0	0	0	0	0	0	0	0	0	0	0	0	0	0	0	0	0	0	1	0	1
1	1	65	1	0	0	0	0	0	0	0	0	1	0	0	0	0	0	0	0	0	0	0	1
1	0	26	0	0	0	0	0	0	0	0	0	0	0	0	0	0	0	0	0	0	0	0	1
1	0	49	0	0	0	0	0	0	0	0	0	0	0	0	0	0	0	0	0	0	0	0	1
1	1	62	0	0	0	0	0	0	0	0	0	0	1	0	0	0	0	0	0	0	1	1	1
0	1	45	0	0	1	0	0	0	0	0	0	0	0	0	0	0	0	0	0	0	0	0	1
1	1	28	0	0	0	0	0	0	0	0	0	0	1	0	0	0	0	0	0	0	0	0	1
1	1	68	0	0	0	0	0	0	0	0	0	0	0	0	0	0	0	0	0	0	1	1	1
0	0	41	0	0	0	0	0	0	0	0	0	0	0	0	0	0	0	0	0	0	1	0	1
0	1	36	0	0	0	0	0	0	0	0	0	0	0	0	0	0	0	0	0	0	1	0	1
0	1	44	0	1	0	0	0	0	0	0	0	0	0	0	0	0	0	0	0	0	0	0	1
1	1	48	0	0	0	0	0	0	0	0	0	0	0	0	0	0	0	0	0	0	0	0	1
0	1	36	0	0	0	0	0	0	0	1	0	0	0	0	0	0	0	0	0	0	0	0	1
0	1	31	1	1	0	0	0	0	0	0	0	0	0	0	0	0	0	0	0	0	0	0	1
0	0	43	0	0	0	0	0	0	0	0	0	0	0	0	0	0	0	0	0	0	1	0	1
1	0	44	0	0	1	0	0	0	0	0	0	0	0	0	0	0	0	0	0	0	1	0	1
1	0	54	0	0	0	0	0	0	0	0	0	0	1	0	0	0	0	0	0	0	0	0	1
0	1	37	0	0	0	0	0	0	0	0	0	0	0	0	0	0	0	0	0	0	0	0	1
1	1	40	0	0	1	0	0	0	0	0	0	0	0	0	0	0	0	0	0	0	1	0	1
0	1	23	0	0	0	0	0	0	0	0	0	0	0	1	0	0	0	0	0	0	0	0	1
1	0	59	0	0	1	0	0	0	0	0	0	1	0	0	0	0	0	0	0	0	0	0	1
0	1	26	0	0	0	0	0	1	0	0	0	0	0	0	0	0	0	0	0	0	0	0	1
0	1	33	1	0	0	0	0	0	0	0	0	0	0	0	0	0	0	0	0	0	0	0	1
1	1	72	0	0	0	0	0	0	1	0	0	0	1	0	0	0	1	0	0	0	1	1	1
0	0	31	1	0	0	0	0	0	0	0	0	0	1	0	0	0	0	0	0	0	0	0	1
1	1	38	0	0	0	0	0	0	0	0	1	0	0	0	0	0	0	0	0	0	0	0	1
1	0	68	1	1	0	1	0	0	1	0	0	0	1	0	0	0	1	0	0	0	1	1	1
0	0	25	0	0	0	0	0	0	0	0	0	0	0	0	0	0	0	0	0	0	0	0	1
0	1	21	0	0	0	0	0	0	0	1	0	0	0	0	0	0	0	0	0	0	0	0	1
1	1	40	0	0	0	0	0	0	0	0	0	0	0	0	0	0	0	0	0	0	0	0	1
0	0	50	0	0	0	0	0	0	0	0	0	0	0	0	0	0	0	0	0	0	1	0	1
0	1	41	0	0	1	0	0	0	0	0	0	1	0	0	0	0	0	0	0	0	0	0	1
0	1	48	0	0	1	0	0	0	0	0	0	0	0	0	0	0	0	0	0	0	0	0	1
1	0	34	0	0	0	0	0	0	0	0	0	0	0	0	0	0	0	0	0	0	0	0	1
1	0	38	0	0	0	0	0	0	0	0	0	0	1	0	0	0	0	0	0	0	0	0	1
0	1	23	0	0	0	0	0	0	0	0	0	0	0	0	0	0	0	0	0	0	0	0	1
0	1	45	0	0	0	0	0	0	0	0	0	0	0	0	0	0	0	0	0	0	1	0	1
0	1	31	0	0	0	0	0	0	0	0	0	1	0	0	0	0	0	0	0	0	0	0	1
0	1	52	0	0	1	0	0	0	0	0	0	0	0	0	0	0	0	0	0	0	0	0	1
0	1	48	1	0	1	0	0	0	0	0	0	0	0	0	0	0	0	0	0	0	0	0	1
0	1	22	0	0	0	0	0	0	0	0	0	0	0	0	0	0	0	1	0	0	0	0	1
1	0	73	0	0	0	0	0	1	0	0	0	0	0	0	0	1	0	0	0	0	1	0	1
0	1	30	0	0	1	0	0	0	0	0	0	0	0	0	0	0	0	0	0	0	0	0	1
1	0	65	0	0	1	0	0	0	0	0	0	0	0	0	0	0	0	0	0	0	0	0	1
1	1	16	0	0	0	0	0	0	0	0	0	1	0	0	0	0	0	0	0	0	1	0	1
0	1	23	1	1	0	1	0	0	0	0	0	0	0	0	0	0	0	0	0	0	0	0	1
1	1	37	0	0	0	0	0	0	0	0	0	0	0	0	0	0	0	1	0	0	0	0	1
0	1	20	0	0	0	0	0	0	0	0	0	0	0	0	0	0	0	0	0	0	0	0	1
1	0	60	0	0	0	0	0	0	0	0	0	0	1	0	0	0	0	0	0	0	1	0	1
1	0	70	1	0	0	0	0	0	0	0	0	1	1	0	0	0	0	0	0	0	1	1	1
0	1	32	0	0	0	0	0	0	0	0	0	0	0	0	0	0	0	0	0	0	0	0	1
0	1	23	0	0	0	0	0	0	0	0	0	0	1	0	0	0	0	0	0	0	0	0	1
0	1	34	0	0	0	0	0	0	0	0	0	0	0	0	0	0	0	0	0	0	0	0	1
0	1	35	0	0	0	0	0	0	0	0	0	0	0	0	0	0	0	0	0	0	0	0	1
0	1	71	0	0	0	0	0	0	0	0	0	0	0	0	0	0	0	1	0	0	1	0	1
1	1	24	0	0	0	0	0	0	0	0	0	1	0	0	0	0	0	0	0	0	1	0	1
0	1	39	0	0	0	0	0	0	0	0	0	0	0	0	0	0	0	0	0	0	0	0	1
0	0	25	0	0	0	0	0	0	0	0	0	0	0	0	0	0	0	0	0	0	1	0	1
0	1	21	0	0	0	0	0	0	0	1	0	0	0	0	0	0	0	0	0	0	0	0	1
0	1	31	0	0	0	0	0	0	0	1	0	0	0	0	0	0	0	0	0	0	0	0	1
1	1	78	1	1	0	0	1	1	1	0	0	0	0	0	0	0	0	0	0	0	1	0	1
0	1	22	0	0	0	0	0	0	0	0	0	0	0	0	0	0	0	0	0	0	0	0	1
1	1	57	0	0	0	0	0	0	0	0	1	0	0	0	0	0	0	0	0	0	1	1	1
0	1	29	1	0	0	0	0	0	0	1	0	0	1	0	0	0	0	0	0	0	1	0	1
0	1	33	0	0	0	0	0	0	0	1	0	0	0	0	0	0	0	0	0	0	1	0	1
0	1	29	0	0	0	0	0	0	0	0	0	0	0	0	0	0	0	0	0	0	0	0	1
0	1	38	0	0	0	0	0	0	0	0	0	0	0	0	1	0	0	0	0	0	0	0	1
1	0	15	0	0	0	0	0	0	0	0	0	1	0	0	0	0	0	0	0	0	0	0	1
0	1	42	0	0	0	1	0	0	0	0	0	0	0	0	0	0	0	0	0	0	1	0	1
0	1	24	1	1	0	1	0	0	0	0	0	0	0	0	0	0	0	0	0	0	0	0	1
0	0	24	0	0	0	0	0	0	0	0	1	0	1	0	0	0	0	0	0	0	0	0	1
0	1	39	0	1	0	0	0	0	0	0	0	0	0	0	0	0	0	0	0	0	0	0	1
0	1	36	0	0	0	0	0	0	0	0	0	0	0	0	0	0	0	1	0	0	1	1	1
1	1	51	1	1	0	1	0	0	0	0	0	0	0	1	0	0	0	0	0	0	0	0	1
0	0	53	0	0	1	0	0	0	0	0	0	0	0	0	0	0	0	0	0	0	1	0	1
1	1	70	0	0	0	0	0	0	0	0	0	0	0	0	0	0	0	0	0	0	1	1	1
0	1	27	0	0	0	0	0	0	0	0	0	0	0	0	0	0	0	0	0	0	0	0	1
1	0	84	0	0	0	0	0	0	0	0	0	0	0	0	0	0	0	0	0	0	0	0	1
1	0	62	0	0	1	0	0	0	0	0	0	0	0	0	0	0	0	0	0	0	1	0	1
1	1	62	0	0	0	0	0	0	0	0	0	0	0	0	0	0	0	0	0	0	1	0	1
1	1	51	0	0	0	0	0	0	0	0	0	0	0	0	0	0	0	0	0	0	0	0	1
1	1	74	0	0	0	0	0	0	0	0	0	0	0	0	0	0	0	0	0	0	1	0	1
1	0	68	0	0	0	0	0	0	0	0	0	0	0	0	0	0	0	0	0	0	1	0	1
0	1	44	0	0	0	0	0	0	0	0	0	0	0	0	0	0	0	1	0	0	0	0	1
1	0	89	0	0	0	0	0	0	0	0	0	0	0	0	0	0	0	0	0	0	0	0	1
0	1	32	0	0	0	0	0	0	0	0	0	0	0	0	0	0	0	0	0	0	0	0	1
1	1	32	1	0	0	0	0	0	0	0	0	1	0	0	0	0	0	0	0	0	0	0	1
1	1	79	1	0	0	1	0	0	0	0	0	0	0	0	0	0	0	0	0	0	1	0	1
0	1	32	0	0	0	0	0	0	0	1	0	0	0	0	0	0	0	0	0	0	1	0	1
1	0	55	0	0	0	0	0	0	0	0	0	0	0	0	0	0	0	0	0	0	0	0	1
0	1	20	0	1	0	0	0	0	0	1	0	0	0	0	0	0	0	0	0	0	0	0	1
1	1	19	1	0	0	0	0	0	0	0	0	0	0	0	0	0	0	1	0	0	0	0	1
0	1	31	0	0	0	0	0	0	0	0	0	0	0	0	0	0	0	0	0	0	0	0	1
0	1	21	0	0	0	0	0	0	0	1	0	0	0	0	0	0	0	0	0	0	1	0	1
1	1	68	0	0	0	0	0	0	0	0	0	0	0	0	0	1	0	0	0	0	1	0	1
0	1	23	0	0	0	0	0	0	0	1	0	0	0	0	0	0	0	0	0	0	0	0	1
0	1	26	1	1	0	1	0	0	0	0	0	0	0	0	0	0	0	0	0	0	0	0	1
1	0	39	0	0	0	0	0	0	0	0	0	0	0	0	0	0	0	0	0	0	1	0	1
0	1	41	0	0	1	0	0	0	0	0	0	0	0	0	0	0	0	0	0	0	0	0	1
0	1	22	1	1	0	1	0	0	0	1	0	0	0	0	0	0	0	0	0	0	0	0	1
0	1	47	0	0	0	0	0	0	0	0	0	0	0	0	0	0	0	0	0	0	1	0	1
0	0	49	0	0	0	0	0	0	0	0	1	0	0	0	0	0	0	0	0	0	0	0	1
0	1	27	0	0	0	0	0	0	0	0	0	0	1	0	0	0	0	0	0	0	0	0	1
1	1	67	0	0	0	0	0	0	0	0	0	0	0	1	0	0	0	0	0	0	1	0	1
0	1	27	0	0	0	0	0	0	0	1	0	0	1	0	0	0	0	0	0	0	0	0	1
0	0	25	0	0	1	0	0	0	0	0	0	0	0	0	0	0	0	0	0	0	1	0	1
0	1	56	0	0	0	0	0	0	0	0	0	0	0	0	0	0	0	0	0	0	0	0	1
1	1	51	0	0	1	0	0	0	0	0	0	0	0	0	0	0	0	0	0	0	1	0	1
0	1	23	0	1	0	0	0	0	0	0	0	0	0	0	0	1	0	0	0	0	0	0	1
0	1	20	1	1	0	1	0	0	0	1	0	0	0	0	0	0	0	0	0	0	0	0	1
1	0	51	0	0	1	0	0	0	0	0	0	1	1	0	0	0	0	0	0	0	1	0	1
1	0	69	0	0	0	0	0	0	0	0	1	0	0	0	0	0	0	0	0	0	1	0	1
1	1	67	0	0	0	0	0	0	0	0	0	0	0	0	0	0	0	0	0	0	0	0	1
1	1	61	1	1	0	1	0	0	1	0	0	0	0	0	0	0	0	0	0	0	1	1	1
1	1	25	1	0	0	0	0	0	0	0	0	0	0	0	0	0	0	0	0	0	0	0	1
0	1	22	1	1	0	1	0	0	0	0	0	0	0	0	0	0	0	0	0	0	0	0	1
1	0	51	0	0	0	0	0	0	0	0	0	0	0	0	1	0	0	0	0	0	0	0	1
0	1	53	0	0	1	0	0	0	0	0	0	0	0	0	0	0	0	0	0	0	0	0	1
1	0	36	0	0	0	0	0	0	0	0	0	1	0	0	0	0	0	0	0	0	0	0	1
1	1	67	0	0	0	0	0	0	0	0	0	0	0	0	0	0	1	0	0	0	1	0	1
0	1	25	0	0	0	0	0	0	0	1	0	0	0	0	0	0	0	0	0	0	1	0	1
0	0	34	0	0	0	0	0	0	0	0	0	0	0	0	0	0	0	0	0	0	0	0	1
0	1	25	0	0	0	0	0	0	0	0	0	0	0	0	0	0	0	0	0	0	0	0	1
1	0	67	0	0	0	0	0	0	0	0	0	0	0	0	0	0	0	0	0	0	1	0	1
0	1	29	0	0	0	0	0	0	0	0	0	0	0	0	0	0	0	0	0	0	1	0	1
0	1	35	0	0	0	0	0	0	0	0	0	0	1	0	0	0	0	0	0	0	0	0	1
1	0	59	0	0	0	0	0	0	0	0	0	0	0	0	0	0	0	0	0	0	1	0	1
1	1	61	0	0	0	0	0	0	0	0	0	0	0	0	0	0	0	0	0	0	0	0	1
1	1	64	0	0	0	0	0	0	0	0	0	0	0	0	0	0	0	0	0	1	1	1	1
1	0	59	0	0	1	0	0	0	0	0	0	0	1	0	0	0	0	0	0	0	1	0	1
0	0	28	0	0	0	0	0	0	0	0	0	0	1	0	0	0	0	0	0	0	0	0	1
1	1	46	0	0	1	0	0	1	0	0	0	0	0	0	0	0	0	0	0	0	0	0	1
0	1	35	1	1	0	0	0	0	0	0	1	0	0	0	0	0	0	1	0	0	0	0	1
0	1	36	0	0	0	0	0	0	0	0	0	0	0	0	0	0	0	0	0	0	1	1	1
1	0	70	1	0	0	0	0	0	0	0	0	0	0	0	0	0	0	0	0	0	1	0	1
0	1	39	1	1	0	1	0	0	0	0	0	0	1	0	0	0	0	0	0	0	0	0	1
0	1	28	0	0	0	0	0	0	0	1	0	0	0	0	0	0	0	0	0	0	0	0	1
1	1	56	0	0	0	0	0	0	0	0	0	0	0	1	0	0	0	0	0	0	0	0	1
0	1	45	0	0	1	0	0	0	0	0	0	0	0	0	0	0	0	0	0	0	0	0	1
0	1	30	0	0	0	0	0	0	0	0	0	0	0	0	0	0	0	0	0	0	0	0	1
0	1	37	0	0	0	0	0	0	0	0	0	0	0	0	0	0	0	0	0	0	1	0	1
0	1	53	0	0	0	0	0	0	0	0	0	0	0	1	0	0	0	0	0	0	1	0	1
1	0	62	0	0	1	0	0	0	0	0	0	0	0	0	0	0	0	0	0	0	1	0	1
0	1	48	0	0	0	0	0	0	0	0	0	0	0	0	0	0	0	0	0	0	0	0	1
1	1	54	0	1	0	0	0	0	0	0	0	0	0	0	0	0	0	0	0	0	0	0	1
1	1	37	0	0	0	0	0	0	0	0	0	1	0	0	0	0	0	0	0	0	0	0	1
0	1	47	0	0	0	0	0	0	0	0	0	0	1	0	0	0	0	0	0	0	1	0	1
0	1	20	1	1	0	1	0	0	0	0	0	0	0	1	0	0	0	0	0	0	1	0	1
0	1	32	0	0	0	0	0	0	0	0	0	0	0	0	0	0	0	0	0	0	0	0	1
0	1	33	0	0	0	0	0	0	0	0	0	1	0	0	0	0	0	0	0	0	0	0	1
1	0	69	0	0	0	0	0	0	0	0	0	0	0	0	0	0	0	0	0	0	1	0	1
0	1	24	1	1	0	1	0	0	0	1	0	0	0	1	0	0	0	0	0	0	0	0	1
0	1	36	0	0	0	0	0	0	0	0	0	0	0	0	0	0	0	0	0	0	0	0	1
0	1	40	0	0	1	0	0	0	0	0	0	1	0	0	0	0	0	0	0	0	0	0	1
0	1	37	0	0	0	0	0	0	0	0	0	0	1	0	0	0	0	0	0	0	1	0	1
0	1	32	0	0	0	0	0	0	0	0	1	0	0	1	0	0	0	0	0	0	1	0	1
0	1	35	0	1	0	0	0	0	0	0	0	0	0	0	0	0	0	0	0	0	1	0	1
0	1	26	0	1	0	1	0	0	0	0	0	0	1	0	0	0	0	0	0	0	0	0	1
0	1	23	1	1	0	1	0	0	0	0	0	0	0	0	0	0	0	0	0	0	1	0	1
0	0	29	0	1	0	0	0	0	0	0	1	0	0	0	0	0	0	1	0	0	0	0	1
0	0	23	1	1	0	0	0	0	0	0	0	0	0	0	0	0	0	0	0	0	0	0	1
1	0	54	0	0	1	0	1	1	0	0	0	1	0	0	0	0	0	0	0	0	1	0	1
0	0	27	0	0	0	0	0	0	0	0	0	0	0	0	0	0	0	0	0	0	0	0	1
1	0	50	0	0	1	0	0	0	0	0	0	0	1	0	0	0	0	0	0	0	0	0	1
0	1	48	0	0	0	0	0	0	0	0	0	0	0	0	0	0	0	0	0	0	0	0	1
0	1	55	0	0	1	0	0	0	0	0	0	0	0	0	0	0	0	0	0	0	1	0	1
0	1	44	0	0	0	0	0	0	0	0	0	0	1	0	0	0	0	0	0	0	0	0	1
0	0	32	0	0	0	0	0	0	0	0	0	1	1	0	0	0	0	0	0	0	0	0	1
0	1	27	1	1	0	1	0	0	0	0	1	0	0	0	0	0	0	0	0	0	0	0	1
0	1	36	0	0	0	0	0	0	0	0	0	0	0	0	0	0	0	0	0	0	0	0	1
1	0	55	0	0	0	0	0	0	0	0	0	0	0	0	0	0	1	0	0	0	0	0	1
1	0	75	0	0	1	0	0	0	0	0	0	0	0	0	0	0	0	0	0	0	0	0	1
0	1	26	0	0	0	0	0	0	0	0	0	0	0	0	0	0	0	0	0	0	1	1	1
0	1	25	1	1	0	0	0	0	0	0	0	0	0	0	0	0	0	0	0	0	0	0	1
0	0	50	0	0	0	0	0	0	0	0	0	0	0	0	0	0	0	0	0	0	1	0	1
1	0	68	0	0	0	0	0	0	0	0	0	0	0	0	0	0	0	0	0	0	0	0	1
0	1	40	0	0	1	0	0	0	0	0	0	0	0	0	0	0	0	0	0	0	1	0	1
1	0	23	0	0	0	0	0	0	0	0	0	1	0	0	0	0	0	0	0	0	1	0	1
0	0	30	0	0	0	0	0	0	0	0	0	0	1	0	0	0	0	0	0	0	0	0	1
1	1	62	1	0	0	0	0	0	0	0	1	0	0	0	0	0	0	0	0	0	0	0	1
1	0	33	0	0	0	0	0	0	0	0	0	0	0	0	0	0	0	0	0	0	1	0	1
0	0	22	0	0	0	0	0	0	0	1	0	0	0	0	0	0	0	0	0	0	0	0	1
1	1	41	0	0	0	0	0	0	0	0	1	0	0	1	0	0	0	0	0	0	0	0	1
0	0	40	1	0	0	0	0	0	0	1	0	0	0	0	0	0	0	0	0	0	0	0	1
0	1	51	0	0	0	0	0	0	0	0	0	0	0	0	0	0	0	0	0	0	1	0	1
1	0	36	0	0	1	0	0	0	0	0	0	0	0	0	0	0	0	0	0	0	1	0	1
0	1	32	0	0	1	0	0	0	0	0	0	0	0	0	0	0	0	0	0	0	1	0	1
0	1	33	0	0	0	0	0	0	0	0	0	0	0	0	0	0	0	0	0	0	0	0	1
0	1	54	0	0	0	0	0	0	0	0	1	0	0	0	0	0	0	0	0	0	1	1	1
0	1	35	0	0	0	0	0	0	0	0	0	0	0	0	0	0	0	0	0	0	0	0	1
1	0	65	0	0	0	0	0	0	0	0	0	0	1	0	0	0	0	0	0	0	1	0	1
0	1	28	0	0	0	0	0	0	0	0	0	0	0	0	0	0	0	0	0	0	1	0	1
0	1	33	0	0	0	0	0	0	0	0	0	0	0	0	0	0	0	0	0	0	0	0	1
1	0	17	0	0	0	0	0	0	0	1	0	0	0	0	0	0	0	0	0	0	0	0	1
0	1	34	0	0	0	0	0	0	0	0	0	0	0	0	0	0	0	0	0	0	0	0	1
0	1	27	0	0	1	0	0	0	0	1	0	0	0	0	0	0	0	0	0	0	0	0	1
0	0	32	0	0	0	0	0	0	0	0	0	0	0	0	0	0	0	0	0	0	0	0	1
0	0	36	0	0	1	0	0	0	0	0	0	0	0	0	0	0	0	0	0	0	1	0	1
0	1	37	0	0	0	0	0	0	0	0	0	0	0	0	0	0	0	0	0	0	0	0	1
0	1	35	0	0	0	0	0	0	0	0	0	0	0	0	0	0	0	0	0	0	0	0	1
0	1	27	0	0	0	0	0	0	0	0	0	0	0	0	0	0	0	0	0	0	0	0	1
1	1	23	0	0	0	0	0	0	0	0	0	1	0	0	0	0	0	0	0	0	1	0	1
0	1	22	0	0	0	0	0	0	0	1	0	0	0	0	0	0	0	0	0	0	0	0	1
1	0	80	0	0	0	0	0	0	0	0	0	0	0	0	0	0	0	0	0	0	1	0	1
0	1	51	0	0	0	0	0	0	0	0	0	0	0	0	0	0	0	0	0	0	1	0	1
0	1	36	0	0	0	0	0	0	0	0	0	1	0	0	0	0	0	0	0	0	0	0	1
0	1	30	0	0	0	0	0	0	0	0	0	0	0	0	0	0	0	0	0	0	0	0	1
1	1	62	0	0	0	0	0	1	0	0	0	0	0	0	0	0	0	0	0	0	1	0	1
0	1	21	0	0	0	0	0	0	0	0	0	0	0	0	0	0	0	0	0	0	1	0	1
0	1	33	0	0	0	0	0	0	0	0	0	0	0	0	0	0	0	0	0	0	0	0	1
0	1	33	0	0	0	0	0	0	0	0	0	0	0	0	0	0	0	0	0	0	0	0	1
0	1	27	1	1	0	1	0	0	0	0	0	0	0	0	0	0	0	1	0	0	1	0	1
1	1	60	0	0	1	0	0	0	0	0	0	1	0	0	0	0	0	0	0	0	0	0	1
1	1	83	0	0	0	0	0	0	0	0	0	0	0	0	0	0	0	0	0	0	1	1	1
0	1	25	0	1	0	0	0	0	0	0	0	1	0	0	0	0	0	0	0	0	0	0	1
0	1	32	0	0	0	0	0	0	0	0	0	1	0	0	0	0	0	0	0	0	0	0	1
1	1	57	0	1	0	0	0	0	1	0	0	0	0	1	0	0	0	0	0	0	1	0	1
1	1	58	0	0	0	0	0	0	0	0	0	0	1	0	0	0	0	0	0	0	0	0	1
0	1	37	0	0	0	0	0	0	0	0	0	0	0	0	0	0	0	0	0	0	0	0	1
0	1	54	0	1	0	0	0	0	0	0	0	0	0	0	0	0	0	0	0	0	1	1	1
0	1	24	0	0	0	0	1	1	0	0	0	1	0	0	0	0	0	0	0	0	1	0	1
0	1	21	1	1	0	1	0	0	0	0	0	0	0	0	0	0	0	0	0	0	1	0	1
1	0	51	0	0	1	0	0	0	0	0	0	0	0	0	0	0	0	0	0	0	0	0	1
0	1	25	0	0	0	0	0	0	0	0	0	0	0	0	0	0	0	0	0	0	0	0	1
0	1	48	0	0	1	0	0	0	0	0	0	0	0	0	0	0	0	0	0	0	0	0	1
1	0	74	0	0	0	0	0	0	0	0	1	0	0	1	0	0	0	0	0	0	1	0	1
0	1	54	0	0	0	0	0	0	0	0	0	0	0	0	0	0	0	0	0	0	1	0	1
0	1	35	0	0	0	0	0	0	0	0	0	0	0	0	0	0	0	0	0	0	0	0	1
0	1	23	0	1	0	0	0	0	0	0	0	0	0	0	0	0	0	0	0	0	0	0	1
1	0	78	0	0	1	0	0	0	0	0	0	0	0	0	0	0	0	0	0	0	0	0	1
1	1	33	0	0	0	0	0	0	0	0	1	0	0	0	0	0	0	0	0	0	1	0	1
1	0	68	0	0	1	0	0	0	0	0	0	0	0	0	0	0	0	0	0	0	0	0	1
1	1	48	0	0	1	0	0	0	0	0	0	1	0	1	0	0	0	0	0	0	0	0	1
0	1	37	0	0	0	0	0	0	0	0	0	0	0	0	0	0	0	0	0	0	0	0	1
1	1	77	0	0	0	0	0	0	0	0	0	0	0	0	0	0	0	0	0	0	1	1	1
0	1	40	0	1	0	0	0	0	0	0	0	0	0	0	0	0	0	0	0	0	1	0	1
1	0	57	0	0	0	0	0	0	1	0	0	0	0	0	0	0	0	0	0	0	1	1	1
0	0	48	1	1	0	1	0	0	0	0	0	0	0	0	0	0	0	0	0	0	0	0	1
1	1	18	0	0	0	0	0	0	0	0	0	0	0	0	0	0	0	0	0	0	0	0	1
0	1	53	0	0	0	0	0	0	0	0	0	0	0	0	0	0	0	0	0	0	0	0	1
0	1	35	1	1	0	0	0	0	0	1	0	0	0	0	0	0	0	0	0	0	0	0	1
0	1	31	0	0	0	0	0	0	0	0	0	0	0	0	0	0	0	0	0	0	0	0	1
1	1	24	0	0	0	0	0	0	0	1	0	0	0	0	0	0	0	0	0	0	0	0	1
0	0	39	0	0	0	0	0	0	0	1	0	0	0	0	0	0	0	0	0	0	0	0	1
1	0	37	0	0	1	0	0	0	0	0	0	0	0	0	0	0	0	0	0	0	0	0	1
0	1	34	0	0	0	0	0	0	0	0	0	0	0	0	0	0	0	0	0	0	0	0	1
0	1	32	0	0	0	0	0	0	0	0	0	0	0	0	0	0	0	0	0	0	0	0	1
0	1	34	1	0	0	0	0	0	0	1	0	0	0	1	0	0	0	0	0	0	0	0	1
1	1	58	0	0	0	0	0	1	0	0	1	0	0	0	0	0	0	0	0	0	1	1	1
0	0	33	0	0	0	0	0	0	0	0	0	0	0	0	0	0	0	0	0	0	0	0	1
0	1	39	0	0	0	0	0	0	0	0	0	0	0	0	0	0	0	0	0	0	0	0	1
1	0	52	0	0	0	0	0	1	0	0	0	1	1	0	0	0	0	0	0	0	1	0	1
1	0	66	0	0	0	0	0	0	0	0	0	0	1	0	0	0	0	0	0	0	1	0	1
0	1	56	0	0	0	0	0	0	0	0	0	0	0	0	0	0	0	0	0	0	0	0	1
0	1	22	1	0	0	0	0	0	0	0	0	0	1	0	0	0	0	0	0	0	0	0	1
1	0	72	0	0	0	0	0	0	0	0	0	1	0	0	0	0	0	0	0	0	1	0	1
1	0	60	0	0	0	0	0	0	0	0	0	0	0	0	0	0	0	0	0	1	1	0	1
0	0	52	0	0	0	0	0	0	0	0	0	0	1	0	0	0	0	0	0	0	0	0	1
0	1	20	1	0	0	0	0	0	0	0	0	1	0	0	0	0	0	0	0	0	0	0	1
0	1	30	1	0	0	0	0	0	0	0	0	0	0	0	0	0	0	0	0	0	0	0	1
1	0	37	0	1	0	0	1	1	0	0	1	0	0	0	0	0	0	0	0	0	1	1	1
0	1	24	0	0	0	0	0	0	0	0	0	0	0	0	0	0	0	0	0	0	0	0	1
0	1	34	0	0	0	0	0	0	0	0	0	0	0	0	0	0	0	0	0	0	1	0	1
0	1	22	0	0	0	0	0	0	0	1	0	0	0	0	0	0	0	0	0	0	0	0	1
0	0	28	0	0	0	0	0	0	0	0	0	0	0	0	0	0	0	0	0	0	1	0	1
0	1	20	0	0	0	0	0	0	0	0	0	0	0	0	0	0	0	0	0	0	0	0	1
1	0	53	0	0	0	0	0	0	0	0	0	0	0	0	0	0	0	0	0	0	0	0	1
1	0	55	0	0	1	0	0	0	0	0	0	0	1	0	0	0	0	0	0	0	1	1	1
0	1	27	1	1	0	1	0	0	0	0	0	0	0	0	0	0	0	0	0	0	0	0	1
0	1	44	0	0	0	0	0	0	0	0	0	0	0	0	0	0	0	0	0	0	0	0	1
0	1	48	0	0	0	0	0	0	0	0	0	0	0	0	0	0	0	0	0	0	0	0	1
1	0	64	0	0	0	0	0	0	0	0	0	0	1	0	0	0	0	0	0	0	1	0	1
0	1	31	0	0	0	0	0	0	0	0	0	0	0	0	0	0	0	0	0	0	0	0	1
1	0	24	0	0	0	0	0	0	0	0	0	0	0	0	0	0	0	0	0	0	0	0	1
1	0	42	0	0	0	0	0	0	0	0	0	0	1	0	0	0	0	0	0	0	1	0	1
0	1	28	0	0	0	0	0	0	0	0	0	0	0	0	0	0	0	0	0	0	0	0	1
0	0	38	0	0	0	0	0	0	0	0	0	0	0	0	0	0	0	0	0	0	1	0	1
0	1	32	0	0	0	0	0	0	0	0	0	0	0	0	0	0	0	0	0	0	0	0	1
1	0	70	0	0	0	0	0	0	0	0	0	0	0	0	0	0	0	0	0	0	1	0	1
1	0	45	0	0	0	0	0	0	0	0	0	1	0	0	0	0	0	0	0	0	1	0	1
0	1	30	0	0	0	0	0	0	0	0	0	0	0	0	0	0	0	0	0	0	0	0	1
0	1	24	0	0	0	0	0	0	0	0	0	0	1	0	0	0	0	0	0	0	0	0	1
0	1	26	0	0	0	0	0	0	0	0	0	0	0	0	0	0	0	0	0	0	0	0	1
1	1	72	0	0	1	0	1	1	0	0	0	0	0	0	0	0	0	0	0	0	1	1	1
1	1	60	0	0	1	0	0	0	0	0	0	0	0	0	0	0	0	0	0	0	0	0	1
0	1	26	1	0	0	0	0	0	0	0	0	0	0	0	0	0	0	0	0	0	0	0	1
0	1	29	0	0	0	0	0	0	0	1	0	0	1	0	0	0	0	0	0	0	0	0	1
1	0	63	0	0	1	0	0	0	0	0	0	0	1	0	0	0	0	0	0	0	1	0	1
0	1	33	1	1	0	1	0	0	0	0	0	0	0	0	0	0	0	0	0	0	1	0	1
0	1	33	0	0	1	0	0	0	0	1	0	0	0	0	0	0	0	0	0	0	1	0	1
1	0	67	0	0	0	0	0	1	1	0	0	0	0	0	0	0	0	0	0	0	1	1	1
1	1	45	0	0	0	0	0	0	0	0	0	0	0	0	0	0	0	0	0	0	0	0	1
0	1	38	0	1	0	0	0	0	0	0	0	0	0	0	0	0	0	0	0	0	0	0	1
0	1	28	0	0	0	0	0	0	0	1	0	0	0	0	0	0	0	0	0	0	1	0	1
1	1	76	0	0	1	0	0	0	0	0	0	0	0	0	0	0	0	0	0	0	1	0	1
0	1	38	0	0	0	0	0	0	0	1	0	0	0	0	0	0	0	0	0	0	0	0	1
0	1	43	0	0	0	0	0	0	0	0	0	0	0	0	0	0	0	0	0	0	1	0	1
0	1	29	1	0	0	0	0	0	0	0	0	0	0	0	0	0	0	1	0	0	0	0	1
1	1	22	1	0	0	0	0	0	0	1	0	0	0	0	0	0	0	0	0	0	0	0	1
1	1	66	0	0	0	0	0	0	0	0	0	0	0	0	0	0	0	0	0	0	0	0	1
0	1	36	0	0	0	0	0	0	0	0	0	0	0	0	0	0	0	0	0	0	0	0	1
0	1	25	1	0	0	0	0	0	0	0	0	0	0	0	0	0	0	0	0	0	0	0	1
0	1	38	0	0	1	0	0	0	0	0	0	0	0	0	0	0	0	0	0	0	1	0	1
0	1	36	0	0	0	0	0	0	0	0	0	0	0	0	0	0	0	0	0	0	0	0	1
0	1	31	0	0	0	0	0	0	0	0	0	0	0	0	0	0	0	0	0	0	0	0	1
1	1	70	0	0	0	0	0	0	0	0	0	0	0	1	0	0	0	0	0	0	1	1	1
1	1	61	0	0	0	0	0	0	0	0	0	0	0	0	0	0	0	0	1	0	1	1	1
0	1	28	0	0	0	0	0	0	0	0	0	0	0	0	0	0	0	0	0	0	0	0	1
0	1	48	0	0	0	0	0	0	0	0	0	0	0	0	0	0	0	0	0	1	1	0	1
1	0	34	0	0	0	0	0	0	0	0	1	0	1	0	0	0	0	0	0	0	1	1	1
1	0	59	1	0	0	0	0	0	0	0	0	0	0	0	0	0	0	0	0	0	1	1	1
1	1	49	1	1	0	1	0	0	0	0	0	0	0	0	0	0	0	0	0	0	1	0	1
0	1	41	1	1	0	0	0	0	0	0	0	0	0	0	0	0	0	0	0	0	1	0	1
0	1	35	0	0	1	0	0	0	0	0	0	0	1	0	0	0	0	0	0	0	0	0	1
0	0	77	0	0	0	0	0	0	0	0	0	0	0	0	0	0	0	0	0	0	1	0	1
0	1	53	0	0	0	0	0	0	0	0	0	0	0	0	0	0	0	0	0	0	0	0	1
0	1	35	1	0	0	0	0	0	0	0	0	0	0	0	0	0	0	0	0	0	0	0	1
0	1	23	1	0	0	0	0	0	0	0	0	0	0	0	0	0	0	0	0	0	0	0	1
0	1	37	0	0	0	0	0	0	0	0	0	0	0	0	0	0	0	0	0	0	1	0	1
1	1	75	0	0	0	0	0	0	0	0	0	0	0	0	0	0	0	0	0	0	1	0	1
1	0	77	0	0	0	0	0	0	0	0	0	1	0	0	0	0	0	0	0	0	1	1	1
0	1	23	0	0	0	0	0	0	0	1	0	0	0	0	0	0	0	0	0	0	1	0	1
0	0	46	0	0	0	0	0	0	0	0	0	0	0	0	0	0	0	0	0	0	0	0	1
1	1	54	0	0	0	0	0	0	0	0	0	0	0	0	0	0	0	0	0	1	1	0	1
1	1	78	0	0	0	0	0	0	0	0	0	0	0	0	0	0	0	0	0	0	1	0	1
1	0	16	0	0	1	0	0	0	0	0	0	0	0	0	0	0	0	0	0	0	1	0	1
1	0	68	0	0	0	0	0	0	0	0	0	0	1	0	0	0	0	0	0	0	0	0	1
1	1	32	0	0	0	1	0	0	0	1	0	0	0	0	0	0	0	0	0	0	1	0	1
1	0	36	0	0	1	0	0	0	0	0	0	0	0	0	0	0	0	0	0	0	1	0	1
1	0	57	0	0	0	0	0	1	0	0	0	0	0	0	0	0	0	0	0	0	1	0	1
0	1	37	0	0	0	0	0	0	0	0	0	0	0	0	0	0	0	0	0	0	0	0	1
0	1	24	1	1	0	0	0	0	0	0	0	0	0	0	0	0	0	0	0	0	0	0	1
0	0	28	1	1	0	1	0	0	0	0	1	0	0	0	0	0	0	0	0	0	0	0	1
1	0	60	0	0	0	0	0	0	0	0	0	0	0	1	0	0	0	0	0	0	1	0	1
1	1	27	0	0	0	0	0	0	0	0	0	0	0	0	0	0	0	0	0	0	0	0	1
0	0	48	0	0	0	0	0	0	0	0	0	0	0	0	0	0	0	0	0	0	1	1	1
1	0	57	0	0	0	0	0	0	0	0	0	0	1	0	0	0	0	0	0	0	1	1	1
0	1	24	0	0	0	0	0	0	0	0	0	0	0	0	0	0	0	0	0	0	0	0	1
1	1	33	0	0	0	0	0	0	0	0	0	1	0	0	0	0	0	0	0	0	0	0	1
0	1	33	0	0	1	0	0	0	0	0	0	0	0	0	0	0	0	0	0	0	0	0	1
0	1	37	0	0	0	0	0	0	0	1	0	0	0	0	0	0	0	0	0	0	0	0	1
0	1	47	0	0	0	0	0	0	0	0	0	0	1	0	0	0	0	0	0	0	0	0	1
0	0	55	0	0	0	0	0	0	0	0	0	0	0	0	0	0	0	0	0	0	1	0	1
1	0	78	0	0	0	0	0	0	0	0	0	0	0	0	0	0	0	0	0	0	1	0	1
0	1	45	1	1	0	1	0	0	0	0	0	0	0	0	0	0	0	0	0	0	0	0	1
0	0	26	0	0	0	0	0	0	0	0	0	0	0	0	0	0	0	0	0	0	0	0	1
0	1	28	1	1	0	1	0	0	0	0	0	0	0	0	0	0	0	0	0	0	0	0	1
0	1	21	0	0	0	0	0	0	0	0	0	0	1	0	0	0	0	0	0	0	1	0	1
1	0	47	0	0	0	0	0	0	0	0	0	0	0	0	0	0	0	0	0	0	0	0	1
1	0	52	0	0	0	0	0	0	0	0	0	0	0	0	0	0	0	0	0	0	0	0	1
0	1	31	0	0	1	0	0	0	0	0	0	0	0	0	0	0	0	0	0	0	1	0	1
0	1	69	0	1	0	0	0	0	0	0	0	0	0	0	0	0	0	1	0	0	0	0	1
1	1	54	0	0	0	0	0	0	0	0	0	0	0	0	0	0	0	0	0	0	1	0	1
0	0	45	0	0	0	0	0	0	0	0	0	0	0	0	0	0	0	1	0	0	1	1	1
1	1	68	0	0	0	0	0	0	0	0	1	0	0	0	0	0	0	0	0	0	0	0	1
0	1	36	1	0	0	0	0	0	0	0	0	0	0	0	0	0	0	0	0	0	1	1	1
0	1	38	0	0	0	0	0	0	0	0	0	0	0	0	0	0	0	0	0	0	0	0	1
0	1	31	1	0	0	0	0	0	0	0	0	0	0	0	0	0	0	0	0	0	1	0	1
0	0	78	1	1	0	1	0	0	0	0	0	0	0	0	0	0	0	0	0	0	1	1	1
1	1	26	0	0	0	0	0	0	0	0	0	0	0	0	0	0	0	0	0	0	1	0	1
0	1	34	1	1	0	1	0	0	0	0	0	0	0	0	0	0	0	0	0	0	1	0	1
1	1	64	1	1	0	1	0	0	0	0	0	0	1	0	0	0	0	1	0	0	1	1	1
0	0	26	0	0	0	0	0	0	0	0	1	0	0	0	0	0	0	1	0	0	0	0	1
1	0	62	0	0	1	0	0	0	0	0	0	1	0	1	0	0	0	0	0	0	1	0	1
0	1	52	0	0	0	0	0	0	0	0	0	0	0	1	0	0	0	0	0	0	0	0	1
0	0	40	0	0	0	0	0	0	0	0	0	0	0	0	0	0	0	0	0	0	1	0	1
1	1	73	0	0	0	0	0	0	0	0	0	0	0	0	0	0	0	1	0	0	0	0	1
1	0	78	0	0	0	0	0	0	0	0	0	0	1	0	0	0	0	0	0	0	0	0	1
0	1	41	0	0	0	0	0	0	0	0	0	0	0	0	0	0	0	0	0	0	1	0	1
0	1	28	0	0	0	0	0	0	0	0	0	0	0	0	0	0	0	0	0	0	0	0	1
0	0	44	1	1	0	1	0	0	0	0	0	0	0	0	0	0	0	0	0	0	0	0	1
1	1	64	0	0	0	0	0	0	0	0	0	0	0	0	0	0	0	1	0	0	1	1	1
1	0	67	0	0	1	0	0	0	0	0	0	0	0	0	0	0	0	0	0	0	1	0	1
1	0	68	0	0	0	0	0	0	0	0	0	0	0	0	0	0	0	0	0	0	0	0	1
0	1	26	1	1	0	0	0	0	0	0	0	0	0	0	0	0	0	0	0	0	0	0	1
0	1	22	1	1	0	0	0	0	0	1	0	0	0	0	0	0	0	0	0	0	0	0	1
1	0	55	0	0	0	0	0	0	0	1	0	0	0	0	0	0	0	0	0	0	0	0	1
1	1	84	0	0	0	1	0	0	0	0	1	0	0	0	0	0	0	0	0	0	1	1	1
1	0	55	0	0	1	0	0	0	0	0	0	0	0	0	0	0	0	0	0	0	0	0	1
1	0	65	0	0	0	0	0	0	0	0	0	0	1	0	0	0	0	0	0	0	1	0	1
0	1	25	0	0	0	0	0	0	0	0	0	0	0	0	0	0	0	0	0	0	0	0	1
0	0	21	0	0	0	0	0	0	0	1	0	0	1	0	0	0	0	0	0	0	0	0	1
1	1	49	0	0	0	0	0	0	0	0	0	0	0	0	0	0	0	0	0	0	0	0	1
1	0	83	0	0	0	0	0	0	0	0	0	0	0	0	0	0	0	0	0	0	1	0	1
1	1	27	0	0	0	0	0	0	0	0	0	1	0	1	0	0	0	0	0	0	0	0	1
0	1	26	0	0	0	0	0	0	0	0	0	0	0	0	0	0	0	0	0	0	1	0	1
1	0	47	1	1	0	1	0	0	0	0	0	0	0	0	0	0	0	0	0	0	1	1	1
1	1	42	0	0	0	0	0	0	0	0	0	0	0	0	0	0	0	0	0	0	0	0	1
1	1	38	0	0	0	0	0	0	0	0	0	0	0	0	0	0	0	0	0	0	0	0	1
0	1	22	1	0	0	1	0	0	0	0	0	0	0	0	0	0	0	0	0	0	0	0	1
0	1	20	0	0	0	0	0	0	0	0	0	0	0	1	0	0	0	0	0	0	1	0	1
1	1	84	0	0	0	0	0	0	0	0	1	0	0	0	0	0	1	0	0	0	0	0	1
0	1	44	0	0	0	0	0	0	0	0	0	0	0	0	0	0	0	0	0	0	1	0	1
1	0	66	0	0	0	0	0	0	0	0	0	0	0	0	0	0	0	0	0	0	1	0	1
0	1	69	0	0	0	0	0	0	0	0	0	1	1	0	0	0	0	0	0	0	0	0	1
1	0	74	0	0	0	0	0	0	0	0	0	0	1	0	0	1	0	0	0	0	1	0	1
1	0	57	0	0	1	0	0	0	0	0	0	0	0	0	0	0	0	0	0	0	0	0	1
1	0	25	0	0	0	0	0	0	0	0	0	1	0	0	0	0	0	0	0	0	1	0	1
1	0	69	0	0	0	0	0	0	0	0	0	0	0	0	0	0	0	0	0	0	0	0	1
0	1	25	0	0	0	0	0	0	0	0	0	0	1	0	0	0	0	0	0	0	0	0	1
1	0	70	0	0	1	0	0	0	0	0	0	0	0	0	0	0	0	0	0	0	1	0	1
1	0	47	0	0	0	0	0	0	0	0	0	0	0	1	0	0	0	0	0	0	0	0	1
0	1	52	0	0	0	0	0	0	0	0	1	0	0	0	0	0	0	1	0	0	1	0	1
1	1	40	0	0	0	0	0	0	0	0	0	0	0	0	0	0	0	0	0	0	0	0	1
0	0	48	0	0	0	1	0	0	0	0	0	0	0	0	0	0	0	0	0	0	1	1	1
0	1	24	1	1	0	1	0	0	0	1	0	0	1	0	0	0	0	0	0	0	0	0	1
0	1	26	0	0	0	0	0	0	0	1	0	0	0	0	0	0	0	0	0	0	0	0	1
0	1	25	0	0	0	0	0	0	0	0	0	0	0	0	0	0	0	0	0	0	0	0	1
1	1	74	1	1	0	1	0	0	0	0	0	0	0	0	0	0	0	0	0	0	1	1	1
1	1	62	0	0	0	0	0	0	0	0	0	0	0	0	0	0	0	0	0	0	0	0	1
0	1	43	0	1	0	0	0	0	0	0	0	0	0	0	0	0	0	0	0	0	0	0	1
0	0	54	0	0	0	0	0	0	0	1	0	0	1	0	0	0	0	0	0	0	0	0	1
1	0	74	0	0	0	0	0	0	0	0	0	0	0	0	0	0	0	0	0	0	0	0	1
0	1	28	0	0	0	0	0	0	0	0	0	0	0	0	0	0	0	0	0	0	0	0	1
0	0	21	0	0	0	0	0	0	0	0	0	0	0	0	0	0	0	0	0	0	0	0	1
0	0	33	0	0	0	0	0	0	0	0	0	0	0	0	0	0	0	0	0	0	0	0	1
0	1	23	0	0	0	0	0	0	0	1	0	0	0	0	0	0	0	0	0	0	0	0	1
1	0	65	0	0	0	0	0	0	0	0	0	0	0	0	0	0	0	0	0	0	1	1	1
1	1	28	0	0	0	0	0	0	0	0	1	0	0	0	0	0	0	0	0	0	0	0	1
0	1	33	1	1	0	0	0	0	0	0	0	0	0	0	0	0	0	0	0	0	1	0	1
0	1	54	0	0	0	0	0	0	0	0	0	0	0	0	0	0	0	0	0	0	0	0	1
1	1	31	0	0	0	0	0	0	0	0	0	0	0	0	0	0	0	0	0	0	0	0	1
0	1	23	0	0	0	0	0	0	0	0	0	0	0	0	0	0	1	0	0	0	0	0	1
0	1	35	0	0	0	0	0	0	0	1	0	0	0	0	0	0	0	0	0	0	0	0	1
0	1	27	0	0	0	0	0	0	0	0	0	0	0	0	0	0	0	0	0	0	0	0	1
0	1	28	1	1	0	1	0	0	0	0	0	0	0	0	0	0	0	0	0	0	0	0	1
0	1	26	0	0	0	0	0	0	0	0	0	0	0	0	0	0	0	0	0	0	1	0	1
1	0	57	0	0	1	0	0	0	0	0	1	0	1	0	0	0	0	0	0	0	1	0	1
0	1	25	0	0	0	0	0	0	0	0	0	0	0	0	0	0	0	0	0	0	0	0	1
0	1	41	0	0	0	0	0	0	0	0	0	1	0	0	0	0	0	0	0	0	0	0	1
1	0	22	0	0	0	0	0	0	0	1	0	0	0	0	0	0	0	0	0	0	0	0	1
1	0	34	0	0	0	0	0	0	0	0	0	0	0	0	0	0	0	0	0	0	0	0	1
0	1	24	0	0	0	0	0	1	0	1	0	0	0	0	0	0	0	0	0	0	0	0	1
0	1	44	0	0	0	0	0	0	0	0	0	0	0	0	0	0	0	0	0	0	1	0	1
1	1	33	0	1	0	0	0	0	0	0	0	0	0	0	0	0	0	0	0	0	1	0	1
0	1	34	1	1	0	1	0	0	0	0	0	1	0	0	0	0	0	0	0	0	0	0	1
1	0	69	0	0	0	0	0	0	0	0	0	0	0	0	0	0	0	0	0	0	1	1	1
0	0	54	0	0	0	0	0	0	0	0	0	0	0	0	0	0	0	0	0	0	0	0	1
0	1	39	0	0	0	1	0	0	0	0	1	0	0	0	0	0	0	0	0	0	1	0	1
1	1	26	1	0	0	0	0	0	0	0	0	0	0	0	0	0	0	0	0	0	0	0	1
1	1	35	1	1	0	1	0	0	0	0	1	0	0	0	0	0	0	0	0	0	1	1	1
1	0	63	0	0	0	0	0	0	0	0	0	0	0	0	0	0	0	0	0	0	0	0	1
1	1	21	0	0	0	0	0	0	0	0	0	0	0	1	0	0	0	0	0	0	0	0	1
0	1	35	0	0	0	0	0	0	0	0	0	0	0	0	0	0	0	0	0	0	0	0	1
1	0	56	0	0	0	0	0	0	0	0	0	0	0	0	0	0	0	0	0	0	0	0	1
1	1	84	0	0	0	0	0	0	0	0	0	0	0	0	0	0	0	0	0	0	1	1	1
0	1	20	1	1	0	1	0	0	0	0	0	0	0	0	0	0	0	0	0	0	0	0	1
0	0	25	0	0	0	0	0	0	0	0	0	0	0	0	0	0	0	0	0	0	0	0	1
0	0	65	0	0	1	0	0	0	0	0	0	0	0	0	0	0	0	0	0	0	0	0	1
0	1	41	0	0	0	0	0	0	0	0	0	0	0	0	0	0	0	0	0	0	0	0	1
1	1	22	1	1	0	1	0	1	0	1	0	0	0	0	0	0	0	1	0	0	1	1	1
0	1	25	0	0	0	0	0	0	0	1	0	0	0	1	0	0	0	0	0	0	0	0	1
0	1	40	0	0	0	0	0	0	0	0	0	0	0	0	0	0	0	0	0	0	0	0	1
0	1	33	0	0	0	0	0	0	0	0	0	0	0	0	0	0	0	0	0	0	1	0	1
0	1	31	0	0	0	0	0	0	0	1	0	0	0	0	0	0	0	0	0	0	0	0	1
0	1	22	1	1	0	0	0	0	0	0	0	1	0	0	0	0	0	0	0	0	0	0	1
1	0	65	0	0	0	0	0	0	0	1	0	0	0	1	0	0	0	0	0	0	1	0	1
0	1	28	1	1	0	1	0	0	0	0	0	0	0	0	0	0	0	0	0	0	1	0	1
0	1	26	0	0	1	0	0	0	0	0	0	0	0	0	0	0	0	0	0	0	0	0	1
1	0	41	0	0	0	0	0	0	0	0	0	0	1	0	0	0	0	0	0	0	1	0	1
1	0	70	0	0	1	0	0	0	0	0	0	0	1	0	0	0	0	0	0	0	1	1	1
1	1	59	0	0	0	0	0	0	0	0	0	1	0	0	0	0	0	0	0	0	1	0	1
0	1	23	0	0	0	0	0	0	0	0	0	0	0	0	0	0	0	0	0	0	0	0	1
0	1	41	0	0	0	0	0	0	0	1	0	0	0	0	0	0	0	0	0	0	0	0	1
0	1	22	0	0	0	0	0	0	0	1	0	0	0	0	0	0	0	0	0	0	0	0	1
0	1	40	0	0	0	0	0	0	0	0	0	0	0	0	0	0	0	0	0	0	0	0	1
0	1	48	0	0	0	0	0	0	1	0	0	0	0	0	0	0	0	0	0	0	1	0	1
1	0	48	0	0	0	0	0	0	0	0	0	0	1	0	0	0	0	0	0	0	1	0	1
1	1	45	0	0	0	0	0	0	0	0	0	0	0	0	0	0	0	0	0	0	1	0	1
1	0	61	0	0	0	0	0	0	0	0	0	1	0	0	0	0	0	0	0	0	1	0	1
0	1	41	0	0	1	0	0	0	0	1	0	0	0	0	0	0	0	0	0	0	0	0	1
1	1	68	0	0	0	0	0	0	0	0	0	0	0	0	0	0	0	0	0	0	0	0	1
0	1	35	0	0	0	0	0	0	0	0	0	0	0	0	0	0	0	0	0	0	0	0	1
1	1	20	0	0	0	1	0	0	0	1	0	0	0	0	0	0	0	0	0	0	1	0	1
1	1	33	0	0	0	0	0	0	0	0	0	0	0	0	0	0	0	0	0	0	0	0	1
1	0	22	0	0	0	0	0	0	0	0	0	0	0	0	0	0	0	0	0	0	0	0	1
0	1	44	0	0	0	0	0	0	0	0	0	0	0	0	0	0	0	0	0	0	1	0	1
1	1	42	1	1	0	1	0	0	0	0	0	0	1	0	0	0	0	0	0	0	0	0	1
0	1	43	0	0	0	0	0	0	0	0	0	0	0	0	0	0	0	0	0	0	1	0	1
1	1	65	1	0	0	0	0	0	0	0	0	0	1	0	0	0	0	0	0	0	0	0	1
0	1	48	0	0	0	0	0	0	0	0	0	0	0	0	0	0	0	0	0	0	0	0	1
0	1	39	0	0	0	0	0	0	0	0	0	0	0	0	0	0	0	0	0	0	0	0	1
0	1	24	0	0	0	0	0	0	0	0	0	0	0	0	0	0	0	0	0	0	0	0	1
1	1	61	0	0	0	0	0	0	0	0	0	0	0	0	0	0	0	0	0	0	0	0	1
0	0	24	1	1	0	0	0	0	0	0	0	0	0	0	0	0	0	0	0	0	0	0	1
1	0	81	0	0	0	0	0	0	0	0	1	0	1	0	0	0	0	0	0	0	1	0	1
0	1	24	0	0	0	0	1	1	0	1	0	0	0	0	0	0	0	0	0	0	0	0	1
0	1	31	0	0	0	0	0	0	0	0	0	0	1	0	0	0	0	0	0	0	0	0	1
1	0	55	0	0	1	0	0	0	0	0	0	0	0	0	0	0	0	0	0	0	0	0	1
0	1	34	0	0	0	0	0	0	0	0	0	0	0	0	0	0	0	0	0	0	0	0	1
0	1	26	1	1	0	1	0	0	0	1	0	0	0	0	0	0	0	0	0	0	0	0	1
0	1	42	0	0	0	0	0	0	0	0	0	0	0	0	0	0	0	0	0	0	0	0	1
0	1	34	0	0	0	0	0	0	0	0	0	0	0	0	0	0	0	0	0	0	0	0	1
1	0	49	0	0	0	0	0	0	0	0	0	1	0	0	0	0	0	0	0	0	1	1	1
1	1	74	0	0	0	1	0	0	0	0	0	0	0	0	0	0	0	0	0	0	0	0	1
1	1	50	1	1	0	1	0	0	0	1	0	0	0	0	0	0	0	0	0	0	1	0	1
1	1	41	1	1	0	1	0	0	0	0	0	0	1	0	0	0	0	0	0	0	1	1	1
1	0	58	1	0	0	0	0	0	0	0	0	0	0	0	0	0	0	0	0	0	0	0	1
0	1	40	0	0	0	0	0	0	0	0	0	0	0	0	0	0	0	0	0	0	1	0	1
1	0	70	0	0	0	0	0	0	0	0	0	0	0	0	0	0	0	0	0	0	1	0	1
0	0	43	0	0	0	0	0	0	0	0	0	0	1	0	0	0	0	0	0	0	1	1	1
0	1	18	0	0	0	0	0	0	0	0	0	0	1	0	0	0	0	0	0	0	0	0	1
0	1	32	1	0	0	0	0	0	0	0	0	0	0	0	0	0	0	0	0	0	0	0	1
1	1	29	0	0	1	0	0	0	0	0	0	0	0	0	0	0	0	0	0	0	0	0	1
1	1	34	0	0	0	0	0	0	0	0	0	0	0	0	0	0	0	0	0	0	0	0	1
1	1	61	0	0	1	0	0	0	0	0	0	0	0	0	0	0	0	0	0	0	1	0	1
0	0	45	0	0	0	0	0	0	0	1	0	0	1	0	0	0	0	0	0	0	1	0	1
0	0	47	0	0	0	0	0	0	0	0	0	0	1	0	0	0	0	0	0	0	1	0	1
0	1	28	0	0	1	0	0	0	0	0	0	0	0	0	0	0	0	0	0	0	0	0	1
1	1	37	0	0	0	0	0	0	0	0	0	0	1	0	0	0	0	0	0	0	1	0	1
1	1	67	0	0	0	0	0	0	0	0	1	0	0	0	0	0	0	0	0	0	1	1	1
0	1	50	0	0	0	0	0	0	0	1	0	0	0	0	0	0	0	0	0	0	1	0	1
1	0	64	0	0	0	0	0	0	0	0	0	0	1	0	0	0	0	0	0	0	1	0	1
0	1	37	0	0	0	0	0	0	0	0	0	0	0	0	0	0	0	0	0	0	0	0	1
0	1	33	0	0	1	0	0	0	0	0	0	0	0	0	0	0	0	0	0	0	0	0	1
1	1	59	0	0	0	0	1	1	0	0	0	0	0	1	1	0	1	0	0	0	1	1	1
1	1	74	0	0	0	0	0	0	0	0	0	0	0	0	0	0	0	0	0	0	1	0	1
0	0	30	0	0	0	0	0	0	0	0	0	0	0	0	0	0	0	0	0	0	0	0	1
1	0	67	0	0	1	0	0	0	0	0	0	0	0	0	0	0	0	0	0	0	1	0	1
0	0	40	0	0	0	0	0	0	0	0	0	0	1	0	0	0	0	0	0	0	1	0	1
0	1	32	0	0	0	0	0	0	0	0	0	0	0	0	0	0	0	0	0	0	0	0	1
0	1	25	0	0	0	0	0	0	0	0	1	0	0	0	0	0	0	0	0	0	0	0	1
0	1	47	0	0	0	0	0	0	0	0	0	0	0	0	0	0	0	0	0	0	0	0	1
0	1	41	0	0	0	0	0	0	0	0	0	0	0	0	0	0	0	0	0	0	0	0	1
0	1	34	1	1	0	1	0	0	0	0	0	0	0	0	0	0	0	0	0	0	0	0	1
1	0	52	0	0	0	0	0	0	0	0	0	1	0	0	0	0	0	0	0	0	0	0	1
0	1	47	0	0	0	0	0	0	0	0	0	0	0	0	0	0	0	0	0	0	0	0	1
0	1	59	1	1	0	1	0	0	0	0	0	0	0	0	0	0	0	0	0	0	0	0	1
0	1	35	1	0	0	0	0	0	0	0	0	0	0	0	0	0	0	0	0	0	0	0	1
1	1	44	1	1	0	1	0	0	0	0	0	0	1	0	0	0	0	0	0	0	0	0	1
0	1	27	0	0	0	0	0	0	0	0	0	0	0	0	0	0	0	0	0	0	0	0	1
1	1	53	0	0	0	0	0	0	0	0	0	0	0	0	0	0	0	0	0	0	0	0	1
0	1	19	1	1	0	0	0	0	0	0	0	0	0	0	0	0	0	0	0	0	0	0	1
1	1	75	0	0	0	0	0	0	0	0	0	0	1	0	0	0	0	0	0	0	0	0	1
0	1	22	1	1	0	0	0	0	0	0	0	0	0	0	0	0	0	0	0	0	0	0	1
1	1	21	1	1	0	1	0	0	0	0	0	0	0	0	0	0	0	0	0	0	0	0	1
0	0	41	0	0	0	0	0	0	0	0	0	0	0	0	0	0	0	0	0	0	0	0	1
0	1	41	0	1	0	0	0	0	0	0	0	0	1	0	0	0	0	0	0	0	1	0	1
1	1	55	0	0	1	0	0	0	0	0	0	0	0	0	0	0	0	0	0	0	1	0	1
1	0	50	0	0	0	0	0	0	0	0	0	0	0	0	0	0	0	0	0	0	1	0	1
0	1	28	0	0	0	0	0	0	0	0	0	0	0	0	0	0	0	0	0	0	0	0	1
1	0	48	0	0	0	0	0	0	0	0	0	0	0	0	0	0	0	0	0	0	0	0	1
1	0	52	0	0	0	0	0	0	0	0	0	0	1	0	0	0	0	0	0	0	0	0	1
1	0	74	0	0	1	0	0	0	0	0	0	1	0	0	0	0	0	0	0	0	1	1	1
0	1	31	0	0	0	0	0	0	0	0	0	0	0	0	0	0	0	0	0	0	0	0	1
0	0	49	0	0	0	0	0	0	0	0	0	0	0	0	0	0	0	0	0	0	1	0	1
1	1	78	0	0	0	0	0	0	0	0	0	0	0	0	0	0	0	0	0	0	1	0	1
0	0	42	0	0	0	0	0	0	0	0	0	1	0	0	0	0	0	0	0	0	0	0	1
0	1	25	0	0	1	0	0	0	0	0	0	0	0	0	0	0	0	0	0	0	0	0	1
0	1	33	0	0	1	0	0	0	0	0	0	1	0	0	0	0	0	0	0	0	0	0	1
0	1	37	0	0	0	0	0	0	0	0	0	0	0	0	0	0	0	0	0	0	0	0	1
1	1	60	0	0	0	0	0	0	0	0	0	0	0	0	0	0	0	0	0	0	1	0	1
1	0	33	0	0	1	0	0	0	0	0	0	0	0	0	0	0	0	0	0	0	0	0	1
1	1	69	0	1	0	1	0	0	0	0	0	0	0	0	0	0	0	0	0	0	1	0	1
1	1	56	0	0	0	0	0	0	0	0	0	0	0	0	0	0	0	0	0	0	0	0	1
0	1	22	0	0	0	0	0	0	0	0	0	0	0	0	0	0	0	0	0	0	0	0	1
1	1	75	0	0	0	0	0	0	0	0	0	0	0	0	0	0	1	0	0	0	1	0	1
0	1	26	1	0	0	0	0	0	0	0	0	0	0	0	0	0	0	0	0	0	0	0	1
1	1	69	0	0	0	0	0	0	0	0	0	0	0	0	0	0	0	0	0	0	1	0	1
0	1	28	1	1	0	1	0	1	0	0	0	0	0	0	0	0	0	0	0	0	0	0	1
0	0	74	0	0	1	0	0	0	0	0	0	0	0	0	0	0	0	0	0	0	1	0	1
0	1	56	0	0	0	0	0	0	0	0	0	0	0	0	0	0	0	0	0	0	1	0	1
0	1	23	0	0	0	0	0	0	0	1	0	0	0	0	0	0	0	0	0	0	0	0	1
1	0	32	0	0	0	0	0	0	0	0	0	0	0	0	0	0	0	0	0	0	0	0	1
1	1	58	0	0	0	0	0	0	0	0	0	0	0	1	0	0	0	0	0	0	1	0	1
1	1	78	0	0	0	0	0	0	0	0	0	0	0	0	0	0	0	0	0	0	0	0	1
1	0	40	0	0	1	0	0	0	0	0	0	1	0	0	0	0	0	0	0	0	1	0	1
0	0	21	1	1	0	1	0	0	0	0	0	0	0	0	0	0	0	0	0	0	1	0	1
1	1	43	0	0	1	0	0	0	0	0	0	0	0	0	0	0	0	0	0	1	1	0	1
1	0	71	0	0	1	0	0	0	0	0	0	0	0	0	0	0	0	0	0	0	0	0	1
0	0	22	1	1	0	1	0	0	0	0	0	0	0	0	0	0	0	0	0	0	1	0	1
0	0	36	0	0	0	0	0	0	0	0	0	0	0	0	0	0	0	0	0	0	0	0	1
0	0	53	0	0	0	0	0	0	0	0	0	0	0	0	0	0	0	0	0	0	1	0	1
1	0	90	0	0	0	0	0	0	1	0	0	0	0	1	0	0	0	0	0	0	1	1	1
0	0	29	0	0	0	0	0	0	0	0	0	0	0	0	0	0	0	0	0	0	1	0	1
1	1	58	0	0	0	0	0	0	0	0	0	0	1	0	0	0	0	1	0	0	1	0	1
0	1	21	1	0	0	0	0	0	0	0	0	0	0	1	0	0	0	0	0	0	0	0	1
0	1	34	0	0	0	0	0	0	0	0	0	0	1	0	0	0	0	0	0	0	0	0	1
0	1	33	0	0	0	0	0	1	0	0	0	0	0	0	0	0	0	0	0	0	1	0	1
1	1	63	0	0	0	0	0	0	0	0	0	0	0	0	0	0	0	0	0	0	0	0	1
0	1	39	0	1	0	0	0	0	0	0	0	0	0	0	0	0	0	0	0	0	0	0	1
1	0	77	0	0	0	0	0	0	0	0	0	0	1	0	0	0	0	0	0	0	1	1	1
0	1	34	0	0	0	0	0	0	0	0	0	0	0	0	0	0	0	0	0	0	0	0	1
1	1	52	0	0	0	0	0	0	1	0	0	0	1	0	0	0	0	0	0	0	1	1	1
0	1	37	0	0	0	0	0	0	0	1	0	0	0	0	0	0	0	0	0	0	0	0	1
1	0	48	0	0	0	0	0	0	0	0	0	0	1	0	0	0	0	0	0	0	1	0	1
1	0	75	0	0	0	0	0	0	0	0	0	0	1	0	0	0	0	0	0	0	1	0	1
1	0	55	0	0	0	0	0	0	0	0	0	0	0	0	0	0	0	0	0	0	1	0	1
1	0	64	0	0	0	0	0	0	0	0	0	0	0	0	0	0	0	1	0	0	0	0	1
1	0	74	0	0	0	0	0	0	0	0	1	0	0	0	0	0	0	0	0	0	0	0	1
0	1	25	0	0	0	0	0	0	0	0	0	0	0	0	0	0	0	0	0	0	0	0	1
1	0	33	0	0	1	0	1	1	0	1	0	0	0	0	0	0	0	0	0	0	1	1	1
0	1	40	0	0	0	0	0	0	0	0	0	0	0	0	0	0	0	0	0	0	1	0	1
1	0	63	1	0	0	0	0	0	0	0	1	0	1	0	0	0	0	1	0	0	1	1	1
0	1	22	0	0	0	0	0	0	0	0	0	0	0	0	0	0	0	0	0	0	0	0	1
0	1	34	0	0	0	0	0	0	0	0	0	0	0	0	0	0	0	0	0	0	0	0	1
0	1	34	0	0	0	0	0	0	0	0	0	0	0	0	0	0	0	0	0	0	0	0	1
0	1	25	0	0	0	0	0	0	0	0	0	0	0	0	0	0	0	0	0	0	0	0	1
0	1	29	0	0	0	0	0	0	0	0	0	0	0	0	0	0	0	0	0	0	0	0	1
0	1	33	0	0	0	0	0	0	0	0	0	0	0	0	0	0	0	0	0	0	0	0	1
1	1	64	0	0	0	0	0	0	0	0	0	0	0	1	0	0	0	0	0	0	1	0	1
1	0	45	1	0	0	1	0	0	0	0	0	0	0	0	0	0	0	1	0	0	1	1	1
0	0	68	0	0	0	0	0	0	0	0	0	0	0	0	0	0	0	0	0	0	1	0	1
0	0	54	0	0	0	0	0	0	0	0	0	0	0	0	0	0	0	0	0	0	1	0	1
0	1	26	0	0	0	0	0	0	0	0	0	0	0	0	0	0	0	0	1	0	0	0	1
0	1	21	0	0	0	0	0	0	0	0	1	0	0	0	0	0	0	1	0	0	0	0	1
0	1	24	0	0	0	0	0	0	0	0	0	0	0	0	0	0	0	0	0	0	0	0	1
1	1	68	0	0	0	0	0	0	0	0	0	0	0	0	0	0	0	0	0	0	0	0	1
1	1	38	0	0	0	0	0	0	0	0	0	0	0	0	0	0	0	0	0	0	0	0	1
0	0	29	0	0	1	1	0	0	0	0	0	0	0	1	0	0	0	0	0	0	0	0	1
0	1	22	0	0	0	0	0	0	0	0	0	0	0	0	0	0	0	0	0	0	0	0	1
0	1	49	0	0	0	0	0	0	0	0	0	0	0	0	0	0	0	0	0	0	1	0	1
0	0	41	0	0	0	0	0	0	0	0	0	0	1	0	0	0	0	0	0	0	0	0	1
0	1	48	0	0	0	0	0	0	0	0	0	0	0	0	0	0	0	0	0	0	0	0	1
0	1	30	0	0	0	0	0	0	0	1	0	0	0	0	0	0	0	0	0	0	0	0	1
0	1	23	0	0	0	0	0	0	0	0	0	1	0	1	0	0	0	0	0	0	0	0	1
1	1	54	1	1	0	1	0	1	0	0	1	0	0	0	0	0	0	0	0	0	0	0	1
1	1	64	0	0	0	0	0	0	0	0	0	0	0	0	0	0	0	0	0	0	0	0	1
1	0	22	0	0	0	0	0	0	0	0	0	0	0	0	0	0	0	0	0	0	1	0	1
1	1	69	0	0	0	0	0	0	0	0	0	1	1	0	0	0	0	0	0	0	1	0	1
1	0	62	1	0	0	0	0	0	0	0	0	0	1	0	1	0	0	0	0	0	1	1	1
0	1	20	1	0	0	0	0	0	0	0	0	0	0	0	0	0	0	0	0	0	0	0	1
1	1	78	0	0	1	0	0	0	0	0	0	0	0	0	0	0	0	0	0	1	1	0	1
0	0	22	0	0	1	0	0	0	0	0	1	0	0	0	0	0	0	0	0	0	0	0	1
0	1	59	0	0	0	0	0	0	0	0	1	0	0	0	0	0	0	0	0	0	1	0	1
0	1	25	0	0	0	0	0	0	0	0	0	0	0	0	0	0	0	0	0	0	0	0	1
1	1	55	0	0	0	0	0	0	0	0	0	0	0	0	0	0	0	0	0	0	1	0	1
1	1	68	0	0	1	0	0	0	0	0	0	0	1	0	0	0	0	0	0	0	0	0	1
1	0	59	0	0	1	0	0	0	0	0	0	0	0	0	0	0	0	0	0	0	0	0	1
1	1	32	0	0	1	0	0	0	0	0	0	0	0	0	0	0	0	0	0	0	0	0	1
0	1	27	1	1	0	1	0	0	0	0	0	0	0	0	0	0	0	0	0	0	0	0	1
0	1	23	0	0	0	1	0	0	0	0	0	0	0	0	0	0	0	0	0	0	0	0	1
0	1	29	1	0	0	0	0	0	0	1	0	0	0	0	0	0	0	0	0	0	0	0	1
0	1	35	0	0	0	0	0	0	0	0	0	0	0	0	0	0	0	0	0	0	0	0	1
0	1	39	0	0	0	0	0	0	0	0	0	0	0	0	0	0	0	0	0	0	0	0	1
1	1	39	0	0	0	0	0	0	0	0	0	0	0	0	0	0	0	0	0	0	1	0	1
1	1	54	0	0	0	1	0	0	0	0	0	0	1	0	0	0	0	0	0	0	1	0	1
0	1	25	1	1	0	1	0	0	0	1	0	0	0	0	0	0	0	0	0	0	0	0	1
0	1	54	0	0	0	1	1	1	0	0	0	0	0	0	0	0	0	0	0	0	1	0	1
1	1	68	0	0	0	0	0	0	0	0	0	0	0	0	0	0	0	0	0	0	0	0	1
0	1	40	0	0	0	0	0	0	0	0	0	0	0	0	0	0	0	0	0	0	0	0	1
0	0	37	0	0	0	0	0	0	0	0	0	0	0	0	0	0	0	0	0	0	0	0	1
0	1	29	0	0	0	0	0	1	0	1	0	0	0	0	0	0	0	0	0	0	0	0	1
0	0	44	1	1	0	1	0	0	0	0	1	0	1	0	0	0	0	0	0	0	1	0	1
1	1	61	0	0	0	0	0	0	0	0	1	0	0	0	0	0	0	0	0	0	1	1	1
0	1	23	0	1	0	0	0	0	0	1	0	0	0	0	0	0	0	0	0	0	0	0	1
0	1	34	0	0	1	0	0	0	0	0	0	0	0	0	0	0	0	0	0	0	0	0	1
0	1	29	0	0	0	0	0	0	0	0	0	0	0	0	0	0	0	0	0	0	0	0	1
0	1	44	0	0	0	0	0	0	0	0	0	0	0	0	0	0	0	0	0	0	1	0	1
0	1	36	0	0	1	0	0	0	0	0	0	0	0	0	0	0	0	0	0	0	0	0	1
1	0	45	0	0	0	0	0	0	0	0	0	1	0	0	0	0	0	0	0	0	0	0	1
1	1	52	0	0	0	0	0	0	0	0	0	1	0	0	0	0	0	0	0	0	1	0	1
0	1	52	1	1	0	1	0	0	0	0	0	0	0	0	0	0	0	1	0	0	1	1	1
1	1	28	0	0	1	0	0	0	0	0	1	0	1	0	0	0	0	0	0	0	0	0	1
0	1	54	0	0	0	0	0	0	0	0	0	0	1	0	0	0	0	0	1	0	1	1	1
0	1	32	0	1	0	0	0	0	0	0	0	0	0	0	0	0	0	0	0	0	0	0	1
0	1	48	0	0	0	0	0	0	0	0	0	0	1	0	0	0	0	0	0	0	0	0	1
1	1	52	0	0	0	0	0	0	0	0	0	0	0	0	0	0	0	0	0	0	0	0	1
0	1	30	0	0	0	0	0	0	0	0	0	0	0	0	0	0	0	0	0	0	0	0	1
0	1	19	0	0	0	0	0	0	0	1	0	0	0	0	0	1	0	0	0	0	0	0	1
0	1	20	0	0	0	0	0	0	0	1	0	0	0	0	0	0	0	0	0	0	0	0	1
1	0	41	0	0	0	0	0	0	0	0	0	0	0	0	0	0	0	1	0	0	0	0	1
1	1	77	0	0	0	0	0	0	0	0	0	1	1	0	0	0	0	0	0	0	1	1	1
1	0	61	0	0	0	0	0	0	0	0	1	0	0	0	0	0	0	0	0	0	1	1	1
1	0	52	0	0	1	0	0	0	0	0	0	0	0	0	0	0	0	0	0	0	1	0	1
0	1	48	0	0	1	0	0	0	0	0	0	0	0	0	0	0	0	0	0	0	0	0	1
0	1	32	1	0	0	0	0	0	0	0	0	0	0	0	0	0	0	0	0	0	0	0	1
1	0	24	0	0	1	0	0	0	0	0	0	0	0	0	0	0	0	0	0	0	0	0	1
1	1	26	0	0	1	0	0	0	0	0	0	0	0	0	0	0	0	0	0	0	1	0	1
0	0	47	0	0	0	0	0	0	0	0	0	0	0	0	0	0	0	0	0	0	0	0	1
1	1	67	0	0	0	0	0	0	0	0	0	1	0	1	0	0	0	0	0	0	1	0	1
1	0	70	0	0	0	0	0	0	0	0	0	0	1	0	0	0	0	0	0	0	0	0	1
1	1	31	0	0	1	1	0	0	0	0	0	0	0	0	0	0	0	0	0	0	1	0	1
1	1	30	1	0	0	0	0	0	0	0	0	0	0	0	0	0	0	0	0	0	0	0	1
0	1	47	1	1	0	1	0	0	0	0	0	0	1	0	0	0	0	0	0	0	1	0	1
0	1	38	0	0	0	0	0	0	0	0	0	0	0	0	0	0	0	0	0	0	0	0	1
1	0	60	0	0	1	0	0	0	0	0	0	0	0	0	0	0	0	0	0	0	0	0	1
0	1	26	1	0	0	0	0	0	0	0	0	0	0	0	0	0	0	0	0	0	0	0	1
1	1	69	1	0	0	0	0	0	0	0	0	0	0	0	0	0	0	0	0	0	0	0	1
1	1	20	1	1	0	0	0	0	0	1	0	0	0	0	0	0	0	0	0	0	0	0	1
1	1	74	0	0	0	0	0	0	0	0	1	0	0	0	0	0	0	0	0	0	0	0	1
0	1	25	0	0	0	0	0	0	0	0	0	0	0	0	0	0	0	0	0	0	0	0	1
1	1	56	0	0	0	0	0	1	0	0	0	0	0	1	0	0	0	0	0	0	1	1	1
1	1	19	1	1	0	1	0	0	0	0	0	0	0	0	0	0	0	0	0	0	0	0	1
0	1	28	1	0	0	0	0	0	0	0	0	0	0	0	0	0	0	0	0	0	0	0	1
1	1	42	0	0	0	0	0	0	0	0	0	0	0	0	0	0	0	0	0	0	0	0	1
0	1	29	1	0	0	0	0	0	0	1	0	0	0	0	0	0	0	0	0	0	1	0	1
0	1	45	0	0	0	0	0	0	0	0	0	0	0	0	0	0	0	0	0	0	1	0	1
0	1	23	1	1	0	1	0	0	0	0	0	0	0	0	0	0	0	0	0	0	1	0	1
0	1	39	0	0	0	0	0	0	0	0	0	0	0	0	0	0	0	0	0	0	0	0	1
1	1	61	0	0	0	0	0	0	1	0	0	0	0	0	0	0	0	0	0	0	1	1	1
0	1	31	0	0	0	0	0	0	0	0	0	1	0	0	0	0	0	0	0	0	0	0	1
1	0	33	0	0	0	0	0	0	0	0	0	0	0	0	0	0	0	0	0	0	0	0	1
1	0	46	0	0	1	0	0	0	0	0	0	0	0	0	0	0	0	0	0	0	1	0	1
0	1	30	1	0	0	0	0	0	0	0	0	0	0	0	0	0	0	0	0	0	0	0	1
1	1	40	0	0	0	0	0	0	0	0	0	0	0	0	0	0	0	0	0	0	0	0	1
1	1	37	0	0	1	0	0	0	0	0	0	0	0	0	0	0	0	0	0	0	1	0	1
0	1	26	0	0	0	0	0	0	0	0	0	0	0	0	0	0	0	0	0	0	0	0	1
1	0	28	0	0	1	0	0	0	0	0	0	0	1	0	0	0	0	0	0	0	0	0	1
0	1	33	0	0	1	0	0	0	0	0	0	0	0	0	0	0	0	0	0	0	0	0	1
0	1	31	0	0	0	0	0	0	0	0	0	0	0	0	0	0	0	0	0	0	0	0	1
1	1	75	0	0	1	0	0	0	0	0	0	0	0	0	0	0	0	0	0	0	1	0	1
0	1	45	0	0	0	0	0	0	0	0	0	0	0	0	0	0	0	0	0	0	0	0	1
1	1	41	0	0	0	0	0	0	0	1	0	0	0	0	0	0	0	0	0	0	0	0	1
0	1	44	0	0	0	0	0	0	0	0	0	0	0	0	0	0	0	0	0	0	0	0	1
0	0	22	0	0	0	0	0	0	0	0	1	0	0	0	0	0	0	0	0	0	0	0	1
0	1	35	0	0	1	0	0	0	0	0	0	0	0	1	0	0	0	0	0	0	1	0	1
1	0	43	0	0	1	0	0	0	0	0	0	0	0	0	0	0	0	0	0	0	0	0	1
0	1	26	0	0	0	0	0	0	0	0	0	0	1	0	0	0	0	0	0	0	0	0	1
0	1	24	0	0	0	0	0	0	0	0	0	1	0	0	0	0	0	0	0	0	1	1	1
0	1	20	0	0	0	0	0	0	0	0	0	0	0	0	0	0	0	0	0	0	0	0	1
0	1	28	0	0	0	0	0	0	0	0	0	0	0	0	0	0	0	0	0	0	0	0	1
1	1	79	0	0	0	0	0	0	0	0	0	0	1	0	0	0	0	0	0	1	1	0	1
0	1	40	0	0	0	0	0	0	0	0	0	0	0	0	0	0	0	0	0	0	0	0	1
0	1	48	0	0	0	0	0	0	0	0	0	0	0	0	0	0	0	0	0	0	1	1	1
0	1	27	0	0	0	0	0	0	0	0	0	0	0	0	0	0	0	0	0	0	0	0	1
0	1	35	0	0	0	0	0	0	0	0	0	0	0	0	0	0	0	0	0	0	0	0	1
0	1	46	0	0	1	0	0	0	0	0	0	0	1	0	0	0	0	0	0	0	0	0	1
1	0	66	0	0	0	0	0	0	0	1	0	0	0	0	0	0	0	0	0	0	1	0	1
1	0	47	1	1	0	1	0	0	0	0	0	0	1	0	0	0	0	0	0	0	1	1	1
0	1	26	1	0	0	0	0	0	0	0	0	0	0	0	0	0	0	0	0	0	0	0	1
0	1	24	0	0	0	0	0	0	0	0	0	0	0	0	0	0	0	0	0	0	0	0	1
1	0	72	1	0	0	0	0	0	0	0	0	0	0	0	0	0	0	0	0	0	1	0	1
1	1	20	1	1	0	1	0	0	0	0	0	1	0	0	0	0	0	0	0	0	0	0	1
0	1	21	0	0	0	0	0	0	0	0	0	0	0	0	0	0	0	0	0	0	0	0	1
0	1	64	0	0	0	0	0	0	0	0	0	0	1	0	0	0	0	0	0	0	0	0	1
0	1	30	0	0	0	0	0	0	0	0	0	0	0	0	0	0	0	0	0	0	1	1	1
1	1	68	0	0	0	0	0	0	0	0	0	0	0	0	0	0	0	0	0	0	1	0	1
0	0	26	1	1	0	1	0	0	0	0	1	0	0	0	0	0	0	0	0	0	0	0	1
1	1	39	0	0	0	0	0	0	0	0	0	0	0	0	0	0	0	0	0	0	0	0	1
0	1	33	0	0	0	0	0	0	0	0	0	0	0	0	0	0	0	0	0	0	1	0	1
1	1	51	0	0	0	0	0	0	0	0	0	0	0	0	0	0	0	0	0	0	1	0	1
1	0	65	0	0	0	0	0	0	0	0	0	0	0	0	0	0	0	0	0	0	0	0	1
0	1	36	0	0	0	0	0	0	0	0	0	0	0	0	0	0	0	0	0	0	0	0	1
1	0	46	0	0	1	0	0	0	0	0	1	0	0	0	0	0	0	0	0	0	1	0	1
1	0	77	0	0	0	0	0	0	0	0	0	0	1	0	1	0	0	0	0	0	1	0	1
0	1	28	0	0	0	0	0	0	0	0	0	0	0	0	0	0	0	0	0	0	0	0	1
0	1	47	1	0	0	0	0	0	0	0	0	0	0	0	0	0	0	0	0	0	1	0	1
0	1	34	0	0	0	0	0	0	0	0	0	0	0	0	0	0	0	0	0	0	0	0	1
0	1	31	0	0	0	0	0	0	0	0	0	0	0	0	0	0	0	0	0	0	0	0	1
1	1	26	1	0	0	0	0	0	0	0	0	0	1	0	0	0	0	0	0	0	0	0	1
1	1	52	0	0	0	0	0	0	0	0	0	0	0	0	0	0	0	0	0	0	1	1	1
1	1	57	0	0	0	0	0	0	0	0	1	0	0	0	0	0	0	0	0	0	0	0	1
1	0	53	0	0	0	0	0	0	0	0	0	0	0	0	0	0	0	0	0	0	0	0	1
0	1	21	0	0	1	0	0	0	0	0	0	1	0	0	0	0	0	0	0	0	0	0	1
0	0	45	0	0	0	0	0	0	0	0	0	0	1	0	0	0	0	0	0	0	1	0	1
0	1	34	0	0	0	0	0	0	0	1	0	0	0	0	0	0	0	0	0	0	0	0	1
0	1	29	0	0	0	0	0	0	0	0	0	0	0	0	0	0	0	0	0	0	0	0	1
1	1	63	0	0	0	0	0	0	0	0	0	0	0	0	0	0	0	0	0	0	1	0	1
0	0	28	0	0	0	0	0	0	0	0	0	0	0	0	0	0	0	0	0	0	0	0	1
1	1	55	0	0	0	0	0	0	0	0	0	0	0	0	0	0	0	0	0	0	0	0	1
0	1	40	0	0	0	0	0	0	0	0	0	0	0	0	0	0	0	0	0	0	0	0	1
0	1	27	0	0	0	0	0	0	0	1	0	0	0	1	0	0	0	0	0	0	0	0	1
0	1	41	0	0	0	0	0	0	0	0	0	0	0	0	0	0	0	0	0	0	0	0	1
0	1	44	0	0	0	0	0	0	0	0	0	0	0	0	0	0	0	0	0	0	0	0	1
0	1	34	1	1	0	1	0	0	0	0	0	0	0	0	0	0	0	0	0	0	0	0	1
1	0	64	0	0	0	0	0	0	1	0	0	0	1	0	0	0	0	0	0	0	1	1	1
0	1	44	0	0	0	0	0	0	0	0	0	0	0	0	0	0	0	0	0	0	0	0	1
0	1	26	1	0	0	0	0	1	0	0	0	0	0	0	0	0	0	0	0	0	1	0	1
1	0	54	0	0	0	0	0	0	0	0	0	0	0	0	0	0	0	0	0	0	1	1	1
0	1	24	0	0	0	0	0	0	0	0	0	0	0	0	0	0	0	1	0	0	0	0	1
0	1	35	0	0	0	0	0	0	0	0	0	0	0	0	0	0	0	0	0	0	0	0	1
1	1	38	0	0	0	0	0	0	0	0	0	0	0	0	0	0	1	0	0	0	1	0	1
0	1	26	0	0	0	0	0	0	0	0	0	0	0	0	0	0	0	0	0	0	0	0	1
0	1	45	0	0	0	0	0	0	0	0	0	0	0	0	0	0	0	0	0	0	1	0	1
0	1	20	0	0	0	0	0	0	0	0	0	0	0	0	0	0	0	0	0	0	0	0	1
0	0	22	1	0	0	0	0	0	0	0	0	1	0	0	0	0	0	0	0	0	1	0	1
0	1	53	0	0	0	0	0	0	0	0	0	0	0	0	0	0	0	0	0	0	0	0	1
0	0	52	0	0	0	0	0	0	0	0	0	0	1	0	0	0	0	0	0	0	0	0	1
0	1	37	0	0	1	1	0	0	0	0	0	0	1	0	0	0	0	0	0	0	0	0	1
1	1	20	1	1	0	1	0	1	0	0	0	0	0	0	0	0	0	0	0	0	0	0	1
0	1	35	1	1	0	1	0	0	0	0	0	0	0	0	0	0	0	0	0	0	1	0	1
0	1	46	0	0	0	0	0	0	0	0	0	0	0	0	0	0	0	0	0	0	0	0	1
1	1	77	0	0	0	0	0	0	0	0	0	0	0	0	0	0	0	0	0	0	0	0	1
0	1	32	0	0	1	0	0	0	0	0	0	0	0	0	0	0	0	0	0	0	1	0	1
0	1	54	0	0	1	0	0	1	0	0	0	0	0	0	0	0	0	0	0	0	0	0	1
0	1	33	0	0	0	0	0	0	0	0	0	0	0	0	0	0	0	0	0	0	1	0	1
0	1	19	0	0	0	0	0	0	0	0	0	0	0	0	0	0	0	0	0	0	0	0	1
0	0	46	0	0	0	0	0	0	0	0	0	0	1	0	0	0	0	0	0	0	1	0	1
0	1	39	0	0	0	0	0	0	0	0	0	0	0	0	0	0	0	0	0	0	0	0	1
0	1	41	0	0	0	0	0	0	0	0	0	0	0	0	0	0	0	0	0	0	0	0	1
0	1	40	0	0	0	0	0	0	0	0	0	0	0	0	0	0	0	0	0	0	0	0	1
0	1	54	0	0	0	0	0	0	0	0	0	0	0	0	0	0	0	0	0	0	0	0	1
0	1	48	0	0	0	0	0	0	0	0	0	0	0	0	0	0	0	0	0	0	0	0	1
0	1	32	0	0	0	0	0	0	0	1	0	0	1	0	0	0	0	0	0	0	0	0	1
0	0	47	0	0	0	0	0	0	0	0	0	1	1	0	0	0	0	0	0	0	0	0	1
1	0	50	0	0	1	0	0	0	0	0	0	0	0	0	0	0	0	0	0	0	1	0	1
0	1	55	0	0	0	0	0	0	0	0	0	0	0	0	0	0	0	0	0	0	0	0	1
0	1	20	0	0	0	0	0	0	0	0	0	0	0	0	0	0	0	0	0	0	0	0	1
1	1	80	0	0	0	0	0	0	0	0	0	0	0	0	0	0	0	0	0	0	0	0	1
1	1	76	0	0	1	0	0	0	0	0	1	0	0	0	0	0	0	0	0	0	1	0	1
0	1	24	0	1	0	0	0	0	0	0	0	0	0	0	0	0	0	0	0	0	0	0	1
0	1	49	0	0	0	0	0	0	0	0	0	0	0	0	0	0	0	0	0	0	1	0	1
1	0	33	0	1	0	0	0	0	0	0	1	0	0	0	0	0	0	0	0	0	1	1	1
1	1	73	0	1	0	0	0	0	0	1	0	0	0	0	0	0	0	0	0	0	1	0	1
0	1	51	0	0	0	0	0	0	0	0	0	0	0	0	0	0	0	0	0	0	1	0	1
0	1	41	0	0	0	0	0	0	0	0	0	0	0	0	0	0	0	0	0	0	0	0	1
0	1	55	0	0	0	0	0	0	0	0	0	0	0	0	0	0	0	0	0	0	0	0	1
0	1	27	0	0	0	0	0	0	0	0	0	0	0	1	0	0	0	0	0	0	1	0	1
1	0	68	0	0	0	0	1	1	0	0	1	0	0	0	0	0	0	0	0	0	1	0	1
1	0	23	0	0	0	0	0	0	0	0	1	0	0	0	0	0	0	0	0	0	1	1	1
0	1	28	0	0	1	0	0	0	0	0	0	0	0	0	0	0	0	0	0	0	0	0	1
0	1	22	0	0	0	0	0	0	0	1	0	0	0	0	0	0	0	0	0	0	0	0	1
1	1	42	0	0	0	0	0	0	0	0	0	1	1	0	0	0	0	0	0	0	1	1	1
0	1	45	0	0	0	0	0	0	0	0	0	0	0	0	0	0	0	0	0	0	0	0	1
0	1	33	0	0	0	0	0	0	0	0	0	0	0	0	0	0	0	0	0	0	0	0	1
0	1	36	1	0	0	0	0	0	0	0	0	0	0	0	0	0	0	0	0	0	0	0	1
0	1	26	0	0	0	0	0	0	0	0	0	1	0	0	0	0	0	0	0	0	0	0	1
0	0	36	0	0	0	0	0	0	0	0	0	0	0	0	0	0	0	0	0	0	0	0	1
1	1	37	0	0	1	0	0	0	0	0	0	0	0	0	0	0	0	0	0	0	0	0	1
0	1	37	0	0	0	0	0	0	0	0	0	0	0	0	0	0	0	0	0	0	0	0	1
1	0	69	0	0	0	1	0	0	0	0	0	0	1	0	0	0	0	0	0	0	0	0	1
0	0	21	0	0	0	0	0	0	0	0	0	0	0	0	0	0	0	0	0	0	0	0	1
1	0	42	0	0	1	0	0	0	0	0	0	0	0	1	0	0	0	0	0	0	1	0	1
1	1	76	0	0	0	0	0	0	0	0	0	0	0	0	0	0	0	0	0	0	0	0	1
1	1	68	1	1	0	1	0	0	0	0	0	0	1	0	0	0	0	0	0	0	0	0	1
1	1	50	0	0	0	0	0	0	0	0	0	0	0	0	0	0	0	0	0	0	0	0	1
0	1	27	0	0	0	0	0	0	0	0	0	0	0	0	0	0	0	0	0	0	0	0	1
0	1	45	0	0	0	0	0	0	0	0	0	0	0	0	0	0	0	0	0	0	0	0	1
0	1	41	0	1	0	0	0	0	0	0	0	0	0	0	0	0	0	0	0	0	0	0	1
0	1	32	0	0	0	0	0	0	0	0	0	0	0	0	0	0	0	0	0	0	0	0	1
0	0	24	1	0	0	0	0	0	0	1	0	0	1	0	0	0	0	0	0	0	1	0	1
1	1	71	0	0	0	0	0	0	0	0	1	0	0	0	0	0	0	1	0	0	1	0	1
0	1	51	0	0	0	0	0	0	0	0	0	0	0	0	0	0	0	0	0	0	1	1	1
0	1	48	0	0	1	0	0	0	0	0	0	0	0	1	0	0	0	0	0	0	0	0	1
1	0	73	0	0	0	0	0	0	0	0	0	0	1	0	1	0	0	0	0	0	1	0	1
0	1	37	0	0	0	0	0	0	0	0	0	0	0	0	0	0	0	0	0	0	0	0	1
0	1	48	0	0	0	0	0	0	0	0	0	0	0	0	0	0	0	0	0	0	0	0	1
1	0	79	0	0	1	1	0	1	0	0	0	0	0	0	0	0	0	0	0	0	1	0	1
0	1	36	0	0	0	0	0	0	0	0	0	0	0	0	0	0	0	0	0	0	0	0	1
0	1	47	0	0	0	0	0	0	0	0	0	0	0	0	0	0	0	0	0	0	0	0	1
1	0	53	0	0	0	0	0	0	0	0	0	0	0	0	0	0	0	0	0	0	0	0	1
1	1	67	0	0	1	0	0	0	0	0	0	0	0	0	0	0	0	0	0	0	1	0	1
0	1	33	0	0	0	0	0	0	0	0	0	0	1	0	0	0	0	0	0	0	1	0	1
0	1	35	0	0	0	0	0	0	0	0	0	0	0	0	0	0	0	0	0	0	0	0	1
0	1	50	0	0	0	0	0	0	0	0	0	0	0	0	0	0	0	0	0	0	0	0	1
1	1	41	0	0	1	0	0	0	0	0	0	1	0	0	0	0	0	0	0	0	0	0	1
1	0	48	0	0	0	0	0	0	0	0	0	0	0	0	0	0	0	0	0	0	1	0	1
0	1	23	0	0	0	0	0	0	0	1	0	0	0	0	0	0	0	0	0	0	1	0	1
1	0	43	0	0	0	0	0	0	0	0	0	0	1	0	0	0	0	0	0	0	0	0	1
0	1	33	0	0	0	0	0	0	0	0	0	0	0	0	0	0	0	0	0	0	0	0	1
0	1	40	0	0	0	0	0	0	0	0	0	0	0	0	0	0	0	0	0	0	1	0	1
1	1	35	0	0	0	0	0	0	0	0	0	0	0	0	0	0	0	0	0	0	0	0	1
1	0	62	0	1	0	0	1	1	0	0	0	1	0	0	0	0	0	0	0	0	0	0	1
1	0	70	0	0	0	0	0	0	0	0	0	0	1	0	0	0	0	0	0	0	1	0	1
1	1	58	0	0	0	0	0	0	0	0	0	0	0	0	0	0	0	0	0	0	0	0	1
0	1	50	1	1	0	1	0	0	0	0	0	0	0	0	0	0	0	0	0	0	0	0	1
0	1	27	1	1	0	1	0	0	0	0	0	0	0	0	0	0	0	0	0	0	0	0	1
0	1	21	1	1	0	1	0	0	0	0	0	0	0	0	0	0	0	0	0	0	0	0	1
1	0	47	1	0	1	0	0	0	0	0	0	0	1	0	0	0	0	0	0	0	0	0	1
1	1	55	0	0	0	0	0	0	0	0	0	0	0	0	0	0	0	0	0	0	0	0	1
1	1	67	0	0	0	0	1	1	0	0	0	0	0	0	0	0	0	0	0	0	1	0	1
0	1	22	1	0	0	0	0	0	0	0	0	0	0	0	0	0	0	0	0	0	1	0	1
0	1	29	0	0	1	1	0	0	0	0	0	0	1	0	0	0	0	0	0	0	0	0	1
0	1	28	0	0	0	0	0	0	0	0	0	0	0	0	0	0	0	0	0	0	0	0	1
0	0	36	0	0	0	0	0	0	0	0	0	0	0	0	0	0	0	0	0	0	1	0	1
0	1	26	0	0	1	0	0	0	0	1	0	0	0	0	0	0	0	0	0	0	1	0	1
0	0	28	0	0	0	0	0	0	0	0	0	0	0	0	0	0	0	0	0	0	0	0	1
0	1	22	0	1	0	0	0	0	0	1	0	0	0	0	0	0	0	0	0	0	0	0	1
0	1	46	0	0	0	0	0	0	0	0	0	0	0	0	0	0	0	0	0	0	1	0	1
0	1	26	0	0	0	0	0	0	0	0	0	0	0	0	0	0	0	0	0	0	0	0	1
0	1	21	0	0	0	0	0	0	0	1	0	0	0	0	0	0	0	0	0	0	0	0	1
1	1	74	0	0	0	0	0	0	0	0	0	0	1	0	0	0	0	0	0	0	1	1	1
0	1	20	0	0	0	0	0	0	0	1	0	0	0	0	0	0	0	0	0	0	0	0	1
1	1	66	0	0	0	0	0	0	0	0	0	0	1	0	0	0	0	0	0	0	0	0	1
1	1	22	0	0	1	0	0	0	0	0	0	0	0	0	0	0	0	0	0	0	1	0	1
0	1	79	0	0	0	0	1	1	0	0	0	0	1	0	0	0	0	0	0	0	1	1	1
1	1	43	0	0	0	1	0	0	0	0	0	0	0	0	0	0	0	0	0	0	0	0	1
0	1	27	0	0	0	0	0	0	0	1	0	0	0	0	0	0	0	0	0	0	1	0	1
1	0	25	0	0	0	0	0	0	0	0	0	0	0	0	0	0	0	0	0	0	0	0	1
1	1	59	0	0	1	0	0	0	0	0	0	0	0	0	0	0	0	0	0	1	0	0	1
1	1	63	0	0	0	0	0	0	0	0	0	1	0	0	0	0	0	0	0	0	0	0	1
1	0	51	0	0	0	0	0	0	0	1	0	0	0	0	0	0	0	0	0	0	0	0	1
1	1	48	0	1	0	0	0	0	0	0	1	0	0	0	0	0	0	0	0	0	1	0	1
1	0	76	0	0	1	0	0	0	0	0	0	0	0	1	0	0	0	0	0	0	1	0	1
1	0	44	0	0	0	0	0	0	0	0	0	0	0	0	0	0	0	0	0	0	1	0	1
0	1	45	0	0	0	0	0	0	0	0	0	0	0	0	0	0	0	0	0	0	0	0	1
0	1	48	0	0	0	0	0	0	0	0	0	0	0	0	0	0	0	0	0	0	0	0	1
0	0	37	0	0	0	0	0	0	0	0	0	0	1	0	0	0	0	0	0	0	0	0	1
1	1	45	0	0	0	0	0	0	0	0	0	0	0	0	0	0	0	0	0	0	0	0	1
1	1	67	0	0	0	0	0	0	0	0	0	0	0	0	0	0	0	0	0	0	0	0	1
1	0	38	0	0	0	0	0	0	0	0	0	1	0	0	0	0	0	0	0	0	0	0	1
0	1	35	0	0	0	0	0	0	0	0	0	0	0	0	1	0	0	0	0	0	1	0	1
0	1	21	0	0	0	0	0	0	0	0	0	0	0	0	0	0	0	0	0	0	1	0	1
0	1	25	0	1	0	0	0	0	0	0	0	1	0	0	0	0	0	0	0	0	0	0	1
1	0	65	0	0	1	0	0	0	0	0	0	0	0	0	0	0	0	0	0	0	0	0	1
1	0	83	0	0	0	0	0	1	0	0	0	0	0	0	0	0	0	0	0	0	1	0	1
0	1	35	0	0	0	0	0	0	0	0	0	0	0	0	0	0	0	0	0	0	0	0	1
1	1	67	0	0	1	0	0	0	0	0	0	0	1	1	0	0	0	0	0	0	0	0	1
1	0	16	0	1	0	0	0	0	0	0	1	0	1	0	0	0	0	0	0	0	1	0	1
1	1	73	0	0	0	0	0	0	0	0	0	0	0	0	0	0	0	0	0	0	0	0	1
1	0	57	0	0	0	0	0	0	0	0	0	0	0	0	0	0	0	0	0	0	1	0	1
0	1	46	0	0	0	0	0	0	0	0	0	0	0	0	0	0	0	0	0	0	1	0	1
0	1	25	0	0	0	0	0	0	0	0	0	0	0	0	0	0	0	0	0	0	0	0	1
1	0	73	0	0	0	0	0	0	1	0	0	0	1	0	0	0	1	0	0	0	1	1	1
0	1	35	0	0	0	0	0	0	0	0	0	0	0	0	0	0	0	0	0	0	1	0	1
1	0	71	0	0	1	0	0	0	0	0	0	0	0	0	0	0	0	0	0	0	1	0	1
0	1	21	0	0	0	0	0	0	0	0	0	0	0	0	0	0	0	0	0	0	0	0	1
1	0	71	0	0	0	0	0	0	0	0	0	1	0	1	0	0	0	0	0	0	1	0	1
0	1	33	0	0	0	0	0	0	0	0	0	0	0	0	0	0	0	0	0	0	0	0	1
1	0	57	0	0	1	0	0	0	0	1	0	0	1	0	0	0	0	0	0	0	0	0	1
0	1	21	0	0	0	0	0	0	0	1	0	0	0	0	0	0	0	0	0	0	0	0	1
0	1	27	0	0	0	0	0	0	0	0	0	0	0	1	0	0	0	0	0	0	1	0	1
1	0	39	0	0	0	0	0	0	0	0	0	0	0	0	0	0	0	0	0	0	0	0	1
1	0	66	0	0	0	0	0	0	0	0	0	1	0	0	0	0	0	0	0	0	1	0	1
0	1	36	0	0	1	0	0	0	0	0	0	0	0	0	0	0	0	0	0	0	0	0	1
0	1	31	0	0	0	0	0	0	0	0	0	0	1	0	0	0	0	1	0	0	0	0	1
0	1	32	0	0	0	0	0	0	0	0	0	0	0	0	0	0	0	0	0	0	0	0	1
0	1	40	0	0	1	0	0	0	0	0	0	0	0	0	0	0	0	0	0	0	0	0	1
0	1	39	0	0	0	0	0	0	0	0	0	0	0	0	0	0	0	0	0	0	1	0	1
0	1	33	0	0	0	0	0	0	0	0	0	0	0	0	0	0	0	1	0	0	0	0	1
0	1	21	1	1	0	1	0	0	0	0	0	0	0	0	0	0	0	0	0	0	0	0	1
0	1	25	0	0	0	0	0	0	0	0	0	0	0	0	0	0	0	0	0	0	0	0	1
0	1	37	0	0	0	0	0	0	0	0	0	0	0	0	0	0	0	0	0	0	0	0	1
0	1	27	0	0	1	0	1	1	0	0	0	0	0	0	0	0	0	0	0	0	1	0	1
1	0	56	0	0	0	0	0	0	0	0	0	0	0	0	0	0	0	0	0	0	1	1	1
0	1	20	0	0	0	1	0	0	0	1	0	0	0	0	0	0	0	0	0	0	0	0	1
0	0	33	0	0	1	0	0	0	0	0	0	0	0	0	0	0	0	0	0	0	1	0	1
0	0	34	0	0	0	0	0	0	0	0	0	0	1	0	0	0	0	0	0	0	1	0	1
0	1	48	0	0	0	0	0	0	0	0	0	0	0	0	0	0	0	0	0	0	0	0	1
0	1	20	0	0	0	0	0	0	0	0	0	1	0	0	0	0	0	0	0	0	1	0	1
1	1	44	0	0	1	0	0	0	0	0	0	0	1	0	0	0	0	0	0	0	1	0	1
1	0	50	1	0	0	0	0	0	0	0	0	0	1	0	0	0	0	0	0	0	0	0	1
0	1	35	1	0	0	0	0	0	0	0	0	1	0	0	0	0	0	0	0	0	0	0	1
1	1	43	1	1	0	1	0	0	0	0	1	0	1	0	0	0	1	0	0	0	1	1	1
0	1	36	0	0	1	0	0	0	0	0	0	0	0	0	0	0	0	0	0	0	0	0	1
1	0	60	0	0	1	0	0	0	1	0	0	0	1	0	0	0	0	0	0	0	1	0	1
0	1	51	0	0	0	0	0	0	0	0	0	0	0	0	0	0	0	0	0	0	0	0	1
0	1	42	0	0	0	0	0	0	0	0	0	0	0	0	0	0	0	0	0	0	1	0	1
1	0	72	0	0	0	0	0	0	0	0	0	0	0	0	0	0	0	0	0	0	0	0	1
1	0	32	0	0	0	0	0	0	0	0	0	0	1	0	0	0	0	0	0	0	0	0	1
0	1	50	1	0	0	0	0	0	0	0	0	0	0	0	0	0	0	0	0	0	0	0	1
1	0	65	0	0	0	0	0	0	0	0	0	0	1	0	0	0	0	0	0	0	1	0	1
0	1	28	0	0	0	1	0	1	0	0	0	1	0	0	0	0	0	0	0	0	1	0	1
0	1	23	0	0	0	0	0	0	0	0	0	0	0	0	0	0	0	0	0	0	0	0	1
0	1	53	0	0	0	0	0	0	0	0	0	0	0	0	0	0	0	0	0	0	0	0	1
0	1	37	0	1	0	0	0	0	0	0	0	0	0	0	0	0	0	0	0	0	1	0	1
0	1	21	0	0	0	0	0	0	0	0	0	0	0	0	0	0	0	0	0	0	0	0	1
1	1	61	0	0	0	0	0	0	0	0	0	0	1	0	0	0	0	0	0	0	1	1	1
1	1	65	0	0	1	0	0	0	0	0	1	0	0	1	0	0	0	0	0	0	0	0	1
1	0	62	0	0	1	0	0	0	0	0	0	0	0	0	0	0	0	0	0	0	1	0	1
0	1	54	0	0	0	0	0	0	0	0	0	0	0	0	0	0	0	0	0	0	1	0	1
0	1	23	1	0	0	0	0	0	0	0	0	0	0	0	0	1	0	0	0	0	0	0	1
0	1	21	1	0	0	0	0	0	0	0	0	0	0	0	0	0	0	0	0	0	1	0	1
1	0	22	0	0	0	0	0	0	0	0	0	1	1	0	0	0	0	0	0	0	1	0	1
0	1	37	1	0	0	0	0	0	0	0	0	1	0	0	0	0	0	0	0	0	0	0	1
0	1	39	0	0	0	0	0	0	0	0	0	0	0	0	0	0	0	0	0	0	0	0	1
0	1	38	0	0	0	0	0	0	0	0	0	0	0	0	0	0	0	0	0	0	1	0	1
1	0	41	0	0	0	0	0	1	0	0	0	1	1	0	0	0	0	0	0	1	0	0	1
0	1	23	0	0	0	0	0	0	0	0	0	0	0	0	0	0	0	0	0	0	0	0	1
0	1	27	0	0	0	0	0	0	0	0	0	0	0	0	0	0	0	0	0	0	0	0	1
1	1	49	0	0	0	0	0	0	0	0	0	0	0	0	0	0	0	0	0	0	0	0	1
0	1	22	1	1	0	1	0	0	0	1	0	0	0	0	0	0	0	0	0	0	1	0	1
0	0	29	0	0	1	0	0	0	0	0	0	0	0	0	0	0	0	0	0	0	0	0	1
1	1	71	0	0	0	0	0	0	0	0	1	0	0	0	0	0	0	0	0	1	1	0	1
0	1	24	0	0	0	0	0	0	0	0	0	0	0	0	0	0	0	0	0	0	0	0	1
0	1	32	0	0	0	0	0	0	0	0	0	1	0	0	0	0	0	0	0	0	1	0	1
1	1	61	0	0	0	0	0	0	0	0	0	1	0	0	0	0	0	0	0	0	1	0	1
0	1	38	0	0	0	0	0	0	0	0	0	0	0	0	0	0	0	0	0	0	0	0	1
0	1	28	1	0	0	0	0	0	0	0	0	1	0	0	0	0	0	0	0	0	0	0	1
0	1	24	0	0	0	0	0	0	0	0	0	0	0	0	0	0	0	0	0	0	0	0	1
0	0	30	0	0	0	0	0	0	0	0	0	0	0	0	0	0	0	0	0	0	0	0	1
0	1	27	0	0	0	0	0	0	0	0	0	0	0	0	0	0	0	0	0	0	0	0	1
0	1	36	1	0	1	0	0	0	0	0	0	1	0	0	0	0	0	0	0	0	1	0	1
1	1	73	0	0	0	0	0	0	0	0	0	0	0	0	0	0	0	0	0	0	1	1	1
1	0	58	0	0	0	0	0	0	0	0	1	0	0	0	0	0	0	0	0	0	0	0	1
1	0	82	0	0	0	0	0	1	0	0	0	0	1	0	0	0	0	0	0	0	1	0	1
0	1	39	0	0	0	0	0	0	0	0	0	1	0	0	0	0	0	0	0	0	0	0	1
0	1	55	0	0	1	0	0	0	0	0	0	0	0	0	0	0	0	0	0	0	1	0	1
1	0	59	0	0	1	0	0	0	0	0	0	0	0	0	0	0	0	0	0	0	1	0	1
0	1	19	0	0	0	0	0	0	0	0	0	0	0	0	0	0	0	0	0	0	1	0	1
1	0	34	0	0	1	0	0	0	0	0	0	0	0	0	0	0	0	0	0	0	0	0	1
0	1	35	0	0	0	0	0	0	0	0	0	0	1	0	0	0	0	0	0	0	0	0	1
0	1	34	0	0	0	0	0	0	0	0	1	0	0	0	0	0	0	0	0	0	0	0	1
1	1	43	0	0	0	0	0	0	0	0	0	0	0	0	0	0	0	0	0	0	1	0	1
0	0	50	0	0	0	0	0	0	0	0	0	0	0	0	0	0	0	0	0	0	1	0	1
0	1	25	1	1	0	1	0	0	0	0	0	0	0	0	0	0	0	0	0	0	1	0	1
1	0	52	0	0	1	0	0	0	0	0	0	0	0	0	0	0	0	0	0	0	0	0	1
0	1	21	0	0	0	0	0	0	0	0	0	1	0	0	0	0	0	0	0	0	1	1	1
0	1	59	0	0	1	0	0	0	0	0	0	0	1	0	0	0	0	0	0	0	0	0	1
0	0	31	0	0	0	0	0	0	0	0	1	0	0	0	0	0	0	0	0	0	0	0	1
1	1	32	0	0	1	0	0	0	0	0	1	0	1	0	0	0	0	0	0	0	0	0	1
1	0	44	0	0	1	0	0	0	0	0	0	0	0	0	0	0	0	0	0	0	1	0	1
0	1	34	1	0	0	0	0	1	0	0	0	0	0	0	0	0	0	0	0	0	0	0	1
1	0	70	0	0	0	0	0	0	0	0	0	0	0	0	0	0	0	0	0	0	1	0	1
0	0	57	0	0	0	0	0	0	0	0	0	1	0	0	0	0	0	0	0	0	1	0	1
0	1	34	0	0	0	0	0	0	0	0	0	0	0	0	0	0	0	0	0	0	0	0	1
0	1	22	0	0	0	0	0	0	0	0	0	0	0	0	0	0	0	0	0	0	1	0	1
1	0	72	0	0	1	0	0	0	0	0	0	0	0	0	1	0	0	0	0	0	1	0	1
1	0	59	0	0	0	0	0	0	0	0	0	0	0	0	0	0	0	0	0	0	1	0	1
0	1	68	0	0	0	0	0	0	0	0	0	0	0	0	0	0	0	0	0	0	1	0	1
1	0	68	0	0	0	0	0	0	0	0	0	0	0	0	0	0	0	0	0	0	1	0	1
0	1	29	1	1	0	1	0	0	0	0	0	0	0	0	0	0	0	0	0	0	0	0	1
1	0	62	0	0	0	0	0	0	0	0	0	1	1	0	0	0	0	0	0	0	1	0	1
1	1	41	0	0	1	0	0	0	0	0	0	0	0	0	0	0	1	0	0	0	1	0	1
0	1	24	1	1	0	1	0	0	0	1	0	0	0	0	0	0	0	0	0	0	0	0	1
0	1	32	0	0	0	0	0	0	0	0	0	0	0	0	0	0	0	0	0	0	0	0	1
0	0	63	1	1	0	0	0	0	0	0	0	1	0	0	0	0	0	0	0	1	1	1	1
0	1	50	0	0	0	0	0	0	0	0	0	0	0	0	0	0	0	0	0	0	0	0	1
0	0	48	0	0	0	0	0	0	0	0	0	0	0	0	0	0	0	0	0	0	0	0	1
0	1	36	0	0	0	0	0	0	0	0	0	0	0	0	0	0	0	0	0	0	1	0	1
0	0	40	0	0	0	0	0	0	0	0	0	0	0	0	0	0	0	0	0	0	1	0	1
0	1	48	0	0	0	0	0	1	1	0	0	0	0	1	0	0	0	0	0	0	1	1	1
0	1	29	0	0	0	0	0	0	0	1	0	0	0	0	0	0	0	0	0	0	1	0	1
0	1	32	0	0	0	0	0	0	0	1	0	0	0	0	0	0	0	0	0	0	1	0	1
1	0	63	0	0	0	0	0	0	0	0	0	1	1	0	0	0	0	0	0	0	0	0	1
1	0	70	0	0	0	0	0	0	0	0	0	0	0	0	0	0	0	0	0	0	0	0	1
1	1	41	0	0	0	0	0	0	0	0	0	1	0	0	0	0	0	0	0	0	0	0	1
0	1	32	0	0	0	0	0	0	0	0	0	0	1	0	0	0	0	0	0	0	0	0	1
1	1	50	0	0	0	0	0	0	0	0	0	0	0	0	0	0	0	0	0	0	1	0	1
1	1	67	0	0	1	0	0	0	0	0	0	0	0	0	1	0	0	0	0	0	0	0	1
0	1	64	0	0	1	0	0	0	0	0	0	0	0	0	0	0	0	0	0	0	0	0	1
1	0	38	0	0	1	0	0	0	0	0	0	1	0	0	0	0	0	0	0	0	1	0	1
0	0	68	0	0	1	0	0	0	0	0	0	0	0	1	0	0	0	0	0	0	1	1	1
0	1	24	0	0	0	0	0	0	0	0	0	1	0	0	0	0	0	0	0	0	0	0	1
0	1	23	0	0	0	0	0	0	0	1	0	0	0	0	0	0	0	0	0	0	1	0	1
0	1	23	1	1	0	1	0	0	0	0	0	1	0	0	0	0	0	0	0	0	0	0	1
0	1	35	0	0	0	0	0	0	0	0	0	0	0	0	0	0	0	0	0	0	1	0	1
0	1	44	0	0	0	0	0	0	0	0	0	0	0	0	0	0	0	0	0	0	0	0	1
0	1	32	0	0	0	0	0	0	0	0	0	1	0	0	0	0	0	0	0	0	0	0	1
0	1	42	0	0	0	0	0	0	0	0	0	0	0	0	0	0	0	0	0	0	0	0	1
0	1	22	1	1	0	1	0	0	0	1	0	0	0	0	0	0	0	0	0	0	0	0	1
0	0	36	0	0	0	0	0	0	0	0	0	0	0	0	0	0	0	0	0	0	0	0	1
0	1	40	0	0	1	0	0	0	0	0	0	0	0	0	0	0	0	0	0	0	1	0	1
1	0	23	0	0	0	0	0	0	0	0	0	0	0	1	0	0	0	0	0	0	1	0	1
1	1	75	0	0	0	0	0	0	0	0	0	0	0	0	0	0	0	0	0	0	0	0	1
0	0	54	0	0	0	0	0	0	0	0	0	1	1	0	0	0	0	0	0	0	0	0	1
1	1	59	0	0	1	0	0	0	0	0	0	0	0	0	0	0	1	0	0	0	0	0	1
0	1	23	1	1	0	1	0	0	0	0	0	0	0	0	0	0	0	0	0	0	0	0	1
1	1	82	0	0	0	0	0	0	0	0	0	0	1	0	0	0	0	0	0	0	1	1	1
0	1	32	1	1	0	0	0	0	0	0	0	0	0	0	0	0	0	0	0	0	0	0	1
0	1	32	1	0	0	0	0	0	0	0	0	0	0	0	0	0	0	0	0	0	0	0	1
0	1	22	0	0	1	0	0	0	0	0	0	1	0	0	0	0	0	0	0	0	0	0	1
0	1	41	0	1	0	0	0	0	0	0	0	0	0	0	0	0	0	1	0	0	0	0	1
0	1	18	1	0	0	0	0	0	0	1	0	0	0	0	0	0	0	0	0	0	0	0	1
1	1	51	0	0	0	0	0	0	0	0	0	0	0	0	0	0	0	0	0	0	1	0	1
1	1	64	0	0	0	0	0	0	0	0	0	0	0	1	0	0	0	0	0	0	0	0	1
1	1	59	0	0	1	0	0	0	0	0	0	0	0	0	0	0	0	0	0	0	1	0	1
1	1	53	0	0	0	0	0	0	0	0	0	1	0	0	0	0	0	0	0	0	0	0	1
0	1	24	0	0	0	0	0	0	0	0	0	0	0	0	0	0	0	0	0	0	0	0	1
0	0	71	0	0	0	0	0	0	0	0	0	0	0	0	0	0	0	0	0	0	0	0	1
0	1	24	1	1	0	1	0	0	0	0	1	0	0	0	0	0	0	0	0	0	1	0	1
0	1	32	0	0	0	0	0	0	0	0	0	0	0	0	0	0	0	0	0	0	0	0	1
1	0	60	0	0	0	0	0	0	0	0	0	0	0	0	0	0	0	0	0	0	1	0	1
0	1	35	0	0	0	0	0	0	0	0	0	0	0	0	0	0	0	0	0	0	0	0	1
0	1	38	0	0	0	0	0	0	0	0	0	0	0	0	0	0	0	0	0	0	0	0	1
0	1	36	0	0	0	0	0	0	0	0	0	0	0	0	0	0	0	0	0	0	1	1	1
1	1	76	0	0	0	0	0	0	0	0	0	0	0	0	0	0	0	0	0	0	1	1	1
1	1	23	0	0	0	0	0	0	0	1	0	0	0	0	0	0	0	0	0	0	0	0	1
1	0	23	0	0	1	0	0	0	0	0	0	0	0	0	0	0	0	0	0	0	1	0	1
0	1	39	0	0	0	0	0	0	0	0	0	0	0	0	0	0	0	0	0	0	0	0	1
0	1	44	0	0	0	0	0	0	0	0	0	0	0	0	0	0	0	0	0	0	0	0	1
0	1	33	0	0	0	0	0	0	0	0	0	0	0	0	0	0	0	0	0	0	0	0	1
1	0	48	0	0	0	0	0	0	0	0	0	0	0	0	0	0	0	0	0	0	0	0	1
1	1	70	0	0	0	0	0	0	0	0	0	0	0	0	0	0	0	0	0	0	1	0	1
0	1	44	0	0	0	0	0	0	0	0	0	0	0	0	0	0	0	0	0	0	1	0	1
1	1	72	0	0	1	0	0	0	0	0	0	0	0	1	0	0	0	0	0	0	1	0	1
0	1	28	0	0	0	0	0	0	0	0	0	0	0	0	0	0	0	0	0	0	0	0	1
0	1	52	0	1	0	0	0	0	0	0	0	0	0	0	0	0	0	1	0	0	1	0	1
1	0	36	0	0	0	0	0	0	0	0	0	0	0	0	0	0	0	0	0	0	0	0	1
0	1	29	0	0	0	0	0	0	0	0	0	0	0	0	0	0	0	0	0	0	0	0	1
1	0	73	0	0	0	0	0	0	0	0	0	0	0	0	0	0	0	0	0	1	1	0	1
0	1	30	0	1	0	0	0	0	0	0	0	0	0	0	0	0	0	0	0	0	1	0	1
0	1	22	1	1	0	1	0	0	0	0	0	0	0	0	0	0	0	0	0	0	0	0	1
1	0	65	0	0	1	0	0	0	0	0	0	0	0	0	0	0	0	0	0	0	0	0	1
0	1	30	0	0	0	0	0	0	0	0	0	1	0	0	0	0	0	0	0	0	0	0	1
0	1	29	0	0	0	0	0	0	0	0	0	0	0	0	0	0	0	0	0	0	1	0	1
1	1	32	0	0	0	0	0	0	0	0	0	0	0	0	0	0	0	0	0	0	0	0	1
0	1	23	0	0	0	0	0	0	0	0	0	0	0	1	0	0	0	0	0	0	0	0	1
0	1	20	0	0	0	0	0	0	0	1	0	0	0	0	0	0	0	0	0	0	0	0	1
1	1	81	0	0	0	0	0	0	0	0	0	0	0	0	0	0	0	0	0	0	1	0	1
0	1	28	0	0	0	0	0	0	0	0	0	0	0	0	0	0	0	0	0	0	1	0	1
0	1	57	0	0	0	0	0	0	0	0	0	0	0	0	0	0	0	0	0	0	0	0	1
1	0	42	0	0	0	0	0	0	0	0	0	0	0	0	0	0	0	0	0	0	0	0	1
0	0	31	0	0	0	0	0	0	0	0	0	0	0	0	0	0	0	0	0	0	0	0	1
1	0	81	0	0	0	0	0	0	0	0	0	0	1	0	0	0	0	0	0	0	1	1	1
0	1	26	1	1	0	1	0	0	0	0	0	0	0	0	0	0	0	0	0	0	0	0	1
1	1	17	1	1	0	1	0	0	0	0	0	1	0	0	0	0	0	0	0	0	0	0	1
0	1	44	0	0	0	0	0	0	0	0	0	0	0	0	0	0	0	0	0	0	0	0	1
0	1	34	1	1	0	0	0	0	0	0	0	0	0	0	0	0	0	0	0	0	0	0	1
0	1	96	0	0	0	0	0	0	0	0	0	0	0	0	0	0	0	0	0	1	1	1	1
1	1	60	1	1	0	1	0	1	0	0	0	0	0	0	0	0	0	1	0	0	0	0	1
1	1	21	0	0	0	0	0	0	0	0	0	0	0	0	0	0	0	0	0	0	1	0	1
0	1	37	0	0	0	0	0	0	0	0	0	0	0	1	0	0	0	0	0	0	0	0	1
1	0	57	0	0	1	0	0	0	0	0	0	0	0	0	0	0	0	0	0	0	0	0	1
1	0	77	0	0	0	0	0	0	0	0	0	0	0	0	0	0	0	0	0	0	1	0	1
0	1	49	0	0	0	0	0	0	0	0	0	0	0	0	0	0	0	0	0	0	1	0	1
0	1	19	0	0	0	0	0	0	0	0	0	0	0	0	0	0	0	0	0	0	1	0	1
0	1	29	0	0	0	0	0	0	0	0	0	0	0	0	0	0	0	0	0	0	1	0	1
0	0	31	0	0	1	0	0	0	0	0	0	0	0	0	0	0	0	0	0	0	1	0	1
1	1	43	0	0	1	0	0	0	0	0	0	0	0	0	0	0	0	0	0	0	0	0	1
0	1	38	0	0	0	0	0	0	0	0	0	0	0	0	0	0	0	0	0	0	0	0	1
0	1	27	0	0	0	0	0	0	0	0	0	0	0	0	0	0	0	0	0	0	0	0	1
0	0	58	0	0	1	0	0	0	0	0	0	0	1	0	0	0	0	0	0	0	1	0	1
0	1	43	0	0	0	0	0	0	0	1	0	0	0	0	0	0	0	0	0	0	1	0	1
1	1	34	1	0	1	0	0	0	0	0	0	0	0	0	0	0	0	0	0	0	1	0	1
0	1	19	0	0	0	0	0	0	0	1	0	0	0	0	0	0	0	0	0	0	1	0	1
0	1	21	0	0	0	0	0	0	0	1	0	0	0	0	0	0	0	0	0	0	0	0	1
0	1	52	1	1	0	1	0	0	0	0	0	0	0	0	0	0	0	0	0	0	1	0	1
0	1	33	0	0	0	0	0	0	0	0	0	1	0	0	0	0	0	0	0	0	0	0	1
0	1	32	0	0	1	0	0	0	0	0	0	0	0	0	0	0	0	0	0	0	0	0	1
1	0	77	0	0	0	0	0	0	1	0	0	0	0	0	0	0	0	0	0	0	1	1	1
0	1	59	0	0	0	0	0	0	0	0	0	0	0	0	0	0	0	0	0	0	1	0	1
0	1	43	0	1	0	0	0	0	0	0	0	0	0	0	0	0	0	0	0	0	1	0	1
1	1	58	0	0	0	0	0	0	0	0	0	0	0	0	0	0	0	0	0	0	1	0	1
0	1	44	0	0	0	0	0	0	0	0	0	0	0	0	0	0	0	0	0	0	1	0	1
1	0	45	1	1	0	1	0	0	0	0	0	0	0	0	0	0	0	0	0	0	1	0	1
0	1	42	0	0	0	0	0	0	0	0	0	0	1	0	0	0	1	0	0	0	1	0	1
1	1	67	0	0	0	0	0	0	0	0	0	0	0	0	0	0	0	0	0	0	1	0	1
0	1	25	0	0	0	0	0	0	0	0	0	0	0	0	0	0	0	0	0	0	0	0	1
0	1	45	0	0	0	0	0	0	0	0	0	0	0	0	0	0	0	0	0	0	0	0	1
0	1	28	0	0	0	0	0	0	0	0	0	0	0	0	0	0	0	0	0	0	0	0	1
0	1	40	0	0	0	0	0	0	0	0	0	0	0	0	0	0	0	0	0	0	0	0	1
0	1	47	0	0	0	0	0	0	0	0	0	0	0	0	0	0	0	0	0	0	0	0	1
0	1	35	0	0	0	0	0	0	0	0	0	0	0	0	0	0	0	0	0	0	0	0	1
0	1	19	1	1	0	0	0	0	0	0	0	0	0	0	0	0	0	0	0	0	1	0	1
0	1	30	0	0	0	0	0	0	0	0	0	0	0	0	0	0	0	0	0	0	0	0	1
0	1	35	1	0	1	0	0	0	0	0	0	0	0	0	0	0	0	0	0	0	0	0	1
0	1	48	0	0	0	0	0	0	0	0	0	0	0	0	0	0	0	0	0	0	0	0	1
1	0	69	0	0	0	0	0	0	0	1	0	0	0	0	0	0	0	0	0	0	0	0	1
0	1	58	0	0	0	0	0	0	0	0	0	0	0	0	0	1	0	0	0	0	0	0	1
1	0	62	0	0	0	0	0	0	0	0	0	0	1	0	0	0	0	0	0	0	1	0	1
1	0	31	0	0	0	0	0	0	0	0	0	1	0	0	0	0	0	0	0	0	0	0	1
0	1	23	0	0	0	0	0	0	0	0	0	0	0	0	0	0	0	0	0	0	0	0	1
0	1	20	0	0	0	0	0	0	0	0	0	0	0	0	0	0	0	0	0	0	0	0	1
0	1	29	0	0	0	0	0	0	0	0	0	0	0	0	0	0	0	0	0	0	0	0	1
1	1	77	1	1	0	1	0	0	0	0	0	0	1	0	0	0	0	0	0	0	1	1	1
1	0	60	0	0	0	0	0	0	0	0	0	0	1	0	0	0	0	0	0	0	1	0	1
0	1	31	0	0	0	0	0	0	0	0	0	0	0	0	0	0	0	0	0	0	0	0	1
1	1	46	0	0	0	0	0	0	0	0	0	0	1	0	0	0	0	0	0	0	1	1	1
0	1	38	0	0	0	0	0	0	0	0	0	0	0	0	0	0	0	0	0	0	1	0	1
0	1	55	0	0	0	0	0	0	0	0	0	0	0	0	0	0	0	0	0	0	1	0	1
1	1	46	0	0	0	0	0	0	0	0	0	0	0	1	0	0	0	0	0	0	0	0	1
0	1	29	0	1	0	0	0	0	0	0	0	0	0	0	0	0	0	0	0	0	0	0	1
0	1	25	0	0	0	0	0	0	0	0	0	0	0	0	0	0	0	0	0	0	0	0	1
0	0	19	0	0	0	0	0	0	0	0	0	0	0	0	0	0	0	0	0	0	0	0	1
0	1	59	0	0	0	0	0	0	0	0	0	0	0	0	0	0	0	0	0	0	1	0	1
0	1	18	0	0	0	0	0	0	0	0	0	0	0	0	0	0	0	0	0	0	0	0	1
1	1	68	0	0	0	0	0	0	0	0	0	0	0	0	0	0	0	0	0	0	0	0	1
0	1	31	0	0	0	0	0	0	0	1	0	0	0	0	0	0	0	0	0	0	0	0	1
1	1	72	0	0	0	0	0	0	0	0	0	0	1	0	0	0	0	0	0	0	0	0	1
0	1	46	0	0	1	0	0	0	0	0	0	0	0	1	0	0	0	0	0	0	0	0	1
1	1	43	0	0	0	0	0	0	0	0	0	0	0	0	0	0	0	0	0	0	0	0	1
0	1	21	0	0	0	0	0	0	0	0	0	1	1	0	0	0	0	0	0	0	0	0	1
0	1	25	0	1	0	0	0	0	0	0	0	1	0	0	0	0	0	0	0	0	0	0	1
1	1	67	0	0	0	0	0	0	0	0	0	0	0	0	0	0	0	0	0	0	1	0	1
1	0	79	0	0	1	0	0	0	0	0	0	0	0	0	0	0	0	0	0	0	0	0	1
1	1	52	0	1	0	0	0	0	0	0	0	0	0	0	0	0	0	0	0	0	1	0	1
1	1	69	1	1	0	1	0	0	0	0	0	0	1	0	0	0	0	1	0	0	1	1	1
0	1	24	0	0	0	0	0	0	0	0	0	0	0	0	0	0	0	0	0	0	0	0	1
0	0	34	0	0	0	0	0	0	0	0	1	0	0	0	0	0	0	0	0	0	0	0	1
0	1	22	1	1	0	1	0	0	0	0	0	0	0	0	0	0	0	0	0	0	0	0	1
0	1	31	0	0	0	0	0	0	0	1	0	0	0	0	0	0	0	0	0	0	0	0	1
1	0	25	0	0	0	0	0	0	0	0	0	0	0	0	0	0	0	0	0	0	0	0	1
1	1	59	0	0	1	0	0	0	0	0	0	0	0	0	0	0	0	0	0	0	1	0	1
0	0	43	0	0	0	0	0	0	0	0	0	0	0	0	0	0	0	0	0	0	1	0	1
0	0	22	0	0	0	0	0	0	0	0	0	0	0	0	1	0	0	0	0	0	1	0	1
0	1	33	0	0	0	0	0	0	0	0	0	0	0	0	0	0	0	0	0	0	0	0	1
1	0	62	0	1	0	0	0	0	1	0	0	0	0	0	0	0	0	0	0	0	1	1	1
0	1	21	0	0	0	0	0	0	0	0	0	0	0	1	0	0	0	0	0	0	0	0	1
1	0	22	1	1	0	1	0	0	0	0	1	0	0	0	0	0	0	0	0	0	1	1	1
0	0	20	0	0	0	0	0	0	0	0	0	0	0	0	0	0	0	0	0	0	1	0	1
0	1	29	0	0	0	0	0	0	0	0	0	0	0	0	0	0	0	0	0	0	0	0	1
1	1	71	0	0	0	0	0	1	0	0	0	0	0	1	0	0	0	0	0	1	1	0	1
0	1	56	0	0	0	0	0	0	0	0	0	0	0	0	0	0	0	0	0	0	0	0	1
1	1	73	0	0	0	0	0	0	0	0	1	0	0	0	0	0	0	0	0	0	1	0	1
0	1	53	0	0	0	0	0	0	0	0	0	0	0	0	0	0	0	0	0	0	0	0	1
0	1	57	0	0	0	0	0	0	0	0	0	0	0	0	0	0	0	0	0	0	0	0	1
1	1	55	0	0	1	0	0	0	0	0	0	0	0	1	0	0	0	0	0	0	0	0	1
0	1	25	0	0	0	0	0	0	0	0	0	1	0	0	0	0	0	0	0	0	1	0	1
0	1	22	0	1	0	0	0	0	0	0	0	0	0	0	0	0	0	0	0	0	0	0	1
1	1	40	1	0	0	0	0	0	0	0	0	0	1	0	0	0	0	0	0	0	1	1	1
0	1	40	0	0	0	0	0	0	0	0	0	0	0	0	0	0	0	0	0	0	1	0	1
1	0	64	0	0	0	0	0	0	1	0	0	0	0	0	0	0	0	0	0	0	1	1	1
0	1	29	0	0	0	0	0	0	0	0	0	0	0	0	0	0	0	0	0	0	0	0	1
1	0	62	0	0	0	0	0	0	0	0	0	1	0	0	0	0	0	0	0	0	1	1	1
0	1	39	0	0	0	0	0	0	0	0	0	0	0	0	0	0	0	0	0	0	0	0	1
1	1	62	0	0	0	0	0	0	0	0	0	0	0	0	0	0	0	0	0	0	1	0	1
0	1	44	0	0	0	0	0	0	0	0	0	0	0	0	0	0	0	0	0	0	1	0	1
0	1	24	0	0	0	0	0	0	0	0	0	0	0	0	0	0	0	0	0	0	1	0	1
0	1	60	0	1	0	0	0	0	0	0	0	0	0	0	0	0	0	0	0	0	0	0	1
0	0	47	0	0	0	0	0	0	0	0	0	0	0	0	0	0	0	0	0	0	1	0	1
1	0	37	0	0	0	0	0	0	0	0	0	1	1	0	0	0	0	0	0	0	0	0	1
0	1	29	0	0	0	0	0	0	0	0	0	0	0	0	0	0	0	0	0	0	0	0	1
1	0	47	0	0	0	0	0	0	0	0	0	0	0	0	0	0	0	0	0	0	1	0	1
1	0	77	0	0	0	0	0	0	0	0	1	0	0	0	0	0	1	0	0	0	1	1	1
1	1	72	0	0	0	0	0	0	0	0	0	0	0	0	0	0	0	0	0	0	1	0	1
0	1	33	0	0	0	0	0	0	0	0	0	0	0	0	0	0	0	0	0	0	0	0	1
1	0	48	0	0	0	1	0	0	0	0	0	0	0	0	0	0	0	0	0	0	0	0	1
0	1	22	0	0	0	0	0	1	0	0	0	0	0	0	0	0	0	0	0	0	0	0	1
1	1	62	0	0	0	0	0	0	0	0	0	0	0	0	0	0	0	0	0	0	1	0	1
0	1	25	0	0	0	0	0	0	0	0	0	0	1	0	0	0	0	0	0	0	0	0	1
0	0	23	0	1	0	0	0	0	0	0	0	0	0	0	0	0	0	0	0	0	0	0	1
1	1	40	0	0	0	0	0	0	0	0	0	0	0	0	0	0	0	0	0	0	0	0	1
1	1	39	0	0	0	0	0	0	0	0	0	0	1	0	0	0	0	0	0	0	1	0	1
0	0	45	0	0	0	0	0	0	0	0	0	0	0	0	0	0	0	0	0	0	0	0	1
1	0	49	0	0	0	0	0	0	0	0	0	1	1	0	0	0	0	0	0	0	1	0	1
1	1	80	0	0	0	0	0	0	0	0	0	0	0	0	0	0	0	0	0	0	1	0	1
1	0	67	0	0	1	0	1	1	0	0	0	0	0	0	0	0	0	0	0	0	0	0	1
0	1	40	0	0	0	0	0	0	0	0	0	0	0	1	0	0	0	0	0	0	0	0	1
0	1	34	0	0	0	0	0	0	0	0	0	0	0	1	0	0	0	0	0	0	0	0	1
0	1	53	0	0	0	0	0	0	0	0	0	0	0	0	0	0	0	0	0	0	1	0	1
1	0	80	0	0	0	0	0	0	0	0	0	1	0	0	0	0	0	0	0	0	1	0	1
0	1	33	0	1	0	0	0	0	0	0	0	0	0	0	0	0	0	0	0	0	0	0	1
0	0	30	0	0	1	0	0	0	0	0	0	0	0	0	0	0	0	0	0	0	0	0	1
1	1	77	0	0	0	0	0	0	1	0	0	0	0	0	0	0	0	0	0	0	1	1	1
0	0	27	0	0	0	0	0	0	0	1	0	0	0	0	0	0	0	0	0	0	0	0	1
0	1	45	0	0	0	0	0	0	0	0	0	0	0	0	0	0	0	0	0	0	0	0	1
0	1	29	0	0	0	0	0	0	0	0	0	0	0	0	0	0	0	0	0	0	0	0	1
0	0	66	0	0	0	0	0	0	0	0	0	0	0	0	0	0	0	0	0	0	0	0	1
1	0	68	0	0	1	0	0	0	0	0	0	0	1	0	0	0	0	0	0	0	1	0	1
0	1	48	0	0	0	0	0	0	0	0	0	0	0	1	0	0	0	0	0	0	0	0	1
0	1	34	1	1	0	0	0	0	0	0	0	0	0	0	0	0	0	0	0	0	0	0	1
0	1	28	0	0	1	0	0	0	0	0	1	0	0	0	0	0	0	1	0	0	0	0	1
0	0	24	0	0	0	0	0	0	0	0	0	0	0	0	0	0	0	0	0	0	0	0	1
0	1	29	0	0	1	0	0	0	0	1	0	0	0	0	0	0	0	0	0	0	0	0	1
0	1	22	1	1	0	1	0	0	0	0	0	0	0	0	0	0	0	0	0	0	0	0	1
0	0	21	0	1	0	0	0	0	0	0	0	0	0	0	0	0	0	0	0	0	0	0	1
0	1	22	1	1	0	1	0	0	0	0	0	0	0	0	0	0	0	0	0	0	0	0	1
0	0	49	0	0	0	0	0	0	0	0	0	0	1	0	0	0	0	0	0	0	1	0	1
0	1	24	0	0	0	0	0	0	0	0	0	0	0	0	0	0	0	0	0	0	0	0	1
0	1	35	1	0	0	0	0	0	0	0	0	0	0	0	0	0	0	0	0	0	0	0	1
0	0	49	0	0	0	0	0	0	0	0	0	0	0	0	0	0	0	0	0	0	0	0	1
0	1	36	0	0	1	0	0	0	0	0	0	0	0	0	0	0	0	0	0	0	0	0	1
0	1	26	0	0	0	0	0	0	0	0	0	0	0	0	0	0	0	0	0	0	0	0	1
0	1	60	0	0	1	0	0	0	0	0	0	0	0	0	0	0	0	0	0	0	1	0	1
1	1	35	0	0	0	0	0	0	0	0	0	1	0	0	0	0	0	0	0	0	1	0	1
1	1	35	0	0	0	0	0	1	0	0	0	0	0	1	0	0	0	1	0	0	1	1	1
0	1	47	0	0	0	0	0	0	0	0	0	0	0	0	0	0	0	0	0	0	1	0	1
0	1	36	0	0	0	0	0	0	0	0	0	0	0	0	0	0	0	0	0	0	0	0	1
1	0	72	0	0	0	0	0	0	0	0	0	0	0	0	0	0	0	0	0	0	0	0	1
0	1	21	1	0	0	0	0	0	0	0	0	0	0	0	0	0	0	0	0	0	0	0	1
0	1	28	0	0	0	0	0	0	0	1	0	0	0	0	0	0	0	0	0	0	0	0	1
0	1	20	0	0	0	0	0	0	0	0	0	0	0	0	0	0	0	0	0	0	0	0	1
0	0	23	0	0	0	0	0	0	0	0	0	0	0	0	0	0	0	0	0	0	0	0	1
0	1	34	0	0	0	0	0	0	0	0	0	0	0	0	0	0	0	0	0	0	1	0	1
1	1	20	0	0	0	0	0	0	0	0	0	0	0	0	0	0	0	0	0	0	0	0	1
0	1	29	1	1	0	1	0	0	0	0	0	0	0	0	0	0	0	0	0	0	0	0	1
1	1	44	1	0	0	0	0	0	0	0	0	1	1	0	0	0	0	0	0	0	1	0	1
0	1	42	0	0	0	0	0	0	0	0	0	0	0	0	0	0	0	0	0	0	0	0	1
0	1	40	0	0	0	0	0	0	0	0	0	0	0	0	0	0	0	0	0	0	1	0	1
0	1	61	0	1	0	0	0	0	0	0	0	0	0	0	0	0	0	1	0	0	1	0	1
0	1	39	0	0	0	0	0	0	0	0	0	0	0	0	0	0	0	0	0	0	1	0	1
0	1	50	0	0	0	0	0	0	0	0	0	0	0	0	0	0	0	0	0	0	1	0	1
0	1	53	0	0	0	0	0	0	0	0	1	0	1	0	0	0	0	0	0	0	1	0	1
1	0	48	0	0	0	0	0	0	0	0	0	0	0	0	0	0	0	0	0	0	1	1	1
0	1	34	0	0	0	0	0	0	0	0	0	0	0	0	0	0	0	0	0	0	0	0	1
0	1	21	1	1	0	1	0	0	0	0	0	0	0	0	0	0	0	0	0	1	0	0	1
1	0	24	0	0	0	0	0	0	0	0	0	0	0	0	0	0	0	0	0	0	0	0	1
1	0	61	1	0	1	0	0	0	0	1	0	0	1	0	0	0	0	0	0	0	0	0	1
1	1	69	0	0	0	0	0	0	0	0	0	0	0	0	0	0	0	0	0	0	1	0	1
1	0	52	0	0	0	0	0	0	0	0	0	1	0	0	0	0	0	0	0	0	1	1	1
0	1	22	1	1	0	1	0	0	0	0	1	0	0	0	0	0	0	0	0	0	0	0	1
1	1	76	0	0	0	0	0	1	0	0	0	0	1	0	0	0	0	0	0	0	1	1	1
0	0	29	0	0	1	0	0	0	0	0	0	0	0	0	0	0	0	0	0	0	0	0	1
0	1	45	0	0	0	0	0	0	0	0	0	0	0	0	0	0	0	0	0	0	0	0	1
1	0	70	1	1	0	1	0	0	0	0	0	0	1	0	1	0	0	0	0	0	1	1	1
1	0	58	0	0	0	0	0	0	0	0	0	1	0	0	0	0	0	0	0	0	0	0	1
0	1	33	0	0	0	0	0	0	0	0	0	0	0	0	0	0	0	0	0	0	0	0	1
0	1	19	0	0	1	0	0	0	0	0	0	0	0	0	0	0	0	0	0	0	0	0	1
0	0	48	0	0	0	0	0	0	0	0	0	0	0	0	0	0	0	0	0	0	0	0	1
0	1	20	0	0	1	0	0	0	0	1	0	0	0	0	0	0	0	0	0	0	0	0	1
0	1	28	1	1	0	1	0	0	0	0	0	0	0	0	0	0	0	1	0	0	1	0	1
0	1	26	0	0	0	0	0	0	0	0	0	0	0	0	0	0	0	0	0	0	0	0	1
0	0	26	0	0	0	0	0	0	0	1	0	0	0	0	0	0	0	0	0	0	0	0	1
0	1	28	0	0	0	0	0	0	0	0	0	0	0	0	0	0	0	0	0	0	0	0	1
0	1	43	0	0	0	0	0	0	0	0	0	0	0	0	0	0	0	0	0	0	0	0	1
0	1	28	0	0	1	0	0	0	0	0	0	0	0	0	0	0	0	0	0	0	0	0	1
0	1	27	1	1	0	1	0	0	0	0	0	0	0	0	0	0	0	0	0	0	0	0	1
0	1	48	0	0	0	0	0	0	0	0	1	0	1	0	0	0	0	0	0	0	1	1	1
1	0	51	0	0	0	0	0	0	0	0	0	0	0	0	0	0	0	0	0	0	0	0	1
0	1	30	0	0	0	0	1	1	0	0	0	1	0	0	0	0	0	0	0	0	0	0	1
0	1	31	0	0	0	0	0	0	0	0	0	0	0	0	0	0	0	0	0	0	0	0	1
[truncated: 4,604 more rows]
