# Supplementary material for: Derivation and internal validation of prediction models for pulmonary hypertension risk assessment in a cohort inhabiting Tibet, China
Source: eLife journal article supplement (doi:10.7554/elife.98169), 2024-08-07
Supplement: fig4-data1 [file Figure-CF.xlsx]

## Sheet: Sheet1
Tibetan	0.633	0.612 0.655		2.2e-16		Tibetan	0.634	0.620 0.648		2.2e-16
Age	0.696	0.672 0.720		7.326e-05		Age	0.699	0.684 0.699 0.715		1.758e-07
Gender	0.41	0.389 0.430		2.2e-16		Gender	0.428	0.415 0.441		2.2e-16
IRBBB	0.508	0.502 0.515		2.2e-16		IRBBB	0.511	0.507 0.515		2.2e-16
AF	0.511	0.505 0.517		2.2e-16		AF	0.517	513 0.521		2.2e-16
ST	0.51	0.50 0.52		2.2e-16		ST	0.516	0.510 0.523		2.2e-16
TC	0.548	0.531 0.564		2.2e-16		TC	0.542	0.532 0.553		1.758e-07
VAD	0.701 0.716 0.731					DEV	0.695 0.718 0.741
