# Supplementary material for: Derivation and internal validation of prediction models for pulmonary hypertension risk assessment in a cohort inhabiting Tibet, China
Source: eLife journal article supplement (doi:10.7554/elife.98169), 2024-08-07
Supplement: fig4-data1 [file Figure-IL.xlsx]

## Sheet: Sheet1
Tibetan	0.672	0.635 0.708	9.272e-14			Tibetan	0.71	0.688 0.733	2.2e-16
Age	0.744	0.705 0.784	0.0004414			Age	0.779	0.755 0.802	6.04e-13
RAD	0.55	0.516 0.583	2.2e-16			RAD	0.549	0.527 0.572	2.2e-16
IRBBB	0.529	0.509 0.548	2.2e-16			IRBBB	0.528	0.516 0.541	2.2e-16
AF	0.541	0.519 0.562	2.2e-16			AF	0.559	0.543 0.576	2.2e-16
ST	0.564	0.535 0.592	2.2e-16			ST	0.555	0.537 0.573	2.2e-16
TC	0.57	0.536 0.604	2.2e-16			TC	0.596	0.572 0.619	2.2e-16
PP	0.543	0.520 0.566	2.2e-16			PP	0.538	0.523 0.552	2.2e-16
HVRV	0.551	0.521 0.581	2.2e-16			HVRV	0.543	0.523 0.562	2.2e-16
val	0.823 0.844 0.865					dev	0.763 0.801 0.838
