# Supplementary material for: Derivation and internal validation of prediction models for pulmonary hypertension risk assessment in a cohort inhabiting Tibet, China
Source: eLife journal article supplement (doi:10.7554/elife.98169), 2024-08-07
Supplement: fig6-data1 [file Figure6-ABEF.xlsx]

## Sheet: Sheet1
PH	train	0.2-0.91		PH2	train	0.01-0.70
PH	val	0.14-0.74		PH2	val	0.01-0.82
